# Supplementary material for: Gene Expression Changes During the Allo-/Deallopolyploidization Process of Brassica napus
Source: Front Genet. 2019 Dec 19;10:1279. doi: 10.3389/fgene.2019.01279 (PMC6931035; doi:10.3389/fgene.2019.01279)
Supplement: Supplementary file 3 [file DataSheet_3.xlsx]

## Sheet: all.hypo.call.filtered.RBR
DMR(differentially methylated region) show hypo methylation in RBR versus An-subgenome of ZS11
					Test		Control		Methylation			cpG numbers
#chrom	start	end	length	hypo/hyper	Cytosine counts	Thymine counts	Cytosine counts	Thymine counts	Test	Control	P-value	Test	Control	Gene associated regions
chrA01	212100	212600	500	hypo	27	51	83	21	34.62	79.81	0.00158	12	11	GSBRNA2T00121590001:exon
chrA01	965800	966300	500	hypo	3	54	51	5	5.26	91.07	1.56e-08	9	10	GSBRNA2T00121410001:promoter
chrA01	1059400	1059900	500	hypo	2	104	23	62	1.89	27.06	7.95e-06	9	9	GSBRNA2T00121384001:promoter
chrA01	1194800	1195300	500	hypo	0	46	99	44	0	69.23	8.56e-08	5	20	GSBRNA2T00121362001:promoter
chrA01	1278500	1279000	500	hypo	0	74	92	81	0	53.18	2.89e-09	5	16	GSBRNA2T00121339001:promoter
chrA01	1411300	1411800	500	hypo	17	49	59	7	25.76	89.39	8.9e-05	10	5	GSBRNA2T00121301001:exon
chrA01	2412700	2413200	500	hypo	16	52	36	4	23.53	90	0.000134	10	6	GSBRNA2T00121030001:promoter
chrA01	2412700	2413200	500	hypo	16	52	36	4	23.53	90	0.000134	10	6	GSBRNA2T00121030001:promoter,GSBRNA2T00121031001:exon
chrA01	2651800	2652300	500	hypo	1	70	71	31	1.41	69.61	5.42e-10	5	15	GSBRNA2T00074004001:promoter
chrA01	3140400	3140900	500	hypo	0	64	44	21	0	67.69	3.95e-09	6	7	GSBRNA2T00039886001:promoter
chrA01	3500500	3501000	500	hypo	21	47	43	13	30.88	76.79	0.00415	8	5	GSBRNA2T00076776001:promoter,GSBRNA2T00076775001:promoter
chrA01	3833400	3833900	500	hypo	0	48	31	1	0	96.88	1.04e-08	7	6	GSBRNA2T00058131001:promoter
chrA01	3833400	3833900	500	hypo	0	48	31	1	0	96.88	1.04e-08	7	6	GSBRNA2T00058131001:promoter,GSBRNA2T00058131001:exon,GSBRNA2T00058131001:exon
chrA01	4038100	4038600	500	hypo	0	57	66	69	0	48.89	5.3e-07	8	13	GSBRNA2T00058087001:promoter
chrA01	4038100	4038600	500	hypo	0	57	66	69	0	48.89	5.3e-07	8	13	GSBRNA2T00058087001:promoter,GSBRNA2T00058087001:exon,GSBRNA2T00058086001:exon
chrA01	4532000	4532500	500	hypo	0	80	68	98	0	40.96	5.11e-08	5	7	GSBRNA2T00131337001:intron
chrA01	4997900	4998400	500	hypo	0	75	25	12	0	67.57	1.19e-09	9	6	GSBRNA2T00131433001:exon,GSBRNA2T00131433001:exon
chrA01	5276000	5277000	1000	hypo	5	89	77	9	5.32	89.53	9.31e-13	14	12	GSBRNA2T00131507001:exon,GSBRNA2T00131507001:exon,GSBRNA2T00131507001:exon,GSBRNA2T00131507001:exon,GSBRNA2T00131507001:exon,GSBRNA2T00131507001:exon
chrA01	5444300	5444800	500	hypo	45	100	114	30	31.03	79.17	7.4e-06	7	9	GSBRNA2T00131555001:promoter,GSBRNA2T00131554001:promoter
chrA01	5546500	5547000	500	hypo	0	31	50	15	0	76.92	5.97e-06	5	7	GSBRNA2T00131577001:promoter
chrA01	5566100	5566600	500	hypo	0	45	215	19	0	91.88	6.54e-10	7	14	GSBRNA2T00131583001:promoter
chrA01	6018100	6018600	500	hypo	0	115	62	95	0	39.49	2.57e-10	5	12	GSBRNA2T00131685001:promoter
chrA01	6153800	6154300	500	hypo	0	74	50	35	0	58.82	1.95e-09	6	11	GSBRNA2T00131730001:promoter
chrA01	6536700	6537700	1000	hypo	0	194	81	54	0	60	1.71e-21	13	10	GSBRNA2T00079529001:promoter
chrA01	6557200	6557700	500	hypo	16	27	94	7	37.21	93.07	0.00418	5	7	GSBRNA2T00079532001:promoter,GSBRNA2T00079534001:promoter
chrA01	6557200	6557700	500	hypo	16	27	94	7	37.21	93.07	0.00418	5	7	GSBRNA2T00079532001:promoter,GSBRNA2T00079534001:promoter,GSBRNA2T00079532001:exon
chrA01	6599900	6600400	500	hypo	0	46	56	28	0	66.67	2.88e-07	5	12	GSBRNA2T00079543001:promoter,GSBRNA2T00079542001:promoter
chrA01	6880500	6881000	500	hypo	6	36	30	7	14.29	81.08	0.000233	6	7	GSBRNA2T00087820001:exon
chrA01	6957400	6957900	500	hypo	9	92	66	42	8.91	61.11	3.03e-08	8	8	GSBRNA2T00056291001:promoter
chrA01	6988500	6989000	500	hypo	20	69	29	15	22.47	65.91	0.00144	10	5	GSBRNA2T00056299001:promoter
chrA01	6988500	6989000	500	hypo	20	69	29	15	22.47	65.91	0.00144	10	5	GSBRNA2T00056299001:promoter,GSBRNA2T00056300001:exon,GSBRNA2T00056300001:exon
chrA01	7333200	7333700	500	hypo	0	52	64	54	0	54.24	5.25e-07	5	14	GSBRNA2T00056388001:promoter
chrA01	7377800	7378300	500	hypo	0	80	31	64	0	32.63	1.48e-06	6	12	GSBRNA2T00149680001:exon
chrA01	7520600	7521100	500	hypo	2	43	88	13	4.44	87.13	9.11e-08	7	9	GSBRNA2T00149639001:promoter,GSBRNA2T00149638001:promoter
chrA01	7649500	7650000	500	hypo	13	30	63	5	30.23	92.65	0.00151	8	7	GSBRNA2T00149624001:exon
chrA01	7790900	7791400	500	hypo	0	64	51	42	0	54.84	4.25e-08	6	15	GSBRNA2T00149598001:promoter
chrA01	8165400	8165900	500	hypo	0	47	41	8	0	83.67	3.24e-08	6	9	GSBRNA2T00149516001:promoter
chrA01	8190100	8190600	500	hypo	0	57	36	18	0	66.67	3.91e-08	7	7	GSBRNA2T00149510001:promoter,GSBRNA2T00149511001:promoter
chrA01	8356700	8358500	1800	hypo	7	215	161	111	3.15	59.19	8.2e-22	23	25	GSBRNA2T00149472001:exon
chrA01	8786500	8787500	1000	hypo	132	99	241	36	57.14	87	0.00266	18	22	GSBRNA2T00149399001:promoter
chrA01	9653300	9654300	1000	hypo	189	186	303	16	50.4	94.98	1.11e-07	23	24	GSBRNA2T00075706001:promoter
chrA01	9770200	9771200	1000	hypo	110	130	152	30	45.83	83.52	0.000153	19	20	GSBRNA2T00021249001:promoter
chrA01	9770200	9771200	1000	hypo	110	130	152	30	45.83	83.52	0.000153	19	20	GSBRNA2T00021249001:promoter,GSBRNA2T00021248001:exon
chrA01	10065300	10065800	500	hypo	0	58	41	58	0	41.41	3.69e-06	7	7	GSBRNA2T00021289001:promoter
chrA01	10270700	10271200	500	hypo	8	21	51	7	27.59	87.93	0.00703	5	7	GSBRNA2T00021326001:intron
chrA01	10905700	10906200	500	hypo	0	55	68	19	0	78.16	2.32e-09	9	10	GSBRNA2T00054043001:promoter,GSBRNA2T00054044001:promoter
chrA01	11337600	11338600	1000	hypo	123	92	192	12	57.21	94.12	0.000968	16	21	GSBRNA2T00138410001:promoter
chrA01	12309800	12310300	500	hypo	5	68	88	8	6.85	91.67	1.49e-10	6	14	GSBRNA2T00138528001:promoter
chrA01	12823200	12823700	500	hypo	20	31	39	1	39.22	97.5	0.00796	8	7	GSBRNA2T00138596001:promoter,GSBRNA2T00138597001:promoter
chrA01	13160700	13161200	500	hypo	0	44	40	36	0	52.63	6.87e-06	5	10	GSBRNA2T00138651001:promoter
chrA01	14238800	14239300	500	hypo	5	63	49	63	7.35	43.75	7.27e-05	8	14	GSBRNA2T00080349001:exon,GSBRNA2T00080349001:exon,GSBRNA2T00080349001:exon
chrA01	14570800	14571800	1000	hypo	0	160	97	27	0	78.23	2.83e-22	22	16	GSBRNA2T00026823001:promoter
chrA01	14586200	14586700	500	hypo	0	105	89	60	0	59.73	3.3e-13	13	13	GSBRNA2T00026824001:promoter
chrA01	14644100	14645600	1500	hypo	149	114	163	23	56.65	87.63	0.00322	26	21	GSBRNA2T00026834001:exon,GSBRNA2T00026834001:exon
chrA01	15068600	15069100	500	hypo	1	93	68	49	1.06	58.12	5.23e-11	10	13	GSBRNA2T00087691001:promoter,GSBRNA2T00087690001:promoter
chrA01	16160800	16161300	500	hypo	0	49	15	16	0	48.39	1.33e-05	6	5	GSBRNA2T00002627001:exon,GSBRNA2T00002627001:exon,GSBRNA2T00002627001:exon
chrA01	16492000	16492500	500	hypo	0	106	102	23	0	81.6	1.17e-16	9	15	GSBRNA2T00058541001:exon,GSBRNA2T00058541001:exon
chrA01	16564900	16565400	500	hypo	13	42	41	4	23.64	91.11	0.000226	6	8	GSBRNA2T00058531001:exon,GSBRNA2T00058531001:exon
chrA01	17168800	17170400	1600	hypo	137	158	254	10	46.44	96.21	6.58e-08	27	23	GSBRNA2T00068025001:promoter
chrA01	17168800	17170400	1600	hypo	137	158	254	10	46.44	96.21	6.58e-08	27	23	GSBRNA2T00068025001:promoter,GSBRNA2T00068025001:exon,GSBRNA2T00068025001:exon
chrA01	17238700	17239200	500	hypo	0	67	55	35	0	61.11	4.68e-09	5	6	GSBRNA2T00068011001:promoter
chrA01	18257400	18257900	500	hypo	0	47	101	99	0	50.5	2.43e-06	6	19	GSBRNA2T00096073001:promoter
chrA01	18359200	18359700	500	hypo	0	102	59	103	0	36.42	7.83e-09	13	21	GSBRNA2T00005604001:exon
chrA01	18388500	18389000	500	hypo	0	70	57	52	0	52.29	1.81e-08	8	11	GSBRNA2T00005599001:promoter
chrA01	18388500	18389000	500	hypo	0	70	57	52	0	52.29	1.81e-08	8	11	GSBRNA2T00005599001:promoter,GSBRNA2T00005599001:exon
chrA01	18591100	18591600	500	hypo	0	69	81	1	0	98.78	3.92e-13	9	9	GSBRNA2T00005568001:promoter
chrA01	18646500	18647000	500	hypo	0	38	36	4	0	90	2.91e-07	5	6	GSBRNA2T00005560001:promoter
chrA01	18646500	18647000	500	hypo	0	38	36	4	0	90	2.91e-07	5	6	GSBRNA2T00005560001:promoter,GSBRNA2T00005561001:exon
chrA01	19070900	19071400	500	hypo	9	31	35	5	22.5	87.5	0.00128	5	5	GSBRNA2T00057601001:promoter
chrA01	19483800	19484300	500	hypo	0	101	55	4	0	93.22	5.88e-16	10	8	GSBRNA2T00086360001:promoter
chrA01	19601800	19602300	500	hypo	0	50	60	5	0	92.31	1.51e-09	6	6	GSBRNA2T00010069001:exon
chrA01	19627400	19627900	500	hypo	4	126	49	40	3.08	55.06	1.29e-11	11	6	GSBRNA2T00010066001:promoter
chrA01	19627400	19627900	500	hypo	4	126	49	40	3.08	55.06	1.29e-11	11	6	GSBRNA2T00010066001:promoter,GSBRNA2T00010065001:exon
chrA01	20161300	20161800	500	hypo	2	35	58	3	5.41	95.08	1.12e-06	5	9	GSBRNA2T00009939001:exon,GSBRNA2T00009939001:exon
chrA01	20281100	20281600	500	hypo	42	56	51	3	42.86	94.44	0.00303	13	5	GSBRNA2T00067290001:promoter,GSBRNA2T00067289001:promoter,GSBRNA2T00067291001:promoter
chrA01	20281100	20281600	500	hypo	42	56	51	3	42.86	94.44	0.00303	13	5	GSBRNA2T00067290001:promoter,GSBRNA2T00067289001:promoter,GSBRNA2T00067291001:promoter,GSBRNA2T00067289001:exon
chrA01	20444600	20445100	500	hypo	0	88	82	99	0	45.3	2.19e-09	6	16	GSBRNA2T00067259001:promoter
chrA01	20590000	20590500	500	hypo	0	46	92	17	0	84.4	6.94e-09	5	7	GSBRNA2T00067225001:exon
chrA01	21413200	21413700	500	hypo	1	39	130	33	2.5	79.75	2.6e-07	5	9	GSBRNA2T00060233001:promoter
chrA01	21441200	21441700	500	hypo	0	40	33	51	0	39.29	0.000157	5	7	GSBRNA2T00072925001:promoter
chrA01	21441200	21441700	500	hypo	0	40	33	51	0	39.29	0.000157	5	7	GSBRNA2T00072925001:promoter,GSBRNA2T00072925001:exon
chrA01	21463100	21463600	500	hypo	0	86	34	7	0	82.93	2.06e-12	9	6	GSBRNA2T00072920001:promoter
chrA01	21463100	21463600	500	hypo	0	86	34	7	0	82.93	2.06e-12	9	6	GSBRNA2T00072920001:promoter,GSBRNA2T00072919001:exon
chrA01	21484600	21485100	500	hypo	0	61	18	26	0	40.91	5.25e-06	8	6	GSBRNA2T00072916001:promoter
chrA01	21530600	21531100	500	hypo	5	100	91	133	4.76	40.62	1.47e-07	13	18	GSBRNA2T00072895001:promoter
chrA01	21543400	21543900	500	hypo	9	107	55	78	7.76	41.35	2.15e-06	11	11	GSBRNA2T00072893001:exon
chrA01	21668300	21668800	500	hypo	0	86	49	29	0	62.82	5.21e-11	8	10	GSBRNA2T00072862001:promoter
chrA01	21668300	21668800	500	hypo	0	86	49	29	0	62.82	5.21e-11	8	10	GSBRNA2T00072862001:promoter,GSBRNA2T00072861001:exon
chrA01	21723000	21723500	500	hypo	1	34	202	12	2.86	94.39	1.17e-07	6	15	GSBRNA2T00072841001:exon,GSBRNA2T00072841001:exon
chrA01	22787400	22788400	1000	hypo	11	174	336	100	5.95	77.06	4.89e-23	20	24	GSBRNA2T00015325001:promoter,GSBRNA2T00015324001:promoter
chrA01	22787400	22788400	1000	hypo	11	174	336	100	5.95	77.06	4.89e-23	20	24	GSBRNA2T00015325001:promoter,GSBRNA2T00015324001:promoter,GSBRNA2T00015324001:exon
chrA01	23008800	23009300	500	hypo	0	25	79	19	0	80.61	1.86e-05	5	15	GSBRNA2T00015362001:exon
chrA01_random	116200	116700	500	hypo	1	76	31	24	1.3	56.36	2.02e-08	9	7	GSBRNA2T00094003001:exon,GSBRNA2T00094003001:exon
chrA01_random	384600	385100	500	hypo	0	46	61	6	0	91.04	6.25e-09	5	9	GSBRNA2T00055555001:intron
chrA01_random	390900	391400	500	hypo	0	29	211	82	0	72.01	7.36e-06	5	15	GSBRNA2T00055558001:promoter
chrA01_random	880600	881600	1000	hypo	46	205	113	11	18.33	91.13	6.35e-16	17	12	GSBRNA2T00039539001:exon,GSBRNA2T00039539001:exon,GSBRNA2T00039539001:exon
chrA01_random	910400	911400	1000	hypo	79	116	169	12	40.51	93.37	8.3e-07	11	13	GSBRNA2T00096498001:promoter,GSBRNA2T00096499001:promoter
chrA01_random	939800	940300	500	hypo	11	34	48	11	24.44	81.36	0.00147	6	7	GSBRNA2T00096505001:exon
chrA01_random	1292700	1296400	3700	hypo	217	177	390	34	55.08	91.98	2.82e-06	37	37	GSBRNA2T00044117001:promoter,GSBRNA2T00044116001:promoter
chrA01_random	1292700	1296400	3700	hypo	217	177	390	34	55.08	91.98	2.82e-06	37	37	GSBRNA2T00044117001:promoter,GSBRNA2T00044116001:promoter,GSBRNA2T00044116001:exon
chrA02	237600	238100	500	hypo	15	39	40	6	27.78	86.96	0.00136	6	5	GSBRNA2T00143505001:exon
chrA02	524600	525100	500	hypo	42	72	88	3	36.84	96.7	3.09e-05	14	5	GSBRNA2T00143432001:promoter
chrA02	524600	525100	500	hypo	42	72	88	3	36.84	96.7	3.09e-05	14	5	GSBRNA2T00143432001:promoter,GSBRNA2T00143432001:exon
chrA02	692400	692900	500	hypo	0	34	96	7	0	93.2	1.28e-07	5	6	GSBRNA2T00143399001:promoter,GSBRNA2T00143397001:promoter
chrA02	835100	835600	500	hypo	22	74	71	3	22.92	95.95	3.13e-07	13	5	GSBRNA2T00143360001:promoter
chrA02	1155500	1156000	500	hypo	25	37	132	8	40.32	94.29	0.0012	11	12	GSBRNA2T00143272001:exon
chrA02	1256000	1256500	500	hypo	0	59	72	82	0	46.75	5.3e-07	6	15	GSBRNA2T00143243001:promoter,GSBRNA2T00143245001:promoter
chrA02	1256000	1256500	500	hypo	0	59	72	82	0	46.75	5.3e-07	6	15	GSBRNA2T00143243001:promoter,GSBRNA2T00143245001:promoter,GSBRNA2T00143244001:exon
chrA02	1327900	1328400	500	hypo	1	29	132	10	3.33	92.96	1.72e-06	5	11	GSBRNA2T00143220001:exon,GSBRNA2T00143220001:exon
chrA02	1336700	1337200	500	hypo	0	71	57	56	0	50.44	2.35e-08	7	10	GSBRNA2T00143217001:promoter
chrA02	1761400	1761900	500	hypo	10	62	75	47	13.89	61.48	1.89e-05	9	12	GSBRNA2T00143121001:promoter
chrA02	1761400	1761900	500	hypo	10	62	75	47	13.89	61.48	1.89e-05	9	12	GSBRNA2T00143121001:promoter,GSBRNA2T00143120001:exon
chrA02	1763700	1764200	500	hypo	0	49	43	3	0	93.48	4.51e-09	5	6	GSBRNA2T00143120001:promoter,GSBRNA2T00143118001:promoter
chrA02	1947300	1947800	500	hypo	0	58	103	28	0	78.63	3.38e-10	6	12	GSBRNA2T00081088001:exon
chrA02	2249300	2250300	1000	hypo	6	243	401	72	2.41	84.78	3.67e-37	15	20	GSBRNA2T00081345001:exon,GSBRNA2T00081345001:exon
chrA02	2796700	2797200	500	hypo	34	47	48	6	41.98	88.89	0.00799	5	5	GSBRNA2T00001411001:promoter
chrA02	3111300	3111800	500	hypo	3	30	70	18	9.09	79.55	5.81e-05	6	12	GSBRNA2T00001476001:promoter
chrA02	3614600	3615100	500	hypo	64	64	59	1	50	98.33	0.0044	20	8	GSBRNA2T00052743001:exon
chrA02	3742500	3743000	500	hypo	10	33	35	4	23.26	89.74	0.000957	5	6	GSBRNA2T00052778001:promoter
chrA02	3742500	3743000	500	hypo	10	33	35	4	23.26	89.74	0.000957	5	6	GSBRNA2T00052778001:promoter,GSBRNA2T00052777001:exon
chrA02	3745200	3746200	1000	hypo	49	56	287	37	46.67	88.58	0.000708	15	21	GSBRNA2T00052779001:promoter
chrA02	3745200	3746200	1000	hypo	49	56	287	37	46.67	88.58	0.000708	15	21	GSBRNA2T00052779001:promoter,GSBRNA2T00052778001:exon,GSBRNA2T00052778001:exon
chrA02	3746200	3746700	500	hypo	4	79	93	22	4.82	80.87	2.27e-11	11	7	GSBRNA2T00052779001:promoter
chrA02	3915500	3916000	500	hypo	0	45	42	0	0	100	7.65e-09	6	6	GSBRNA2T00088541001:exon
chrA02	3943800	3944300	500	hypo	0	29	44	8	0	84.62	5.93e-06	5	7	GSBRNA2T00088538001:promoter
chrA02	4820100	4820600	500	hypo	1	43	58	29	2.27	66.67	1.71e-06	5	9	GSBRNA2T00041413001:promoter
chrA02	5135100	5136100	1000	hypo	13	87	152	12	13	92.68	6.75e-12	11	15	GSBRNA2T00041482001:promoter
chrA02	5686400	5686900	500	hypo	68	71	99	15	48.92	86.84	0.00433	16	11	GSBRNA2T00036893001:promoter
chrA02	5908400	5909400	1000	hypo	113	236	216	50	32.38	81.2	5.35e-11	23	22	GSBRNA2T00019883001:exon
chrA02	6001500	6002000	500	hypo	12	82	31	28	12.77	52.54	9.69e-05	13	9	GSBRNA2T00090868001:promoter
chrA02	6136300	6136800	500	hypo	25	34	67	2	42.37	97.1	0.00438	10	10	GSBRNA2T00090900001:promoter
chrA02	6136300	6136800	500	hypo	25	34	67	2	42.37	97.1	0.00438	10	10	GSBRNA2T00090900001:promoter,GSBRNA2T00090900001:exon,GSBRNA2T00090900001:exon
chrA02	6210400	6210900	500	hypo	0	67	63	26	0	70.79	4.27e-10	7	7	GSBRNA2T00090914001:promoter
chrA02	6678500	6679000	500	hypo	3	29	25	1	9.38	96.15	8.4e-05	6	5	GSBRNA2T00091000001:exon
chrA02	6830800	6831300	500	hypo	0	63	16	21	0	43.24	2.64e-06	9	6	GSBRNA2T00070099001:promoter
chrA02	6830800	6831300	500	hypo	0	63	16	21	0	43.24	2.64e-06	9	6	GSBRNA2T00070099001:promoter,GSBRNA2T00070100001:exon
chrA02	7605700	7606200	500	hypo	27	116	111	36	18.88	75.51	4.15e-09	12	11	GSBRNA2T00081054001:promoter
chrA02	7966900	7967900	1000	hypo	64	145	221	60	30.62	78.65	1.38e-08	19	19	GSBRNA2T00082778001:promoter
chrA02	8018800	8019300	500	hypo	0	60	65	73	0	47.1	4.38e-07	8	18	GSBRNA2T00079483001:exon
chrA02	8642700	8645300	2600	hypo	58	220	488	104	20.86	82.43	4.16e-20	30	50	GSBRNA2T00116551001:promoter
chrA02	8651000	8651500	500	hypo	2	72	53	36	2.7	59.55	1.91e-08	6	7	GSBRNA2T00116548001:promoter
chrA02	8651000	8651500	500	hypo	2	72	53	36	2.7	59.55	1.91e-08	6	7	GSBRNA2T00116548001:promoter,GSBRNA2T00116549001:exon,GSBRNA2T00116549001:exon
chrA02	8786100	8786600	500	hypo	0	81	53	52	0	50.48	3.45e-09	6	14	GSBRNA2T00116514001:promoter
chrA02	8835300	8837000	1700	hypo	43	232	217	36	15.64	85.77	1.15e-21	20	22	GSBRNA2T00116507001:promoter
chrA02	9450500	9451000	500	hypo	0	156	79	27	0	74.53	1.26e-20	15	10	GSBRNA2T00116409001:promoter
chrA02	10328000	10328500	500	hypo	11	24	61	1	31.43	98.39	0.00266	6	7	GSBRNA2T00067166001:exon,GSBRNA2T00067166001:exon
chrA02	10986600	10987100	500	hypo	0	49	48	3	0	94.12	3.04e-09	6	6	GSBRNA2T00083088001:promoter
chrA02	11217400	11217900	500	hypo	0	29	56	3	0	94.92	1.53e-06	5	6	GSBRNA2T00065763001:promoter
chrA02	11217400	11217900	500	hypo	0	29	56	3	0	94.92	1.53e-06	5	6	GSBRNA2T00065763001:promoter,GSBRNA2T00065763001:exon
chrA02	11835400	11835900	500	hypo	1	37	29	2	2.63	93.55	1.29e-06	6	6	GSBRNA2T00036569001:promoter
chrA02	11898600	11899600	1000	hypo	4	181	109	7	2.16	93.97	5.65e-26	18	12	GSBRNA2T00036589001:promoter
chrA02	11898600	11899600	1000	hypo	4	181	109	7	2.16	93.97	5.65e-26	18	12	GSBRNA2T00036589001:promoter,GSBRNA2T00036589001:exon
chrA02	13110800	13111300	500	hypo	0	209	77	66	0	53.85	3.66e-21	12	12	GSBRNA2T00104333001:promoter
chrA02	13110800	13111300	500	hypo	0	209	77	66	0	53.85	3.66e-21	12	12	GSBRNA2T00104333001:promoter,GSBRNA2T00104333001:exon,GSBRNA2T00104333001:exon
chrA02	13321700	13322200	500	hypo	0	66	54	10	0	84.38	6.22e-11	7	10	GSBRNA2T00104371001:exon
chrA02	13452300	13453300	1000	hypo	347	306	889	92	53.14	90.62	3.62e-11	33	32	GSBRNA2T00104390001:promoter
chrA02	13453300	13453800	500	hypo	9	86	99	12	9.47	89.19	1.4e-11	10	10	GSBRNA2T00104390001:promoter
chrA02	13460700	13461200	500	hypo	0	40	54	1	0	98.18	2.48e-08	6	9	GSBRNA2T00104392001:exon
chrA02	13853800	13854300	500	hypo	25	78	76	23	24.27	76.77	1.31e-05	8	7	GSBRNA2T00087452001:intron
chrA02	13979600	13980600	1000	hypo	10	208	253	15	4.59	94.4	2.17e-31	15	15	GSBRNA2T00087434001:exon,GSBRNA2T00087434001:exon
chrA02	14232700	14233200	500	hypo	7	71	30	11	8.97	73.17	6.55e-07	8	6	GSBRNA2T00029328001:exon,GSBRNA2T00029328001:exon
chrA02	14793500	14794000	500	hypo	7	23	78	8	23.33	90.7	0.00144	5	9	GSBRNA2T00084790001:promoter
chrA02	15094800	15095300	500	hypo	4	42	49	26	8.7	65.33	4.36e-05	7	6	GSBRNA2T00084832001:intron
chrA02	15106800	15107300	500	hypo	13	31	110	4	29.55	96.49	0.000352	7	6	GSBRNA2T00084834001:promoter
chrA02	15156400	15156900	500	hypo	0	57	21	40	0	34.43	3.37e-05	6	7	GSBRNA2T00084843001:promoter
chrA02	15172900	15173900	1000	hypo	1	165	214	14	0.6	93.86	3.22e-28	16	20	GSBRNA2T00084846001:promoter
chrA02	15337500	15338000	500	hypo	2	56	38	1	3.45	97.44	4.17e-09	9	5	GSBRNA2T00084874001:promoter
chrA02	15337500	15338000	500	hypo	2	56	38	1	3.45	97.44	4.17e-09	9	5	GSBRNA2T00084874001:promoter,GSBRNA2T00084874001:exon
chrA02	15349100	15349600	500	hypo	0	72	15	19	0	44.12	5.28e-07	10	6	GSBRNA2T00084878001:exon
chrA02	16851000	16851500	500	hypo	4	65	66	40	5.8	62.26	1.86e-07	9	12	GSBRNA2T00072526001:exon,GSBRNA2T00072526001:exon,GSBRNA2T00072526001:exon
chrA02	17010000	17010500	500	hypo	0	96	116	22	0	84.06	5.59e-16	11	16	GSBRNA2T00035171001:promoter
chrA02	17038100	17038600	500	hypo	0	39	37	9	0	80.43	5.87e-07	5	8	GSBRNA2T00035165001:promoter
chrA02	17158500	17159000	500	hypo	0	51	36	72	0	33.33	7.67e-05	6	8	GSBRNA2T00035146001:promoter
chrA02	17240300	17240800	500	hypo	0	29	56	2	0	96.55	1.31e-06	5	9	GSBRNA2T00035140001:exon
chrA02	17266000	17266500	500	hypo	0	28	39	5	0	88.64	6.68e-06	5	6	GSBRNA2T00035131001:exon
chrA02	17268300	17269300	1000	hypo	11	129	293	15	7.86	95.13	1.66e-20	14	25	GSBRNA2T00035131001:exon,GSBRNA2T00035131001:exon
chrA02	17638600	17639100	500	hypo	0	49	23	7	0	76.67	1.61e-07	7	5	GSBRNA2T00091704001:promoter
chrA02	17638600	17639100	500	hypo	0	49	23	7	0	76.67	1.61e-07	7	5	GSBRNA2T00091704001:promoter,GSBRNA2T00091704001:exon
chrA02	17711300	17711800	500	hypo	0	34	52	6	0	89.66	5.28e-07	5	8	GSBRNA2T00079336001:promoter
chrA02	17849900	17850400	500	hypo	1	58	12	29	1.69	29.27	0.000488	7	5	GSBRNA2T00079357001:intron
chrA02	17928100	17928600	500	hypo	0	43	46	35	0	56.79	3.82e-06	5	11	GSBRNA2T00079370001:promoter
chrA02	17928100	17928600	500	hypo	0	43	46	35	0	56.79	3.82e-06	5	11	GSBRNA2T00079370001:promoter,GSBRNA2T00079370001:exon,GSBRNA2T00079370001:exon,GSBRNA2T00079370001:exon
chrA02	17929400	17929900	500	hypo	0	53	29	2	0	93.55	4.35e-09	7	5	GSBRNA2T00079370001:promoter
chrA02	17929400	17929900	500	hypo	0	53	29	2	0	93.55	4.35e-09	7	5	GSBRNA2T00079370001:promoter,GSBRNA2T00079371001:exon
chrA02	17993200	17994200	1000	hypo	15	80	134	10	15.79	93.06	2.8e-10	13	16	GSBRNA2T00063398001:exon,GSBRNA2T00063398001:exon,GSBRNA2T00063398001:exon
chrA02	17994200	17994700	500	hypo	0	78	55	28	0	66.27	1.06e-10	9	9	GSBRNA2T00063398001:promoter
chrA02	17994200	17994700	500	hypo	0	78	55	28	0	66.27	1.06e-10	9	9	GSBRNA2T00063398001:promoter,GSBRNA2T00063398001:exon,GSBRNA2T00063398001:exon
chrA02	18408600	18409600	1000	hypo	13	173	129	12	6.99	91.49	7.37e-22	16	15	GSBRNA2T00041685001:promoter
chrA02	18466500	18467000	500	hypo	0	51	51	5	0	91.07	2.08e-09	6	8	GSBRNA2T00041674001:promoter
chrA02	18861300	18861800	500	hypo	0	29	35	72	0	32.71	0.00272	5	12	GSBRNA2T00030933001:exon
chrA02	19079500	19080500	1000	hypo	140	195	346	47	41.79	88.04	1.74e-09	31	41	GSBRNA2T00030897001:promoter
chrA02	19079500	19080500	1000	hypo	140	195	346	47	41.79	88.04	1.74e-09	31	41	GSBRNA2T00030897001:promoter,GSBRNA2T00030897001:exon,GSBRNA2T00030897001:exon
chrA02	19089400	19089900	500	hypo	6	81	31	66	6.9	31.96	0.000478	7	7	GSBRNA2T00030893001:exon,GSBRNA2T00030893001:exon
chrA02	19429800	19430300	500	hypo	38	47	62	6	44.71	91.18	0.00631	10	7	GSBRNA2T00030849001:intron
chrA02	19661900	19662400	500	hypo	3	42	60	24	6.67	71.43	6.02e-06	6	7	GSBRNA2T00030805001:promoter
chrA02	19661900	19662400	500	hypo	3	42	60	24	6.67	71.43	6.02e-06	6	7	GSBRNA2T00030805001:promoter,GSBRNA2T00030805001:exon
chrA02	19910600	19911100	500	hypo	0	47	26	22	0	54.17	4.51e-06	8	5	GSBRNA2T00069578001:promoter
chrA02	19965000	19965500	500	hypo	6	97	222	15	5.83	93.67	2.28e-16	13	13	GSBRNA2T00069590001:promoter
chrA02	19965000	19965500	500	hypo	6	97	222	15	5.83	93.67	2.28e-16	13	13	GSBRNA2T00069590001:promoter,GSBRNA2T00069590001:exon
chrA02	19984200	19984700	500	hypo	9	29	34	2	23.68	94.44	0.00121	6	5	GSBRNA2T00069592001:promoter
chrA02	21285600	21286100	500	hypo	19	32	50	4	37.25	92.59	0.00564	7	5	GSBRNA2T00093766001:exon
chrA02	21539900	21540400	500	hypo	0	61	43	6	0	87.76	3.03e-10	5	6	GSBRNA2T00080116001:promoter
chrA02	21619500	21620000	500	hypo	8	133	35	30	5.67	53.85	1.33e-09	14	8	GSBRNA2T00080089001:exon,GSBRNA2T00080089001:exon
chrA02	21752500	21753000	500	hypo	1	26	26	24	3.7	52	0.00157	5	6	GSBRNA2T00080050001:promoter
chrA02	21752500	21753000	500	hypo	1	26	26	24	3.7	52	0.00157	5	6	GSBRNA2T00080050001:promoter,GSBRNA2T00080050001:exon
chrA02	21907100	21907600	500	hypo	0	47	45	2	0	95.74	5.53e-09	7	6	GSBRNA2T00098113001:promoter
chrA02	22369300	22369800	500	hypo	42	103	108	66	28.97	62.07	0.000317	14	14	GSBRNA2T00055394001:promoter
chrA02	23560600	23561100	500	hypo	0	28	149	92	0	61.83	4.56e-05	5	28	GSBRNA2T00086448001:promoter
chrA02	23718500	23719000	500	hypo	18	63	113	59	22.22	65.7	0.000104	6	16	GSBRNA2T00046021001:exon
chrA02	24252600	24253100	500	hypo	10	47	36	21	17.54	63.16	0.00104	6	6	GSBRNA2T00047541001:promoter
chrA02	24485200	24485700	500	hypo	0	32	39	54	0	41.94	0.000428	5	10	GSBRNA2T00047479001:promoter,GSBRNA2T00047481001:promoter
chrA02	24485200	24485700	500	hypo	0	32	39	54	0	41.94	0.000428	5	10	GSBRNA2T00047479001:promoter,GSBRNA2T00047481001:promoter,GSBRNA2T00047480001:exon
chrA02	24527700	24528200	500	hypo	0	31	55	33	0	62.5	2.98e-05	5	8	GSBRNA2T00047471001:exon
chrA02_random	951800	952300	500	hypo	2	40	24	37	4.76	39.34	0.00147	7	8	GSBRNA2T00012057001:exon
chrA02_random	1050300	1050800	500	hypo	3	54	98	7	5.26	93.33	1.4e-09	7	10	GSBRNA2T00011744001:promoter
chrA02_random	1162700	1163200	500	hypo	15	52	234	94	22.39	71.34	5.01e-05	9	37	GSBRNA2T00081481001:exon,GSBRNA2T00081481001:exon
chrA02_random	1375500	1376500	1000	hypo	46	280	369	27	14.11	93.18	4.53e-32	23	21	GSBRNA2T00027399001:promoter
chrA02_random	1375500	1376500	1000	hypo	46	280	369	27	14.11	93.18	4.53e-32	23	21	GSBRNA2T00027399001:promoter,GSBRNA2T00027399001:exon,GSBRNA2T00027399001:exon
chrA03	785800	786300	500	hypo	0	100	25	30	0	45.45	1.7e-09	12	6	GSBRNA2T00049371001:exon,GSBRNA2T00049371001:exon
chrA03	1044800	1045800	1000	hypo	2	110	109	100	1.79	52.15	9.21e-12	18	22	GSBRNA2T00129669001:promoter
chrA03	1044800	1045800	1000	hypo	2	110	109	100	1.79	52.15	9.21e-12	18	22	GSBRNA2T00129669001:promoter,GSBRNA2T00129670001:exon,GSBRNA2T00129670001:exon,GSBRNA2T00129670001:exon,GSBRNA2T00129670001:exon
chrA03	2608100	2608600	500	hypo	3	38	69	24	7.32	74.19	1.02e-05	5	10	GSBRNA2T00130083001:promoter,GSBRNA2T00130085001:promoter
chrA03	2704400	2704900	500	hypo	4	50	15	12	7.41	55.56	0.000288	8	5	GSBRNA2T00130105001:exon,GSBRNA2T00130105001:exon
chrA03	2851800	2852300	500	hypo	5	38	56	44	11.63	56	0.000746	7	8	GSBRNA2T00130154001:promoter
chrA03	2851800	2852300	500	hypo	5	38	56	44	11.63	56	0.000746	7	8	GSBRNA2T00130154001:promoter,GSBRNA2T00130155001:exon
chrA03	2854200	2854700	500	hypo	2	24	58	19	7.69	75.32	0.000348	5	9	GSBRNA2T00130155001:promoter,GSBRNA2T00130156001:promoter
chrA03	2854200	2854700	500	hypo	2	24	58	19	7.69	75.32	0.000348	5	9	GSBRNA2T00130155001:promoter,GSBRNA2T00130156001:promoter,GSBRNA2T00130156001:exon
chrA03	3022600	3023100	500	hypo	0	36	52	21	0	71.23	2.56e-06	5	9	GSBRNA2T00130201001:promoter,GSBRNA2T00130203001:promoter
chrA03	3478800	3479300	500	hypo	57	106	88	6	34.97	93.62	3.1e-06	11	6	GSBRNA2T00148949001:intron
chrA03	4588500	4589000	500	hypo	0	28	56	37	0	60.22	8.73e-05	5	11	GSBRNA2T00148665001:promoter
chrA03	4588500	4589000	500	hypo	0	28	56	37	0	60.22	8.73e-05	5	11	GSBRNA2T00148665001:promoter,GSBRNA2T00148666001:exon,GSBRNA2T00148666001:exon
chrA03	4589400	4590400	1000	hypo	43	98	118	41	30.5	74.21	2.22e-05	16	18	GSBRNA2T00148665001:promoter
chrA03	4589400	4590400	1000	hypo	43	98	118	41	30.5	74.21	2.22e-05	16	18	GSBRNA2T00148665001:promoter,GSBRNA2T00148665001:exon,GSBRNA2T00148665001:exon
chrA03	5158600	5159100	500	hypo	28	35	108	12	44.44	90	0.00679	6	6	GSBRNA2T00062556001:promoter
chrA03	5958600	5959100	500	hypo	0	94	22	41	0	34.92	1.39e-07	16	8	GSBRNA2T00066710001:promoter
chrA03	5958600	5959100	500	hypo	0	94	22	41	0	34.92	1.39e-07	16	8	GSBRNA2T00066710001:promoter,GSBRNA2T00066708001:exon
chrA03	6367700	6368200	500	hypo	24	79	84	35	23.3	70.59	2.29e-05	9	11	GSBRNA2T00142155001:promoter
chrA03	6510700	6511200	500	hypo	11	28	26	1	28.21	96.3	0.00423	6	5	GSBRNA2T00142113001:promoter
chrA03	6512800	6513300	500	hypo	9	69	79	19	11.54	80.61	2.77e-08	10	8	GSBRNA2T00142111001:promoter
chrA03	6512800	6513300	500	hypo	9	69	79	19	11.54	80.61	2.77e-08	10	8	GSBRNA2T00142111001:promoter,GSBRNA2T00142113001:exon,GSBRNA2T00142113001:exon
chrA03	6647000	6647500	500	hypo	7	30	130	17	18.92	88.44	0.000111	6	16	GSBRNA2T00142082001:promoter
chrA03	7485400	7485900	500	hypo	0	72	62	1	0	98.41	5.24e-13	7	5	GSBRNA2T00141885001:promoter
chrA03	8255700	8256200	500	hypo	0	31	25	25	0	50	0.000236	5	7	GSBRNA2T00124881001:exon
chrA03	9354800	9355300	500	hypo	49	82	50	1	37.4	98.04	0.000175	16	5	GSBRNA2T00058369001:promoter
chrA03	9794800	9795300	500	hypo	5	63	64	26	7.35	71.11	1.09e-07	6	8	GSBRNA2T00139018001:promoter
chrA03	10116400	10116900	500	hypo	0	25	99	33	0	75	2.92e-05	5	11	GSBRNA2T00138941001:promoter
chrA03	10116400	10116900	500	hypo	0	25	99	33	0	75	2.92e-05	5	11	GSBRNA2T00138941001:promoter,GSBRNA2T00138942001:exon
chrA03	10118100	10118600	500	hypo	11	29	85	25	27.5	77.27	0.0041	6	10	GSBRNA2T00138941001:promoter
chrA03	10596000	10596500	500	hypo	2	41	29	1	4.65	96.67	7.87e-07	8	6	GSBRNA2T00138828001:promoter
chrA03	10596000	10596500	500	hypo	2	41	29	1	4.65	96.67	7.87e-07	8	6	GSBRNA2T00138828001:promoter,GSBRNA2T00138827001:exon
chrA03	10654900	10655400	500	hypo	0	40	54	56	0	49.09	2.31e-05	5	11	GSBRNA2T00138813001:exon
chrA03	10894600	10895100	500	hypo	0	50	18	61	0	22.78	0.00115	6	7	GSBRNA2T00138764001:promoter
chrA03	10894600	10895100	500	hypo	0	50	18	61	0	22.78	0.00115	6	7	GSBRNA2T00138764001:promoter,GSBRNA2T00138765001:exon
chrA03	10895600	10896100	500	hypo	0	28	52	11	0	82.54	8.18e-06	5	10	GSBRNA2T00138764001:promoter
chrA03	10930600	10931600	1000	hypo	1	85	230	14	1.16	94.26	1.55e-16	14	27	GSBRNA2T00138754001:promoter
chrA03	11228000	11229000	1000	hypo	184	129	537	39	58.79	93.23	2.86e-05	29	37	GSBRNA2T00138688001:promoter
chrA03	11675600	11676100	500	hypo	12	23	54	5	34.29	91.53	0.0092	6	6	GSBRNA2T00151441001:promoter
chrA03	11838900	11839400	500	hypo	0	113	35	11	0	76.09	1.18e-14	20	7	GSBRNA2T00151476001:promoter
chrA03	11838900	11839400	500	hypo	0	113	35	11	0	76.09	1.18e-14	20	7	GSBRNA2T00151476001:promoter,GSBRNA2T00151476001:exon
chrA03	11877300	11877800	500	hypo	0	75	66	14	0	82.5	3.58e-12	11	7	GSBRNA2T00151482001:promoter
chrA03	11877300	11877800	500	hypo	0	75	66	14	0	82.5	3.58e-12	11	7	GSBRNA2T00151482001:promoter,GSBRNA2T00151482001:exon
chrA03	11961400	11961900	500	hypo	0	117	25	72	0	25.77	2.28e-07	12	10	GSBRNA2T00151505001:exon
chrA03	12197900	12198400	500	hypo	2	39	80	12	4.88	86.96	4.31e-07	6	6	GSBRNA2T00151556001:exon
chrA03	13347100	13347600	500	hypo	21	34	39	1	38.18	97.5	0.00548	7	5	GSBRNA2T00112147001:promoter,GSBRNA2T00112146001:promoter
chrA03	13680100	13680600	500	hypo	61	76	65	15	44.53	81.25	0.0078	13	7	GSBRNA2T00112041001:promoter,GSBRNA2T00112040001:promoter
chrA03	13680100	13680600	500	hypo	61	76	65	15	44.53	81.25	0.0078	13	7	GSBRNA2T00112041001:promoter,GSBRNA2T00112040001:promoter,GSBRNA2T00112042001:exon,GSBRNA2T00112042001:exon,GSBRNA2T00112041001:exon
chrA03	14828500	14829000	500	hypo	13	70	158	53	15.66	74.88	1.16e-07	9	23	GSBRNA2T00111721001:promoter,GSBRNA2T00111723001:promoter
chrA03	14828500	14829000	500	hypo	13	70	158	53	15.66	74.88	1.16e-07	9	23	GSBRNA2T00111721001:promoter,GSBRNA2T00111723001:promoter,GSBRNA2T00111722001:exon
chrA03	14832300	14832800	500	hypo	0	25	127	6	0	95.49	2.69e-06	5	7	GSBRNA2T00111720001:exon
chrA03	15095000	15095500	500	hypo	59	83	31	0	41.55	100	0.00274	24	6	GSBRNA2T00111652001:promoter,GSBRNA2T00111650001:promoter,GSBRNA2T00111649001:promoter,GSBRNA2T00111651001:promoter
chrA03	15095000	15095500	500	hypo	59	83	31	0	41.55	100	0.00274	24	6	GSBRNA2T00111652001:promoter,GSBRNA2T00111650001:promoter,GSBRNA2T00111649001:promoter,GSBRNA2T00111651001:promoter,GSBRNA2T00111650001:exon
chrA03	15279100	15279600	500	hypo	0	45	33	33	0	50	1.03e-05	7	11	GSBRNA2T00111596001:promoter
chrA03	15293500	15294500	1000	hypo	29	269	114	75	9.73	60.32	7.37e-18	23	22	GSBRNA2T00111591001:exon
chrA03	15415300	15415800	500	hypo	0	49	39	8	0	82.98	2.27e-08	5	7	GSBRNA2T00111561001:promoter
chrA03	15415300	15415800	500	hypo	0	49	39	8	0	82.98	2.27e-08	5	7	GSBRNA2T00111561001:promoter,GSBRNA2T00111561001:exon
chrA03	16265700	16266200	500	hypo	29	51	47	3	36.25	94	0.00118	5	5	GSBRNA2T00137602001:promoter
chrA03	16350400	16350900	500	hypo	0	63	41	39	0	51.25	1.6e-07	8	11	GSBRNA2T00137582001:promoter
chrA03	16398600	16399100	500	hypo	47	81	75	30	36.72	71.43	0.00331	14	15	GSBRNA2T00137568001:exon
chrA03	16695400	16695900	500	hypo	117	100	96	3	53.92	96.97	0.00131	18	10	GSBRNA2T00137518001:promoter
chrA03	16695400	16695900	500	hypo	117	100	96	3	53.92	96.97	0.00131	18	10	GSBRNA2T00137518001:promoter,GSBRNA2T00137518001:exon
chrA03	17135700	17136200	500	hypo	0	46	95	6	0	94.06	1.37e-09	6	12	GSBRNA2T00137426001:promoter
chrA03	17258600	17259100	500	hypo	0	30	28	10	0	73.68	2.25e-05	6	7	GSBRNA2T00137391001:promoter
chrA03	17258600	17259100	500	hypo	0	30	28	10	0	73.68	2.25e-05	6	7	GSBRNA2T00137391001:promoter,GSBRNA2T00137391001:exon
chrA03	17285000	17285500	500	hypo	0	42	68	42	0	61.82	1.44e-06	6	16	GSBRNA2T00137385001:promoter
chrA03	17382900	17383400	500	hypo	0	52	61	31	0	66.3	5.55e-08	5	7	GSBRNA2T00137364001:promoter
chrA03	17383900	17384400	500	hypo	0	74	134	18	0	88.16	1.07e-13	5	6	GSBRNA2T00137364001:promoter
chrA03	17383900	17384400	500	hypo	0	74	134	18	0	88.16	1.07e-13	5	6	GSBRNA2T00137364001:promoter,GSBRNA2T00137364001:exon
chrA03	17427300	17427800	500	hypo	1	50	112	55	1.96	67.07	9.48e-08	5	18	GSBRNA2T00137354001:promoter
chrA03	17507500	17508000	500	hypo	0	35	38	7	0	84.44	1.16e-06	5	6	GSBRNA2T00137337001:promoter
chrA03	18023700	18024200	500	hypo	0	74	48	3	0	94.12	1.83e-12	9	5	GSBRNA2T00154814001:promoter
chrA03	18180200	18181200	1000	hypo	0	101	115	61	0	65.34	5.66e-14	13	12	GSBRNA2T00154848001:promoter
chrA03	18180200	18181200	1000	hypo	0	101	115	61	0	65.34	5.66e-14	13	12	GSBRNA2T00154848001:promoter,GSBRNA2T00154848001:exon
chrA03	18389400	18389900	500	hypo	0	160	48	98	0	32.88	1.31e-11	14	13	GSBRNA2T00154882001:exon,GSBRNA2T00154882001:exon
chrA03	18615300	18615800	500	hypo	38	109	143	32	25.85	81.71	3.71e-08	15	13	GSBRNA2T00154924001:promoter,GSBRNA2T00154923001:promoter
chrA03	18777900	18778400	500	hypo	0	48	44	29	0	60.27	7e-07	5	7	GSBRNA2T00154956001:promoter
chrA03	18822700	18823700	1000	hypo	151	177	687	124	46.04	84.71	3.25e-08	19	19	GSBRNA2T00154970001:promoter
chrA03	18822700	18823700	1000	hypo	151	177	687	124	46.04	84.71	3.25e-08	19	19	GSBRNA2T00154970001:promoter,GSBRNA2T00154970001:exon,GSBRNA2T00154970001:exon
chrA03	18853600	18854100	500	hypo	0	71	25	54	0	31.65	8.11e-06	8	8	GSBRNA2T00154981001:promoter,GSBRNA2T00154980001:promoter,GSBRNA2T00154979001:promoter
chrA03	18860900	18861400	500	hypo	0	47	108	26	0	80.6	7.16e-09	7	9	GSBRNA2T00154982001:exon
chrA03	19347500	19348000	500	hypo	32	82	31	6	28.07	83.78	0.000404	14	6	GSBRNA2T00113709001:exon,GSBRNA2T00113709001:exon
chrA03	20300000	20300500	500	hypo	50	81	73	3	38.17	96.05	6.46e-05	10	6	GSBRNA2T00113492001:promoter
chrA03	20361000	20361500	500	hypo	0	123	49	78	0	38.58	1.56e-10	9	9	GSBRNA2T00113477001:promoter
chrA03	20737100	20738600	1500	hypo	172	108	198	23	61.43	89.59	0.00605	19	21	GSBRNA2T00151286001:promoter
chrA03	20861300	20861800	500	hypo	5	28	26	4	15.15	86.67	0.00076	5	5	GSBRNA2T00151271001:promoter
chrA03	21039900	21040400	500	hypo	0	60	21	70	0	23.08	0.000344	6	7	GSBRNA2T00151229001:promoter
chrA03	21134500	21135000	500	hypo	32	66	69	28	32.65	71.13	0.00227	9	7	GSBRNA2T00151208001:promoter
chrA03	22249000	22249500	500	hypo	5	35	51	10	12.5	83.61	4.67e-05	5	7	GSBRNA2T00106664001:promoter,GSBRNA2T00106663001:promoter
chrA03	22552600	22553100	500	hypo	1	122	63	2	0.81	96.92	1.08e-18	16	5	GSBRNA2T00106714001:promoter
chrA03	23189800	23190300	500	hypo	0	26	41	2	0	95.35	6.86e-06	5	7	GSBRNA2T00106852001:promoter
chrA03	23211600	23212100	500	hypo	0	45	72	3	0	96	2.88e-09	6	7	GSBRNA2T00106856001:promoter,GSBRNA2T00106857001:promoter
chrA03	23211600	23212100	500	hypo	0	45	72	3	0	96	2.88e-09	6	7	GSBRNA2T00106856001:promoter,GSBRNA2T00106857001:promoter,GSBRNA2T00106857001:exon
chrA03	23312400	23313400	1000	hypo	48	305	158	127	13.6	55.44	1.21e-15	28	17	GSBRNA2T00106876001:exon,GSBRNA2T00106876001:exon
chrA03	23629900	23630400	500	hypo	0	46	31	0	0	100	1.35e-08	5	6	GSBRNA2T00048889001:promoter,GSBRNA2T00048888001:promoter
chrA03	24450400	24450900	500	hypo	14	44	36	9	24.14	80	0.000999	5	7	GSBRNA2T00096117001:promoter
chrA03	24872000	24873000	1000	hypo	1	311	290	16	0.32	94.77	7.7e-50	25	18	GSBRNA2T00085962001:promoter,GSBRNA2T00085959001:promoter
chrA03	25581800	25582300	500	hypo	0	107	27	15	0	64.29	2.03e-12	7	6	GSBRNA2T00044824001:promoter,GSBRNA2T00044826001:promoter
chrA03	25581800	25582300	500	hypo	0	107	27	15	0	64.29	2.03e-12	7	6	GSBRNA2T00044824001:promoter,GSBRNA2T00044826001:promoter,GSBRNA2T00044826001:exon
chrA03	25952400	25952900	500	hypo	5	30	43	3	14.29	93.48	9.93e-05	5	7	GSBRNA2T00067406001:promoter
chrA03	25952400	25952900	500	hypo	5	30	43	3	14.29	93.48	9.93e-05	5	7	GSBRNA2T00067406001:promoter,GSBRNA2T00067405001:exon,GSBRNA2T00067405001:exon
chrA03	26372900	26373400	500	hypo	0	54	29	13	0	69.05	8.37e-08	8	6	GSBRNA2T00092678001:exon
chrA03	26382300	26382800	500	hypo	0	72	49	89	0	35.51	1.41e-06	11	21	GSBRNA2T00092680001:promoter
chrA03	26382300	26382800	500	hypo	0	72	49	89	0	35.51	1.41e-06	11	21	GSBRNA2T00092680001:promoter,GSBRNA2T00092680001:exon
chrA03	26922800	26923300	500	hypo	23	51	31	6	31.08	83.78	0.0032	9	7	GSBRNA2T00077754001:promoter
chrA03	26923400	26923900	500	hypo	0	61	57	22	0	72.15	2e-09	6	7	GSBRNA2T00077754001:promoter
chrA03	27686700	27687700	1000	hypo	48	79	159	42	37.8	79.1	0.000192	11	16	GSBRNA2T00081786001:exon
chrA03	27933500	27934000	500	hypo	0	81	31	46	0	40.26	1.34e-07	9	7	GSBRNA2T00071496001:exon
chrA03	28144200	28144700	500	hypo	5	66	39	18	7.04	68.42	3.73e-07	7	8	GSBRNA2T00075235001:exon
chrA03	28243400	28244800	1400	hypo	0	118	163	38	0	81.09	4.06e-19	14	17	GSBRNA2T00075251001:promoter
chrA03	28243400	28244800	1400	hypo	0	118	163	38	0	81.09	4.06e-19	14	17	GSBRNA2T00075251001:promoter,GSBRNA2T00075251001:exon,GSBRNA2T00075251001:exon,GSBRNA2T00075251001:exon,GSBRNA2T00075251001:exon,GSBRNA2T00075251001:exon
chrA03	28294100	28294600	500	hypo	7	38	85	4	15.56	95.51	5.17e-06	6	11	GSBRNA2T00075259001:promoter
chrA03	28666700	28667200	500	hypo	0	34	67	19	0	77.91	1.46e-06	5	8	GSBRNA2T00043295001:exon,GSBRNA2T00043295001:exon
chrA03	29280400	29281400	1000	hypo	4	75	176	14	5.06	92.63	3.81e-13	12	22	GSBRNA2T00050104001:promoter
chrA03	29293200	29294200	1000	hypo	71	115	180	14	38.17	92.78	2.34e-07	22	17	GSBRNA2T00050101001:promoter
chrA03	29501400	29501900	500	hypo	5	84	50	2	5.62	96.15	1.03e-11	11	6	GSBRNA2T00051621001:exon,GSBRNA2T00051621001:exon,GSBRNA2T00051621001:exon
chrA03_random	361300	361800	500	hypo	27	131	24	14	17.09	63.16	4.91e-05	12	5	GSBRNA2T00025295001:promoter
chrA03_random	1337000	1338000	1000	hypo	10	112	200	21	8.2	90.5	1.61e-16	13	14	GSBRNA2T00006703001:promoter
chrA03_random	1514700	1515200	500	hypo	49	63	176	43	43.75	80.37	0.00209	12	12	GSBRNA2T00076002001:promoter
chrA03_random	2124900	2125400	500	hypo	0	40	12	17	0	41.38	0.00021	6	5	GSBRNA2T00097784001:exon,GSBRNA2T00097784001:exon
chrA03_random	2216400	2216900	500	hypo	70	104	86	1	40.23	98.85	1.24e-05	15	12	GSBRNA2T00046961001:promoter
chrA03_random	4152300	4154200	1900	hypo	2	289	270	11	0.69	96.09	2.21e-46	31	30	GSBRNA2T00028662001:promoter,GSBRNA2T00028663001:promoter
chrA03_random	4152300	4154200	1900	hypo	2	289	270	11	0.69	96.09	2.21e-46	31	30	GSBRNA2T00028662001:promoter,GSBRNA2T00028663001:promoter,GSBRNA2T00028663001:exon
chrA03_random	4274900	4275400	500	hypo	0	52	85	17	0	83.33	1.39e-09	7	9	GSBRNA2T00028674001:exon
chrA04	273200	273700	500	hypo	0	49	43	62	0	40.95	1.98e-05	6	11	GSBRNA2T00149286001:promoter,GSBRNA2T00149287001:promoter
chrA04	496100	496600	500	hypo	4	47	95	17	7.84	84.82	1.51e-07	5	16	GSBRNA2T00149259001:promoter
chrA04	679000	679500	500	hypo	0	30	38	10	0	79.17	9e-06	5	7	GSBRNA2T00149214001:exon
chrA04	693400	693900	500	hypo	16	27	70	3	37.21	95.89	0.00432	7	6	GSBRNA2T00149208001:promoter
chrA04	967400	967900	500	hypo	54	55	97	14	49.54	87.39	0.00859	9	7	GSBRNA2T00149155001:promoter,GSBRNA2T00149154001:promoter
chrA04	1115900	1116400	500	hypo	7	39	46	18	15.22	71.88	0.000259	5	9	GSBRNA2T00149127001:exon,GSBRNA2T00149127001:exon
chrA04	1193100	1193600	500	hypo	29	36	59	3	44.62	95.16	0.00807	9	7	GSBRNA2T00149114001:exon
chrA04	1612800	1613300	500	hypo	7	30	72	39	18.92	64.86	0.00339	5	9	GSBRNA2T00149040001:intron
chrA04	1790100	1790600	500	hypo	0	42	54	0	0	100	1.01e-08	5	5	GSBRNA2T00126221001:promoter
chrA04	1928100	1928600	500	hypo	0	50	160	8	0	95.24	7.86e-11	9	20	GSBRNA2T00126254001:promoter
chrA04	1928100	1928600	500	hypo	0	50	160	8	0	95.24	7.86e-11	9	20	GSBRNA2T00126254001:promoter,GSBRNA2T00126254001:exon
chrA04	2101800	2102300	500	hypo	0	67	58	3	0	95.08	5.64e-12	6	6	GSBRNA2T00126295001:promoter
chrA04	2101800	2102300	500	hypo	0	67	58	3	0	95.08	5.64e-12	6	6	GSBRNA2T00126295001:promoter,GSBRNA2T00126294001:exon,GSBRNA2T00126294001:exon
chrA04	2449000	2449500	500	hypo	25	52	35	4	32.47	89.74	0.00164	8	5	GSBRNA2T00126362001:promoter
chrA04	2453000	2453500	500	hypo	3	67	31	9	4.29	77.5	2.31e-08	7	5	GSBRNA2T00126364001:promoter
chrA04	3037900	3038400	500	hypo	0	38	90	53	0	62.94	2.76e-06	6	19	GSBRNA2T00126443001:promoter,GSBRNA2T00126442001:promoter
chrA04	3037900	3038400	500	hypo	0	38	90	53	0	62.94	2.76e-06	6	19	GSBRNA2T00126443001:promoter,GSBRNA2T00126442001:promoter,GSBRNA2T00126442001:exon
chrA04	3130900	3131400	500	hypo	10	98	59	128	9.26	31.55	0.00041	9	13	GSBRNA2T00126456001:exon
chrA04	3136900	3137400	500	hypo	1	125	86	126	0.79	40.57	5.19e-11	10	10	GSBRNA2T00126457001:exon
chrA04	3524500	3525000	500	hypo	0	25	48	13	0	78.69	3.45e-05	5	8	GSBRNA2T00126534001:promoter
chrA04	3524500	3525000	500	hypo	0	25	48	13	0	78.69	3.45e-05	5	8	GSBRNA2T00126534001:promoter,GSBRNA2T00126535001:exon
chrA04	4106400	4106900	500	hypo	10	68	71	19	12.82	78.89	1.36e-07	6	8	GSBRNA2T00021776001:promoter
chrA04	4106400	4106900	500	hypo	10	68	71	19	12.82	78.89	1.36e-07	6	8	GSBRNA2T00021776001:promoter,GSBRNA2T00021776001:exon
chrA04	4225000	4226500	1500	hypo	90	104	354	24	46.39	93.65	1.53e-06	21	34	GSBRNA2T00021759001:promoter
chrA04	4302000	4302500	500	hypo	16	48	70	3	25	95.89	2.04e-05	7	8	GSBRNA2T00021746001:exon,GSBRNA2T00021746001:exon,GSBRNA2T00021746001:exon
chrA04	4304000	4304500	500	hypo	0	54	54	14	0	79.41	4.3e-09	6	8	GSBRNA2T00021746001:exon
chrA04	4754000	4754500	500	hypo	0	76	49	11	0	81.67	9.28e-12	10	8	GSBRNA2T00111307001:promoter
chrA04	4754000	4754500	500	hypo	0	76	49	11	0	81.67	9.28e-12	10	8	GSBRNA2T00111307001:promoter,GSBRNA2T00111307001:exon
chrA04	4857900	4858900	1000	hypo	5	148	91	37	3.27	71.09	3.13e-17	12	15	GSBRNA2T00111293001:promoter
chrA04	5269800	5270300	500	hypo	19	61	17	3	23.75	85	0.00165	10	4	GSBRNA2T00111233001:exon,GSBRNA2T00111233001:exon,GSBRNA2T00111233001:exon
chrA04	5939100	5940100	1000	hypo	108	116	221	25	48.21	89.84	2.83e-05	17	18	GSBRNA2T00068479001:promoter
chrA04	7170500	7171000	500	hypo	3	50	45	34	5.66	56.96	1.39e-05	9	10	GSBRNA2T00114524001:exon
chrA04	7862900	7863900	1000	hypo	0	104	87	93	0	48.33	2.86e-11	11	15	GSBRNA2T00114405001:promoter
chrA04	8817800	8818300	500	hypo	20	52	30	10	27.78	75	0.00395	5	5	GSBRNA2T00080535001:promoter
chrA04	9603000	9603500	500	hypo	20	51	58	8	28.17	87.88	0.000187	11	9	GSBRNA2T00068534001:exon
chrA04	9683900	9684400	500	hypo	0	46	55	82	0	40.15	3.48e-05	7	19	GSBRNA2T00068522001:promoter
chrA04	10052700	10053200	500	hypo	0	35	46	13	0	77.97	1.76e-06	6	5	GSBRNA2T00090320001:promoter
chrA04	10052700	10053200	500	hypo	0	35	46	13	0	77.97	1.76e-06	6	5	GSBRNA2T00090320001:promoter,GSBRNA2T00090320001:exon
chrA04	10209400	10209900	500	hypo	7	18	36	2	28	94.74	0.00996	5	5	GSBRNA2T00090284001:exon,GSBRNA2T00090285001:exon
chrA04	10671400	10671900	500	hypo	0	87	36	97	0	27.07	3.42e-06	9	12	GSBRNA2T00090190001:promoter
chrA04	10671400	10671900	500	hypo	0	87	36	97	0	27.07	3.42e-06	9	12	GSBRNA2T00090190001:promoter,GSBRNA2T00090192001:exon,GSBRNA2T00090192001:exon
chrA04	11009100	11009600	500	hypo	0	29	78	13	0	85.71	2.61e-06	5	10	GSBRNA2T00032894001:promoter
chrA04	11342400	11342900	500	hypo	0	52	67	31	0	68.37	3.26e-08	6	11	GSBRNA2T00066960001:promoter,GSBRNA2T00066959001:promoter
chrA04	11795100	11795600	500	hypo	40	52	104	19	43.48	84.55	0.00383	8	9	GSBRNA2T00068258001:intron
chrA04	12078400	12078900	500	hypo	5	31	43	7	13.89	86	0.000152	6	6	GSBRNA2T00083321001:exon
chrA04	13001000	13001500	500	hypo	1	67	75	80	1.47	48.39	1.85e-07	8	11	GSBRNA2T00045291001:promoter,GSBRNA2T00045290001:promoter
chrA04	13319900	13320400	500	hypo	0	88	24	57	0	29.63	1.64e-06	7	7	GSBRNA2T00045214001:promoter
chrA04	13319900	13320400	500	hypo	0	88	24	57	0	29.63	1.64e-06	7	7	GSBRNA2T00045214001:promoter,GSBRNA2T00045215001:exon
chrA04	13992900	13993900	1000	hypo	65	88	200	48	42.48	80.65	0.000244	19	20	GSBRNA2T00043492001:promoter
chrA04	14376000	14376500	500	hypo	0	75	84	68	0	55.26	1.47e-09	6	9	GSBRNA2T00043401001:promoter,GSBRNA2T00043402001:promoter
chrA04	14376000	14376500	500	hypo	0	75	84	68	0	55.26	1.47e-09	6	9	GSBRNA2T00043401001:promoter,GSBRNA2T00043402001:promoter,GSBRNA2T00043402001:exon
chrA04	14629400	14629900	500	hypo	0	60	36	16	0	69.23	1.23e-08	8	7	GSBRNA2T00006351001:exon,GSBRNA2T00006351001:exon
chrA04	14684600	14685100	500	hypo	2	56	77	6	3.45	92.77	6.93e-10	7	9	GSBRNA2T00006368001:promoter
chrA04	14684600	14685100	500	hypo	2	56	77	6	3.45	92.77	6.93e-10	7	9	GSBRNA2T00006368001:promoter,GSBRNA2T00006368001:exon
chrA04	14707600	14708600	1000	hypo	27	73	54	12	27	81.82	7.12e-05	15	13	GSBRNA2T00006374001:promoter
chrA04	14707600	14708600	1000	hypo	27	73	54	12	27	81.82	7.12e-05	15	13	GSBRNA2T00006374001:promoter,GSBRNA2T00006374001:exon,GSBRNA2T00006374001:exon
chrA04	14851400	14851900	500	hypo	0	25	45	16	0	73.77	5.8e-05	5	10	GSBRNA2T00006404001:promoter
chrA04	14851400	14851900	500	hypo	0	25	45	16	0	73.77	5.8e-05	5	10	GSBRNA2T00006404001:promoter,GSBRNA2T00006404001:exon
chrA04	16670700	16671200	500	hypo	0	52	98	63	0	60.87	8.33e-08	6	22	GSBRNA2T00005377001:promoter
chrA04	17112300	17112800	500	hypo	0	72	139	133	0	51.1	5e-09	9	19	GSBRNA2T00123344001:promoter
chrA04	17164500	17165000	500	hypo	0	78	97	98	0	49.74	3.1e-09	9	19	GSBRNA2T00123332001:promoter
chrA04	17569000	17569500	500	hypo	14	33	49	3	29.79	94.23	0.00122	8	7	GSBRNA2T00123235001:promoter,GSBRNA2T00123236001:promoter
chrA04	17769500	17770000	500	hypo	0	57	42	15	0	73.68	8.79e-09	5	8	GSBRNA2T00123186001:exon
chrA04	17795000	17795500	500	hypo	20	88	22	9	18.52	70.97	0.000174	15	5	GSBRNA2T00123181001:promoter
chrA04	18177700	18178200	500	hypo	0	32	40	34	0	54.05	8.4e-05	5	12	GSBRNA2T00045102001:exon
chrA04	18250100	18251100	1000	hypo	4	121	128	20	3.2	86.49	4.85e-18	13	12	GSBRNA2T00045128001:promoter,GSBRNA2T00045127001:promoter
chrA04	18250100	18251100	1000	hypo	4	121	128	20	3.2	86.49	4.85e-18	13	12	GSBRNA2T00045128001:promoter,GSBRNA2T00045127001:promoter,GSBRNA2T00045128001:exon,GSBRNA2T00045128001:exon,GSBRNA2T00045128001:exon
chrA04	18254200	18254700	500	hypo	0	50	20	55	0	26.67	0.000475	5	6	GSBRNA2T00045129001:promoter
chrA04	18254200	18254700	500	hypo	0	50	20	55	0	26.67	0.000475	5	6	GSBRNA2T00045129001:promoter,GSBRNA2T00045129001:exon,GSBRNA2T00045129001:exon
chrA04	18256600	18257600	1000	hypo	1	80	95	46	1.23	67.38	3.29e-11	10	13	GSBRNA2T00045131001:promoter,GSBRNA2T00045130001:promoter
chrA04	18256600	18257600	1000	hypo	1	80	95	46	1.23	67.38	3.29e-11	10	13	GSBRNA2T00045131001:promoter,GSBRNA2T00045130001:promoter,GSBRNA2T00045130001:exon,GSBRNA2T00045130001:exon,GSBRNA2T00045130001:exon
chrA04	18540800	18541300	500	hypo	14	63	45	31	18.18	59.21	0.000454	8	8	GSBRNA2T00063223001:exon,GSBRNA2T00063223001:exon
chrA04	18748800	18749300	500	hypo	0	46	70	26	0	72.92	7.39e-08	5	17	GSBRNA2T00063267001:promoter,GSBRNA2T00063266001:promoter
chrA04	18748800	18749300	500	hypo	0	46	70	26	0	72.92	7.39e-08	5	17	GSBRNA2T00063267001:promoter,GSBRNA2T00063266001:promoter,GSBRNA2T00063266001:exon
chrA04	18850400	18850900	500	hypo	5	50	61	24	9.09	71.76	2.95e-06	9	6	GSBRNA2T00063294001:promoter
chrA04	19044800	19045300	500	hypo	0	40	50	12	0	80.65	2.49e-07	6	7	GSBRNA2T00003354001:exon
chrA04	19067800	19068300	500	hypo	10	74	34	26	11.9	56.67	3.56e-05	10	9	GSBRNA2T00003360001:exon,GSBRNA2T00003360001:exon
chrA04_random	20300	20800	500	hypo	6	28	42	1	17.65	97.67	0.000224	5	5	GSBRNA2T00053338001:promoter
chrA04_random	20300	20800	500	hypo	6	28	42	1	17.65	97.67	0.000224	5	5	GSBRNA2T00053338001:promoter,GSBRNA2T00053339001:exon,GSBRNA2T00053339001:exon
chrA04_random	21900	22400	500	hypo	0	84	29	15	0	65.91	1.58e-10	5	7	GSBRNA2T00053339001:exon,GSBRNA2T00053339001:exon
chrA04_random	47000	47500	500	hypo	5	37	24	22	11.9	52.17	0.00368	5	7	GSBRNA2T00020411001:exon,GSBRNA2T00020411001:exon
chrA04_random	623000	623500	500	hypo	7	110	48	69	5.98	41.03	5.02e-07	10	10	GSBRNA2T00010782001:exon
chrA04_random	805900	806400	500	hypo	0	56	125	42	0	74.85	9.57e-10	5	8	GSBRNA2T00036297001:exon
chrA04_random	1187000	1187500	500	hypo	21	89	75	49	19.09	60.48	2.25e-05	12	12	GSBRNA2T00017492001:promoter
chrA05	483000	483500	500	hypo	0	47	29	25	0	53.7	4.28e-06	5	8	GSBRNA2T00132963001:promoter,GSBRNA2T00132964001:promoter
chrA05	483700	484200	500	hypo	19	31	62	9	38	87.32	0.00869	5	5	GSBRNA2T00132963001:promoter,GSBRNA2T00132964001:promoter
chrA05	645500	646000	500	hypo	0	45	99	5	0	95.19	1.51e-09	6	9	GSBRNA2T00132925001:exon,GSBRNA2T00132925001:exon
chrA05	821500	823000	1500	hypo	0	168	200	47	0	80.97	4.85e-26	21	24	GSBRNA2T00132893001:promoter
chrA05	835800	836300	500	hypo	6	33	43	42	15.38	50.59	0.00947	6	13	GSBRNA2T00132889001:promoter
chrA05	1237800	1238300	500	hypo	7	38	203	26	15.56	88.65	4.05e-06	5	21	GSBRNA2T00132795001:promoter
chrA05	1253600	1254600	1000	hypo	12	226	233	20	5.04	92.09	6.08e-32	20	24	GSBRNA2T00132788001:promoter,GSBRNA2T00132789001:promoter
chrA05	1277000	1277500	500	hypo	60	88	100	11	40.54	90.09	9.34e-05	18	11	GSBRNA2T00132782001:promoter
chrA05	1464100	1464600	500	hypo	32	65	75	4	32.99	94.94	3.65e-05	13	10	GSBRNA2T00132734001:promoter
chrA05	1480600	1481100	500	hypo	4	34	84	11	10.53	88.42	8.33e-06	6	11	GSBRNA2T00132727001:promoter
chrA05	1510300	1510800	500	hypo	0	44	41	19	0	68.33	6.03e-07	5	10	GSBRNA2T00132721001:promoter,GSBRNA2T00132722001:promoter
chrA05	1913300	1913800	500	hypo	1	53	53	19	1.85	73.61	4.43e-08	7	9	GSBRNA2T00132641001:promoter
chrA05	2461000	2463000	2000	hypo	169	139	407	32	54.87	92.71	7.96e-06	40	40	GSBRNA2T00116677001:promoter,GSBRNA2T00116676001:promoter
chrA05	2485200	2485700	500	hypo	0	29	49	41	0	54.44	0.000145	5	14	GSBRNA2T00116687001:promoter,GSBRNA2T00116686001:promoter
chrA05	2485200	2485700	500	hypo	0	29	49	41	0	54.44	0.000145	5	14	GSBRNA2T00116687001:promoter,GSBRNA2T00116686001:promoter,GSBRNA2T00116686001:exon,GSBRNA2T00116686001:exon
chrA05	2928800	2929300	500	hypo	0	46	58	6	0	90.62	7.5e-09	6	7	GSBRNA2T00116788001:promoter
chrA05	2928800	2929300	500	hypo	0	46	58	6	0	90.62	7.5e-09	6	7	GSBRNA2T00116788001:promoter,GSBRNA2T00116787001:exon
chrA05	2986200	2987500	1300	hypo	0	176	143	26	0	84.62	1.24e-26	13	13	GSBRNA2T00116801001:promoter
chrA05	3868300	3868800	500	hypo	13	36	63	14	26.53	81.82	0.00115	8	11	GSBRNA2T00116986001:promoter
chrA05	4103600	4104100	500	hypo	16	72	29	13	18.18	69.05	0.000154	10	7	GSBRNA2T00117034001:exon,GSBRNA2T00117034001:exon,GSBRNA2T00117034001:exon
chrA05	4175800	4176300	500	hypo	0	65	12	23	0	34.29	1.62e-05	11	7	GSBRNA2T00117049001:exon,GSBRNA2T00117049001:exon
chrA05	4558000	4558500	500	hypo	0	38	48	2	0	96	8.17e-08	5	5	GSBRNA2T00117121001:promoter
chrA05	4909900	4910400	500	hypo	0	42	22	5	0	81.48	6.13e-07	5	5	GSBRNA2T00050267001:promoter,GSBRNA2T00050266001:promoter
chrA05	5024900	5025400	500	hypo	52	72	44	9	41.94	83.02	0.00881	15	7	GSBRNA2T00050237001:promoter
chrA05	5065200	5065700	500	hypo	0	29	34	12	0	73.91	2.31e-05	5	6	GSBRNA2T00050231001:exon,GSBRNA2T00050231001:exon
chrA05	5261600	5262100	500	hypo	8	30	71	11	21.05	86.59	0.000421	5	7	GSBRNA2T00095308001:promoter
chrA05	5261600	5262100	500	hypo	8	30	71	11	21.05	86.59	0.000421	5	7	GSBRNA2T00095308001:promoter,GSBRNA2T00095309001:exon
chrA05	6757000	6757500	500	hypo	38	74	78	6	33.93	92.86	3.1e-05	9	9	GSBRNA2T00048562001:promoter
chrA05	6874200	6874700	500	hypo	0	34	89	68	0	56.69	2.17e-05	5	12	GSBRNA2T00048537001:promoter
chrA05	6953600	6955400	1800	hypo	111	175	328	34	38.81	90.61	2.4e-10	32	34	GSBRNA2T00048525001:promoter
chrA05	7025600	7026100	500	hypo	10	59	60	35	14.49	63.16	3.86e-05	6	6	GSBRNA2T00048513001:promoter
chrA05	7185800	7186300	500	hypo	0	37	84	67	0	55.63	1.22e-05	6	23	GSBRNA2T00082090001:promoter
chrA05	7604500	7605000	500	hypo	20	36	101	28	35.71	78.29	0.00652	5	13	GSBRNA2T00066234001:intron
chrA05	9415900	9416900	1000	hypo	14	250	423	29	5.3	93.58	1.91e-38	24	29	GSBRNA2T00082376001:promoter
chrA05	9454900	9455400	500	hypo	64	56	92	0	53.33	100	0.00314	13	12	GSBRNA2T00082384001:promoter
chrA05	10471600	10472600	1000	hypo	8	76	95	36	9.52	72.52	8.37e-09	11	19	GSBRNA2T00042886001:exon
chrA05	10496900	10497400	500	hypo	0	46	77	38	0	66.96	1.77e-07	7	11	GSBRNA2T00042890001:exon,GSBRNA2T00042890001:exon,GSBRNA2T00042890001:exon
chrA05	10582400	10582900	500	hypo	0	41	49	2	0	96.08	2.88e-08	7	6	GSBRNA2T00042896001:promoter
chrA05	10582400	10582900	500	hypo	0	41	49	2	0	96.08	2.88e-08	7	6	GSBRNA2T00042896001:promoter,GSBRNA2T00042896001:exon
chrA05	11067600	11068100	500	hypo	4	85	35	17	4.49	67.31	5e-09	8	5	GSBRNA2T00058611001:promoter
chrA05	11195400	11195900	500	hypo	0	42	161	25	0	86.56	8.11e-09	6	12	GSBRNA2T00058588001:promoter
chrA05	11606000	11607500	1500	hypo	211	173	559	42	54.95	93.01	3.65e-07	41	45	GSBRNA2T00048441001:promoter
chrA05	11606000	11607500	1500	hypo	211	173	559	42	54.95	93.01	3.65e-07	41	45	GSBRNA2T00048441001:promoter,GSBRNA2T00048441001:exon
chrA05	12637400	12637900	500	hypo	0	47	154	36	0	81.05	3.82e-09	5	14	GSBRNA2T00023906001:exon
chrA05	12867600	12868100	500	hypo	19	50	117	8	27.54	93.6	1.26e-05	8	8	GSBRNA2T00036649001:promoter
chrA05	13157600	13158600	1000	hypo	38	102	187	93	27.14	66.79	8.47e-06	19	27	GSBRNA2T00036629001:exon,GSBRNA2T00036629001:exon
chrA05	13173700	13174200	500	hypo	20	65	91	50	23.53	64.54	0.000262	10	16	GSBRNA2T00036624001:promoter
chrA05	13496900	13497400	500	hypo	128	81	85	0	61.24	100	0.00965	12	6	GSBRNA2T00040264001:promoter,GSBRNA2T00040263001:promoter
chrA05	13496900	13497400	500	hypo	128	81	85	0	61.24	100	0.00965	12	6	GSBRNA2T00040264001:promoter,GSBRNA2T00040263001:promoter,GSBRNA2T00040263001:exon
chrA05	13622500	13623000	500	hypo	0	55	163	15	0	91.57	2.32e-11	5	12	GSBRNA2T00040247001:exon,GSBRNA2T00040247001:exon
chrA05	14588200	14588700	500	hypo	3	43	49	33	6.52	59.76	3.76e-05	7	9	GSBRNA2T00029469001:exon,GSBRNA2T00029469001:exon
chrA05	14715100	14716100	1000	hypo	91	98	429	41	48.15	91.28	7.5e-06	13	19	GSBRNA2T00029462001:promoter
chrA05	15589300	15593800	4500	hypo	0	530	545	67	0	89.05	3.42e-82	47	56	GSBRNA2T00009274001:promoter,GSBRNA2T00009273001:promoter
chrA05	15589300	15593800	4500	hypo	0	530	545	67	0	89.05	3.42e-82	47	56	GSBRNA2T00009274001:promoter,GSBRNA2T00009273001:promoter,GSBRNA2T00009274001:exon,GSBRNA2T00009274001:exon,GSBRNA2T00009273001:exon,GSBRNA2T00009273001:exon,GSBRNA2T00009273001:exon,GSBRNA2T00009273001:exon,GSBRNA2T00009273001:exon,GSBRNA2T00009273001:exon,GSBRNA2T00009273001:exon,GSBRNA2T00009273001:exon,GSBRNA2T00009273001:exon,GSBRNA2T00009273001:exon,GSBRNA2T00009273001:exon,GSBRNA2T00009273…
chrA05	15627500	15628000	500	hypo	0	31	16	12	0	57.14	0.000153	6	5	GSBRNA2T00009279001:exon
chrA05	15799200	15799700	500	hypo	3	114	95	10	2.56	90.48	2.8e-17	7	5	GSBRNA2T00009309001:promoter
chrA05	15836600	15837100	500	hypo	0	47	37	26	0	58.73	1.43e-06	5	7	GSBRNA2T00083343001:exon
chrA05	15980800	15981300	500	hypo	4	39	28	2	9.3	93.33	1.07e-05	5	5	GSBRNA2T00083370001:exon
chrA05	16116500	16117800	1300	hypo	9	98	273	22	8.41	92.54	9.27e-16	13	27	GSBRNA2T00091718001:promoter,GSBRNA2T00091717001:promoter
chrA05	16116500	16117800	1300	hypo	9	98	273	22	8.41	92.54	9.27e-16	13	27	GSBRNA2T00091718001:promoter,GSBRNA2T00091717001:promoter,GSBRNA2T00091718001:exon,GSBRNA2T00091718001:exon,GSBRNA2T00091717001:exon
chrA05	16646200	16646700	500	hypo	26	34	176	12	43.33	93.62	0.00238	10	18	GSBRNA2T00153961001:promoter
chrA05	16691700	16692200	500	hypo	4	145	69	61	2.68	53.08	1.92e-13	17	16	GSBRNA2T00153950001:promoter
chrA05	16691700	16692200	500	hypo	4	145	69	61	2.68	53.08	1.92e-13	17	16	GSBRNA2T00153950001:promoter,GSBRNA2T00153950001:exon
chrA05	16998200	16998700	500	hypo	15	44	39	1	25.42	97.5	0.000167	6	5	GSBRNA2T00153887001:promoter
chrA05	16998200	16998700	500	hypo	15	44	39	1	25.42	97.5	0.000167	6	5	GSBRNA2T00153887001:promoter,GSBRNA2T00153887001:exon
chrA05	17309700	17310700	1000	hypo	140	105	220	14	57.14	94.02	0.00042	25	21	GSBRNA2T00153820001:promoter
chrA05	17309700	17310700	1000	hypo	140	105	220	14	57.14	94.02	0.00042	25	21	GSBRNA2T00153820001:promoter,GSBRNA2T00153821001:exon
chrA05	17655700	17656200	500	hypo	39	49	41	3	44.32	93.18	0.00988	10	6	GSBRNA2T00153753001:exon,GSBRNA2T00153753001:exon
chrA05	17957800	17958300	500	hypo	0	58	56	54	0	50.91	3.26e-07	6	15	GSBRNA2T00104947001:promoter
chrA05	18025700	18026200	500	hypo	0	34	34	8	0	80.95	2.7e-06	6	5	GSBRNA2T00104927001:exon
chrA05	18803900	18804400	500	hypo	3	59	84	28	4.84	75	1.45e-08	6	14	GSBRNA2T00104748001:promoter
chrA05	19100700	19101200	500	hypo	2	43	46	16	4.44	74.19	2.09e-06	5	5	GSBRNA2T00079394001:promoter,GSBRNA2T00079395001:promoter
chrA05	19100700	19101200	500	hypo	2	43	46	16	4.44	74.19	2.09e-06	5	5	GSBRNA2T00079394001:promoter,GSBRNA2T00079395001:promoter,GSBRNA2T00079395001:exon
chrA05	19379600	19380100	500	hypo	16	31	72	0	34.04	100	0.000985	9	8	GSBRNA2T00000164001:promoter
chrA05	19397900	19398400	500	hypo	5	37	83	33	11.9	71.55	6.42e-05	7	11	GSBRNA2T00000167001:promoter
chrA05	19677700	19678200	500	hypo	7	66	84	27	9.59	75.68	3.92e-08	6	12	GSBRNA2T00000256001:promoter
chrA05	19677700	19678200	500	hypo	7	66	84	27	9.59	75.68	3.92e-08	6	12	GSBRNA2T00000256001:promoter,GSBRNA2T00000256001:exon
chrA05	20088200	20088700	500	hypo	0	32	21	23	0	47.73	0.000281	5	7	GSBRNA2T00000371001:exon
chrA05	20241500	20242000	500	hypo	6	71	19	20	7.79	48.72	9.39e-05	13	6	GSBRNA2T00000412001:promoter
chrA05	20241500	20242000	500	hypo	6	71	19	20	7.79	48.72	9.39e-05	13	6	GSBRNA2T00000412001:promoter,GSBRNA2T00000411001:exon,GSBRNA2T00000411001:exon
chrA05	21609900	21610900	1000	hypo	296	371	570	97	44.38	85.46	2.73e-13	50	51	GSBRNA2T00038522001:promoter
chrA05	21609900	21610900	1000	hypo	296	371	570	97	44.38	85.46	2.73e-13	50	51	GSBRNA2T00038522001:promoter,GSBRNA2T00038522001:exon,GSBRNA2T00038522001:exon,GSBRNA2T00038522001:exon
chrA05	21758500	21759000	500	hypo	13	191	28	40	6.37	41.18	2.09e-08	27	12	GSBRNA2T00038543001:exon
chrA05	22001000	22002000	1000	hypo	93	171	260	69	35.23	79.03	2.44e-08	14	18	GSBRNA2T00038595001:promoter
chrA05	22112400	22112900	500	hypo	2	36	109	24	5.26	81.95	1.57e-06	5	11	GSBRNA2T00076137001:promoter
chrA05	22141800	22142300	500	hypo	3	64	89	30	4.48	74.79	3.19e-09	9	9	GSBRNA2T00076125001:promoter,GSBRNA2T00076126001:promoter
chrA05	22141800	22142300	500	hypo	3	64	89	30	4.48	74.79	3.19e-09	9	9	GSBRNA2T00076125001:promoter,GSBRNA2T00076126001:promoter,GSBRNA2T00076125001:exon
chrA05	22533500	22534000	500	hypo	3	41	63	41	6.82	60.58	3.96e-05	7	10	GSBRNA2T00092885001:promoter
chrA05	22533500	22534000	500	hypo	3	41	63	41	6.82	60.58	3.96e-05	7	10	GSBRNA2T00092885001:promoter,GSBRNA2T00092884001:exon,GSBRNA2T00092884001:exon,GSBRNA2T00092884001:exon
chrA05	23024900	23025400	500	hypo	0	103	53	129	0	29.12	1.53e-07	12	12	GSBRNA2T00064165001:exon,GSBRNA2T00064165001:exon,GSBRNA2T00064165001:exon
chrA05_random	42600	43100	500	hypo	5	34	27	4	12.82	87.1	0.000149	5	5	GSBRNA2T00016792001:exon,GSBRNA2T00016792001:exon,GSBRNA2T00016792001:exon
chrA05_random	64500	65000	500	hypo	0	52	51	27	0	65.38	8.79e-08	5	7	GSBRNA2T00016795001:exon
chrA05_random	546900	547900	1000	hypo	84	124	135	11	40.38	92.47	2.07e-06	16	13	GSBRNA2T00007248001:promoter,GSBRNA2T00007247001:promoter
chrA05_random	546900	547900	1000	hypo	84	124	135	11	40.38	92.47	2.07e-06	16	13	GSBRNA2T00007248001:promoter,GSBRNA2T00007247001:promoter,GSBRNA2T00007248001:exon
chrA05_random	623600	624100	500	hypo	0	104	38	28	0	57.58	9.19e-12	7	7	GSBRNA2T00033790001:promoter
chrA05_random	695500	696000	500	hypo	2	128	66	68	1.54	49.25	3.48e-12	7	16	GSBRNA2T00017305001:promoter
chrA05_random	695500	696000	500	hypo	2	128	66	68	1.54	49.25	3.48e-12	7	16	GSBRNA2T00017305001:promoter,GSBRNA2T00017304001:exon,GSBRNA2T00017304001:exon
chrA05_random	801400	801900	500	hypo	4	163	118	74	2.4	61.46	6.7e-18	9	9	GSBRNA2T00027749001:exon
chrA05_random	1136600	1137100	500	hypo	4	33	30	3	10.81	90.91	5.76e-05	5	6	GSBRNA2T00029750001:promoter
chrA05_random	1136600	1137100	500	hypo	4	33	30	3	10.81	90.91	5.76e-05	5	6	GSBRNA2T00029750001:promoter,GSBRNA2T00029751001:exon,GSBRNA2T00029751001:exon
chrA05_random	1430700	1431200	500	hypo	0	41	41	1	0	97.62	3.78e-08	5	7	GSBRNA2T00010326001:promoter
chrA05_random	1430700	1431200	500	hypo	0	41	41	1	0	97.62	3.78e-08	5	7	GSBRNA2T00010326001:promoter,GSBRNA2T00010326001:exon,GSBRNA2T00010326001:exon,GSBRNA2T00010326001:exon
chrA05_random	2862000	2862500	500	hypo	25	42	62	13	37.31	82.67	0.00571	10	5	GSBRNA2T00025775001:promoter
chrA06	39100	40100	1000	hypo	0	95	90	27	0	76.92	1.71e-14	15	15	GSBRNA2T00008082001:exon,GSBRNA2T00008082001:exon,GSBRNA2T00008082001:exon,GSBRNA2T00008082001:exon,GSBRNA2T00008082001:exon
chrA06	178500	179000	500	hypo	45	103	42	15	30.41	73.68	0.000726	14	8	GSBRNA2T00095790001:exon,GSBRNA2T00095790001:exon,GSBRNA2T00095790001:exon
chrA06	233200	233700	500	hypo	18	37	73	0	32.73	100	0.000334	6	10	GSBRNA2T00024576001:promoter
chrA06	247200	247700	500	hypo	10	33	41	22	23.26	65.08	0.0093	6	6	GSBRNA2T00024579001:promoter
chrA06	667900	668400	500	hypo	0	55	123	39	0	75.93	1.07e-09	6	19	GSBRNA2T00024650001:promoter
chrA06	830900	831400	500	hypo	0	34	67	20	0	77.01	1.63e-06	6	14	GSBRNA2T00003331001:promoter
chrA06	830900	831400	500	hypo	0	34	67	20	0	77.01	1.63e-06	6	14	GSBRNA2T00003331001:promoter,GSBRNA2T00003331001:exon
chrA06	833300	833800	500	hypo	15	75	23	14	16.67	62.16	0.000417	9	5	GSBRNA2T00003332001:promoter
chrA06	833300	833800	500	hypo	15	75	23	14	16.67	62.16	0.000417	9	5	GSBRNA2T00003332001:promoter,GSBRNA2T00003332001:exon
chrA06	929000	929500	500	hypo	0	32	67	1	0	98.53	2.61e-07	5	7	GSBRNA2T00036056001:promoter,GSBRNA2T00036055001:promoter
chrA06	1066000	1067000	1000	hypo	0	129	155	19	0	89.08	9.28e-22	12	21	GSBRNA2T00011476001:promoter,GSBRNA2T00011477001:promoter
chrA06	1396700	1397200	500	hypo	0	110	100	5	0	95.24	7.54e-19	11	10	GSBRNA2T00021180001:exon
chrA06	1397700	1398200	500	hypo	0	44	47	49	0	48.96	1.11e-05	8	14	GSBRNA2T00021180001:exon
chrA06	1777100	1777600	500	hypo	6	42	46	1	12.5	97.87	2.76e-06	5	5	GSBRNA2T00021123001:intron
chrA06	1783600	1784100	500	hypo	0	103	32	56	0	36.36	1.49e-08	10	9	GSBRNA2T00021122001:exon,GSBRNA2T00021122001:exon
chrA06	1789900	1790400	500	hypo	5	48	20	23	9.43	46.51	0.0017	5	5	GSBRNA2T00021121001:exon
chrA06	1963600	1964100	500	hypo	0	44	65	8	0	89.04	1.36e-08	8	9	GSBRNA2T00091910001:promoter
chrA06	2186400	2186900	500	hypo	0	48	38	13	0	74.51	1.01e-07	6	8	GSBRNA2T00156379001:exon
chrA06	2346800	2347300	500	hypo	0	42	90	6	0	93.75	6.85e-09	7	5	GSBRNA2T00156347001:exon
chrA06	2412100	2412600	500	hypo	1	59	42	26	1.67	61.76	1.32e-07	5	6	GSBRNA2T00156335001:exon
chrA06	2463200	2463700	500	hypo	1	60	12	20	1.64	37.5	7.24e-05	9	6	GSBRNA2T00156325001:exon,GSBRNA2T00156325001:exon,GSBRNA2T00156325001:exon
chrA06	2501400	2501900	500	hypo	0	51	29	11	0	72.5	1.06e-07	6	5	GSBRNA2T00156321001:exon,GSBRNA2T00156321001:exon
chrA06	2572000	2572500	500	hypo	14	48	87	22	22.58	79.82	6.97e-05	11	14	GSBRNA2T00156305001:promoter,GSBRNA2T00156304001:promoter
chrA06	2572000	2572500	500	hypo	14	48	87	22	22.58	79.82	6.97e-05	11	14	GSBRNA2T00156305001:promoter,GSBRNA2T00156304001:promoter,GSBRNA2T00156305001:exon
chrA06	2655400	2655900	500	hypo	0	158	45	31	0	59.21	5.75e-17	14	7	GSBRNA2T00156280001:intron
chrA06	2906000	2906500	500	hypo	4	27	50	4	12.9	92.59	0.000119	6	10	GSBRNA2T00156218001:promoter
chrA06	2906000	2906500	500	hypo	4	27	50	4	12.9	92.59	0.000119	6	10	GSBRNA2T00156218001:promoter,GSBRNA2T00156219001:exon,GSBRNA2T00156219001:exon
chrA06	2920100	2920600	500	hypo	0	141	26	60	0	30.23	1.54e-09	14	12	GSBRNA2T00156216001:promoter
chrA06	2920100	2920600	500	hypo	0	141	26	60	0	30.23	1.54e-09	14	12	GSBRNA2T00156216001:promoter,GSBRNA2T00156217001:exon,GSBRNA2T00156217001:exon
chrA06	3038200	3039200	1000	hypo	25	57	101	21	30.49	82.79	0.000124	13	18	GSBRNA2T00156186001:promoter
chrA06	3038200	3039200	1000	hypo	25	57	101	21	30.49	82.79	0.000124	13	18	GSBRNA2T00156186001:promoter,GSBRNA2T00156186001:exon,GSBRNA2T00156186001:exon
chrA06	3557000	3557500	500	hypo	5	40	23	2	11.11	92	3.27e-05	5	5	GSBRNA2T00105250001:promoter
chrA06	3557000	3557500	500	hypo	5	40	23	2	11.11	92	3.27e-05	5	5	GSBRNA2T00105250001:promoter,GSBRNA2T00105251001:exon
chrA06	3756200	3756700	500	hypo	50	112	46	19	30.86	70.77	0.000853	17	10	GSBRNA2T00105300001:exon,GSBRNA2T00105300001:exon
chrA06	3848000	3848500	500	hypo	6	31	33	9	16.22	78.57	0.00084	5	7	GSBRNA2T00105324001:promoter
chrA06	4269500	4270000	500	hypo	0	63	33	65	0	33.67	1.23e-05	8	8	GSBRNA2T00105421001:exon
chrA06	4337100	4337600	500	hypo	0	52	69	1	0	98.57	2.06e-10	8	11	GSBRNA2T00105436001:promoter
chrA06	4582600	4583100	500	hypo	0	191	16	16	0	50	1.45e-16	21	5	GSBRNA2T00105474001:exon
chrA06	4746000	4746500	500	hypo	4	31	55	6	11.43	90.16	3.56e-05	5	5	GSBRNA2T00105509001:promoter
chrA06	5020800	5022300	1500	hypo	0	97	215	24	0	89.96	3.98e-18	13	21	GSBRNA2T00081707001:intron
chrA06	5050800	5051300	500	hypo	27	113	42	28	19.29	60	5.16e-05	14	6	GSBRNA2T00081714001:exon
chrA06	5111200	5111700	500	hypo	5	33	28	3	13.16	90.32	0.000134	6	6	GSBRNA2T00081728001:promoter
chrA06	5259800	5260300	500	hypo	0	49	128	55	0	69.95	2.22e-08	5	20	GSBRNA2T00062212001:promoter,GSBRNA2T00062213001:promoter
chrA06	5358200	5358700	500	hypo	0	32	85	7	0	92.39	3.59e-07	5	6	GSBRNA2T00062246001:promoter,GSBRNA2T00062245001:promoter
chrA06	5419600	5420100	500	hypo	1	51	77	30	1.92	71.96	4.89e-08	8	7	GSBRNA2T00062260001:exon
chrA06	5448400	5448900	500	hypo	11	43	203	19	20.37	91.44	3.03e-06	8	18	GSBRNA2T00062265001:promoter
chrA06	5715000	5716500	1500	hypo	6	208	562	200	2.8	73.75	1.13e-29	28	42	GSBRNA2T00057957001:promoter
chrA06	5715000	5716500	1500	hypo	6	208	562	200	2.8	73.75	1.13e-29	28	42	GSBRNA2T00057957001:promoter,GSBRNA2T00057957001:exon
chrA06	5719600	5720600	1000	hypo	0	141	60	50	0	54.55	4.08e-15	19	11	GSBRNA2T00057959001:promoter
chrA06	5719600	5720600	1000	hypo	0	141	60	50	0	54.55	4.08e-15	19	11	GSBRNA2T00057959001:promoter,GSBRNA2T00057959001:exon,GSBRNA2T00057959001:exon,GSBRNA2T00057959001:exon
chrA06	5867600	5868100	500	hypo	0	58	65	22	0	74.71	2.05e-09	6	10	GSBRNA2T00057990001:promoter
chrA06	6513400	6513900	500	hypo	0	61	30	21	0	58.82	8.7e-08	8	7	GSBRNA2T00034817001:exon
chrA06	6816200	6816700	500	hypo	64	57	91	6	52.89	93.81	0.00681	7	7	GSBRNA2T00035622001:promoter
chrA06	6977800	6978300	500	hypo	10	68	39	21	12.82	65	1.36e-05	10	5	GSBRNA2T00035586001:promoter
chrA06	7210100	7210600	500	hypo	0	51	69	20	0	77.53	8.11e-09	7	10	GSBRNA2T00097012001:promoter
chrA06	7354000	7354500	500	hypo	0	85	79	72	0	52.32	4.31e-10	5	12	GSBRNA2T00043010001:promoter
chrA06	7623400	7623900	500	hypo	0	59	69	35	0	66.35	7.15e-09	7	15	GSBRNA2T00042965001:intron
chrA06	7782100	7782600	500	hypo	42	94	40	16	30.88	71.43	0.00183	8	8	GSBRNA2T00043229001:promoter
chrA06	7782100	7782600	500	hypo	42	94	40	16	30.88	71.43	0.00183	8	8	GSBRNA2T00043229001:promoter,GSBRNA2T00043229001:exon
chrA06	8203300	8204300	1000	hypo	59	96	360	29	38.06	92.54	9.65e-08	14	18	GSBRNA2T00043136001:promoter
chrA06	8204300	8204800	500	hypo	0	56	161	10	0	94.15	9.56e-12	7	11	GSBRNA2T00043136001:promoter
chrA06	8523800	8524300	500	hypo	9	84	59	32	9.68	64.84	8.52e-08	7	6	GSBRNA2T00125469001:promoter
chrA06	9197900	9198400	500	hypo	14	25	104	5	35.9	95.41	0.0033	5	8	GSBRNA2T00125361001:intron
chrA06	9571200	9571700	500	hypo	0	42	136	2	0	98.55	1.45e-09	5	9	GSBRNA2T00063048001:promoter
chrA06	9678500	9679000	500	hypo	0	36	40	16	0	71.43	3.5e-06	5	6	GSBRNA2T00063067001:promoter
chrA06	9802700	9803200	500	hypo	25	41	50	8	37.88	86.21	0.00634	6	6	GSBRNA2T00063085001:exon,GSBRNA2T00063085001:exon,GSBRNA2T00063085001:exon
chrA06	9818000	9818500	500	hypo	6	61	32	2	8.96	94.12	1.04e-07	7	6	GSBRNA2T00063088001:promoter
chrA06	10463100	10463600	500	hypo	0	77	42	5	0	89.36	3.07e-12	5	5	GSBRNA2T00107288001:intron
chrA06	10569900	10570400	500	hypo	0	66	68	18	0	79.07	8.32e-11	7	5	GSBRNA2T00107310001:promoter
chrA06	10569900	10570400	500	hypo	0	66	68	18	0	79.07	8.32e-11	7	5	GSBRNA2T00107310001:promoter,GSBRNA2T00107310001:exon,GSBRNA2T00107310001:exon
chrA06	10724500	10725000	500	hypo	18	42	51	16	30	76.12	0.00385	10	6	GSBRNA2T00107331001:promoter
chrA06	10724500	10725000	500	hypo	18	42	51	16	30	76.12	0.00385	10	6	GSBRNA2T00107331001:promoter,GSBRNA2T00107331001:exon
chrA06	11004900	11005400	500	hypo	19	38	64	15	33.33	81.01	0.00412	10	10	GSBRNA2T00107359001:promoter
chrA06	11216900	11217400	500	hypo	0	48	19	21	0	47.5	1.46e-05	9	6	GSBRNA2T00064924001:exon
chrA06	12430300	12432100	1800	hypo	5	110	84	4	4.35	95.45	3.38e-16	14	11	GSBRNA2T00046482001:promoter,GSBRNA2T00046481001:promoter
chrA06	12430300	12432100	1800	hypo	5	110	84	4	4.35	95.45	3.38e-16	14	11	GSBRNA2T00046482001:promoter,GSBRNA2T00046481001:promoter,GSBRNA2T00046482001:exon,GSBRNA2T00046481001:exon,GSBRNA2T00046481001:exon,GSBRNA2T00046481001:exon,GSBRNA2T00046481001:exon
chrA06	13373100	13374100	1000	hypo	28	173	247	22	13.93	91.82	1.38e-20	21	26	GSBRNA2T00061414001:promoter
chrA06	13373100	13374100	1000	hypo	28	173	247	22	13.93	91.82	1.38e-20	21	26	GSBRNA2T00061414001:promoter,GSBRNA2T00061414001:exon,GSBRNA2T00061414001:exon,GSBRNA2T00061414001:exon
chrA06	13378200	13378700	500	hypo	0	35	102	5	0	95.33	6.04e-08	6	13	GSBRNA2T00061412001:promoter
chrA06	13957800	13958300	500	hypo	0	78	67	47	0	58.77	4.35e-10	7	13	GSBRNA2T00016299001:promoter
chrA06	14178900	14179400	500	hypo	0	45	30	30	0	50	1.13e-05	7	7	GSBRNA2T00016330001:promoter
chrA06	14247700	14248700	1000	hypo	145	90	135	5	61.7	96.43	0.00525	18	12	GSBRNA2T00016347001:promoter
chrA06	14247700	14248700	1000	hypo	145	90	135	5	61.7	96.43	0.00525	18	12	GSBRNA2T00016347001:promoter,GSBRNA2T00016347001:exon
chrA06	14249000	14251300	2300	hypo	12	221	250	23	5.15	91.58	1.45e-31	22	23	GSBRNA2T00016347001:exon,GSBRNA2T00016347001:exon
chrA06	14564200	14565200	1000	hypo	44	178	244	103	19.82	70.32	1.29e-12	16	17	GSBRNA2T00109727001:promoter
chrA06	14996600	14997600	1000	hypo	73	199	240	20	26.84	92.31	2e-15	30	28	GSBRNA2T00109817001:promoter
chrA06	14996600	14997600	1000	hypo	73	199	240	20	26.84	92.31	2e-15	30	28	GSBRNA2T00109817001:promoter,GSBRNA2T00109817001:exon,GSBRNA2T00109817001:exon
chrA06	15560200	15560700	500	hypo	19	61	54	1	23.75	98.18	4.65e-06	6	6	GSBRNA2T00109912001:promoter,GSBRNA2T00109913001:promoter
chrA06	16020600	16021100	500	hypo	0	54	125	20	0	86.21	1.77e-10	7	11	GSBRNA2T00073162001:promoter
chrA06	16616600	16617600	1000	hypo	8	78	99	7	9.3	93.4	2.7e-11	14	11	GSBRNA2T00000782001:promoter,GSBRNA2T00000781001:promoter
chrA06	16616600	16617600	1000	hypo	8	78	99	7	9.3	93.4	2.7e-11	14	11	GSBRNA2T00000782001:promoter,GSBRNA2T00000781001:promoter,GSBRNA2T00000781001:exon
chrA06	17161600	17162100	500	hypo	0	39	103	3	0	97.17	9.84e-09	5	13	GSBRNA2T00000682001:promoter
chrA06	17162600	17163100	500	hypo	27	32	84	6	45.76	93.33	0.00962	7	11	GSBRNA2T00000681001:promoter
chrA06	17162600	17163100	500	hypo	27	32	84	6	45.76	93.33	0.00962	7	11	GSBRNA2T00000681001:promoter,GSBRNA2T00000682001:exon
chrA06	17765800	17766300	500	hypo	47	62	48	6	43.12	88.89	0.00584	16	6	GSBRNA2T00042089001:exon
chrA06	17898000	17898500	500	hypo	0	55	35	5	0	87.5	3.1e-09	7	5	GSBRNA2T00147393001:exon
chrA06	17921700	17922200	500	hypo	0	71	75	21	0	78.12	1.85e-11	9	8	GSBRNA2T00147400001:promoter
chrA06	17921700	17922200	500	hypo	0	71	75	21	0	78.12	1.85e-11	9	8	GSBRNA2T00147400001:promoter,GSBRNA2T00147400001:exon
chrA06	18004600	18005100	500	hypo	1	80	104	59	1.23	63.8	7.21e-11	8	17	GSBRNA2T00147425001:promoter
chrA06	18408900	18409400	500	hypo	4	39	346	24	9.3	93.51	1.12e-07	7	11	GSBRNA2T00147517001:promoter,GSBRNA2T00147516001:promoter
chrA06	18408900	18409400	500	hypo	4	39	346	24	9.3	93.51	1.12e-07	7	11	GSBRNA2T00147517001:promoter,GSBRNA2T00147516001:promoter,GSBRNA2T00147516001:exon
chrA06	18758200	18758700	500	hypo	24	34	396	43	41.38	90.21	0.00164	7	8	GSBRNA2T00147584001:promoter
chrA06	18841600	18842100	500	hypo	0	95	28	7	0	80	7.86e-13	7	5	GSBRNA2T00147604001:promoter
chrA06	19463300	19463800	500	hypo	0	74	33	34	0	49.25	4.03e-08	6	9	GSBRNA2T00147722001:promoter,GSBRNA2T00147724001:promoter,GSBRNA2T00147726001:promoter
chrA06	19579600	19580100	500	hypo	2	91	17	50	2.15	25.37	8.47e-05	6	5	GSBRNA2T00034127001:promoter
chrA06	19711700	19712200	500	hypo	3	68	66	7	4.23	90.41	1.13e-10	8	6	GSBRNA2T00144224001:promoter
chrA06	19711700	19712200	500	hypo	3	68	66	7	4.23	90.41	1.13e-10	8	6	GSBRNA2T00144224001:promoter,GSBRNA2T00144224001:exon
chrA06	19887000	19887500	500	hypo	0	38	75	50	0	60	5.08e-06	5	13	GSBRNA2T00144271001:promoter
chrA06	20159600	20160600	1000	hypo	299	148	351	34	66.89	91.17	0.00316	33	27	GSBRNA2T00144345001:promoter
chrA06	20629800	20630300	500	hypo	6	50	27	16	10.71	62.79	0.00013	8	7	GSBRNA2T00144467001:exon,GSBRNA2T00144467001:exon
chrA06	20804700	20805200	500	hypo	16	45	91	25	26.23	78.45	0.000338	9	17	GSBRNA2T00144483001:promoter
chrA06	20949100	20949600	500	hypo	0	49	18	46	0	28.12	0.000414	9	8	GSBRNA2T00144534001:exon
chrA06	21958300	21958800	500	hypo	0	36	63	16	0	79.75	6.62e-07	6	7	GSBRNA2T00078023001:promoter
chrA06	21958300	21958800	500	hypo	0	36	63	16	0	79.75	6.62e-07	6	7	GSBRNA2T00078023001:promoter,GSBRNA2T00078023001:exon
chrA06	22047400	22047900	500	hypo	0	31	47	0	0	100	6.23e-07	5	5	GSBRNA2T00077999001:promoter
chrA06	22047400	22047900	500	hypo	0	31	47	0	0	100	6.23e-07	5	5	GSBRNA2T00077999001:promoter,GSBRNA2T00078000001:exon
chrA06	22064800	22065300	500	hypo	0	65	79	79	0	50	6.07e-08	9	10	GSBRNA2T00077998001:intron
chrA06	22080200	22080700	500	hypo	0	44	33	10	0	76.74	2.85e-07	8	8	GSBRNA2T00077996001:promoter
chrA06	22080200	22080700	500	hypo	0	44	33	10	0	76.74	2.85e-07	8	8	GSBRNA2T00077996001:promoter,GSBRNA2T00077996001:exon
chrA06	22250200	22250700	500	hypo	0	65	76	46	0	62.3	3.15e-09	6	12	GSBRNA2T00088751001:promoter
chrA06	22354100	22354600	500	hypo	0	26	104	17	0	85.95	5.9e-06	5	11	GSBRNA2T00081584001:intron
chrA06	22546500	22547000	500	hypo	0	27	33	16	0	67.35	7.89e-05	5	8	GSBRNA2T00081634001:promoter
chrA06	22671600	22672600	1000	hypo	18	112	125	18	13.85	87.41	1.36e-12	13	14	GSBRNA2T00001822001:promoter
chrA06	22829000	22829500	500	hypo	12	57	99	18	17.39	84.62	8.61e-07	6	6	GSBRNA2T00001849001:promoter
chrA06	22834800	22835300	500	hypo	0	35	23	25	0	47.92	0.000142	5	7	GSBRNA2T00001851001:promoter
chrA06	22834800	22835300	500	hypo	0	35	23	25	0	47.92	0.000142	5	7	GSBRNA2T00001851001:promoter,GSBRNA2T00001850001:exon,GSBRNA2T00001850001:exon
chrA06	23432100	23432600	500	hypo	3	80	351	31	3.61	91.88	3.76e-15	5	5	GSBRNA2T00054755001:promoter
chrA06	23457200	23457700	500	hypo	11	70	53	26	13.58	67.09	4.32e-06	6	6	GSBRNA2T00054744001:promoter
chrA06	23468400	23469400	1000	hypo	37	156	127	86	19.17	59.62	3.75e-08	11	18	GSBRNA2T00054741001:promoter
chrA06	23468400	23469400	1000	hypo	37	156	127	86	19.17	59.62	3.75e-08	11	18	GSBRNA2T00054741001:promoter,GSBRNA2T00054741001:exon
chrA06	23641500	23642000	500	hypo	27	115	38	3	19.01	92.68	8.33e-08	19	5	GSBRNA2T00054711001:promoter
chrA06	23644600	23645100	500	hypo	0	62	41	54	0	43.16	1.2e-06	8	7	GSBRNA2T00054711001:exon
chrA06	24079900	24080400	500	hypo	0	45	52	12	0	81.25	4.8e-08	6	5	GSBRNA2T00018847001:exon,GSBRNA2T00018847001:exon,GSBRNA2T00018847001:exon,GSBRNA2T00018847001:exon
chrA06	24193100	24193600	500	hypo	57	65	75	9	46.72	89.29	0.00394	11	10	GSBRNA2T00018873001:promoter
chrA06_random	15700	16200	500	hypo	0	55	97	6	0	94.17	5.33e-11	5	8	GSBRNA2T00056783001:promoter,GSBRNA2T00056782001:promoter,GSBRNA2T00072084001:promoter
chrA06_random	15700	16200	500	hypo	0	55	97	6	0	94.17	5.33e-11	5	8	GSBRNA2T00056783001:promoter,GSBRNA2T00056782001:promoter,GSBRNA2T00072084001:promoter,GSBRNA2T00072084001:exon
chrA06_random	24700	25200	500	hypo	21	36	32	3	36.84	91.43	0.00938	7	6	GSBRNA2T00056784001:promoter
chrA06_random	24700	25200	500	hypo	21	36	32	3	36.84	91.43	0.00938	7	6	GSBRNA2T00056784001:promoter,GSBRNA2T00056785001:exon,GSBRNA2T00056785001:exon
chrA06_random	508300	510300	2000	hypo	113	229	397	28	33.04	93.41	2.44e-16	22	24	GSBRNA2T00066885001:promoter
chrA06_random	1494600	1495100	500	hypo	0	33	17	39	0	30.36	0.00248	5	7	GSBRNA2T00023382001:exon,GSBRNA2T00023382001:exon
chrA06_random	1942600	1943100	500	hypo	7	127	86	46	5.22	65.15	3.26e-13	8	8	GSBRNA2T00023043001:promoter,GSBRNA2T00023041001:promoter
chrA06_random	1947700	1948200	500	hypo	0	95	37	61	0	37.76	2.54e-08	6	10	GSBRNA2T00023044001:exon
chrA07	223500	224000	500	hypo	2	39	34	9	4.88	79.07	5.95e-06	7	7	GSBRNA2T00050768001:exon,GSBRNA2T00050768001:exon,GSBRNA2T00050768001:exon
chrA07	323600	324100	500	hypo	15	25	101	9	37.5	91.82	0.00609	7	13	GSBRNA2T00050742001:promoter,GSBRNA2T00050743001:promoter
chrA07	703200	703700	500	hypo	0	84	26	28	0	48.15	1.23e-08	11	9	GSBRNA2T00059431001:promoter
chrA07	821100	821600	500	hypo	35	68	84	44	33.98	65.62	0.00592	9	7	GSBRNA2T00059410001:promoter,GSBRNA2T00059411001:promoter
chrA07	821100	821600	500	hypo	35	68	84	44	33.98	65.62	0.00592	9	7	GSBRNA2T00059410001:promoter,GSBRNA2T00059411001:promoter,GSBRNA2T00059411001:exon,GSBRNA2T00059411001:exon
chrA07	1535000	1535500	500	hypo	0	34	26	30	0	46.43	0.000193	6	7	GSBRNA2T00077486001:promoter
chrA07	1535000	1535500	500	hypo	0	34	26	30	0	46.43	0.000193	6	7	GSBRNA2T00077486001:promoter,GSBRNA2T00077486001:exon,GSBRNA2T00077486001:exon
chrA07	1825600	1826100	500	hypo	0	66	73	4	0	94.81	3.27e-12	6	6	GSBRNA2T00065468001:promoter
chrA07	1825600	1826100	500	hypo	0	66	73	4	0	94.81	3.27e-12	6	6	GSBRNA2T00065468001:promoter,GSBRNA2T00065468001:exon,GSBRNA2T00065468001:exon
chrA07	2484300	2487000	2700	hypo	140	152	308	37	47.95	89.28	1.34e-06	30	36	GSBRNA2T00026568001:promoter
chrA07	2769200	2769700	500	hypo	27	31	239	17	46.55	93.36	0.00475	5	16	GSBRNA2T00047582001:promoter
chrA07	3504100	3504600	500	hypo	17	66	40	20	20.48	66.67	0.000315	11	7	GSBRNA2T00089066001:promoter
chrA07	3519500	3520900	1400	hypo	106	108	158	9	49.53	94.61	6.33e-05	14	14	GSBRNA2T00089063001:promoter
chrA07	3519500	3520900	1400	hypo	106	108	158	9	49.53	94.61	6.33e-05	14	14	GSBRNA2T00089063001:promoter,GSBRNA2T00089063001:exon,GSBRNA2T00089063001:exon,GSBRNA2T00089063001:exon,GSBRNA2T00089063001:exon,GSBRNA2T00089063001:exon
chrA07	3625700	3626200	500	hypo	57	129	59	8	30.65	88.06	4.54e-06	21	5	GSBRNA2T00089048001:promoter
chrA07	3625700	3626200	500	hypo	57	129	59	8	30.65	88.06	4.54e-06	21	5	GSBRNA2T00089048001:promoter,GSBRNA2T00089048001:exon,GSBRNA2T00089048001:exon
chrA07	5746100	5746600	500	hypo	5	40	20	6	11.11	76.92	0.000189	7	5	GSBRNA2T00128236001:exon
chrA07	6158000	6158500	500	hypo	10	33	164	41	23.26	80	0.000405	7	23	GSBRNA2T00128307001:promoter
chrA07	6805600	6806100	500	hypo	0	61	36	26	0	58.06	7.36e-08	8	5	GSBRNA2T00128396001:promoter
chrA07	7486000	7486500	500	hypo	0	43	215	13	0	94.3	9.5e-10	8	9	GSBRNA2T00128500001:promoter,GSBRNA2T00128498001:promoter
chrA07	7486000	7486500	500	hypo	0	43	215	13	0	94.3	9.5e-10	8	9	GSBRNA2T00128500001:promoter,GSBRNA2T00128498001:promoter,GSBRNA2T00128498001:exon
chrA07	7535800	7536300	500	hypo	0	31	78	143	0	35.29	0.00114	5	8	GSBRNA2T00128508001:promoter
chrA07	7535800	7536300	500	hypo	0	31	78	143	0	35.29	0.00114	5	8	GSBRNA2T00128508001:promoter,GSBRNA2T00128509001:exon
chrA07	7748400	7748900	500	hypo	5	31	90	24	13.89	78.95	0.000129	5	12	GSBRNA2T00076212001:promoter
chrA07	7840800	7841300	500	hypo	0	60	17	38	0	30.91	5.52e-05	9	6	GSBRNA2T00076201001:promoter
chrA07	8592700	8593200	500	hypo	0	46	95	27	0	77.87	1.97e-08	7	11	GSBRNA2T00089891001:promoter
chrA07	9004400	9006000	1600	hypo	0	150	232	20	0	92.06	1.77e-26	16	20	GSBRNA2T00069464001:promoter
chrA07	9004400	9006000	1600	hypo	0	150	232	20	0	92.06	1.77e-26	16	20	GSBRNA2T00069464001:promoter,GSBRNA2T00069463001:exon,GSBRNA2T00069463001:exon
chrA07	9029800	9030300	500	hypo	0	81	124	60	0	67.39	4.56e-12	7	18	GSBRNA2T00069455001:promoter
chrA07	9182800	9183300	500	hypo	0	104	123	74	0	62.44	6.19e-14	7	17	GSBRNA2T00069431001:promoter
chrA07	9392800	9393300	500	hypo	0	75	142	10	0	93.42	1.67e-14	7	9	GSBRNA2T00033224001:exon,GSBRNA2T00033224001:exon
chrA07	10211300	10213100	1800	hypo	63	56	248	16	52.94	93.94	0.00128	15	28	GSBRNA2T00112261001:promoter
chrA07	10211300	10213100	1800	hypo	63	56	248	16	52.94	93.94	0.00128	15	28	GSBRNA2T00112261001:promoter,GSBRNA2T00112261001:exon,GSBRNA2T00112261001:exon,GSBRNA2T00112261001:exon
chrA07	10679300	10679800	500	hypo	5	165	127	7	2.94	94.78	1.92e-24	10	6	GSBRNA2T00112363001:intron
chrA07	10878000	10878500	500	hypo	0	161	33	28	0	54.1	7.79e-16	12	9	GSBRNA2T00112390001:exon,GSBRNA2T00112390001:exon,GSBRNA2T00112390001:exon
chrA07	11025300	11025800	500	hypo	0	37	13	36	0	26.53	0.0028	5	7	GSBRNA2T00112417001:promoter
chrA07	11291900	11292900	1000	hypo	22	54	294	27	28.95	91.59	2.69e-06	11	17	GSBRNA2T00081684001:promoter
chrA07	11509000	11509500	500	hypo	17	72	26	8	19.1	76.47	0.000115	10	6	GSBRNA2T00118614001:exon,GSBRNA2T00118614001:exon,GSBRNA2T00118614001:exon
chrA07	11808800	11809300	500	hypo	0	65	57	8	0	87.69	3.86e-11	6	5	GSBRNA2T00118671001:promoter
chrA07	11901800	11902300	500	hypo	15	85	62	10	15	86.11	1.56e-08	8	8	GSBRNA2T00118685001:promoter
chrA07	12040300	12040800	500	hypo	0	82	26	44	0	37.14	3.4e-07	7	7	GSBRNA2T00118716001:promoter
chrA07	12106900	12107900	1000	hypo	0	262	247	20	0	92.51	4.59e-42	19	19	GSBRNA2T00118724001:promoter
chrA07	12107900	12111200	3300	hypo	57	491	577	68	10.4	89.46	2e-57	56	53	GSBRNA2T00118724001:promoter
chrA07	12107900	12111200	3300	hypo	57	491	577	68	10.4	89.46	2e-57	56	53	GSBRNA2T00118724001:promoter,GSBRNA2T00118724001:exon,GSBRNA2T00118724001:exon,GSBRNA2T00118724001:exon,GSBRNA2T00118724001:exon,GSBRNA2T00118724001:exon,GSBRNA2T00118724001:exon,GSBRNA2T00118724001:exon
chrA07	12441600	12442600	1000	hypo	24	143	113	42	14.37	72.9	8.44e-12	15	13	GSBRNA2T00118767001:promoter
chrA07	12441600	12442600	1000	hypo	24	143	113	42	14.37	72.9	8.44e-12	15	13	GSBRNA2T00118767001:promoter,GSBRNA2T00118767001:exon
chrA07	12531000	12532800	1800	hypo	19	162	274	26	10.5	91.33	7.95e-22	20	26	GSBRNA2T00118781001:promoter
chrA07	12531000	12532800	1800	hypo	19	162	274	26	10.5	91.33	7.95e-22	20	26	GSBRNA2T00118781001:promoter,GSBRNA2T00118782001:exon,GSBRNA2T00118782001:exon,GSBRNA2T00118782001:exon,GSBRNA2T00118782001:exon,GSBRNA2T00118782001:exon,GSBRNA2T00118782001:exon,GSBRNA2T00118782001:exon,GSBRNA2T00118782001:exon
chrA07	12762700	12763200	500	hypo	0	98	101	15	0	87.07	2.53e-16	10	6	GSBRNA2T00098492001:promoter,GSBRNA2T00098491001:promoter
chrA07	12878800	12879300	500	hypo	56	78	77	8	41.79	90.59	0.000497	10	7	GSBRNA2T00098518001:promoter
chrA07	12954900	12955400	500	hypo	14	58	49	31	19.44	61.25	0.000613	7	8	GSBRNA2T00098537001:promoter
chrA07	12963400	12963900	500	hypo	0	102	18	62	0	22.5	5.7e-06	11	11	GSBRNA2T00098539001:promoter
chrA07	12963400	12963900	500	hypo	0	102	18	62	0	22.5	5.7e-06	11	11	GSBRNA2T00098539001:promoter,GSBRNA2T00098539001:exon
chrA07	13241000	13241500	500	hypo	9	26	103	8	25.71	92.79	0.000743	5	11	GSBRNA2T00098595001:exon,GSBRNA2T00098595001:exon
chrA07	13399700	13401300	1600	hypo	0	159	173	5	0	97.19	1.28e-27	19	12	GSBRNA2T00098628001:promoter
chrA07	13399700	13401300	1600	hypo	0	159	173	5	0	97.19	1.28e-27	19	12	GSBRNA2T00098628001:promoter,GSBRNA2T00098627001:exon,GSBRNA2T00098627001:exon
chrA07	13402000	13402500	500	hypo	28	40	59	9	41.18	86.76	0.00877	6	6	GSBRNA2T00098628001:promoter
chrA07	13402000	13402500	500	hypo	28	40	59	9	41.18	86.76	0.00877	6	6	GSBRNA2T00098628001:promoter,GSBRNA2T00098628001:exon,GSBRNA2T00098627001:exon,GSBRNA2T00098627001:exon
chrA07	13568700	13569200	500	hypo	0	85	44	48	0	47.83	4.64e-09	8	8	GSBRNA2T00098672001:promoter
chrA07	13757800	13758300	500	hypo	0	69	13	42	0	23.64	0.000135	10	8	GSBRNA2T00098709001:promoter
chrA07	13757800	13758300	500	hypo	0	69	13	42	0	23.64	0.000135	10	8	GSBRNA2T00098709001:promoter,GSBRNA2T00098708001:exon,GSBRNA2T00098708001:exon
chrA07	13803700	13805100	1400	hypo	40	108	201	27	27.03	88.16	2.05e-09	13	20	GSBRNA2T00098720001:promoter
chrA07	13803700	13805100	1400	hypo	40	108	201	27	27.03	88.16	2.05e-09	13	20	GSBRNA2T00098720001:promoter,GSBRNA2T00098719001:exon,GSBRNA2T00098720001:exon,GSBRNA2T00098721001:exon,GSBRNA2T00098721001:exon,GSBRNA2T00098721001:exon
chrA07	14030300	14030800	500	hypo	69	91	67	9	43.12	88.16	0.00112	13	6	GSBRNA2T00098775001:promoter
chrA07	14116700	14117200	500	hypo	0	35	10	30	0	25	0.00485	6	6	GSBRNA2T00098782001:exon
chrA07	14324900	14325400	500	hypo	15	37	57	13	28.85	81.43	0.00205	6	6	GSBRNA2T00098826001:promoter
chrA07	14324900	14325400	500	hypo	15	37	57	13	28.85	81.43	0.00205	6	6	GSBRNA2T00098826001:promoter,GSBRNA2T00098826001:exon
chrA07	14446800	14447300	500	hypo	0	77	105	99	0	51.47	2.03e-09	11	21	GSBRNA2T00098856001:promoter
chrA07	14452300	14452800	500	hypo	2	32	180	7	5.88	96.26	5.62e-07	5	24	GSBRNA2T00098857001:promoter
chrA07	14599300	14599800	500	hypo	58	77	62	7	42.96	89.86	0.00158	9	9	GSBRNA2T00098885001:promoter,GSBRNA2T00098884001:promoter
chrA07	15210100	15211100	1000	hypo	14	124	251	66	10.14	79.18	1.98e-15	14	30	GSBRNA2T00099031001:promoter,GSBRNA2T00099032001:promoter
chrA07	15210100	15211100	1000	hypo	14	124	251	66	10.14	79.18	1.98e-15	14	30	GSBRNA2T00099031001:promoter,GSBRNA2T00099032001:promoter,GSBRNA2T00099031001:exon,GSBRNA2T00099031001:exon
chrA07	15389000	15389500	500	hypo	1	50	28	9	1.96	75.68	3.01e-07	6	6	GSBRNA2T00099064001:exon,GSBRNA2T00099064001:exon
chrA07	15393300	15393800	500	hypo	28	42	117	5	40	95.9	0.000599	5	10	GSBRNA2T00099065001:promoter
chrA07	15393300	15393800	500	hypo	28	42	117	5	40	95.9	0.000599	5	10	GSBRNA2T00099065001:promoter,GSBRNA2T00099066001:exon
chrA07	15437000	15437500	500	hypo	6	62	56	47	8.82	54.37	1.3e-05	10	11	GSBRNA2T00099073001:promoter
chrA07	15458100	15458600	500	hypo	0	43	57	46	0	55.34	3.93e-06	6	10	GSBRNA2T00099080001:promoter,GSBRNA2T00099079001:promoter
chrA07	15836900	15837400	500	hypo	0	38	18	16	0	52.94	5.02e-05	6	5	GSBRNA2T00099172001:exon,GSBRNA2T00099172001:exon,GSBRNA2T00099172001:exon
chrA07	16614300	16615300	1000	hypo	0	86	104	8	0	92.86	1.91e-15	12	15	GSBRNA2T00099346001:promoter,GSBRNA2T00099345001:promoter
chrA07	16614300	16615300	1000	hypo	0	86	104	8	0	92.86	1.91e-15	12	15	GSBRNA2T00099346001:promoter,GSBRNA2T00099345001:promoter,GSBRNA2T00099346001:exon,GSBRNA2T00099346001:exon
chrA07	16732100	16732600	500	hypo	0	32	49	8	0	85.96	1.67e-06	5	8	GSBRNA2T00099371001:promoter
chrA07	16921500	16922000	500	hypo	7	61	31	35	10.29	46.97	0.00039	6	8	GSBRNA2T00099418001:promoter
chrA07	17012800	17013300	500	hypo	0	182	25	63	0	28.41	3.29e-11	13	12	GSBRNA2T00099436001:promoter
chrA07	17109500	17110000	500	hypo	0	46	70	16	0	81.4	1.91e-08	5	9	GSBRNA2T00099460001:promoter
chrA07	17109500	17110000	500	hypo	0	46	70	16	0	81.4	1.91e-08	5	9	GSBRNA2T00099460001:promoter,GSBRNA2T00099461001:exon
chrA07	17225100	17225600	500	hypo	0	46	56	21	0	72.73	1.1e-07	6	7	GSBRNA2T00099494001:promoter
chrA07	17440400	17440900	500	hypo	0	57	114	5	0	95.8	1.21e-11	6	9	GSBRNA2T00099549001:promoter
chrA07	17622600	17623100	500	hypo	0	30	28	12	0	70	3.2e-05	6	5	GSBRNA2T00099589001:promoter
chrA07	17658700	17659200	500	hypo	0	56	57	4	0	93.44	2.26e-10	6	5	GSBRNA2T00099596001:promoter
chrA07	17922500	17923000	500	hypo	0	51	33	46	0	41.77	1.42e-05	7	10	GSBRNA2T00089387001:promoter
chrA07	18330300	18330800	500	hypo	0	63	23	11	0	67.65	2.05e-08	7	6	GSBRNA2T00124338001:exon
chrA07	18907000	18907500	500	hypo	8	65	36	14	10.96	72	2.74e-06	9	9	GSBRNA2T00124461001:exon,GSBRNA2T00124461001:exon
chrA07	19516700	19517200	500	hypo	8	36	64	10	18.18	86.49	8.63e-05	6	6	GSBRNA2T00102109001:promoter,GSBRNA2T00102108001:promoter
chrA07	19516700	19517200	500	hypo	8	36	64	10	18.18	86.49	8.63e-05	6	6	GSBRNA2T00102109001:promoter,GSBRNA2T00102108001:promoter,GSBRNA2T00102107001:exon,GSBRNA2T00102107001:exon
chrA07	19531800	19532300	500	hypo	0	77	138	63	0	68.66	7.45e-12	9	17	GSBRNA2T00102105001:promoter
chrA07	19531800	19532300	500	hypo	0	77	138	63	0	68.66	7.45e-12	9	17	GSBRNA2T00102105001:promoter,GSBRNA2T00102105001:exon
chrA07	19682000	19682500	500	hypo	35	62	36	6	36.08	85.71	0.00365	12	7	GSBRNA2T00102067001:promoter
chrA07	19682000	19682500	500	hypo	35	62	36	6	36.08	85.71	0.00365	12	7	GSBRNA2T00102067001:promoter,GSBRNA2T00102066001:exon
chrA07	20363100	20363600	500	hypo	0	74	37	13	0	74	1.63e-10	7	5	GSBRNA2T00101924001:promoter
chrA07	20363100	20363600	500	hypo	0	74	37	13	0	74	1.63e-10	7	5	GSBRNA2T00101924001:promoter,GSBRNA2T00101924001:exon,GSBRNA2T00101924001:exon
chrA07	20415800	20416300	500	hypo	0	57	19	29	0	39.58	1.25e-05	6	8	GSBRNA2T00066548001:promoter,GSBRNA2T00066547001:promoter
chrA07	20415800	20416300	500	hypo	0	57	19	29	0	39.58	1.25e-05	6	8	GSBRNA2T00066548001:promoter,GSBRNA2T00066547001:promoter,GSBRNA2T00066546001:exon,GSBRNA2T00066546001:exon
chrA07	20674400	20674900	500	hypo	0	54	20	28	0	41.67	1.31e-05	8	7	GSBRNA2T00066596001:promoter,GSBRNA2T00066595001:promoter,GSBRNA2T00066597001:promoter
chrA07	20674400	20674900	500	hypo	0	54	20	28	0	41.67	1.31e-05	8	7	GSBRNA2T00066596001:promoter,GSBRNA2T00066595001:promoter,GSBRNA2T00066597001:promoter,GSBRNA2T00066598001:exon,GSBRNA2T00066598001:exon,GSBRNA2T00066597001:exon
chrA07	20860000	20860500	500	hypo	0	82	17	38	0	30.91	3.08e-06	7	7	GSBRNA2T00102427001:promoter
chrA07	20949600	20950100	500	hypo	24	169	167	218	12.44	43.38	2.95e-08	19	23	GSBRNA2T00102449001:promoter
chrA07	20949600	20950100	500	hypo	24	169	167	218	12.44	43.38	2.95e-08	19	23	GSBRNA2T00102449001:promoter,GSBRNA2T00102450001:exon
chrA07	21421800	21422800	1000	hypo	44	350	370	177	11.17	67.64	9.73e-30	38	45	GSBRNA2T00102567001:promoter
chrA07	21521500	21522000	500	hypo	201	106	169	9	65.47	94.94	0.0081	15	8	GSBRNA2T00102592001:promoter,GSBRNA2T00102591001:promoter
chrA07	22137600	22138100	500	hypo	17	41	52	11	29.31	82.54	0.00158	8	9	GSBRNA2T00081918001:promoter
chrA07	23085100	23085600	500	hypo	18	80	75	23	18.37	76.53	6.87e-07	7	6	GSBRNA2T00146488001:promoter
chrA07	23085100	23085600	500	hypo	18	80	75	23	18.37	76.53	6.87e-07	7	6	GSBRNA2T00146488001:promoter,GSBRNA2T00146488001:exon
chrA07	23151100	23151600	500	hypo	6	30	29	4	16.67	87.88	0.000581	5	5	GSBRNA2T00146473001:exon
chrA07	23601500	23602000	500	hypo	11	40	24	12	21.57	66.67	0.00658	8	5	GSBRNA2T00146363001:exon
chrA07_random	56700	57700	1000	hypo	213	162	256	14	56.8	94.81	2.67e-05	31	27	GSBRNA2T00075412001:promoter
chrA07_random	325400	326400	1000	hypo	14	80	124	25	14.89	83.22	2.84e-09	12	14	GSBRNA2T00012072001:promoter
chrA07_random	325400	326400	1000	hypo	14	80	124	25	14.89	83.22	2.84e-09	12	14	GSBRNA2T00012072001:promoter,GSBRNA2T00012072001:exon
chrA07_random	746600	747600	1000	hypo	0	192	139	45	0	75.54	1.98e-26	16	17	GSBRNA2T00024877001:promoter
chrA07_random	746600	747600	1000	hypo	0	192	139	45	0	75.54	1.98e-26	16	17	GSBRNA2T00024877001:promoter,GSBRNA2T00024877001:exon
chrA07_random	769100	769600	500	hypo	0	28	54	1	0	98.18	1.71e-06	5	7	GSBRNA2T00024883001:promoter
chrA07_random	902000	902500	500	hypo	0	93	20	59	0	25.32	4.66e-06	8	7	GSBRNA2T00098309001:exon,GSBRNA2T00098309001:exon
chrA07_random	973700	974200	500	hypo	16	49	38	15	24.62	71.7	0.00191	9	7	GSBRNA2T00030498001:exon
chrA07_random	1203100	1203600	500	hypo	0	52	25	34	0	42.37	1.33e-05	6	5	GSBRNA2T00007689001:promoter,GSBRNA2T00007688001:promoter
chrA07_random	1431700	1432200	500	hypo	0	59	29	61	0	32.22	3.41e-05	10	13	GSBRNA2T00025143001:promoter
chrA07_random	1572700	1573700	1000	hypo	75	68	217	34	52.45	86.45	0.00317	19	26	GSBRNA2T00022539001:promoter
chrA07_random	1572700	1573700	1000	hypo	75	68	217	34	52.45	86.45	0.00317	19	26	GSBRNA2T00022539001:promoter,GSBRNA2T00022539001:exon
chrA07_random	1767100	1767600	500	hypo	39	46	71	1	45.88	98.61	0.00259	10	10	GSBRNA2T00019706001:promoter
chrA07_random	1827600	1828100	500	hypo	30	56	103	46	34.88	69.13	0.00536	10	12	GSBRNA2T00022750001:exon
chrA08	141800	142300	500	hypo	5	61	141	63	7.58	69.12	5.37e-08	5	17	GSBRNA2T00074686001:promoter
chrA08	200000	200500	500	hypo	0	51	38	29	0	56.72	7.82e-07	8	12	GSBRNA2T00074672001:promoter,GSBRNA2T00074671001:promoter,GSBRNA2T00074670001:promoter
chrA08	265800	266300	500	hypo	15	35	48	5	30	90.57	0.00153	7	8	GSBRNA2T00074654001:exon
chrA08	287600	288100	500	hypo	0	59	29	5	0	85.29	2.39e-09	6	5	GSBRNA2T00114054001:promoter
chrA08	1083100	1083600	500	hypo	2	99	45	52	1.98	46.39	5.3e-09	11	11	GSBRNA2T00114205001:intron
chrA08	1421500	1422000	500	hypo	5	60	114	27	7.69	80.85	7.54e-09	8	6	GSBRNA2T00114250001:exon
chrA08	1475100	1475600	500	hypo	1	25	36	11	3.85	76.6	0.000151	5	7	GSBRNA2T00085753001:exon,GSBRNA2T00085753001:exon
chrA08	2179100	2180100	1000	hypo	13	204	209	30	5.99	87.45	4.74e-27	13	13	GSBRNA2T00091084001:promoter
chrA08	2179100	2180100	1000	hypo	13	204	209	30	5.99	87.45	4.74e-27	13	13	GSBRNA2T00091084001:promoter,GSBRNA2T00091084001:exon
chrA08	2285800	2286800	1000	hypo	62	100	121	3	38.27	97.58	1.48e-06	19	15	GSBRNA2T00091065001:promoter
chrA08	2285800	2286800	1000	hypo	62	100	121	3	38.27	97.58	1.48e-06	19	15	GSBRNA2T00091065001:promoter,GSBRNA2T00091065001:exon,GSBRNA2T00091065001:exon,GSBRNA2T00091066001:exon,GSBRNA2T00091066001:exon
chrA08	2476000	2476500	500	hypo	0	39	33	61	0	35.11	0.000376	5	10	GSBRNA2T00091029001:promoter
chrA08	2590400	2590900	500	hypo	4	36	45	15	10	75	6.28e-05	5	9	GSBRNA2T00091014001:promoter
chrA08	2920700	2921200	500	hypo	0	37	75	49	0	60.48	6.15e-06	5	13	GSBRNA2T00094940001:promoter
chrA08	2920700	2921200	500	hypo	0	37	75	49	0	60.48	6.15e-06	5	13	GSBRNA2T00094940001:promoter,GSBRNA2T00094940001:exon,GSBRNA2T00094939001:exon
chrA08	3047700	3048200	500	hypo	0	46	49	7	0	87.5	1.73e-08	5	6	GSBRNA2T00094962001:promoter
chrA08	3136300	3137300	1000	hypo	0	100	285	36	0	88.79	6.64e-19	14	29	GSBRNA2T00094980001:promoter
chrA08	3136300	3137300	1000	hypo	0	100	285	36	0	88.79	6.64e-19	14	29	GSBRNA2T00094980001:promoter,GSBRNA2T00094980001:exon
chrA08	4301700	4302200	500	hypo	2	47	50	0	4.08	100	1.74e-08	7	5	GSBRNA2T00059286001:intron
chrA08	4853400	4853900	500	hypo	0	48	42	0	0	100	2.98e-09	8	7	GSBRNA2T00056950001:promoter
chrA08	4853400	4853900	500	hypo	0	48	42	0	0	100	2.98e-09	8	7	GSBRNA2T00056950001:promoter,GSBRNA2T00056950001:exon,GSBRNA2T00056950001:exon
chrA08	4879400	4879900	500	hypo	4	76	41	11	5	78.85	1.98e-09	8	7	GSBRNA2T00056954001:exon
chrA08	5075500	5076500	1000	hypo	24	70	75	2	25.53	97.4	9.32e-07	10	11	GSBRNA2T00077183001:exon
chrA08	5373700	5374200	500	hypo	37	93	175	31	28.46	84.95	1.44e-07	11	11	GSBRNA2T00086802001:promoter,GSBRNA2T00086801001:promoter,GSBRNA2T00086804001:promoter
chrA08	5469700	5470200	500	hypo	5	39	82	1	11.36	98.8	7.73e-07	5	8	GSBRNA2T00021027001:promoter
chrA08	5606300	5607300	1000	hypo	127	163	180	39	43.79	82.19	1.56e-05	20	18	GSBRNA2T00021049001:promoter
chrA08	5650000	5650500	500	hypo	41	83	61	21	33.06	74.39	0.000926	7	7	GSBRNA2T00021055001:intron
chrA08	5767500	5768000	500	hypo	0	44	32	2	0	94.12	4.13e-08	5	5	GSBRNA2T00021078001:exon
chrA08	5771500	5772000	500	hypo	44	114	116	12	27.85	90.62	1.64e-08	12	10	GSBRNA2T00021079001:promoter
chrA08	5997900	5998400	500	hypo	0	89	39	11	0	78	1.58e-12	8	7	GSBRNA2T00021110001:promoter
chrA08	6083400	6084400	1000	hypo	55	64	106	11	46.22	90.6	0.00134	17	15	GSBRNA2T00073853001:promoter
chrA08	6460300	6461300	1000	hypo	23	126	170	9	15.44	94.97	4.01e-15	10	14	GSBRNA2T00084029001:promoter
chrA08	6681800	6682300	500	hypo	0	163	122	245	0	33.24	1.52e-12	5	10	GSBRNA2T00081147001:exon
chrA08	6994700	6996400	1700	hypo	39	119	497	39	24.68	92.72	2.06e-13	15	32	GSBRNA2T00073598001:promoter
chrA08	6994700	6996400	1700	hypo	39	119	497	39	24.68	92.72	2.06e-13	15	32	GSBRNA2T00073598001:promoter,GSBRNA2T00073598001:exon,GSBRNA2T00073598001:exon
chrA08	6998200	6998700	500	hypo	0	39	57	6	0	90.48	7.71e-08	6	6	GSBRNA2T00073599001:promoter
chrA08	6998200	6998700	500	hypo	0	39	57	6	0	90.48	7.71e-08	6	6	GSBRNA2T00073599001:promoter,GSBRNA2T00073598001:exon
chrA08	7649000	7649500	500	hypo	0	56	38	2	0	95	6.79e-10	7	5	GSBRNA2T00036978001:exon,GSBRNA2T00036978001:exon
chrA08	7694200	7694700	500	hypo	3	88	126	95	3.3	57.01	3.82e-10	11	17	GSBRNA2T00036986001:promoter
chrA08	7841100	7841600	500	hypo	0	84	29	48	0	37.66	1.91e-07	12	7	GSBRNA2T00037008001:exon
chrA08	8063200	8063700	500	hypo	15	35	84	14	30	85.71	0.00112	8	9	GSBRNA2T00127022001:promoter,GSBRNA2T00127021001:promoter
chrA08	8069500	8070000	500	hypo	0	35	72	6	0	92.31	1.57e-07	5	8	GSBRNA2T00127019001:exon,GSBRNA2T00127019001:exon,GSBRNA2T00127019001:exon
chrA08	8357100	8358100	1000	hypo	67	187	188	29	26.38	86.64	7.97e-13	18	18	GSBRNA2T00126977001:exon,GSBRNA2T00126977001:exon,GSBRNA2T00126977001:exon
chrA08	8522200	8522700	500	hypo	0	53	55	45	0	55	4.27e-07	5	11	GSBRNA2T00126948001:promoter
chrA08	8821300	8821800	500	hypo	43	54	70	5	44.33	93.33	0.00245	5	5	GSBRNA2T00126898001:promoter
chrA08	8936000	8936500	500	hypo	0	58	68	5	0	93.15	7.1e-11	5	5	GSBRNA2T00126883001:exon
chrA08	8955900	8957600	1700	hypo	0	199	66	181	0	26.72	3.91e-12	26	28	GSBRNA2T00126876001:promoter,GSBRNA2T00126874001:promoter,GSBRNA2T00126875001:promoter
chrA08	8955900	8957600	1700	hypo	0	199	66	181	0	26.72	3.91e-12	26	28	GSBRNA2T00126876001:promoter,GSBRNA2T00126874001:promoter,GSBRNA2T00126875001:promoter,GSBRNA2T00126876001:exon,GSBRNA2T00126874001:exon,GSBRNA2T00126874001:exon,GSBRNA2T00126875001:exon,GSBRNA2T00126875001:exon
chrA08	9051300	9051800	500	hypo	0	34	77	18	0	81.05	8.22e-07	6	9	GSBRNA2T00126864001:promoter
chrA08	9051300	9051800	500	hypo	0	34	77	18	0	81.05	8.22e-07	6	9	GSBRNA2T00126864001:promoter,GSBRNA2T00126863001:exon
chrA08	9119000	9119500	500	hypo	34	38	57	2	47.22	96.61	0.00983	7	8	GSBRNA2T00126852001:intron
chrA08	9163800	9164800	1000	hypo	37	84	274	13	30.58	95.47	1.21e-08	16	26	GSBRNA2T00126844001:promoter
chrA08	9175500	9176000	500	hypo	18	45	158	20	28.57	88.76	4.97e-05	7	22	GSBRNA2T00126842001:promoter
chrA08	9527500	9528000	500	hypo	0	58	37	33	0	52.86	3.68e-07	6	10	GSBRNA2T00126767001:promoter
chrA08	9527500	9528000	500	hypo	0	58	37	33	0	52.86	3.68e-07	6	10	GSBRNA2T00126767001:promoter,GSBRNA2T00126767001:exon
chrA08	9655600	9656100	500	hypo	4	31	180	63	11.43	74.07	8.07e-05	4	16	GSBRNA2T00126745001:promoter,GSBRNA2T00126744001:promoter
chrA08	10126900	10127400	500	hypo	53	104	136	4	33.76	97.14	7.26e-08	9	9	GSBRNA2T00126669001:promoter
chrA08	10185600	10186600	1000	hypo	61	64	99	5	48.8	95.19	0.00138	17	12	GSBRNA2T00126653001:promoter
chrA08	10636900	10637400	500	hypo	8	109	72	12	6.84	85.71	2.16e-13	11	6	GSBRNA2T00081284001:promoter
chrA08	11126900	11128400	1500	hypo	72	95	187	20	43.11	90.34	1.7e-05	19	18	GSBRNA2T00021861001:promoter,GSBRNA2T00021863001:promoter
chrA08	11219200	11219700	500	hypo	13	76	40	18	14.61	68.97	6.9e-06	9	8	GSBRNA2T00021844001:exon,GSBRNA2T00021844001:exon,GSBRNA2T00021844001:exon
chrA08	11916900	11917400	500	hypo	15	26	58	5	36.59	92.06	0.00786	6	5	GSBRNA2T00078841001:exon
chrA08	12133800	12134300	500	hypo	40	56	89	20	41.67	81.65	0.00416	11	7	GSBRNA2T00078887001:promoter
chrA08	12435700	12436200	500	hypo	0	160	22	83	0	20.95	4.28e-08	13	10	GSBRNA2T00027300001:promoter
chrA08	12435700	12436200	500	hypo	0	160	22	83	0	20.95	4.28e-08	13	10	GSBRNA2T00027300001:promoter,GSBRNA2T00027300001:exon
chrA08	13553400	13554400	1000	hypo	30	166	195	18	15.31	91.55	3.3e-18	19	14	GSBRNA2T00150885001:promoter
chrA08	13637000	13637500	500	hypo	0	31	130	14	0	90.28	4.13e-07	5	5	GSBRNA2T00150860001:promoter
chrA08	13646100	13646600	500	hypo	4	127	27	67	3.05	28.72	2.16e-06	17	9	GSBRNA2T00150859001:promoter
chrA08	13801900	13802400	500	hypo	0	54	48	40	0	54.55	4.42e-07	7	7	GSBRNA2T00150816001:exon,GSBRNA2T00150816001:exon
chrA08	13977800	13978300	500	hypo	5	52	41	11	8.77	78.85	1.52e-06	8	6	GSBRNA2T00150786001:promoter
chrA08	14344500	14345000	500	hypo	124	84	139	9	59.62	93.92	0.00541	15	16	GSBRNA2T00150691001:promoter
chrA08	14365300	14365800	500	hypo	5	178	40	82	2.73	32.79	8.26e-10	13	12	GSBRNA2T00150687001:promoter
chrA08	14599400	14599900	500	hypo	1	49	97	44	2	68.79	1.09e-07	7	14	GSBRNA2T00150623001:promoter
chrA08	14600400	14600900	500	hypo	6	78	66	5	7.14	92.96	4.91e-11	5	8	GSBRNA2T00150623001:promoter
chrA08	14693200	14693700	500	hypo	0	37	48	0	0	100	7.44e-08	6	6	GSBRNA2T00150606001:exon
chrA08	14723600	14724100	500	hypo	0	53	67	41	0	62.04	8.3e-08	7	14	GSBRNA2T00059987001:promoter,GSBRNA2T00059988001:promoter
chrA08	14723600	14724100	500	hypo	0	53	67	41	0	62.04	8.3e-08	7	14	GSBRNA2T00059987001:promoter,GSBRNA2T00059988001:promoter,GSBRNA2T00059987001:exon,GSBRNA2T00059988001:exon
chrA08	14817600	14818100	500	hypo	62	188	62	34	24.8	64.58	6.76e-06	12	11	GSBRNA2T00059969001:exon,GSBRNA2T00059969001:exon,GSBRNA2T00059969001:exon
chrA08	15036500	15037000	500	hypo	0	112	16	9	0	64	2.82e-12	12	5	GSBRNA2T00059922001:promoter,GSBRNA2T00059923001:promoter
chrA08	15036500	15037000	500	hypo	0	112	16	9	0	64	2.82e-12	12	5	GSBRNA2T00059922001:promoter,GSBRNA2T00059923001:promoter,GSBRNA2T00059923001:exon
chrA08	15048800	15049800	1000	hypo	2	75	103	119	2.6	46.4	1.16e-07	13	26	GSBRNA2T00059918001:promoter
chrA08	15361500	15362000	500	hypo	2	161	28	29	1.23	49.12	2.61e-13	14	9	GSBRNA2T00020791001:promoter
chrA08	15361500	15362000	500	hypo	2	161	28	29	1.23	49.12	2.61e-13	14	9	GSBRNA2T00020791001:promoter,GSBRNA2T00020791001:exon,GSBRNA2T00020791001:exon
chrA08	15402000	15403000	1000	hypo	0	138	156	102	0	60.47	1.68e-17	13	16	GSBRNA2T00073033001:promoter
chrA08	15406800	15407300	500	hypo	114	107	148	34	51.58	81.32	0.00431	18	14	GSBRNA2T00073036001:promoter,GSBRNA2T00073035001:promoter
chrA08	15617600	15618100	500	hypo	9	36	45	7	20	86.54	0.00026	5	6	GSBRNA2T00073096001:promoter
chrA08	15856500	15857000	500	hypo	0	41	45	5	0	90	7.15e-08	5	6	GSBRNA2T00102796001:exon
chrA08	15950200	15950700	500	hypo	25	74	29	8	25.25	78.38	0.00054	9	5	GSBRNA2T00102821001:promoter
chrA08	16115100	16115600	500	hypo	2	39	56	14	4.88	80	2.08e-06	6	8	GSBRNA2T00102858001:exon
chrA08	16427300	16428800	1500	hypo	91	132	340	19	40.81	94.71	4.82e-09	26	34	GSBRNA2T00102950001:exon,GSBRNA2T00102950001:exon,GSBRNA2T00102950001:exon,GSBRNA2T00102950001:exon
chrA08	16744500	16745000	500	hypo	0	54	53	13	0	80.3	3.9e-09	7	6	GSBRNA2T00103051001:exon
chrA08	17259800	17260800	1000	hypo	10	111	64	77	8.26	45.39	3.61e-07	14	14	GSBRNA2T00015203001:promoter,GSBRNA2T00015201001:promoter
chrA08	17259800	17260800	1000	hypo	10	111	64	77	8.26	45.39	3.61e-07	14	14	GSBRNA2T00015203001:promoter,GSBRNA2T00015201001:promoter,GSBRNA2T00015202001:exon
chrA08	17398000	17398500	500	hypo	0	34	54	61	0	46.96	0.000119	5	11	GSBRNA2T00015160001:promoter
chrA08	17398000	17398500	500	hypo	0	34	54	61	0	46.96	0.000119	5	11	GSBRNA2T00015160001:promoter,GSBRNA2T00015159001:exon,GSBRNA2T00015160001:exon
chrA08	17537200	17537700	500	hypo	26	64	122	42	28.89	74.39	0.000137	8	8	GSBRNA2T00015121001:promoter
chrA08	17662600	17663100	500	hypo	0	85	36	12	0	75	1.02e-11	10	7	GSBRNA2T00015091001:exon,GSBRNA2T00015091001:exon,GSBRNA2T00015091001:exon
chrA08	17749100	17749600	500	hypo	18	102	35	12	15	74.47	6.67e-07	9	7	GSBRNA2T00047128001:exon
chrA08	17935600	17936100	500	hypo	52	121	49	21	30.06	70	0.000466	17	10	GSBRNA2T00047189001:exon,GSBRNA2T00047189001:exon
chrA08	18062500	18063000	500	hypo	42	39	341	34	51.85	90.93	0.00556	5	5	GSBRNA2T00047222001:exon,GSBRNA2T00047222001:exon
chrA08	18133400	18133900	500	hypo	3	31	57	4	8.82	93.44	1.19e-05	5	8	GSBRNA2T00047237001:promoter
chrA08	18137200	18137700	500	hypo	6	54	36	13	10	73.47	6.05e-06	6	7	GSBRNA2T00047238001:promoter
chrA08	18284100	18284600	500	hypo	13	72	98	17	15.29	85.22	2.15e-08	8	8	GSBRNA2T00089624001:promoter,GSBRNA2T00089625001:promoter,GSBRNA2T00089626001:promoter
chrA08	18493300	18494300	1000	hypo	0	157	177	63	0	73.75	9.62e-23	19	22	GSBRNA2T00089685001:promoter
chrA08	18493300	18494300	1000	hypo	0	157	177	63	0	73.75	9.62e-23	19	22	GSBRNA2T00089685001:promoter,GSBRNA2T00089685001:exon,GSBRNA2T00089685001:exon
chrA08	18549500	18550500	1000	hypo	64	65	123	19	49.61	86.62	0.00438	17	16	GSBRNA2T00089700001:promoter,GSBRNA2T00089702001:promoter
chrA08	18549500	18550500	1000	hypo	64	65	123	19	49.61	86.62	0.00438	17	16	GSBRNA2T00089700001:promoter,GSBRNA2T00089702001:promoter,GSBRNA2T00089701001:exon,GSBRNA2T00089701001:exon
chrA08	18953300	18953800	500	hypo	3	73	35	27	3.95	56.45	2.25e-07	6	8	GSBRNA2T00089817001:exon
chrA08_random	74000	74500	500	hypo	1	55	18	18	1.79	50	1.01e-05	8	6	GSBRNA2T00017674001:exon
chrA08_random	205600	206100	500	hypo	24	85	125	19	22.02	86.81	2.83e-08	7	8	GSBRNA2T00097247001:promoter
chrA08_random	393400	393900	500	hypo	0	63	93	109	0	46.04	2.22e-07	5	21	GSBRNA2T00026011001:promoter
chrA08_random	932800	933300	500	hypo	0	52	90	3	0	96.77	1.21e-10	8	11	GSBRNA2T00053496001:exon
chrA08_random	1063600	1064100	500	hypo	29	42	53	8	40.85	86.89	0.00864	5	10	GSBRNA2T00092909001:promoter
chrA08_random	1063600	1064100	500	hypo	29	42	53	8	40.85	86.89	0.00864	5	10	GSBRNA2T00092909001:promoter,GSBRNA2T00092909001:exon
chrA08_random	1561800	1562300	500	hypo	0	83	20	52	0	27.78	6.38e-06	8	11	GSBRNA2T00042346001:exon
chrA09	634500	635000	500	hypo	105	119	98	8	46.88	92.45	0.000194	17	10	GSBRNA2T00018469001:promoter
chrA09	634500	635000	500	hypo	105	119	98	8	46.88	92.45	0.000194	17	10	GSBRNA2T00018469001:promoter,GSBRNA2T00018469001:exon
chrA09	853500	854000	500	hypo	12	54	41	23	18.18	64.06	0.000483	9	8	GSBRNA2T00091295001:exon,GSBRNA2T00091295001:exon
chrA09	2237400	2237900	500	hypo	14	68	53	7	17.07	88.33	6.06e-07	13	9	GSBRNA2T00009551001:exon
chrA09	2394200	2394700	500	hypo	44	65	62	5	40.37	92.54	0.000855	6	6	GSBRNA2T00009596001:exon
chrA09	2401500	2402000	500	hypo	36	76	64	15	32.14	81.01	0.000244	7	6	GSBRNA2T00009597001:exon
chrA09	2607500	2608000	500	hypo	23	47	70	8	32.86	89.74	0.00046	6	6	GSBRNA2T00094736001:promoter,GSBRNA2T00094737001:promoter
chrA09	3050800	3051300	500	hypo	1	92	33	31	1.08	51.56	2.64e-09	14	9	GSBRNA2T00094638001:promoter
chrA09	3251300	3252900	1600	hypo	148	151	304	14	49.5	95.6	2.65e-07	20	26	GSBRNA2T00094583001:promoter
chrA09	3251300	3252900	1600	hypo	148	151	304	14	49.5	95.6	2.65e-07	20	26	GSBRNA2T00094583001:promoter,GSBRNA2T00094583001:exon
chrA09	3281900	3282400	500	hypo	4	34	43	11	10.53	79.63	6.8e-05	5	7	GSBRNA2T00005813001:promoter
chrA09	3334700	3335200	500	hypo	5	41	58	2	10.87	96.67	1.2e-06	6	9	GSBRNA2T00005795001:promoter,GSBRNA2T00005794001:promoter,GSBRNA2T00005793001:promoter
chrA09	3334700	3335200	500	hypo	5	41	58	2	10.87	96.67	1.2e-06	6	9	GSBRNA2T00005795001:promoter,GSBRNA2T00005794001:promoter,GSBRNA2T00005793001:promoter,GSBRNA2T00005794001:exon,GSBRNA2T00005794001:exon,GSBRNA2T00005794001:exon
chrA09	3596400	3596900	500	hypo	0	39	74	6	0	92.5	3.53e-08	6	9	GSBRNA2T00005740001:promoter
chrA09	3769000	3769500	500	hypo	94	92	85	1	50.54	98.84	0.000678	23	13	GSBRNA2T00005684001:promoter,GSBRNA2T00005685001:promoter
chrA09	4160100	4160600	500	hypo	10	35	45	5	22.22	90	0.000351	5	5	GSBRNA2T00063708001:promoter
chrA09	4184500	4185000	500	hypo	0	26	20	48	0	29.41	0.00743	5	8	GSBRNA2T00063713001:exon,GSBRNA2T00063713001:exon
chrA09	4287100	4287600	500	hypo	0	49	111	21	0	84.09	1.87e-09	7	15	GSBRNA2T00063723001:promoter
chrA09	4355500	4356000	500	hypo	0	38	44	25	0	63.77	4.89e-06	5	8	GSBRNA2T00087514001:exon
chrA09	5119500	5120000	500	hypo	6	43	181	89	12.24	67.04	2.24e-05	9	26	GSBRNA2T00091625001:promoter,GSBRNA2T00091626001:promoter
chrA09	5119500	5120000	500	hypo	6	43	181	89	12.24	67.04	2.24e-05	9	26	GSBRNA2T00091625001:promoter,GSBRNA2T00091626001:promoter,GSBRNA2T00091626001:exon
chrA09	5323300	5323800	500	hypo	6	40	38	2	13.04	95	1.14e-05	7	7	GSBRNA2T00068596001:promoter,GSBRNA2T00068597001:promoter
chrA09	5550500	5551000	500	hypo	19	46	48	9	29.23	84.21	0.000973	7	6	GSBRNA2T00092562001:promoter
chrA09	5608600	5609100	500	hypo	0	64	33	15	0	68.75	6.25e-09	5	6	GSBRNA2T00056394001:promoter
chrA09	5781800	5783300	1500	hypo	8	124	192	27	6.06	87.67	2.95e-18	21	28	GSBRNA2T00056434001:exon,GSBRNA2T00056434001:exon,GSBRNA2T00056434001:exon
chrA09	5956700	5957200	500	hypo	0	117	30	29	0	50.85	1.09e-11	12	7	GSBRNA2T00056490001:promoter
chrA09	6181700	6182200	500	hypo	8	66	25	28	10.81	47.17	0.000494	8	7	GSBRNA2T00065522001:exon
chrA09	6211800	6212300	500	hypo	7	42	65	10	14.29	86.67	8.54e-06	6	7	GSBRNA2T00065517001:exon
chrA09	6479700	6482200	2500	hypo	2	173	457	73	1.14	86.23	1e-29	19	25	GSBRNA2T00088327001:promoter,GSBRNA2T00088326001:promoter
chrA09	6479700	6482200	2500	hypo	2	173	457	73	1.14	86.23	1e-29	19	25	GSBRNA2T00088327001:promoter,GSBRNA2T00088326001:promoter,GSBRNA2T00088326001:exon
chrA09	6779600	6780100	500	hypo	0	79	82	31	0	72.57	5.76e-12	7	15	GSBRNA2T00086394001:promoter
chrA09	6838500	6839000	500	hypo	7	63	39	2	10	95.12	4.81e-08	8	6	GSBRNA2T00086385001:exon
chrA09	6858400	6858900	500	hypo	0	30	28	14	0	66.67	4.46e-05	5	6	GSBRNA2T00086384001:exon
chrA09	7092700	7093200	500	hypo	0	49	58	8	0	87.88	4.31e-09	6	6	GSBRNA2T00082969001:exon,GSBRNA2T00082969001:exon,GSBRNA2T00082969001:exon
chrA09	7553500	7554000	500	hypo	8	34	106	33	19.05	76.26	0.000308	5	17	GSBRNA2T00070606001:promoter
chrA09	7553500	7554000	500	hypo	8	34	106	33	19.05	76.26	0.000308	5	17	GSBRNA2T00070606001:promoter,GSBRNA2T00070607001:exon
chrA09	8419600	8420100	500	hypo	88	74	147	14	54.32	91.3	0.00288	9	9	GSBRNA2T00091892001:promoter
chrA09	9153400	9153900	500	hypo	33	77	49	14	30	77.78	0.000452	11	5	GSBRNA2T00006804001:promoter
chrA09	9153400	9153900	500	hypo	33	77	49	14	30	77.78	0.000452	11	5	GSBRNA2T00006804001:promoter,GSBRNA2T00006804001:exon
chrA09	9378300	9379300	1000	hypo	209	121	274	36	63.33	88.39	0.0059	22	21	GSBRNA2T00074631001:promoter
chrA09	9505300	9505800	500	hypo	9	93	130	12	8.82	91.55	2.34e-13	5	9	GSBRNA2T00074652001:exon,GSBRNA2T00074652001:exon
chrA09	10224300	10224800	500	hypo	0	55	18	68	0	20.93	0.00105	6	11	GSBRNA2T00070975001:promoter
chrA09	10395500	10396000	500	hypo	4	84	18	65	4.55	21.69	0.00326	8	8	GSBRNA2T00070941001:promoter
chrA09	10395500	10396000	500	hypo	4	84	18	65	4.55	21.69	0.00326	8	8	GSBRNA2T00070941001:promoter,GSBRNA2T00070941001:exon,GSBRNA2T00070941001:exon
chrA09	10569000	10570000	1000	hypo	110	118	140	14	48.25	90.91	0.000111	23	13	GSBRNA2T00070903001:promoter
chrA09	10569000	10570000	1000	hypo	110	118	140	14	48.25	90.91	0.000111	23	13	GSBRNA2T00070903001:promoter,GSBRNA2T00070903001:exon,GSBRNA2T00070903001:exon
chrA09	11118200	11118700	500	hypo	0	36	28	4	0	87.5	1.12e-06	5	5	GSBRNA2T00058058001:exon
chrA09	11120400	11120900	500	hypo	0	49	44	4	0	91.67	5.33e-09	6	7	GSBRNA2T00058058001:exon
chrA09	11599600	11600100	500	hypo	0	35	95	5	0	95	7.05e-08	6	9	GSBRNA2T00072411001:intron
chrA09	11785200	11785700	500	hypo	0	36	44	3	0	93.62	2.46e-07	5	6	GSBRNA2T00117750001:exon
chrA09	11796500	11797000	500	hypo	0	40	50	5	0	90.91	6.97e-08	5	8	GSBRNA2T00117752001:exon
chrA09	11909100	11909600	500	hypo	0	31	103	12	0	89.57	5.79e-07	5	17	GSBRNA2T00117777001:promoter
chrA09	11909100	11909600	500	hypo	0	31	103	12	0	89.57	5.79e-07	5	17	GSBRNA2T00117777001:promoter,GSBRNA2T00117777001:exon
chrA09	13333500	13334500	1000	hypo	91	111	133	20	45.05	86.93	0.000136	13	16	GSBRNA2T00094509001:promoter
chrA09	13336600	13337100	500	hypo	0	61	41	12	0	77.36	1.8e-09	9	7	GSBRNA2T00094509001:exon,GSBRNA2T00094509001:exon
chrA09	13894900	13895400	500	hypo	0	27	53	0	0	100	2.16e-06	5	9	GSBRNA2T00145432001:promoter
chrA09	13894900	13895400	500	hypo	0	27	53	0	0	100	2.16e-06	5	9	GSBRNA2T00145432001:promoter,GSBRNA2T00145432001:exon
chrA09	14458200	14458700	500	hypo	29	59	56	21	32.95	72.73	0.00392	12	8	GSBRNA2T00145527001:promoter
chrA09	14467800	14468300	500	hypo	0	55	60	26	0	69.77	1.38e-08	9	10	GSBRNA2T00145529001:exon,GSBRNA2T00145529001:exon
chrA09	14570700	14571200	500	hypo	0	59	69	42	0	62.16	1.71e-08	9	9	GSBRNA2T00145542001:exon
chrA09	16727100	16727600	500	hypo	1	43	44	13	2.27	77.19	5.87e-07	5	7	GSBRNA2T00156573001:promoter
chrA09	16727100	16727600	500	hypo	1	43	44	13	2.27	77.19	5.87e-07	5	7	GSBRNA2T00156573001:promoter,GSBRNA2T00156573001:exon
chrA09	17193700	17194700	1000	hypo	29	107	397	56	21.32	87.64	3.96e-12	12	30	GSBRNA2T00156642001:promoter
chrA09	17390000	17390500	500	hypo	0	31	79	12	0	86.81	1.11e-06	6	12	GSBRNA2T00061314001:exon
chrA09	17582100	17582600	500	hypo	0	47	126	19	0	86.9	1.79e-09	6	9	GSBRNA2T00061342001:promoter
chrA09	17635200	17635700	500	hypo	11	40	154	20	21.57	88.51	1.96e-05	7	10	GSBRNA2T00061351001:promoter
chrA09	17646900	17647400	500	hypo	0	32	88	21	0	80.73	1.45e-06	5	11	GSBRNA2T00061355001:promoter
chrA09	17646900	17647400	500	hypo	0	32	88	21	0	80.73	1.45e-06	5	11	GSBRNA2T00061355001:promoter,GSBRNA2T00061355001:exon
chrA09	18195000	18195500	500	hypo	2	35	62	16	5.41	79.49	6.41e-06	5	7	GSBRNA2T00092416001:exon,GSBRNA2T00092416001:exon,GSBRNA2T00092416001:exon
chrA09	18678600	18679600	1000	hypo	0	209	402	52	0	88.55	3.66e-36	18	24	GSBRNA2T00113817001:exon,GSBRNA2T00113817001:exon
chrA09	18681000	18681500	500	hypo	4	55	43	12	6.78	78.18	3.19e-07	8	5	GSBRNA2T00113817001:promoter
chrA09	20035700	20036700	1000	hypo	80	120	133	5	40	96.38	7.75e-07	19	15	GSBRNA2T00089301001:exon
chrA09	20150100	20150600	500	hypo	0	61	75	23	0	76.53	4.42e-10	9	12	GSBRNA2T00055988001:promoter
chrA09	20547800	20548300	500	hypo	8	41	83	41	16.33	66.94	0.000246	5	6	GSBRNA2T00085889001:intron
chrA09	20753200	20753700	500	hypo	0	26	59	2	0	96.72	3.63e-06	5	5	GSBRNA2T00038397001:exon
chrA09	21194400	21195400	1000	hypo	7	84	217	46	7.69	82.51	1.81e-12	12	19	GSBRNA2T00038308001:promoter
chrA09	21455000	21455500	500	hypo	46	58	43	5	44.23	89.58	0.0097	13	6	GSBRNA2T00074278001:intron
chrA09	21499000	21499500	500	hypo	22	41	94	5	34.92	94.95	0.000377	5	9	GSBRNA2T00074268001:promoter
chrA09	21499000	21499500	500	hypo	22	41	94	5	34.92	94.95	0.000377	5	9	GSBRNA2T00074268001:promoter,GSBRNA2T00074269001:exon,GSBRNA2T00074269001:exon,GSBRNA2T00074269001:exon
chrA09	21546100	21547100	1000	hypo	96	178	159	20	35.04	88.83	5.21e-09	17	17	GSBRNA2T00090560001:promoter
chrA09	21780300	21781300	1000	hypo	6	97	158	15	5.83	91.33	2.61e-15	14	20	GSBRNA2T00090599001:promoter
chrA09	21780300	21781300	1000	hypo	6	97	158	15	5.83	91.33	2.61e-15	14	20	GSBRNA2T00090599001:promoter,GSBRNA2T00090599001:exon
chrA09	22129400	22129900	500	hypo	0	29	57	8	0	87.69	3.08e-06	5	6	GSBRNA2T00090679001:promoter
chrA09	22142200	22142700	500	hypo	12	86	39	69	12.24	36.11	0.00189	12	13	GSBRNA2T00090681001:promoter
chrA09	22164000	22164500	500	hypo	1	31	55	24	3.12	69.62	3.42e-05	5	6	GSBRNA2T00090685001:intron
chrA09	22459500	22460000	500	hypo	44	80	96	30	35.48	76.19	0.000508	15	16	GSBRNA2T00015798001:promoter
chrA09	22459500	22460000	500	hypo	44	80	96	30	35.48	76.19	0.000508	15	16	GSBRNA2T00015798001:promoter,GSBRNA2T00015797001:exon
chrA09	22483500	22484000	500	hypo	0	125	113	115	0	49.56	1.42e-13	12	15	GSBRNA2T00015790001:promoter
chrA09	22521600	22522100	500	hypo	0	39	28	11	0	71.79	2.52e-06	5	7	GSBRNA2T00015779001:promoter
chrA09	22659400	22659900	500	hypo	3	27	60	18	10	76.92	0.000234	5	12	GSBRNA2T00015751001:promoter
chrA09	23130200	23130700	500	hypo	0	81	57	45	0	55.88	6.78e-10	8	11	GSBRNA2T00079597001:promoter
chrA09	24161100	24162500	1400	hypo	0	96	466	33	0	93.39	9.71e-20	14	28	GSBRNA2T00129358001:promoter
chrA09	24208000	24208500	500	hypo	2	168	47	79	1.18	37.3	4.57e-12	9	9	GSBRNA2T00129371001:promoter
chrA09	24318700	24319200	500	hypo	10	28	135	15	26.32	90	0.000603	7	11	GSBRNA2T00129386001:promoter
chrA09	24698700	24699200	500	hypo	0	40	34	10	0	77.27	7.46e-07	6	6	GSBRNA2T00129458001:promoter
chrA09	24698700	24699200	500	hypo	0	40	34	10	0	77.27	7.46e-07	6	6	GSBRNA2T00129458001:promoter,GSBRNA2T00129457001:exon
chrA09	24729000	24730000	1000	hypo	80	141	207	20	36.2	91.19	7.89e-09	20	24	GSBRNA2T00129462001:promoter
chrA09	24729000	24730000	1000	hypo	80	141	207	20	36.2	91.19	7.89e-09	20	24	GSBRNA2T00129462001:promoter,GSBRNA2T00129462001:exon,GSBRNA2T00129462001:exon
chrA09	25402100	25402600	500	hypo	0	32	50	19	0	72.46	7.34e-06	5	8	GSBRNA2T00129618001:exon,GSBRNA2T00129618001:exon
chrA09	25472900	25473400	500	hypo	0	102	167	111	0	60.07	1.14e-13	7	18	GSBRNA2T00069348001:promoter
chrA09	25607000	25607500	500	hypo	23	35	110	20	39.66	84.62	0.00587	8	12	GSBRNA2T00069374001:promoter,GSBRNA2T00069376001:promoter
chrA09	25607000	25607500	500	hypo	23	35	110	20	39.66	84.62	0.00587	8	12	GSBRNA2T00069374001:promoter,GSBRNA2T00069376001:promoter,GSBRNA2T00069375001:exon
chrA09	25838400	25839400	1000	hypo	5	105	88	8	4.55	91.67	2.76e-15	12	12	GSBRNA2T00037136001:exon,GSBRNA2T00037136001:exon
chrA09	26491200	26491700	500	hypo	56	83	98	22	40.29	81.67	0.000658	13	14	GSBRNA2T00121986001:exon,GSBRNA2T00121986001:exon
chrA09	26626800	26627300	500	hypo	0	71	47	17	0	73.44	1.94e-10	6	5	GSBRNA2T00121963001:promoter
chrA09	26786600	26787100	500	hypo	11	32	56	17	25.58	76.71	0.00317	5	7	GSBRNA2T00121923001:promoter
chrA09	26812200	26812700	500	hypo	0	28	54	38	0	58.7	0.000107	5	16	GSBRNA2T00121916001:promoter
chrA09	27039500	27040000	500	hypo	6	26	98	38	18.75	72.06	0.00214	6	18	GSBRNA2T00121873001:exon
chrA09	27289800	27290800	1000	hypo	0	134	175	57	0	75.43	2.74e-20	11	34	GSBRNA2T00121809001:promoter,GSBRNA2T00121807001:promoter
chrA09	27546300	27546800	500	hypo	0	35	43	31	0	58.11	2.28e-05	5	9	GSBRNA2T00072553001:promoter
chrA09	27546300	27546800	500	hypo	0	35	43	31	0	58.11	2.28e-05	5	9	GSBRNA2T00072553001:promoter,GSBRNA2T00072553001:exon
chrA09	27613900	27614400	500	hypo	0	37	43	28	0	60.56	9.99e-06	5	10	GSBRNA2T00072540001:promoter,GSBRNA2T00072539001:promoter
chrA09	28012400	28012900	500	hypo	1	49	50	40	2	55.56	3.09e-06	9	14	GSBRNA2T00049442001:exon
chrA09	28014800	28015300	500	hypo	0	73	7	18	0	28	3.53e-05	10	5	GSBRNA2T00049443001:promoter,GSBRNA2T00049442001:promoter
chrA09	28143200	28143700	500	hypo	1	116	14	26	0.85	35	6.3e-08	13	7	GSBRNA2T00049482001:exon,GSBRNA2T00049482001:exon,GSBRNA2T00049482001:exon
chrA09	28284600	28285100	500	hypo	0	29	29	4	0	87.88	8.12e-06	5	6	GSBRNA2T00049523001:exon,GSBRNA2T00049523001:exon,GSBRNA2T00049523001:exon
chrA09	28296600	28297100	500	hypo	63	167	106	76	27.39	58.24	4.89e-05	15	13	GSBRNA2T00049525001:exon
chrA09	28513000	28514500	1500	hypo	0	208	201	12	0	94.37	2.59e-34	16	16	GSBRNA2T00049567001:promoter
chrA09	28513000	28514500	1500	hypo	0	208	201	12	0	94.37	2.59e-34	16	16	GSBRNA2T00049567001:promoter,GSBRNA2T00049567001:exon,GSBRNA2T00049567001:exon,GSBRNA2T00049567001:exon
chrA09	28674100	28674600	500	hypo	26	68	49	21	27.66	70	0.00115	11	10	GSBRNA2T00049613001:exon
chrA09	28702300	28702800	500	hypo	0	80	28	0	0	100	1.27e-12	12	5	GSBRNA2T00049620001:promoter
chrA09	28702300	28702800	500	hypo	0	80	28	0	0	100	1.27e-12	12	5	GSBRNA2T00049620001:promoter,GSBRNA2T00049620001:exon
chrA09	28706500	28707500	1000	hypo	3	178	80	54	1.66	59.7	2.07e-18	20	18	GSBRNA2T00049621001:exon,GSBRNA2T00049621001:exon
chrA09	29342500	29343000	500	hypo	9	27	63	17	25	78.75	0.00379	6	7	GSBRNA2T00083248001:promoter
chrA09	29387800	29388300	500	hypo	0	63	79	35	0	69.3	1.01e-09	7	8	GSBRNA2T00093026001:exon
chrA09	29446900	29447400	500	hypo	0	30	30	22	0	57.69	0.000108	5	6	GSBRNA2T00093016001:exon
chrA09	29951000	29951500	500	hypo	0	62	25	22	0	53.19	2.68e-07	10	8	GSBRNA2T00078252001:promoter
chrA09	30379300	30379800	500	hypo	0	53	29	39	0	42.65	9.33e-06	6	9	GSBRNA2T00016155001:exon
chrA09	31492900	31493400	500	hypo	13	55	208	12	19.12	94.55	5.97e-08	6	8	GSBRNA2T00035527001:promoter,GSBRNA2T00035525001:promoter
chrA09	31492900	31493400	500	hypo	13	55	208	12	19.12	94.55	5.97e-08	6	8	GSBRNA2T00035527001:promoter,GSBRNA2T00035525001:promoter,GSBRNA2T00035526001:exon
chrA09	31667100	31667600	500	hypo	0	29	78	14	0	84.78	2.9e-06	5	10	GSBRNA2T00035474001:promoter,GSBRNA2T00035475001:promoter
chrA09	31749200	31749700	500	hypo	0	34	25	23	0	52.08	9.7e-05	5	5	GSBRNA2T00035442001:exon,GSBRNA2T00035442001:exon,GSBRNA2T00035442001:exon
chrA09	31890500	31891800	1300	hypo	20	254	204	13	7.3	94.01	3.25e-32	20	19	GSBRNA2T00035409001:exon
chrA09	31983100	31983600	500	hypo	11	30	51	14	26.83	78.46	0.00462	5	8	GSBRNA2T00057373001:promoter
chrA09	32272300	32272800	500	hypo	0	82	166	49	0	77.21	8.46e-14	9	20	GSBRNA2T00057445001:promoter
chrA09	32325400	32325900	500	hypo	0	40	15	32	0	31.91	0.000756	5	7	GSBRNA2T00057459001:exon,GSBRNA2T00057459001:exon
chrA09	32409900	32410900	1000	hypo	0	85	96	5	0	95.05	2.29e-15	10	12	GSBRNA2T00122305001:promoter
chrA09	32409900	32410900	1000	hypo	0	85	96	5	0	95.05	2.29e-15	10	12	GSBRNA2T00122305001:promoter,GSBRNA2T00122304001:exon,GSBRNA2T00122304001:exon,GSBRNA2T00122304001:exon,GSBRNA2T00122304001:exon
chrA09	32428400	32428900	500	hypo	0	65	46	24	0	65.71	4.14e-09	9	10	GSBRNA2T00122299001:exon
chrA09	32509300	32509800	500	hypo	4	29	41	30	12.12	57.75	0.00305	6	6	GSBRNA2T00122280001:exon
chrA09	32591500	32592000	500	hypo	27	66	43	9	29.03	82.69	0.000404	12	6	GSBRNA2T00122258001:promoter
chrA09	32591500	32592000	500	hypo	27	66	43	9	29.03	82.69	0.000404	12	6	GSBRNA2T00122258001:promoter,GSBRNA2T00122258001:exon
chrA09	32982300	32983300	1000	hypo	0	161	96	65	0	59.63	9.95e-19	15	18	GSBRNA2T00122151001:promoter,GSBRNA2T00122154001:promoter,GSBRNA2T00122153001:promoter
chrA09	32982300	32983300	1000	hypo	0	161	96	65	0	59.63	9.95e-19	15	18	GSBRNA2T00122151001:promoter,GSBRNA2T00122154001:promoter,GSBRNA2T00122153001:promoter,GSBRNA2T00122153001:exon,GSBRNA2T00122153001:exon,GSBRNA2T00122154001:exon
chrA09	32983300	32983800	500	hypo	0	77	101	25	0	80.16	7.91e-13	11	10	GSBRNA2T00122151001:promoter,GSBRNA2T00122154001:promoter
chrA09	32983300	32983800	500	hypo	0	77	101	25	0	80.16	7.91e-13	11	10	GSBRNA2T00122151001:promoter,GSBRNA2T00122154001:promoter,GSBRNA2T00122153001:exon,GSBRNA2T00122153001:exon
chrA09	33448000	33448500	500	hypo	19	46	112	18	29.23	86.15	0.000138	9	8	GSBRNA2T00052520001:promoter
chrA09	33535400	33535900	500	hypo	0	69	46	13	0	77.97	1.45e-10	7	9	GSBRNA2T00052500001:promoter
chrA09	33556500	33557000	500	hypo	0	42	31	16	0	65.96	2.09e-06	7	5	GSBRNA2T00052493001:exon
chrA09	33726000	33726500	500	hypo	0	26	38	11	0	77.55	3.53e-05	5	8	GSBRNA2T00052443001:exon,GSBRNA2T00052443001:exon
chrA09	33784200	33784700	500	hypo	22	30	137	20	42.31	87.26	0.00884	6	8	GSBRNA2T00052421001:intron
chrA09_random	174900	175400	500	hypo	0	103	55	159	0	25.7	6.65e-07	7	14	GSBRNA2T00004061001:promoter
chrA09_random	247600	248100	500	hypo	0	30	60	54	0	52.63	0.000129	5	16	GSBRNA2T00004075001:exon
chrA09_random	479900	480400	500	hypo	0	32	70	26	0	72.92	4.91e-06	5	9	GSBRNA2T00014592001:promoter
chrA09_random	509300	509800	500	hypo	15	25	91	9	37.5	91	0.00718	5	13	GSBRNA2T00020566001:promoter
chrA09_random	760800	761300	500	hypo	0	43	28	8	0	77.78	4.47e-07	6	6	GSBRNA2T00058802001:promoter
chrA09_random	760800	761300	500	hypo	0	43	28	8	0	77.78	4.47e-07	6	6	GSBRNA2T00058802001:promoter,GSBRNA2T00058802001:exon,GSBRNA2T00058802001:exon
chrA09_random	869200	869700	500	hypo	0	46	68	14	0	82.93	1.6e-08	5	13	GSBRNA2T00011665001:exon
chrA09_random	1180700	1181200	500	hypo	0	36	28	6	0	82.35	1.83e-06	5	6	GSBRNA2T00004803001:promoter
chrA09_random	1588000	1588500	500	hypo	0	47	12	38	0	24	0.00139	8	8	GSBRNA2T00013915001:exon,GSBRNA2T00013915001:exon
chrA09_random	2393300	2393800	500	hypo	0	69	94	49	0	65.73	3.28e-10	7	12	GSBRNA2T00097481001:promoter
chrA09_random	2524800	2525300	500	hypo	15	37	46	3	28.85	93.88	0.000758	9	7	GSBRNA2T00058775001:promoter
chrA09_random	3023300	3023800	500	hypo	0	29	219	58	0	79.06	2.77e-06	5	14	GSBRNA2T00020360001:promoter
chrA09_random	3585400	3585900	500	hypo	0	54	16	22	0	42.11	1.47e-05	8	6	GSBRNA2T00027529001:exon,GSBRNA2T00027529001:exon,GSBRNA2T00027529001:exon
chrA09_random	3600700	3601700	1000	hypo	14	86	92	2	14	97.87	6.17e-11	14	13	GSBRNA2T00003957001:exon,GSBRNA2T00003957001:exon,GSBRNA2T00003957001:exon
chrA09_random	3734500	3735500	1000	hypo	0	63	89	9	0	90.82	8.89e-12	11	12	GSBRNA2T00008007001:exon,GSBRNA2T00008007001:exon
chrA09_random	3981500	3982000	500	hypo	31	61	79	42	33.7	65.29	0.00847	12	13	GSBRNA2T00010899001:promoter
chrA09_random	3981500	3982000	500	hypo	31	61	79	42	33.7	65.29	0.00847	12	13	GSBRNA2T00010899001:promoter,GSBRNA2T00010899001:exon
chrA10	294000	294500	500	hypo	0	55	28	18	0	60.87	2.53e-07	6	6	GSBRNA2T00150525001:promoter
chrA10	294000	294500	500	hypo	0	55	28	18	0	60.87	2.53e-07	6	6	GSBRNA2T00150525001:promoter,GSBRNA2T00150525001:exon
chrA10	320800	321300	500	hypo	16	58	30	0	21.62	100	2.76e-05	10	5	GSBRNA2T00150515001:promoter
chrA10	443600	444100	500	hypo	39	50	48	1	43.82	97.96	0.00372	14	6	GSBRNA2T00150493001:promoter
chrA10	443600	444100	500	hypo	39	50	48	1	43.82	97.96	0.00372	14	6	GSBRNA2T00150493001:promoter,GSBRNA2T00150493001:exon
chrA10	504600	505600	1000	hypo	106	83	112	14	56.08	88.89	0.00939	11	11	GSBRNA2T00150480001:exon
chrA10	574600	575100	500	hypo	0	51	22	39	0	36.07	5.78e-05	5	7	GSBRNA2T00150465001:exon,GSBRNA2T00150465001:exon
chrA10	842700	843200	500	hypo	17	67	61	18	20.24	77.22	1.2e-05	11	7	GSBRNA2T00150396001:exon
chrA10	1357100	1357600	500	hypo	0	32	25	9	0	73.53	1.53e-05	6	5	GSBRNA2T00150282001:exon
chrA10	1551300	1551800	500	hypo	9	38	33	10	19.15	76.74	0.000855	6	6	GSBRNA2T00150225001:exon
chrA10	1972400	1972900	500	hypo	8	29	74	11	21.62	87.06	0.000512	6	7	GSBRNA2T00087084001:promoter
chrA10	2149100	2150100	1000	hypo	54	112	158	29	32.53	84.49	3.63e-07	18	25	GSBRNA2T00087986001:promoter
chrA10	2235400	2235900	500	hypo	0	39	22	26	0	45.83	8.9e-05	6	7	GSBRNA2T00122806001:promoter
chrA10	3437300	3437800	500	hypo	15	47	66	11	24.19	85.71	9.14e-05	9	12	GSBRNA2T00064675001:promoter,GSBRNA2T00064676001:promoter
chrA10	3437300	3437800	500	hypo	15	47	66	11	24.19	85.71	9.14e-05	9	12	GSBRNA2T00064675001:promoter,GSBRNA2T00064676001:promoter,GSBRNA2T00064676001:exon
chrA10	3448200	3448700	500	hypo	4	184	53	89	2.13	37.32	3.28e-12	18	15	GSBRNA2T00064674001:exon
chrA10	4503400	4503900	500	hypo	32	50	61	2	39.02	96.83	0.000848	7	5	GSBRNA2T00120900001:exon
chrA10	4508700	4509200	500	hypo	6	48	135	10	11.11	93.1	4.97e-08	5	11	GSBRNA2T00120900001:intron
chrA10	4920200	4920700	500	hypo	24	72	52	0	25	100	2.25e-06	15	7	GSBRNA2T00093045001:exon
chrA10	4936500	4937000	500	hypo	0	71	122	28	0	81.33	2.06e-12	6	10	GSBRNA2T00093048001:promoter
chrA10	5083200	5083700	500	hypo	16	49	108	38	24.62	73.97	0.00022	5	6	GSBRNA2T00079040001:promoter,GSBRNA2T00079039001:promoter
chrA10	5083200	5083700	500	hypo	16	49	108	38	24.62	73.97	0.00022	5	6	GSBRNA2T00079040001:promoter,GSBRNA2T00079039001:promoter,GSBRNA2T00079039001:exon,GSBRNA2T00079039001:exon
chrA10	5085700	5086800	1100	hypo	0	59	144	26	0	84.71	3.17e-11	10	22	GSBRNA2T00079039001:exon,GSBRNA2T00079039001:exon
chrA10	5174700	5175200	500	hypo	10	103	46	3	8.85	93.88	1.46e-11	13	5	GSBRNA2T00079026001:promoter,GSBRNA2T00079027001:promoter
chrA10	6400100	6402100	2000	hypo	191	373	586	58	33.87	90.99	4.08e-23	46	49	GSBRNA2T00110195001:promoter
chrA10	6400100	6402100	2000	hypo	191	373	586	58	33.87	90.99	4.08e-23	46	49	GSBRNA2T00110195001:promoter,GSBRNA2T00110195001:exon,GSBRNA2T00110195001:exon,GSBRNA2T00110195001:exon,GSBRNA2T00110195001:exon,GSBRNA2T00110195001:exon
chrA10	6488500	6489500	1000	hypo	35	142	150	34	19.77	81.52	8.3e-12	20	14	GSBRNA2T00110183001:promoter
chrA10	6488500	6489500	1000	hypo	35	142	150	34	19.77	81.52	8.3e-12	20	14	GSBRNA2T00110183001:promoter,GSBRNA2T00110183001:exon
chrA10	7075600	7076100	500	hypo	14	73	83	61	16.09	57.64	3.2e-05	11	19	GSBRNA2T00074873001:exon
chrA10	7564000	7564500	500	hypo	18	57	71	24	24	74.74	0.000141	6	12	GSBRNA2T00084989001:intron
chrA10	7667700	7668200	500	hypo	88	128	178	11	40.74	94.18	2.54e-07	10	10	GSBRNA2T00084975001:promoter
chrA10	8567400	8567900	500	hypo	16	36	94	8	30.77	92.16	0.00043	8	9	GSBRNA2T00095454001:promoter
chrA10	8567400	8567900	500	hypo	16	36	94	8	30.77	92.16	0.00043	8	9	GSBRNA2T00095454001:promoter,GSBRNA2T00095455001:exon
chrA10	8696800	8697300	500	hypo	0	88	73	0	0	100	1.28e-15	12	13	GSBRNA2T00095488001:exon,GSBRNA2T00095488001:exon
chrA10	9368200	9370600	2400	hypo	1	466	338	25	0.21	93.11	2.82e-70	35	30	GSBRNA2T00065617001:promoter
chrA10	9598900	9599400	500	hypo	15	30	170	37	33.33	82.13	0.00344	7	11	GSBRNA2T00065658001:promoter
chrA10	9600800	9601800	1000	hypo	78	84	214	6	48.15	97.27	2.48e-05	20	27	GSBRNA2T00065659001:promoter
chrA10	9600800	9601800	1000	hypo	78	84	214	6	48.15	97.27	2.48e-05	20	27	GSBRNA2T00065659001:promoter,GSBRNA2T00065659001:exon,GSBRNA2T00065659001:exon
chrA10	9601800	9604000	2200	hypo	1	302	407	37	0.33	91.67	5.01e-50	28	37	GSBRNA2T00065659001:exon,GSBRNA2T00065659001:exon,GSBRNA2T00065659001:exon,GSBRNA2T00065659001:exon,GSBRNA2T00065659001:exon
chrA10	9665900	9666400	500	hypo	0	25	23	15	0	60.53	0.000334	5	6	GSBRNA2T00093713001:exon,GSBRNA2T00093713001:exon
chrA10	9778700	9779200	500	hypo	0	30	77	4	0	95.06	6.49e-07	5	12	GSBRNA2T00003081001:promoter
chrA10	9778700	9779200	500	hypo	0	30	77	4	0	95.06	6.49e-07	5	12	GSBRNA2T00003081001:promoter,GSBRNA2T00003081001:exon,GSBRNA2T00003081001:exon,GSBRNA2T00003081001:exon
chrA10	10563800	10564300	500	hypo	0	26	42	21	0	66.67	9.13e-05	5	8	GSBRNA2T00047892001:exon,GSBRNA2T00047892001:exon
chrA10	10636000	10638000	2000	hypo	17	106	112	24	13.82	82.35	3.36e-11	18	17	GSBRNA2T00047877001:promoter
chrA10	10636000	10638000	2000	hypo	17	106	112	24	13.82	82.35	3.36e-11	18	17	GSBRNA2T00047877001:promoter,GSBRNA2T00047877001:exon,GSBRNA2T00047877001:exon,GSBRNA2T00047877001:exon,GSBRNA2T00047877001:exon,GSBRNA2T00047877001:exon
chrA10	10762000	10763000	1000	hypo	124	135	221	21	47.88	91.32	6.07e-06	17	17	GSBRNA2T00047848001:promoter,GSBRNA2T00047850001:promoter
chrA10	10762000	10763000	1000	hypo	124	135	221	21	47.88	91.32	6.07e-06	17	17	GSBRNA2T00047848001:promoter,GSBRNA2T00047850001:promoter,GSBRNA2T00047850001:exon,GSBRNA2T00047850001:exon,GSBRNA2T00047850001:exon
chrA10	10763100	10764100	1000	hypo	61	239	203	11	20.33	94.86	9.86e-21	16	12	GSBRNA2T00047848001:promoter
chrA10	10953700	10954200	500	hypo	51	118	411	15	30.18	96.48	5.29e-12	9	9	GSBRNA2T00096431001:promoter
chrA10	10991900	10992400	500	hypo	13	53	69	10	19.7	87.34	6.58e-06	10	5	GSBRNA2T00096441001:promoter
chrA10	11232800	11233300	500	hypo	0	33	30	5	0	85.71	2.8e-06	5	5	GSBRNA2T00154116001:promoter
chrA10	11397300	11397800	500	hypo	0	73	180	12	0	93.75	1.34e-14	9	19	GSBRNA2T00154153001:promoter
chrA10	12615200	12615700	500	hypo	1	65	84	4	1.52	95.45	6.53e-12	10	10	GSBRNA2T00065936001:promoter,GSBRNA2T00065934001:promoter
chrA10	12615200	12615700	500	hypo	1	65	84	4	1.52	95.45	6.53e-12	10	10	GSBRNA2T00065936001:promoter,GSBRNA2T00065934001:promoter,GSBRNA2T00065935001:exon,GSBRNA2T00065935001:exon
chrA10	12731300	12731800	500	hypo	20	66	37	28	23.26	56.92	0.0049	9	8	GSBRNA2T00065903001:promoter
chrA10	12772000	12772500	500	hypo	0	105	20	26	0	43.48	1.94e-09	12	7	GSBRNA2T00065893001:promoter
chrA10	13028800	13029300	500	hypo	0	42	28	35	0	44.44	5.21e-05	7	7	GSBRNA2T00135393001:exon,GSBRNA2T00135393001:exon
chrA10	13239900	13240900	1000	hypo	0	107	45	23	0	66.18	2.5e-13	13	10	GSBRNA2T00135452001:promoter
chrA10	13239900	13240900	1000	hypo	0	107	45	23	0	66.18	2.5e-13	13	10	GSBRNA2T00135452001:promoter,GSBRNA2T00135453001:exon,GSBRNA2T00135453001:exon,GSBRNA2T00135453001:exon,GSBRNA2T00135453001:exon
chrA10	13429300	13429800	500	hypo	0	81	39	36	0	52	3.97e-09	5	10	GSBRNA2T00135510001:exon
chrA10	13842400	13842900	500	hypo	0	52	62	7	0	89.86	1.05e-09	5	5	GSBRNA2T00135616001:exon
chrA10	14252600	14253600	1000	hypo	38	100	270	14	27.54	95.07	2.12e-10	21	31	GSBRNA2T00135709001:promoter
chrA10	14252600	14253600	1000	hypo	38	100	270	14	27.54	95.07	2.12e-10	21	31	GSBRNA2T00135709001:promoter,GSBRNA2T00135709001:exon
chrA10	14592300	14592800	500	hypo	63	56	175	9	52.94	95.11	0.00176	21	17	GSBRNA2T00135799001:promoter
chrA10	14599000	14599500	500	hypo	0	135	110	5	0	95.65	1.87e-22	15	11	GSBRNA2T00135801001:exon
chrA10	14681000	14681500	500	hypo	0	51	30	17	0	63.83	3.5e-07	6	6	GSBRNA2T00135824001:promoter
chrA10	14681000	14681500	500	hypo	0	51	30	17	0	63.83	3.5e-07	6	6	GSBRNA2T00135824001:promoter,GSBRNA2T00135825001:exon,GSBRNA2T00135825001:exon
chrA10	14698200	14698700	500	hypo	0	126	75	72	0	51.02	1.75e-13	13	7	GSBRNA2T00135830001:promoter,GSBRNA2T00135829001:promoter
chrA10	14698200	14698700	500	hypo	0	126	75	72	0	51.02	1.75e-13	13	7	GSBRNA2T00135830001:promoter,GSBRNA2T00135829001:promoter,GSBRNA2T00135830001:exon
chrA10	14945000	14945500	500	hypo	0	130	43	14	0	75.44	1.12e-16	10	6	GSBRNA2T00135906001:promoter,GSBRNA2T00135905001:promoter
chrA10	15038900	15039400	500	hypo	0	45	153	31	0	83.15	5.29e-09	5	16	GSBRNA2T00135931001:exon
chrA10	15137000	15137500	500	hypo	32	116	54	6	21.62	90	5.5e-08	7	7	GSBRNA2T00135963001:promoter
chrA10	15326500	15327500	1000	hypo	116	140	284	35	45.31	89.03	9.22e-07	17	16	GSBRNA2T00136032001:promoter,GSBRNA2T00136033001:promoter,GSBRNA2T00136034001:promoter
chrA10	15326500	15327500	1000	hypo	116	140	284	35	45.31	89.03	9.22e-07	17	16	GSBRNA2T00136032001:promoter,GSBRNA2T00136033001:promoter,GSBRNA2T00136034001:promoter,GSBRNA2T00136033001:exon
chrA10	16277800	16278300	500	hypo	166	96	261	21	63.36	92.55	0.00382	16	16	GSBRNA2T00136292001:promoter
chrA10	16298200	16298700	500	hypo	2	41	38	12	4.65	76	4.04e-06	7	6	GSBRNA2T00136297001:promoter
chrA10	16298200	16298700	500	hypo	2	41	38	12	4.65	76	4.04e-06	7	6	GSBRNA2T00136297001:promoter,GSBRNA2T00136298001:exon,GSBRNA2T00136298001:exon
chrA10	16816300	16816800	500	hypo	64	102	384	78	38.55	83.12	1.66e-06	14	15	GSBRNA2T00136436001:promoter,GSBRNA2T00136435001:promoter
chrA10	16863400	16863900	500	hypo	0	58	45	40	0	52.94	2.78e-07	11	12	GSBRNA2T00136447001:promoter
chrA10	16863400	16863900	500	hypo	0	58	45	40	0	52.94	2.78e-07	11	12	GSBRNA2T00136447001:promoter,GSBRNA2T00136447001:exon
chrA10	17324100	17324600	500	hypo	4	57	40	31	6.56	56.34	9.94e-06	10	11	GSBRNA2T00069493001:promoter
chrA10	17324100	17324600	500	hypo	4	57	40	31	6.56	56.34	9.94e-06	10	11	GSBRNA2T00069493001:promoter,GSBRNA2T00069493001:exon
chrA10_random	428700	429200	500	hypo	3	56	26	5	5.08	83.87	2.27e-07	9	5	GSBRNA2T00088563001:exon
chrA10_random	795500	796000	500	hypo	59	95	131	37	38.31	77.98	0.000199	9	9	GSBRNA2T00008481001:intron
chrA10_random	1298100	1298600	500	hypo	0	30	38	7	0	84.44	5.39e-06	4	6	GSBRNA2T00056820001:promoter
chrA10_random	1298100	1298600	500	hypo	0	30	38	7	0	84.44	5.39e-06	4	6	GSBRNA2T00056820001:promoter,GSBRNA2T00056821001:exon
chrA10_random	1462300	1463300	1000	hypo	0	163	107	52	0	67.3	9.07e-21	14	15	GSBRNA2T00096771001:promoter,GSBRNA2T00096770001:promoter
chrA10_random	1533900	1534400	500	hypo	0	37	79	3	0	96.34	3.88e-08	6	7	GSBRNA2T00066823001:exon
chrA10_random	1544000	1544500	500	hypo	0	106	19	28	0	40.43	4.71e-09	13	8	GSBRNA2T00004598001:exon
chrA10_random	1545600	1546100	500	hypo	25	102	55	46	19.69	54.46	0.000167	14	13	GSBRNA2T00004598001:promoter
chrA10_random	1545600	1546100	500	hypo	25	102	55	46	19.69	54.46	0.000167	14	13	GSBRNA2T00004598001:promoter,GSBRNA2T00004598001:exon
chrAnn_random	521700	522200	500	hypo	0	58	128	51	0	71.51	1.04e-09	6	9	GSBRNA2T00119598001:promoter
chrAnn_random	1051600	1052100	500	hypo	0	110	23	20	0	53.49	3.13e-11	8	7	GSBRNA2T00119748001:promoter
chrAnn_random	1480300	1480800	500	hypo	4	36	216	40	10	84.38	2.55e-06	6	22	GSBRNA2T00060931001:promoter
chrAnn_random	1480300	1480800	500	hypo	4	36	216	40	10	84.38	2.55e-06	6	22	GSBRNA2T00060931001:promoter,GSBRNA2T00060931001:exon
chrAnn_random	1489100	1489600	500	hypo	4	49	44	8	7.55	84.62	5.65e-07	8	7	GSBRNA2T00060932001:promoter
chrAnn_random	1489100	1489600	500	hypo	4	49	44	8	7.55	84.62	5.65e-07	8	7	GSBRNA2T00060932001:promoter,GSBRNA2T00060932001:exon
chrAnn_random	3555300	3555800	500	hypo	0	51	43	22	0	66.15	1.32e-07	6	5	GSBRNA2T00043561001:promoter
chrAnn_random	3750800	3751300	500	hypo	1	38	32	0	2.56	100	4.12e-07	6	5	GSBRNA2T00045869001:exon
chrAnn_random	3751800	3752300	500	hypo	23	49	36	12	31.94	75	0.00808	10	7	GSBRNA2T00045869001:exon
chrAnn_random	3767600	3768100	500	hypo	27	54	94	20	33.33	82.46	0.000461	11	9	GSBRNA2T00045871001:promoter
chrAnn_random	4167000	4167500	500	hypo	0	110	15	42	0	26.32	5.81e-07	10	8	GSBRNA2T00045937001:promoter
chrAnn_random	4873700	4874200	500	hypo	9	142	37	58	5.96	38.95	1.69e-07	10	9	GSBRNA2T00060096001:promoter
chrAnn_random	5717500	5718500	1000	hypo	0	154	241	68	0	77.99	4.09e-24	16	23	GSBRNA2T00064810001:promoter
chrAnn_random	5717500	5718500	1000	hypo	0	154	241	68	0	77.99	4.09e-24	16	23	GSBRNA2T00064810001:promoter,GSBRNA2T00064812001:exon,GSBRNA2T00064812001:exon
chrAnn_random	5858600	5860100	1500	hypo	53	92	59	11	36.55	84.29	0.000411	21	11	GSBRNA2T00067874001:exon,GSBRNA2T00067874001:exon,GSBRNA2T00067874001:exon,GSBRNA2T00067874001:exon,GSBRNA2T00067874001:exon,GSBRNA2T00067874001:exon,GSBRNA2T00067874001:exon,GSBRNA2T00067874001:exon
chrAnn_random	5985900	5986400	500	hypo	0	26	36	3	0	92.31	1.06e-05	5	6	GSBRNA2T00067901001:promoter
chrAnn_random	6309000	6309500	500	hypo	0	57	47	39	0	54.65	2.3e-07	6	13	GSBRNA2T00071689001:promoter
chrAnn_random	6309000	6309500	500	hypo	0	57	47	39	0	54.65	2.3e-07	6	13	GSBRNA2T00071689001:promoter,GSBRNA2T00071689001:exon
chrAnn_random	6626800	6627300	500	hypo	0	45	52	86	0	37.68	6.98e-05	7	6	GSBRNA2T00072173001:promoter
chrAnn_random	6865600	6866100	500	hypo	0	56	42	58	0	42	4.54e-06	6	9	GSBRNA2T00075569001:exon
chrAnn_random	7091800	7092300	500	hypo	0	32	38	1	0	97.44	8.49e-07	5	5	GSBRNA2T00076677001:exon,GSBRNA2T00076677001:exon
chrAnn_random	7371700	7372900	1200	hypo	3	133	88	38	2.21	69.84	2.91e-16	15	13	GSBRNA2T00077243001:promoter
chrAnn_random	7371700	7372900	1200	hypo	3	133	88	38	2.21	69.84	2.91e-16	15	13	GSBRNA2T00077243001:promoter,GSBRNA2T00077243001:exon,GSBRNA2T00077243001:exon,GSBRNA2T00077243001:exon
chrAnn_random	8831700	8832700	1000	hypo	0	169	51	48	0	51.52	1.34e-16	23	15	GSBRNA2T00086416001:exon,GSBRNA2T00086416001:exon,GSBRNA2T00086416001:exon
chrAnn_random	8832900	8833400	500	hypo	9	35	35	3	20.45	92.11	0.000319	5	6	GSBRNA2T00086416001:exon
chrAnn_random	8940700	8941200	500	hypo	44	121	57	15	26.67	79.17	6.37e-06	15	5	GSBRNA2T00086655001:promoter
chrAnn_random	9295500	9296500	1000	hypo	34	54	300	71	38.64	80.86	0.000529	12	27	GSBRNA2T00087151001:promoter,GSBRNA2T00087150001:promoter
chrAnn_random	9357000	9357500	500	hypo	46	60	83	3	43.4	96.51	0.000583	16	9	GSBRNA2T00087157001:promoter
chrAnn_random	9357000	9357500	500	hypo	46	60	83	3	43.4	96.51	0.000583	16	9	GSBRNA2T00087157001:promoter,GSBRNA2T00087157001:exon
chrAnn_random	9582700	9583200	500	hypo	8	26	123	9	23.53	93.18	0.000415	5	19	GSBRNA2T00087566001:exon
chrAnn_random	10517300	10517800	500	hypo	0	57	32	11	0	74.42	1.46e-08	6	5	GSBRNA2T00089502001:exon
chrAnn_random	10764500	10765000	500	hypo	3	72	105	76	4	58.01	1.77e-08	7	18	GSBRNA2T00092207001:promoter
chrAnn_random	12078400	12078900	500	hypo	4	30	76	4	11.76	95	1.8e-05	5	10	GSBRNA2T00003985001:promoter
chrAnn_random	12078400	12078900	500	hypo	4	30	76	4	11.76	95	1.8e-05	5	10	GSBRNA2T00003985001:promoter,GSBRNA2T00003985001:exon
chrAnn_random	12124900	12125400	500	hypo	4	27	70	14	12.9	83.33	0.000197	5	11	GSBRNA2T00004512001:promoter
chrAnn_random	12196600	12197100	500	hypo	34	53	37	2	39.08	94.87	0.0034	10	5	GSBRNA2T00005030001:promoter,GSBRNA2T00005031001:promoter
chrAnn_random	12196600	12197100	500	hypo	34	53	37	2	39.08	94.87	0.0034	10	5	GSBRNA2T00005030001:promoter,GSBRNA2T00005031001:promoter,GSBRNA2T00005030001:exon,GSBRNA2T00005030001:exon
chrAnn_random	12721800	12722300	500	hypo	7	91	37	11	7.14	77.08	2.11e-09	7	7	GSBRNA2T00007974001:exon
chrAnn_random	12900400	12900900	500	hypo	0	36	23	43	0	34.85	0.000734	5	8	GSBRNA2T00008291001:promoter,GSBRNA2T00008290001:promoter
chrAnn_random	12900400	12900900	500	hypo	0	36	23	43	0	34.85	0.000734	5	8	GSBRNA2T00008291001:promoter,GSBRNA2T00008290001:promoter,GSBRNA2T00008290001:exon
chrAnn_random	12906300	12907300	1000	hypo	115	107	302	25	51.8	92.35	3.27e-05	18	19	GSBRNA2T00008292001:promoter
chrAnn_random	13177500	13178500	1000	hypo	121	124	229	30	49.39	88.42	4.55e-05	19	20	GSBRNA2T00008746001:promoter
chrAnn_random	13357100	13357600	500	hypo	6	40	42	7	13.04	85.71	2.48e-05	5	8	GSBRNA2T00010454001:promoter
chrAnn_random	13859700	13860200	500	hypo	27	41	73	1	39.71	98.65	0.00105	8	6	GSBRNA2T00012081001:exon,GSBRNA2T00012081001:exon
chrAnn_random	14198900	14199400	500	hypo	0	33	71	20	0	78.02	1.85e-06	5	9	GSBRNA2T00014123001:promoter
chrAnn_random	14212000	14212500	500	hypo	2	74	28	22	2.63	56	1.28e-07	11	7	GSBRNA2T00014126001:exon
chrAnn_random	14663000	14663500	500	hypo	0	154	43	29	0	59.72	1.24e-16	8	5	GSBRNA2T00016479001:exon
chrAnn_random	15349800	15350300	500	hypo	0	60	74	17	0	81.32	2.42e-10	9	7	GSBRNA2T00019475001:promoter
chrAnn_random	15778300	15778800	500	hypo	0	40	145	14	0	91.19	9.31e-09	6	14	GSBRNA2T00022401001:promoter
chrAnn_random	15864500	15865000	500	hypo	6	87	18	39	6.45	31.58	0.000678	9	6	GSBRNA2T00022454001:exon,GSBRNA2T00022454001:exon
chrAnn_random	16139300	16139800	500	hypo	14	27	52	6	34.15	89.66	0.007	5	6	GSBRNA2T00023331001:exon,GSBRNA2T00023331001:exon
chrAnn_random	16145600	16146100	500	hypo	0	39	109	29	0	78.99	1.34e-07	6	9	GSBRNA2T00023332001:promoter
chrAnn_random	16332300	16332800	500	hypo	12	37	308	21	24.49	93.62	1.75e-05	6	10	GSBRNA2T00024834001:promoter,GSBRNA2T00024833001:promoter
chrAnn_random	16524500	16525000	500	hypo	0	76	30	29	0	50.85	2.2e-08	7	10	GSBRNA2T00025171001:promoter
chrAnn_random	16595700	16596200	500	hypo	7	68	95	17	9.33	84.82	2.09e-09	8	9	GSBRNA2T00025251001:promoter
chrAnn_random	16595700	16596200	500	hypo	7	68	95	17	9.33	84.82	2.09e-09	8	9	GSBRNA2T00025251001:promoter,GSBRNA2T00025251001:exon
chrAnn_random	16765200	16766200	1000	hypo	19	191	352	258	9.05	57.7	9.64e-17	25	26	GSBRNA2T00025507001:promoter
chrAnn_random	16765200	16766200	1000	hypo	19	191	352	258	9.05	57.7	9.64e-17	25	26	GSBRNA2T00025507001:promoter,GSBRNA2T00025507001:exon,GSBRNA2T00025507001:exon
chrAnn_random	17319300	17320300	1000	hypo	0	125	303	20	0	93.81	7.43e-24	15	18	GSBRNA2T00027800001:intron
chrAnn_random	17320300	17320800	500	hypo	67	110	93	8	37.85	92.08	9.81e-06	14	13	GSBRNA2T00027800001:intron
chrAnn_random	18834000	18835000	1000	hypo	50	60	117	10	45.45	92.13	0.000856	11	14	GSBRNA2T00034511001:exon,GSBRNA2T00034511001:exon
chrAnn_random	20118900	20119400	500	hypo	10	42	55	19	19.23	74.32	0.000295	6	6	GSBRNA2T00039338001:promoter
chrAnn_random	20119500	20120000	500	hypo	0	26	87	5	0	94.57	2.79e-06	5	11	GSBRNA2T00039338001:promoter
chrAnn_random	20650200	20651200	1000	hypo	11	257	218	103	4.1	67.91	2.94e-28	24	23	GSBRNA2T00040899001:exon
chrAnn_random	20748100	20748600	500	hypo	11	39	78	6	22	92.86	4.25e-05	9	8	GSBRNA2T00041144001:promoter
chrAnn_random	21895800	21896300	500	hypo	0	52	27	18	0	60	5.95e-07	5	8	GSBRNA2T00044153001:promoter,GSBRNA2T00044152001:promoter,GSBRNA2T00044151001:promoter
chrAnn_random	21895800	21896300	500	hypo	0	52	27	18	0	60	5.95e-07	5	8	GSBRNA2T00044153001:promoter,GSBRNA2T00044152001:promoter,GSBRNA2T00044151001:promoter,GSBRNA2T00044151001:exon
chrAnn_random	22044600	22046000	1400	hypo	148	125	1212	89	54.21	93.16	6.4e-07	21	29	GSBRNA2T00044218001:promoter
chrAnn_random	22044600	22046000	1400	hypo	148	125	1212	89	54.21	93.16	6.4e-07	21	29	GSBRNA2T00044218001:promoter,GSBRNA2T00044218001:exon
chrAnn_random	22397200	22397700	500	hypo	16	69	85	86	18.82	49.71	0.00104	9	9	GSBRNA2T00045735001:exon,GSBRNA2T00045735001:exon,GSBRNA2T00045735001:exon,GSBRNA2T00045735001:exon
chrAnn_random	22604700	22605200	500	hypo	0	137	34	47	0	41.98	7.78e-12	9	8	GSBRNA2T00046647001:promoter
chrAnn_random	25379000	25379500	500	hypo	9	92	20	34	8.91	37.04	0.000582	14	10	GSBRNA2T00054668001:promoter
chrAnn_random	25379000	25379500	500	hypo	9	92	20	34	8.91	37.04	0.000582	14	10	GSBRNA2T00054668001:promoter,GSBRNA2T00054668001:exon
chrAnn_random	25504700	25505200	500	hypo	0	33	42	43	0	49.41	0.00012	5	10	GSBRNA2T00055533001:promoter,GSBRNA2T00055534001:promoter
chrAnn_random	28249000	28249500	500	hypo	23	41	129	7	35.94	94.85	0.000279	8	8	GSBRNA2T00064332001:promoter
chrAnn_random	28515200	28516200	1000	hypo	13	93	179	22	12.26	89.05	1.45e-12	11	18	GSBRNA2T00064453001:exon,GSBRNA2T00064453001:exon
chrAnn_random	28747400	28747900	500	hypo	8	54	53	46	12.9	53.54	0.000278	6	6	GSBRNA2T00065237001:promoter
chrAnn_random	29730800	29731300	500	hypo	9	177	180	24	4.84	88.24	1.19e-24	13	14	GSBRNA2T00068323001:promoter
chrAnn_random	29889700	29890200	500	hypo	0	55	85	7	0	92.39	1.07e-10	11	14	GSBRNA2T00068420001:promoter
chrAnn_random	29889700	29890200	500	hypo	0	55	85	7	0	92.39	1.07e-10	11	14	GSBRNA2T00068420001:promoter,GSBRNA2T00068420001:exon
chrAnn_random	30110000	30110500	500	hypo	0	38	52	22	0	70.27	1.65e-06	7	7	GSBRNA2T00069250001:exon
chrAnn_random	30110800	30111300	500	hypo	0	84	60	64	0	48.39	2.84e-09	9	19	GSBRNA2T00069250001:exon
chrAnn_random	30379000	30380000	1000	hypo	40	79	119	13	33.61	90.15	6.61e-06	16	14	GSBRNA2T00072012001:promoter
chrAnn_random	30389200	30389700	500	hypo	47	94	69	3	33.33	95.83	6.89e-06	12	10	GSBRNA2T00072020001:exon
chrAnn_random	30553000	30554000	1000	hypo	1	192	322	23	0.52	93.33	1.15e-33	20	25	GSBRNA2T00072109001:exon,GSBRNA2T00072109001:exon
chrAnn_random	30827500	30828500	1000	hypo	66	115	244	37	36.46	86.83	1.76e-07	20	19	GSBRNA2T00072837001:promoter
chrAnn_random	30827500	30828500	1000	hypo	66	115	244	37	36.46	86.83	1.76e-07	20	19	GSBRNA2T00072837001:promoter,GSBRNA2T00072837001:exon,GSBRNA2T00072836001:exon
chrAnn_random	31873400	31873900	500	hypo	0	119	50	13	0	79.37	2.55e-16	7	8	GSBRNA2T00076516001:promoter,GSBRNA2T00076518001:promoter
chrAnn_random	32022500	32023500	1000	hypo	153	146	230	34	51.17	87.12	6.96e-05	31	29	GSBRNA2T00077050001:promoter
chrAnn_random	33228500	33229500	1000	hypo	295	136	259	21	68.45	92.5	0.00854	22	16	GSBRNA2T00081979001:promoter,GSBRNA2T00081980001:promoter
chrAnn_random	33228500	33229500	1000	hypo	295	136	259	21	68.45	92.5	0.00854	22	16	GSBRNA2T00081979001:promoter,GSBRNA2T00081980001:promoter,GSBRNA2T00081980001:exon
chrAnn_random	33364500	33365000	500	hypo	6	20	60	8	23.08	88.24	0.00384	5	9	GSBRNA2T00082577001:promoter
chrAnn_random	33810600	33811100	500	hypo	35	86	75	35	28.93	68.18	0.000367	8	8	GSBRNA2T00083873001:promoter
chrAnn_random	34429800	34430800	1000	hypo	44	173	322	20	20.28	94.15	8.34e-19	27	23	GSBRNA2T00087032001:promoter,GSBRNA2T00087033001:promoter
chrAnn_random	35686500	35687000	500	hypo	0	35	109	8	0	93.16	7.29e-08	6	7	GSBRNA2T00091493001:exon
chrAnn_random	36229400	36229900	500	hypo	19	43	82	21	30.65	79.61	0.00125	7	7	GSBRNA2T00092816001:promoter
chrAnn_random	40985900	40986400	500	hypo	0	42	31	16	0	65.96	2.09e-06	5	6	GSBRNA2T00011200001:promoter
chrAnn_random	41553800	41554300	500	hypo	3	43	88	9	6.52	90.72	1.21e-07	7	10	GSBRNA2T00013472001:promoter
chrAnn_random	41847400	41848400	1000	hypo	23	108	92	14	17.56	86.79	3.93e-10	14	12	GSBRNA2T00014016001:promoter
chrAnn_random	41847400	41848400	1000	hypo	23	108	92	14	17.56	86.79	3.93e-10	14	12	GSBRNA2T00014016001:promoter,GSBRNA2T00014016001:exon,GSBRNA2T00014016001:exon
chrAnn_random	42373700	42374200	500	hypo	0	41	38	25	0	60.32	4.45e-06	6	12	GSBRNA2T00014748001:exon
chrAnn_random	43547500	43548000	500	hypo	0	49	25	16	0	60.98	1.12e-06	8	7	GSBRNA2T00018095001:promoter
chrAnn_random	44403800	44404300	500	hypo	30	76	32	18	28.3	64	0.00715	11	7	GSBRNA2T00020838001:promoter
chrAnn_random	44621000	44621500	500	hypo	0	32	67	9	0	88.16	8.27e-07	6	10	GSBRNA2T00022365001:promoter
chrAnn_random	44621000	44621500	500	hypo	0	32	67	9	0	88.16	8.27e-07	6	10	GSBRNA2T00022365001:promoter,GSBRNA2T00022365001:exon
chrAnn_random	44917800	44918300	500	hypo	9	47	51	6	16.07	89.47	7.93e-06	8	10	GSBRNA2T00022839001:promoter
chrAnn_random	44917800	44918300	500	hypo	9	47	51	6	16.07	89.47	7.93e-06	8	10	GSBRNA2T00022839001:promoter,GSBRNA2T00022839001:exon,GSBRNA2T00022839001:exon
chrAnn_random	45370700	45371200	500	hypo	2	64	58	8	3.03	87.88	3.68e-10	6	5	GSBRNA2T00023549001:promoter
chrAnn_random	46332900	46333900	1000	hypo	112	90	288	31	55.45	90.28	0.00063	20	28	GSBRNA2T00026230001:promoter
chrAnn_random	46332900	46333900	1000	hypo	112	90	288	31	55.45	90.28	0.00063	20	28	GSBRNA2T00026230001:promoter,GSBRNA2T00026233001:exon
chrAnn_random	47019600	47020100	500	hypo	0	64	82	112	0	42.27	5.56e-07	7	15	GSBRNA2T00028332001:promoter
chrAnn_random	47019600	47020100	500	hypo	0	64	82	112	0	42.27	5.56e-07	7	15	GSBRNA2T00028332001:promoter,GSBRNA2T00028332001:exon
chrAnn_random	47326500	47327000	500	hypo	5	36	66	24	12.2	73.33	8.68e-05	5	11	GSBRNA2T00029803001:promoter
chrAnn_random	48066200	48066700	500	hypo	0	48	30	31	0	49.18	7.05e-06	6	7	GSBRNA2T00033703001:promoter
chrC01	5035500	5036000	500	hypo	0	60	76	145	0	34.39	1e-05	6	14	GSBRNA2T00123023001:promoter
chrC01	5035500	5036000	500	hypo	0	60	76	145	0	34.39	1e-05	6	14	GSBRNA2T00123023001:promoter,GSBRNA2T00123023001:exon
chrC01	5219100	5220100	1000	hypo	1	117	142	178	0.85	44.38	1.47e-11	14	28	GSBRNA2T00123061001:promoter
chrC01	5219100	5220100	1000	hypo	1	117	142	178	0.85	44.38	1.47e-11	14	28	GSBRNA2T00123061001:promoter,GSBRNA2T00123061001:exon,GSBRNA2T00123062001:exon
chrC01	7703800	7704300	500	hypo	0	47	80	119	0	40.2	2.38e-05	6	18	GSBRNA2T00138097001:promoter
chrC01	7703800	7704300	500	hypo	0	47	80	119	0	40.2	2.38e-05	6	18	GSBRNA2T00138097001:promoter,GSBRNA2T00138097001:exon
chrC01	9979500	9980000	500	hypo	6	33	43	3	15.38	93.48	7.16e-05	5	7	GSBRNA2T00048750001:intron
chrC01	11178000	11178500	500	hypo	0	53	30	31	0	49.18	2.63e-06	8	10	GSBRNA2T00116110001:promoter
chrC01	11178000	11178500	500	hypo	0	53	30	31	0	49.18	2.63e-06	8	10	GSBRNA2T00116110001:promoter,GSBRNA2T00116109001:exon,GSBRNA2T00116109001:exon
chrC01	14255300	14255800	500	hypo	0	31	16	27	0	37.21	0.00139	5	7	GSBRNA2T00006288001:exon,GSBRNA2T00006288001:exon
chrC01	16870000	16870500	500	hypo	0	27	149	24	0	86.13	3.02e-06	5	12	GSBRNA2T00090781001:promoter
chrC01	16870000	16870500	500	hypo	0	27	149	24	0	86.13	3.02e-06	5	12	GSBRNA2T00090781001:promoter,GSBRNA2T00090781001:exon
chrC01	22031300	22031800	500	hypo	0	37	143	23	0	86.14	6.58e-08	6	11	GSBRNA2T00126024001:intron
chrC01	24174900	24175400	500	hypo	0	69	41	15	0	73.21	4.86e-10	6	6	GSBRNA2T00001721001:promoter,GSBRNA2T00001722001:promoter
chrC01	24174900	24175400	500	hypo	0	69	41	15	0	73.21	4.86e-10	6	6	GSBRNA2T00001721001:promoter,GSBRNA2T00001722001:promoter,GSBRNA2T00001722001:exon,GSBRNA2T00001722001:exon
chrC01	24410000	24410500	500	hypo	0	91	159	126	0	55.79	9.8e-12	6	21	GSBRNA2T00001777001:promoter
chrC01	24410000	24410500	500	hypo	0	91	159	126	0	55.79	9.8e-12	6	21	GSBRNA2T00001777001:promoter,GSBRNA2T00001776001:exon
chrC01	24419900	24420400	500	hypo	6	94	94	133	6	41.41	6.38e-07	5	16	GSBRNA2T00001781001:promoter,GSBRNA2T00001782001:promoter
chrC01	24419900	24420400	500	hypo	6	94	94	133	6	41.41	6.38e-07	5	16	GSBRNA2T00001781001:promoter,GSBRNA2T00001782001:promoter,GSBRNA2T00001781001:exon
chrC01	35660600	35661100	500	hypo	0	32	24	12	0	66.67	3.16e-05	5	6	GSBRNA2T00051814001:promoter
chrC01	35660600	35661100	500	hypo	0	32	24	12	0	66.67	3.16e-05	5	6	GSBRNA2T00051814001:promoter,GSBRNA2T00051814001:exon,GSBRNA2T00051814001:exon,GSBRNA2T00051814001:exon
chrC01	38126100	38126600	500	hypo	0	36	74	5	0	93.67	8.83e-08	5	12	GSBRNA2T00018544001:promoter
chrC01_random	1714300	1714800	500	hypo	13	34	203	28	27.66	87.88	0.000238	9	16	GSBRNA2T00005160001:promoter
chrC01_random	1714300	1714800	500	hypo	13	34	203	28	27.66	87.88	0.000238	9	16	GSBRNA2T00005160001:promoter,GSBRNA2T00005161001:exon
chrC01_random	1858600	1859100	500	hypo	0	44	49	32	0	60.49	1.55e-06	8	8	GSBRNA2T00082554001:promoter
chrC01_random	3844100	3844600	500	hypo	0	25	118	29	0	80.27	1.48e-05	5	6	GSBRNA2T00097155001:promoter,GSBRNA2T00097154001:promoter
chrC01_random	3844100	3844600	500	hypo	0	25	118	29	0	80.27	1.48e-05	5	6	GSBRNA2T00097155001:promoter,GSBRNA2T00097154001:promoter,GSBRNA2T00097155001:exon
chrC02	4332500	4333000	500	hypo	0	47	84	107	0	43.98	1.05e-05	5	10	GSBRNA2T00114763001:promoter
chrC02	4332500	4333000	500	hypo	0	47	84	107	0	43.98	1.05e-05	5	10	GSBRNA2T00114763001:promoter,GSBRNA2T00114762001:exon,GSBRNA2T00114762001:exon
chrC02	6442000	6442500	500	hypo	0	25	266	122	0	68.56	4.34e-05	5	22	GSBRNA2T00114941001:promoter,GSBRNA2T00114942001:promoter
chrC02	7762600	7763100	500	hypo	1	105	84	44	0.94	65.62	1.59e-13	7	14	GSBRNA2T00073727001:promoter
chrC02	7762600	7763100	500	hypo	1	105	84	44	0.94	65.62	1.59e-13	7	14	GSBRNA2T00073727001:promoter,GSBRNA2T00073727001:exon
chrC02	14802400	14803900	1500	hypo	134	120	849	77	52.76	91.68	1.89e-06	28	38	GSBRNA2T00135267001:promoter
chrC02	14802400	14803900	1500	hypo	134	120	849	77	52.76	91.68	1.89e-06	28	38	GSBRNA2T00135267001:promoter,GSBRNA2T00135267001:exon,GSBRNA2T00135267001:exon
chrC02	16388500	16389000	500	hypo	9	30	77	6	23.08	92.77	0.000289	5	8	GSBRNA2T00030971001:promoter
chrC02	25628800	25629300	500	hypo	5	40	82	1	11.11	98.8	5.44e-07	5	9	GSBRNA2T00113247001:promoter
chrC02	38586700	38587200	500	hypo	0	40	64	1	0	98.46	1.59e-08	7	9	GSBRNA2T00108385001:promoter,GSBRNA2T00108386001:promoter
chrC02	38586700	38587200	500	hypo	0	40	64	1	0	98.46	1.59e-08	7	9	GSBRNA2T00108385001:promoter,GSBRNA2T00108386001:promoter,GSBRNA2T00108385001:exon
chrC02	43559000	43559500	500	hypo	0	33	20	52	0	27.78	0.00347	5	7	GSBRNA2T00120210001:promoter,GSBRNA2T00120209001:promoter
chrC02	43559000	43559500	500	hypo	0	33	20	52	0	27.78	0.00347	5	7	GSBRNA2T00120210001:promoter,GSBRNA2T00120209001:promoter,GSBRNA2T00120210001:exon
chrC02_random	1662000	1662500	500	hypo	0	40	117	107	0	52.23	8.57e-06	8	20	GSBRNA2T00003848001:promoter
chrC02_random	3312800	3313300	500	hypo	0	35	38	15	0	71.7	4.77e-06	6	7	GSBRNA2T00022707001:exon,GSBRNA2T00022707001:exon
chrC03	354400	355400	1000	hypo	95	62	271	26	60.51	91.25	0.00779	15	14	GSBRNA2T00134211001:exon
chrC03	1292500	1293000	500	hypo	0	27	86	29	0	74.78	1.66e-05	5	11	GSBRNA2T00134450001:exon,GSBRNA2T00134450001:exon
chrC03	1678000	1678500	500	hypo	0	42	234	27	0	89.66	2.99e-09	6	9	GSBRNA2T00134534001:exon
chrC03	3202500	3203000	500	hypo	5	62	15	15	7.46	50	0.000225	9	6	GSBRNA2T00140429001:exon
chrC03	3337200	3337700	500	hypo	0	39	86	74	0	53.75	9.92e-06	6	18	GSBRNA2T00140462001:promoter,GSBRNA2T00140463001:promoter
chrC03	3337200	3337700	500	hypo	0	39	86	74	0	53.75	9.92e-06	6	18	GSBRNA2T00140462001:promoter,GSBRNA2T00140463001:promoter,GSBRNA2T00140462001:exon,GSBRNA2T00140462001:exon
chrC03	5777500	5778000	500	hypo	1	45	57	5	2.17	91.94	2.51e-08	7	6	GSBRNA2T00141067001:promoter
chrC03	11857700	11858200	500	hypo	0	50	47	66	0	41.59	1.36e-05	7	12	GSBRNA2T00079069001:promoter
chrC03	11857700	11858200	500	hypo	0	50	47	66	0	41.59	1.36e-05	7	12	GSBRNA2T00079069001:promoter,GSBRNA2T00079068001:exon,GSBRNA2T00079068001:exon
chrC03	11860400	11860900	500	hypo	0	39	32	24	0	57.14	1.34e-05	5	8	GSBRNA2T00079068001:exon
chrC03	12281700	12282200	500	hypo	0	37	27	29	0	48.21	8.12e-05	7	7	GSBRNA2T00028729001:promoter
chrC03	12281700	12282200	500	hypo	0	37	27	29	0	48.21	8.12e-05	7	7	GSBRNA2T00028729001:promoter,GSBRNA2T00028729001:exon
chrC03	18244900	18245400	500	hypo	0	35	178	11	0	94.18	3.4e-08	6	11	GSBRNA2T00015675001:promoter
chrC03	20264400	20264900	500	hypo	7	40	38	4	14.89	90.48	3.29e-05	5	6	GSBRNA2T00153674001:exon,GSBRNA2T00153674001:exon
chrC03	23944800	23945800	1000	hypo	63	50	115	4	55.75	96.64	0.00695	15	19	GSBRNA2T00123753001:promoter
chrC03	25202100	25202600	500	hypo	10	24	150	10	29.41	93.75	0.00137	5	13	GSBRNA2T00123968001:promoter
chrC03	28242700	28244200	1500	hypo	3	1004	252	965	0.3	20.71	5.57e-42	25	35	GSBRNA2T00158381001:exon
chrC03	29730000	29730500	500	hypo	3	22	114	10	12	91.94	0.000177	5	14	GSBRNA2T00085257001:promoter
chrC03	33299500	33300000	500	hypo	2	38	58	6	5	90.62	6.89e-07	6	5	GSBRNA2T00062136001:promoter,GSBRNA2T00062135001:promoter
chrC03	33556900	33557400	500	hypo	0	30	103	4	0	96.26	3.83e-07	6	5	GSBRNA2T00062182001:exon
chrC03	36726000	36726500	500	hypo	4	22	182	16	15.38	91.92	0.000252	5	11	GSBRNA2T00145730001:promoter
chrC03	38098000	38098500	500	hypo	29	52	176	14	35.8	92.63	5.47e-05	8	16	GSBRNA2T00129157001:exon
chrC03	44561300	44561800	500	hypo	0	33	58	13	0	81.69	1.53e-06	5	9	GSBRNA2T00143996001:promoter
chrC03	44561300	44561800	500	hypo	0	33	58	13	0	81.69	1.53e-06	5	9	GSBRNA2T00143996001:promoter,GSBRNA2T00143996001:exon
chrC03	45254200	45254700	500	hypo	0	57	206	78	0	72.54	5.65e-10	5	11	GSBRNA2T00144111001:promoter
chrC03	45333400	45333900	500	hypo	0	34	118	15	0	88.72	1.76e-07	6	9	GSBRNA2T00144120001:exon
chrC03	49319600	49320100	500	hypo	0	65	71	47	0	60.17	5.83e-09	8	11	GSBRNA2T00061070001:promoter
chrC03	50823800	50824300	500	hypo	0	31	33	27	0	55	0.000108	5	6	GSBRNA2T00018997001:promoter
chrC03	50930500	50931000	500	hypo	20	76	126	28	20.83	81.82	1.88e-07	5	7	GSBRNA2T00019006001:exon,GSBRNA2T00019006001:exon
chrC04	1795000	1795500	500	hypo	0	38	132	49	0	72.93	4.02e-07	5	13	GSBRNA2T00003614001:exon
chrC04	2278800	2279800	1000	hypo	0	90	301	15	0	95.25	2.25e-18	11	23	GSBRNA2T00002250001:exon,GSBRNA2T00002250001:exon,GSBRNA2T00002250001:exon
chrC04	4108700	4109200	500	hypo	0	40	150	36	0	80.65	5.02e-08	5	8	GSBRNA2T00012554001:promoter
chrC04	6796200	6796700	500	hypo	5	30	60	32	14.29	65.22	0.00134	6	11	GSBRNA2T00141164001:promoter
chrC04	6796200	6796700	500	hypo	5	30	60	32	14.29	65.22	0.00134	6	11	GSBRNA2T00141164001:promoter,GSBRNA2T00141163001:exon
chrC04	6902000	6902500	500	hypo	9	144	130	154	5.88	45.77	7.13e-11	8	19	GSBRNA2T00141182001:promoter
chrC04	6902000	6902500	500	hypo	9	144	130	154	5.88	45.77	7.13e-11	8	19	GSBRNA2T00141182001:promoter,GSBRNA2T00141181001:exon,GSBRNA2T00141181001:exon
chrC04	13109800	13110300	500	hypo	0	35	234	93	0	71.56	9.46e-07	7	31	GSBRNA2T00090076001:exon
chrC04	21820100	21820600	500	hypo	1	32	388	52	3.03	88.18	4.57e-07	5	16	GSBRNA2T00156741001:exon,GSBRNA2T00156741001:exon,GSBRNA2T00156741001:exon
chrC04	23773700	23774200	500	hypo	0	55	257	21	0	92.45	7.82e-12	7	20	GSBRNA2T00110462001:intron
chrC04	27859200	27859700	500	hypo	0	49	44	160	0	21.57	0.0014	5	13	GSBRNA2T00071068001:promoter
chrC04	27859200	27859700	500	hypo	0	49	44	160	0	21.57	0.0014	5	13	GSBRNA2T00071068001:promoter,GSBRNA2T00071068001:exon
chrC04	34601200	34601700	500	hypo	0	35	79	145	0	35.27	0.000559	6	14	GSBRNA2T00060432001:promoter
chrC04	41492200	41492700	500	hypo	6	129	148	10	4.44	93.67	7.54e-20	10	7	GSBRNA2T00105215001:promoter
chrC04	41517400	41517900	500	hypo	0	26	45	2	0	95.74	5.79e-06	5	6	GSBRNA2T00105208001:exon
chrC04	43728000	43728500	500	hypo	6	154	83	173	3.75	32.42	7.39e-09	7	8	GSBRNA2T00024140001:exon
chrC04	44331700	44332200	500	hypo	12	56	50	6	17.65	89.29	4.07e-06	7	7	GSBRNA2T00020693001:promoter
chrC04	44450400	44450900	500	hypo	0	42	59	29	0	67.05	7.4e-07	5	6	GSBRNA2T00051482001:promoter
chrC04	45029600	45030100	500	hypo	0	48	80	65	0	55.17	8.95e-07	8	12	GSBRNA2T00155351001:exon
chrC05	4291700	4292200	500	hypo	0	28	41	12	0	77.36	1.8e-05	5	8	GSBRNA2T00064990001:promoter,GSBRNA2T00064988001:promoter
chrC05	16154100	16154600	500	hypo	0	40	92	79	0	53.8	7.38e-06	6	7	GSBRNA2T00108496001:promoter
chrC05	16154100	16154600	500	hypo	0	40	92	79	0	53.8	7.38e-06	6	7	GSBRNA2T00108496001:promoter,GSBRNA2T00108496001:exon
chrC05	19069500	19070000	500	hypo	0	45	185	46	0	80.09	7.4e-09	5	14	GSBRNA2T00111452001:promoter
chrC05	25783600	25784100	500	hypo	18	28	159	8	39.13	95.21	0.00242	5	7	GSBRNA2T00106358001:promoter
chrC05	27422700	27423200	500	hypo	0	42	122	8	0	93.85	3.74e-09	6	7	GSBRNA2T00075821001:promoter,GSBRNA2T00075820001:promoter,GSBRNA2T00075822001:promoter
chrC05	27422700	27423200	500	hypo	0	42	122	8	0	93.85	3.74e-09	6	7	GSBRNA2T00075821001:promoter,GSBRNA2T00075820001:promoter,GSBRNA2T00075822001:promoter,GSBRNA2T00075821001:exon
chrC05	40254900	40255400	500	hypo	12	80	69	80	13.04	46.31	0.0001	10	14	GSBRNA2T00073242001:exon,GSBRNA2T00073242001:exon
chrC05	40747500	40748000	500	hypo	0	56	121	117	0	50.84	2.45e-07	7	17	GSBRNA2T00038974001:promoter
chrC05	40747500	40748000	500	hypo	0	56	121	117	0	50.84	2.45e-07	7	17	GSBRNA2T00038974001:promoter,GSBRNA2T00038974001:exon
chrC05_random	1408400	1408900	500	hypo	0	40	28	70	0	28.57	0.00108	5	10	GSBRNA2T00083618001:exon,GSBRNA2T00083618001:exon
chrC06	2043700	2044200	500	hypo	0	131	21	34	0	38.18	2.2e-10	10	8	GSBRNA2T00013262001:promoter
chrC06	2043700	2044200	500	hypo	0	131	21	34	0	38.18	2.2e-10	10	8	GSBRNA2T00013262001:promoter,GSBRNA2T00013262001:exon
chrC06	4672900	4673400	500	hypo	0	41	72	95	0	43.11	4.55e-05	6	11	GSBRNA2T00029104001:exon
chrC06	4833200	4833700	500	hypo	0	85	117	106	0	52.47	2.11e-10	5	14	GSBRNA2T00029148001:promoter
chrC06	6162400	6162900	500	hypo	0	35	100	28	0	78.12	6.46e-07	5	14	GSBRNA2T00069077001:promoter
chrC06	7156700	7157700	1000	hypo	15	88	87	69	14.56	55.77	4.86e-06	14	17	GSBRNA2T00062312001:exon
chrC06	12905700	12906200	500	hypo	9	47	102	27	16.07	79.07	8.23e-06	5	6	GSBRNA2T00034746001:promoter
chrC06	12905700	12906200	500	hypo	9	47	102	27	16.07	79.07	8.23e-06	5	6	GSBRNA2T00034746001:promoter,GSBRNA2T00034747001:exon,GSBRNA2T00034747001:exon
chrC06	13792800	13793300	500	hypo	1	24	52	48	4	52	0.00175	5	12	GSBRNA2T00122540001:promoter
chrC06	13792800	13793300	500	hypo	1	24	52	48	4	52	0.00175	5	12	GSBRNA2T00122540001:promoter,GSBRNA2T00122540001:exon
chrC06	16102600	16103100	500	hypo	3	37	40	1	7.5	97.56	2.33e-06	5	6	GSBRNA2T00049938001:promoter
chrC06	17666100	17667100	1000	hypo	156	148	897	103	51.32	89.7	2.27e-07	22	42	GSBRNA2T00124643001:intron
chrC06	22137900	22139600	1700	hypo	366	208	540	105	63.76	83.72	0.00213	17	40	GSBRNA2T00131949001:promoter,GSBRNA2T00131950001:promoter
chrC06	26072100	26072600	500	hypo	3	22	60	0	12	100	0.000153	5	11	GSBRNA2T00097183001:promoter
chrC06	26072100	26072600	500	hypo	3	22	60	0	12	100	0.000153	5	11	GSBRNA2T00097183001:promoter,GSBRNA2T00097183001:exon,GSBRNA2T00097183001:exon
chrC06	29789900	29790400	500	hypo	0	55	34	129	0	20.86	0.000925	6	14	GSBRNA2T00112981001:promoter
chrC06	29789900	29790400	500	hypo	0	55	34	129	0	20.86	0.000925	6	14	GSBRNA2T00112981001:promoter,GSBRNA2T00112982001:exon
chrC06	34364500	34365000	500	hypo	10	69	96	7	12.66	93.2	1.77e-09	6	8	GSBRNA2T00103547001:promoter
chrC06	34645800	34646300	500	hypo	0	25	128	45	0	73.99	2.87e-05	5	17	GSBRNA2T00103624001:promoter
chrC06	37042400	37042900	500	hypo	56	58	300	18	49.12	94.34	0.000295	13	17	GSBRNA2T00068854001:promoter
chrC06	37180100	37180600	500	hypo	0	67	28	53	0	34.57	6.07e-06	9	14	GSBRNA2T00068876001:exon
chrC06_random	1534700	1535200	500	hypo	19	40	41	0	32.2	100	0.000812	5	5	GSBRNA2T00098237001:exon
chrC07	2631300	2631800	500	hypo	5	23	228	9	17.86	96.2	0.000164	5	25	GSBRNA2T00137922001:promoter,GSBRNA2T00137921001:promoter
chrC07	13969200	13970200	1000	hypo	2	97	101	189	2.02	34.83	1.5e-07	11	20	GSBRNA2T00105691001:exon
chrC07	14121900	14122400	500	hypo	0	35	121	10	0	92.37	7.03e-08	5	11	GSBRNA2T00105666001:exon,GSBRNA2T00105666001:exon
chrC07	25226300	25226800	500	hypo	19	28	219	31	40.43	87.6	0.00613	6	19	GSBRNA2T00067015001:promoter
chrC07	27036000	27036500	500	hypo	0	28	21	44	0	32.31	0.00379	5	7	GSBRNA2T00128828001:exon,GSBRNA2T00128828001:exon,GSBRNA2T00128828001:exon
chrC07	29084200	29084700	500	hypo	20	402	238	549	4.74	30.24	6.17e-18	8	21	GSBRNA2T00139134001:promoter
chrC07	29954600	29955100	500	hypo	14	23	86	5	37.84	94.51	0.00736	5	10	GSBRNA2T00139268001:promoter
chrC07	32568100	32568600	500	hypo	13	80	83	65	13.98	56.08	7.84e-06	6	11	GSBRNA2T00143043001:promoter
chrC07	32600000	32600500	500	hypo	0	41	41	69	0	37.27	0.000168	5	8	GSBRNA2T00143053001:promoter,GSBRNA2T00143052001:promoter
chrC07	32600000	32600500	500	hypo	0	41	41	69	0	37.27	0.000168	5	8	GSBRNA2T00143053001:promoter,GSBRNA2T00143052001:promoter,GSBRNA2T00143051001:exon,GSBRNA2T00143051001:exon
chrC07	33325300	33325800	500	hypo	24	32	170	22	42.86	88.54	0.00566	5	8	GSBRNA2T00133789001:promoter
chrC07	33642800	33643300	500	hypo	23	53	45	9	30.26	83.33	0.000993	6	6	GSBRNA2T00133718001:exon,GSBRNA2T00133718001:exon
chrC07	41927200	41929500	2300	hypo	175	112	1548	202	60.98	88.46	0.000252	23	36	GSBRNA2T00099689001:promoter
chrC07	41927200	41929500	2300	hypo	175	112	1548	202	60.98	88.46	0.000252	23	36	GSBRNA2T00099689001:promoter,GSBRNA2T00099689001:exon,GSBRNA2T00099689001:exon
chrC07	42989900	42990400	500	hypo	22	120	252	46	15.49	84.56	6.92e-14	5	5	GSBRNA2T00099925001:promoter
chrC07	43799500	43800000	500	hypo	0	37	112	79	0	58.64	6.3e-06	5	13	GSBRNA2T00100121001:exon
chrC08	686000	686500	500	hypo	4	31	174	155	11.43	52.89	0.00182	7	20	GSBRNA2T00145257001:promoter
chrC08	9843000	9843500	500	hypo	0	43	141	4	0	97.24	1.12e-09	5	17	GSBRNA2T00153375001:exon,GSBRNA2T00153375001:exon
chrC08	15017100	15017600	500	hypo	0	32	94	46	0	67.14	8.25e-06	6	18	GSBRNA2T00001217001:promoter
chrC08	15017100	15017600	500	hypo	0	32	94	46	0	67.14	8.25e-06	6	18	GSBRNA2T00001217001:promoter,GSBRNA2T00001217001:exon
chrC08	17088400	17088900	500	hypo	12	34	366	20	26.09	94.82	3.86e-05	6	13	GSBRNA2T00000991001:exon
chrC08	19864600	19865600	1000	hypo	0	80	86	229	0	27.3	4.86e-06	12	26	GSBRNA2T00047396001:promoter,GSBRNA2T00047395001:promoter
chrC08	19868700	19869700	1000	hypo	2	146	114	197	1.35	36.66	2.26e-11	16	34	GSBRNA2T00047398001:promoter
chrC08	19968000	19968500	500	hypo	0	40	62	40	0	60.78	3.15e-06	5	11	GSBRNA2T00047419001:exon
chrC08	22531000	22531500	500	hypo	0	40	92	25	0	78.63	1.26e-07	6	12	GSBRNA2T00055036001:promoter
chrC08	22743600	22744800	1200	hypo	20	84	218	43	19.23	83.52	2.43e-09	13	25	GSBRNA2T00066637001:promoter,GSBRNA2T00066636001:promoter
chrC08	22743600	22744800	1200	hypo	20	84	218	43	19.23	83.52	2.43e-09	13	25	GSBRNA2T00066637001:promoter,GSBRNA2T00066636001:promoter,GSBRNA2T00066637001:exon,GSBRNA2T00066637001:exon
chrC08	27365800	27366300	500	hypo	0	50	37	36	0	50.68	2.91e-06	6	8	GSBRNA2T00108926001:promoter
chrC08	27365800	27366300	500	hypo	0	50	37	36	0	50.68	2.91e-06	6	8	GSBRNA2T00108926001:promoter,GSBRNA2T00108926001:exon
chrC08	29165200	29166700	1500	hypo	9	176	536	53	4.86	91	2.76e-29	22	21	GSBRNA2T00155794001:promoter
chrC08	31524700	31525200	500	hypo	1	25	53	22	3.85	70.67	0.000187	5	7	GSBRNA2T00127158001:promoter
chrC08	31524700	31525200	500	hypo	1	25	53	22	3.85	70.67	0.000187	5	7	GSBRNA2T00127158001:promoter,GSBRNA2T00127159001:exon
chrC08	33335500	33336000	500	hypo	0	28	143	87	0	62.17	4.41e-05	5	19	GSBRNA2T00127511001:promoter,GSBRNA2T00127512001:promoter
chrC08	37156400	37156900	500	hypo	0	40	40	22	0	64.52	2.97e-06	5	6	GSBRNA2T00019382001:promoter,GSBRNA2T00019380001:promoter
chrC09	3076900	3077400	500	hypo	0	25	166	67	0	71.24	3.56e-05	5	21	GSBRNA2T00146142001:promoter
chrC09	16234000	16234500	500	hypo	0	69	137	5	0	96.48	7.7e-14	9	11	GSBRNA2T00115725001:promoter,GSBRNA2T00115724001:promoter
chrC09	16234000	16234500	500	hypo	0	69	137	5	0	96.48	7.7e-14	9	11	GSBRNA2T00115725001:promoter,GSBRNA2T00115724001:promoter,GSBRNA2T00115725001:exon
chrC09	16235700	16236700	1000	hypo	0	85	96	5	0	95.05	2.29e-15	13	14	GSBRNA2T00115724001:promoter,GSBRNA2T00115723001:promoter
chrC09	16235700	16236700	1000	hypo	0	85	96	5	0	95.05	2.29e-15	13	14	GSBRNA2T00115724001:promoter,GSBRNA2T00115723001:promoter,GSBRNA2T00115724001:exon,GSBRNA2T00115724001:exon,GSBRNA2T00115724001:exon
chrC09	21957000	21957500	500	hypo	0	33	121	15	0	88.97	2.42e-07	5	11	GSBRNA2T00071164001:promoter
chrC09	21957000	21957500	500	hypo	0	33	121	15	0	88.97	2.42e-07	5	11	GSBRNA2T00071164001:promoter,GSBRNA2T00071164001:exon
chrC09	36869600	36870100	500	hypo	3	81	57	51	3.57	52.78	3.58e-08	8	13	GSBRNA2T00077448001:exon
chrC09	37244700	37245200	500	hypo	0	40	553	149	0	78.77	2.92e-08	5	19	GSBRNA2T00133384001:promoter
chrC09	39301200	39301700	500	hypo	5	31	104	7	13.89	93.69	1.76e-05	5	8	GSBRNA2T00003501001:promoter
chrC09	39301200	39301700	500	hypo	5	31	104	7	13.89	93.69	1.76e-05	5	8	GSBRNA2T00003501001:promoter,GSBRNA2T00003501001:exon,GSBRNA2T00003502001:exon
chrC09	39947700	39948200	500	hypo	0	36	75	23	0	76.53	8.07e-07	5	11	GSBRNA2T00094436001:promoter
chrC09	40423900	40424400	500	hypo	0	40	55	9	0	85.94	1.06e-07	5	8	GSBRNA2T00094362001:promoter
chrC09	40423900	40424400	500	hypo	0	40	55	9	0	85.94	1.06e-07	5	8	GSBRNA2T00094362001:promoter,GSBRNA2T00094362001:exon
chrC09	42053200	42053700	500	hypo	1	48	314	19	2.04	94.29	1.89e-10	8	10	GSBRNA2T00032634001:exon
chrC09	46871400	46871900	500	hypo	0	44	95	181	0	34.42	0.000132	7	22	GSBRNA2T00015968001:promoter,GSBRNA2T00015967001:promoter
chrC09_random	1942000	1942500	500	hypo	110	70	818	82	61.11	90.89	0.00222	8	8	GSBRNA2T00027812001:promoter,GSBRNA2T00027813001:promoter
chrC09_random	1942000	1942500	500	hypo	110	70	818	82	61.11	90.89	0.00222	8	8	GSBRNA2T00027812001:promoter,GSBRNA2T00027813001:promoter,GSBRNA2T00027812001:exon,GSBRNA2T00027813001:exon
chrCnn_random	183400	183900	500	hypo	0	85	33	20	0	62.26	2.05e-10	12	6	GSBRNA2T00110728001:promoter
chrCnn_random	183400	183900	500	hypo	0	85	33	20	0	62.26	2.05e-10	12	6	GSBRNA2T00110728001:promoter,GSBRNA2T00110728001:exon
chrCnn_random	1205800	1206300	500	hypo	11	47	284	23	18.97	92.51	3.84e-07	6	8	GSBRNA2T00110885001:promoter,GSBRNA2T00123412001:promoter
chrCnn_random	1205800	1206300	500	hypo	11	47	284	23	18.97	92.51	3.84e-07	6	8	GSBRNA2T00110885001:promoter,GSBRNA2T00123412001:promoter,GSBRNA2T00123412001:exon,GSBRNA2T00123412001:exon
chrCnn_random	1209200	1209700	500	hypo	0	69	540	54	0	90.91	1.15e-14	6	6	GSBRNA2T00123412001:intron
chrCnn_random	1253800	1254300	500	hypo	42	50	117	13	45.65	90	0.00245	9	9	GSBRNA2T00123428001:promoter,GSBRNA2T00123426001:promoter
chrCnn_random	8142300	8143300	1000	hypo	0	122	76	146	0	34.23	7.12e-10	16	23	GSBRNA2T00065072001:exon,GSBRNA2T00065072001:exon,GSBRNA2T00065072001:exon,GSBRNA2T00065072001:exon
chrCnn_random	8304500	8305000	500	hypo	0	40	25	52	0	32.47	0.000562	7	10	GSBRNA2T00065113001:exon,GSBRNA2T00065113001:exon,GSBRNA2T00065113001:exon
chrCnn_random	13817100	13817600	500	hypo	1	60	99	43	1.64	69.72	3.77e-09	7	10	GSBRNA2T00087213001:exon
chrCnn_random	18093000	18093500	500	hypo	43	115	340	89	27.22	79.25	3.79e-09	7	8	GSBRNA2T00096682001:intron
chrCnn_random	19437500	19438500	1000	hypo	16	77	165	17	17.2	90.66	9.42e-10	12	17	GSBRNA2T00003226001:promoter
chrCnn_random	19437500	19438500	1000	hypo	16	77	165	17	17.2	90.66	9.42e-10	12	17	GSBRNA2T00003226001:promoter,GSBRNA2T00003223001:exon
chrCnn_random	22033100	22033600	500	hypo	2	53	38	56	3.64	40.43	9.43e-05	5	8	GSBRNA2T00008028001:exon,GSBRNA2T00008028001:exon
chrCnn_random	22640100	22640600	500	hypo	0	31	35	22	0	61.4	4.91e-05	5	7	GSBRNA2T00008431001:promoter
chrCnn_random	25262100	25262600	500	hypo	12	54	52	30	18.18	63.41	0.000341	7	9	GSBRNA2T00013896001:promoter
chrCnn_random	25262100	25262600	500	hypo	12	54	52	30	18.18	63.41	0.000341	7	9	GSBRNA2T00013896001:promoter,GSBRNA2T00013894001:exon
chrCnn_random	31999600	32000100	500	hypo	0	41	53	77	0	40.77	8.02e-05	5	17	GSBRNA2T00025132001:promoter,GSBRNA2T00025130001:promoter
chrCnn_random	31999600	32000100	500	hypo	0	41	53	77	0	40.77	8.02e-05	5	17	GSBRNA2T00025132001:promoter,GSBRNA2T00025130001:promoter,GSBRNA2T00025130001:exon,GSBRNA2T00025130001:exon
chrCnn_random	32010700	32011200	500	hypo	2	97	42	86	2.02	32.81	9.34e-07	11	11	GSBRNA2T00025134001:exon
chrCnn_random	34733900	34734400	500	hypo	15	22	112	5	40.54	95.73	0.00869	5	13	GSBRNA2T00029586001:exon,GSBRNA2T00029586001:exon
chrCnn_random	39318000	39318500	500	hypo	0	52	53	2	0	96.36	6.52e-10	5	7	GSBRNA2T00037483001:promoter
chrCnn_random	41986300	41986800	500	hypo	0	35	42	32	0	56.76	2.79e-05	5	7	GSBRNA2T00040740001:exon,GSBRNA2T00040740001:exon
chrCnn_random	46002500	46003000	500	hypo	4	56	37	62	6.67	37.37	0.000616	5	8	GSBRNA2T00045615001:exon,GSBRNA2T00045615001:exon
chrCnn_random	46696000	46696500	500	hypo	271	222	246	21	54.97	92.13	8.4e-06	22	23	GSBRNA2T00046693001:promoter
chrCnn_random	47938300	47938800	500	hypo	0	49	136	28	0	82.93	1.61e-09	5	9	GSBRNA2T00048193001:intron
chrCnn_random	51407600	51408100	500	hypo	67	72	119	9	48.2	92.97	0.000745	6	6	GSBRNA2T00055551001:promoter
chrCnn_random	51409500	51410500	1000	hypo	84	91	116	3	48	97.48	0.000129	21	15	GSBRNA2T00055551001:promoter
chrCnn_random	51409500	51410500	1000	hypo	84	91	116	3	48	97.48	0.000129	21	15	GSBRNA2T00055551001:promoter,GSBRNA2T00055551001:exon,GSBRNA2T00055551001:exon
chrCnn_random	51480800	51481300	500	hypo	0	36	98	85	0	53.55	2.02e-05	6	16	GSBRNA2T00055597001:promoter
chrCnn_random	53678200	53678700	500	hypo	0	48	45	19	0	70.31	1.36e-07	7	6	GSBRNA2T00059758001:exon,GSBRNA2T00059758001:exon,GSBRNA2T00059758001:exon,GSBRNA2T00059758001:exon
chrCnn_random	54397500	54398000	500	hypo	31	37	195	16	45.59	92.42	0.00271	6	17	GSBRNA2T00062782001:promoter
chrCnn_random	54397500	54398000	500	hypo	31	37	195	16	45.59	92.42	0.00271	6	17	GSBRNA2T00062782001:promoter,GSBRNA2T00062780001:exon
chrCnn_random	55535500	55536000	500	hypo	0	85	36	34	0	51.43	2.46e-09	8	6	GSBRNA2T00065159001:promoter
chrCnn_random	55535500	55536000	500	hypo	0	85	36	34	0	51.43	2.46e-09	8	6	GSBRNA2T00065159001:promoter,GSBRNA2T00065159001:exon
chrCnn_random	58376700	58377200	500	hypo	37	148	60	4	20	93.75	2.99e-10	18	9	GSBRNA2T00073526001:promoter
chrCnn_random	58376700	58377200	500	hypo	37	148	60	4	20	93.75	2.99e-10	18	9	GSBRNA2T00073526001:promoter,GSBRNA2T00073526001:exon
chrCnn_random	58891900	58892400	500	hypo	0	35	42	26	0	61.76	1.44e-05	6	7	GSBRNA2T00074807001:promoter
chrCnn_random	58891900	58892400	500	hypo	0	35	42	26	0	61.76	1.44e-05	6	7	GSBRNA2T00074807001:promoter,GSBRNA2T00074806001:exon,GSBRNA2T00074806001:exon
chrCnn_random	60033600	60034100	500	hypo	0	84	32	39	0	45.07	2.01e-08	6	10	GSBRNA2T00077117001:promoter,GSBRNA2T00077115001:promoter
chrCnn_random	60564300	60564800	500	hypo	0	56	50	15	0	76.92	4.47e-09	9	6	GSBRNA2T00080400001:promoter
chrCnn_random	60564300	60564800	500	hypo	0	56	50	15	0	76.92	4.47e-09	9	6	GSBRNA2T00080400001:promoter,GSBRNA2T00080400001:exon,GSBRNA2T00080400001:exon
chrCnn_random	63231000	63232000	1000	hypo	4	73	191	20	5.19	90.52	1.04e-12	12	22	GSBRNA2T00087396001:exon,GSBRNA2T00087396001:exon,GSBRNA2T00087396001:exon
chrCnn_random	64346500	64347000	500	hypo	0	31	44	15	0	74.58	8.98e-06	5	5	GSBRNA2T00089567001:promoter
chrCnn_random	67532100	67532600	500	hypo	0	45	444	127	0	77.76	5.88e-09	6	30	GSBRNA2T00098199001:promoter
chrCnn_random	70298900	70299400	500	hypo	0	51	340	111	0	75.39	1.33e-09	8	23	GSBRNA2T00008351001:promoter
chrCnn_random	70298900	70299400	500	hypo	0	51	340	111	0	75.39	1.33e-09	8	23	GSBRNA2T00008351001:promoter,GSBRNA2T00008351001:exon
chrCnn_random	70646300	70646800	500	hypo	0	42	188	126	0	59.87	9.46e-07	5	20	GSBRNA2T00008787001:promoter
chrCnn_random	72560800	72561800	1000	hypo	207	148	386	48	58.31	88.94	0.000158	21	23	GSBRNA2T00013853001:promoter
chrCnn_random	72560800	72561800	1000	hypo	207	148	386	48	58.31	88.94	0.000158	21	23	GSBRNA2T00013853001:promoter,GSBRNA2T00013853001:exon
chrCnn_random	73825400	73825900	500	hypo	0	52	83	46	0	64.34	5.06e-08	6	12	GSBRNA2T00016878001:exon,GSBRNA2T00016878001:exon
chrCnn_random	77514200	77515200	1000	hypo	0	155	220	15	0	93.62	2.57e-27	20	23	GSBRNA2T00025543001:promoter
chrCnn_random	77514200	77515200	1000	hypo	0	155	220	15	0	93.62	2.57e-27	20	23	GSBRNA2T00025543001:promoter,GSBRNA2T00025543001:exon
chrCnn_random	79321900	79322900	1000	hypo	40	75	121	13	34.78	90.3	1.35e-05	11	12	GSBRNA2T00029923001:promoter,GSBRNA2T00029922001:promoter
chrCnn_random	79321900	79322900	1000	hypo	40	75	121	13	34.78	90.3	1.35e-05	11	12	GSBRNA2T00029923001:promoter,GSBRNA2T00029922001:promoter,GSBRNA2T00029923001:exon,GSBRNA2T00029922001:exon,GSBRNA2T00029922001:exon
chrCnn_random	80265500	80267500	2000	hypo	5	116	174	90	4.13	65.91	2.98e-14	22	21	GSBRNA2T00033925001:promoter
chrCnn_random	80265500	80267500	2000	hypo	5	116	174	90	4.13	65.91	2.98e-14	22	21	GSBRNA2T00033925001:promoter,GSBRNA2T00033925001:exon,GSBRNA2T00033925001:exon,GSBRNA2T00033925001:exon
chrUnn_random	986400	986900	500	hypo	2	587	137	357	0.34	27.73	6.31e-32	11	26	GSBRNA2T00039458001:promoter
chrUnn_random	2421600	2422100	500	hypo	0	79	53	92	0	36.55	3.16e-07	6	12	GSBRNA2T00057848001:promoter,GSBRNA2T00057836001:promoter,GSBRNA2T00057846001:promoter,GSBRNA2T00057835001:promoter
chrUnn_random	2421600	2422100	500	hypo	0	79	53	92	0	36.55	3.16e-07	6	12	GSBRNA2T00057848001:promoter,GSBRNA2T00057836001:promoter,GSBRNA2T00057846001:promoter,GSBRNA2T00057835001:promoter,GSBRNA2T00057846001:exon,GSBRNA2T00057846001:exon,GSBRNA2T00057846001:exon
chrUnn_random	5893100	5893600	500	hypo	0	31	42	120	0	25.93	0.00531	5	10	GSBRNA2T00008190001:exon
chrUnn_random	6705100	6705600	500	hypo	0	46	19	51	0	27.14	0.000723	7	9	GSBRNA2T00017906001:exon

## Sheet: all.hyper.call.filtered.RBR
DMR(differentially methylated region) show hyper methylation in RBR versus An-subgenome of ZS11
					Test		Control		Methylation			cpG numbers
#chrom	start	end	length	hypo/hyper	Cytosine counts	Thymine counts	Cytosine counts	Thymine counts	Test	Control	P-value	Test	Control	Gene associated regions
chrA01	28100	28600	500	hyper	85	17	62	88	83.33	41.33	0.00080959	14	14	GSBRNA2T00121630001:exon
chrA01	106200	106700	500	hyper	225	25	0	34	90	0	7.7614e-08	15	6	GSBRNA2T00121606001:promoter
chrA01	106200	106700	500	hyper	225	25	0	34	90	0	7.7614e-08	15	6	GSBRNA2T00121606001:promoter,GSBRNA2T00121606001:exon
chrA01	266900	267400	500	hyper	39	0	18	36	100	33.33	0.0016242	5	7	GSBRNA2T00121575001:promoter
chrA01	266900	267400	500	hyper	39	0	18	36	100	33.33	0.0016242	5	7	GSBRNA2T00121575001:promoter
chrA01	325400	325900	500	hyper	202	31	0	216	86.7	0	1.7306e-33	11	9	GSBRNA2T00121564001:promoter
chrA01	325400	325900	500	hyper	202	31	0	216	86.7	0	1.7306e-33	11	9	GSBRNA2T00121564001:promoter
chrA01	470700	471200	500	hyper	39	10	0	59	79.59	0	2.4354e-09	5	6	GSBRNA2T00121533001:exon,GSBRNA2T00121533001:exon,GSBRNA2T00121533001:exon
chrA01	719000	719500	500	hyper	28	3	0	34	90.32	0	1.5489e-06	5	6	GSBRNA2T00121472001:promoter
chrA01	719000	719500	500	hyper	28	3	0	34	90.32	0	1.5489e-06	5	6	GSBRNA2T00121472001:promoter
chrA01	1035300	1035800	500	hyper	38	17	0	36	69.09	0	4.9613e-06	8	5	GSBRNA2T00121390001:exon,GSBRNA2T00121390001:exon
chrA01	1054100	1054600	500	hyper	70	23	0	43	75.27	0	1.2315e-07	7	6	GSBRNA2T00121385001:exon
chrA01	1455600	1456100	500	hyper	29	9	0	38	76.32	0	1.8703e-06	6	6	GSBRNA2T00121290001:promoter
chrA01	1455600	1456100	500	hyper	29	9	0	38	76.32	0	1.8703e-06	6	6	GSBRNA2T00121290001:promoter,GSBRNA2T00121289001:exon,GSBRNA2T00121289001:exon
chrA01	1482500	1483000	500	hyper	61	2	18	34	96.83	34.62	0.0013908	7	6	GSBRNA2T00121281001:exon,GSBRNA2T00121281001:exon,GSBRNA2T00121281001:exon,GSBRNA2T00121281001:exon
chrA01	1603000	1603500	500	hyper	60	84	9	62	41.67	12.68	0.0013264	10	10	GSBRNA2T00121245001:exon,GSBRNA2T00121245001:exon,GSBRNA2T00121245001:exon
chrA01	1861200	1862200	1000	hyper	154	158	0	98	49.36	0	2.4783e-11	24	12	GSBRNA2T00121167001:promoter
chrA01	1861200	1862200	1000	hyper	154	158	0	98	49.36	0	2.4783e-11	24	12	GSBRNA2T00121167001:promoter
chrA01	2283800	2284300	500	hyper	364	70	108	83	83.87	56.54	0.0046857	18	18	GSBRNA2T00121058001:promoter
chrA01	2283800	2284300	500	hyper	364	70	108	83	83.87	56.54	0.0046857	18	18	GSBRNA2T00121058001:promoter
chrA01	2350200	2350700	500	hyper	36	57	0	62	38.71	0	3.8847e-06	9	10	GSBRNA2T00121048001:promoter
chrA01	2350200	2350700	500	hyper	36	57	0	62	38.71	0	3.8847e-06	9	10	GSBRNA2T00121048001:promoter
chrA01	2941800	2942300	500	hyper	21	78	0	72	21.21	0	0.00016903	9	9	GSBRNA2T00039937001:promoter
chrA01	2941800	2942300	500	hyper	21	78	0	72	21.21	0	0.00016903	9	9	GSBRNA2T00039937001:promoter
chrA01	3014800	3015300	500	hyper	51	6	12	49	89.47	19.67	1.9985e-05	5	5	GSBRNA2T00039919001:promoter
chrA01	3014800	3015300	500	hyper	51	6	12	49	89.47	19.67	1.9985e-05	5	5	GSBRNA2T00039919001:promoter
chrA01	3039300	3039800	500	hyper	40	2	10	26	95.24	27.78	0.0026232	5	6	GSBRNA2T00039912001:promoter
chrA01	3039300	3039800	500	hyper	40	2	10	26	95.24	27.78	0.0026232	5	6	GSBRNA2T00039912001:promoter,GSBRNA2T00039913001:exon
chrA01	3096800	3097300	500	hyper	76	25	22	107	75.25	17.05	2.2114e-08	14	10	GSBRNA2T00039899001:exon
chrA01	3110800	3111300	500	hyper	32	39	0	52	45.07	0	6.4212e-06	7	7	GSBRNA2T00039895001:promoter
chrA01	3110800	3111300	500	hyper	32	39	0	52	45.07	0	6.4212e-06	7	7	GSBRNA2T00039895001:promoter
chrA01	3167800	3168300	500	hyper	24	63	0	27	27.59	0	0.0078523	6	5	GSBRNA2T00039881001:exon
chrA01	3210800	3211300	500	hyper	41	30	0	27	57.75	0	0.00018097	8	5	GSBRNA2T00039875001:exon,GSBRNA2T00039875001:exon,GSBRNA2T00039875001:exon
chrA01	3280700	3281200	500	hyper	106	3	22	37	97.25	37.29	0.00060768	10	7	GSBRNA2T00076837001:promoter
chrA01	3280700	3281200	500	hyper	106	3	22	37	97.25	37.29	0.00060768	10	7	GSBRNA2T00076837001:promoter,GSBRNA2T00076838001:exon,GSBRNA2T00076838001:exon,GSBRNA2T00076838001:exon
chrA01	3285400	3285900	500	hyper	15	31	0	35	32.61	0	0.0014041	5	5	GSBRNA2T00076836001:promoter
chrA01	3285400	3285900	500	hyper	15	31	0	35	32.61	0	0.0014041	5	5	GSBRNA2T00076836001:promoter
chrA01	4071100	4071600	500	hyper	232	33	0	30	87.55	0	5.6816e-07	12	5	GSBRNA2T00131246001:promoter
chrA01	4071100	4071600	500	hyper	232	33	0	30	87.55	0	5.6816e-07	12	5	GSBRNA2T00131246001:promoter
chrA01	4394100	4394600	500	hyper	29	10	15	62	74.36	19.48	0.0002251	5	7	GSBRNA2T00131310001:exon,GSBRNA2T00131310001:exon,GSBRNA2T00131310001:exon
chrA01	4485500	4486000	500	hyper	78	67	0	72	53.79	0	4.8815e-09	10	8	GSBRNA2T00131329001:promoter
chrA01	4485500	4486000	500	hyper	78	67	0	72	53.79	0	4.8815e-09	10	8	GSBRNA2T00131329001:promoter
chrA01	4538300	4538800	500	hyper	96	67	0	44	58.9	0	1.0294e-06	11	6	GSBRNA2T00131340001:promoter,GSBRNA2T00131338001:promoter,GSBRNA2T00131339001:promoter
chrA01	4538300	4538800	500	hyper	96	67	0	44	58.9	0	1.0294e-06	11	6	GSBRNA2T00131340001:promoter,GSBRNA2T00131338001:promoter,GSBRNA2T00131339001:promoter
chrA01	4688500	4689000	500	hyper	42	12	13	35	77.78	27.08	0.0040721	5	7	GSBRNA2T00131369001:exon
chrA01	4814000	4814500	500	hyper	15	42	0	88	26.32	0	6.8672e-06	5	6	GSBRNA2T00131398001:promoter
chrA01	4814000	4814500	500	hyper	15	42	0	88	26.32	0	6.8672e-06	5	6	GSBRNA2T00131398001:promoter
chrA01	4843600	4844100	500	hyper	23	24	0	25	48.94	0	0.00099422	6	5	GSBRNA2T00131406001:exon
chrA01	5215500	5216000	500	hyper	145	45	15	67	76.32	18.29	5.8409e-07	11	6	GSBRNA2T00131491001:exon,GSBRNA2T00131491001:exon
chrA01	5229500	5230000	500	hyper	30	26	0	31	53.57	0	0.000137	9	6	GSBRNA2T00131496001:promoter,GSBRNA2T00131495001:promoter
chrA01	5229500	5230000	500	hyper	30	26	0	31	53.57	0	0.000137	9	6	GSBRNA2T00131496001:promoter,GSBRNA2T00131495001:promoter,GSBRNA2T00131495001:exon
chrA01	5262600	5263100	500	hyper	37	75	0	79	33.04	0	1.3037e-06	14	10	GSBRNA2T00131505001:promoter
chrA01	5262600	5263100	500	hyper	37	75	0	79	33.04	0	1.3037e-06	14	10	GSBRNA2T00131505001:promoter
chrA01	5282700	5283200	500	hyper	156	69	0	262	69.33	0	1.1663e-32	9	10	GSBRNA2T00131509001:intron
chrA01	5371200	5372200	1000	hyper	73	54	27	95	57.48	22.13	0.00017252	13	16	GSBRNA2T00131535001:promoter
chrA01	5371200	5372200	1000	hyper	73	54	27	95	57.48	22.13	0.00017252	13	16	GSBRNA2T00131535001:promoter
chrA01	5451300	5451800	500	hyper	60	18	0	35	76.92	0	1.3879e-06	6	5	GSBRNA2T00131556001:promoter
chrA01	5451300	5451800	500	hyper	60	18	0	35	76.92	0	1.3879e-06	6	5	GSBRNA2T00131556001:promoter
chrA01	5494300	5494800	500	hyper	107	13	0	72	89.17	0	3.5968e-13	6	6	GSBRNA2T00131567001:promoter
chrA01	5494300	5494800	500	hyper	107	13	0	72	89.17	0	3.5968e-13	6	6	GSBRNA2T00131567001:promoter
chrA01	5495000	5496000	1000	hyper	286	11	31	49	96.3	38.75	4.2056e-05	26	16	GSBRNA2T00131568001:exon,GSBRNA2T00131568001:exon,GSBRNA2T00131568001:exon
chrA01	5498400	5498900	500	hyper	44	20	0	50	68.75	0	1.0758e-07	7	5	GSBRNA2T00131569001:promoter
chrA01	5498400	5498900	500	hyper	44	20	0	50	68.75	0	1.0758e-07	7	5	GSBRNA2T00131569001:promoter
chrA01	5537800	5538300	500	hyper	70	10	0	83	87.5	0	9.9987e-14	7	8	GSBRNA2T00131576001:promoter
chrA01	5537800	5538300	500	hyper	70	10	0	83	87.5	0	9.9987e-14	7	8	GSBRNA2T00131576001:promoter
chrA01	5678500	5679000	500	hyper	22	21	0	37	51.16	0	6.4459e-05	6	6	GSBRNA2T00131610001:exon
chrA01	5819200	5819700	500	hyper	29	15	1	34	65.91	2.86	4.8643e-05	6	6	GSBRNA2T00131641001:promoter,GSBRNA2T00131640001:promoter
chrA01	5819200	5819700	500	hyper	29	15	1	34	65.91	2.86	4.8643e-05	6	6	GSBRNA2T00131641001:promoter,GSBRNA2T00131640001:promoter
chrA01	5880300	5880800	500	hyper	56	4	20	45	93.33	30.77	0.0003512	8	10	GSBRNA2T00131655001:promoter
chrA01	5880300	5880800	500	hyper	56	4	20	45	93.33	30.77	0.0003512	8	10	GSBRNA2T00131655001:promoter,GSBRNA2T00131654001:exon
chrA01	6419100	6419600	500	hyper	20	13	0	33	60.61	0	5.6205e-05	6	5	GSBRNA2T00072680001:promoter
chrA01	6419100	6419600	500	hyper	20	13	0	33	60.61	0	5.6205e-05	6	5	GSBRNA2T00072680001:promoter
chrA01	6609300	6609800	500	hyper	73	53	0	30	57.94	0	5.837e-05	13	5	GSBRNA2T00079548001:exon,GSBRNA2T00079548001:exon
chrA01	6628300	6628800	500	hyper	110	11	9	57	90.91	13.64	3.8466e-08	12	6	GSBRNA2T00079551001:exon
chrA01	6630100	6630600	500	hyper	96	9	0	73	91.43	0	2.372e-13	13	10	GSBRNA2T00079551001:promoter
chrA01	6630100	6630600	500	hyper	96	9	0	73	91.43	0	2.372e-13	13	10	GSBRNA2T00079551001:promoter,GSBRNA2T00079551001:exon
chrA01	6699500	6700000	500	hyper	66	81	0	74	44.9	0	4.8463e-08	7	7	GSBRNA2T00079562001:exon
chrA01	7224700	7225700	1000	hyper	196	41	66	142	82.7	31.73	1.3434e-08	20	21	GSBRNA2T00056363001:promoter
chrA01	7224700	7225700	1000	hyper	196	41	66	142	82.7	31.73	1.3434e-08	20	21	GSBRNA2T00056363001:promoter,GSBRNA2T00056364001:exon
chrA01	7251500	7252000	500	hyper	53	27	26	186	66.25	12.26	6.7371e-11	9	11	GSBRNA2T00056371001:intron
chrA01	7360300	7361400	1100	hyper	367	134	0	97	73.25	0	4.1101e-16	38	15	GSBRNA2T00149683001:promoter
chrA01	7360300	7361400	1100	hyper	367	134	0	97	73.25	0	4.1101e-16	38	15	GSBRNA2T00149683001:promoter
chrA01	7969900	7970400	500	hyper	21	23	0	54	47.73	0	4.171e-06	6	6	GSBRNA2T00149560001:promoter,GSBRNA2T00149561001:promoter
chrA01	7969900	7970400	500	hyper	21	23	0	54	47.73	0	4.171e-06	6	6	GSBRNA2T00149560001:promoter,GSBRNA2T00149561001:promoter
chrA01	8319900	8321000	1100	hyper	542	63	0	108	89.59	0	2.5973e-21	31	11	GSBRNA2T00149479001:promoter
chrA01	8319900	8321000	1100	hyper	542	63	0	108	89.59	0	2.5973e-21	31	11	GSBRNA2T00149479001:promoter,GSBRNA2T00149479001:exon
chrA01	8359100	8359600	500	hyper	34	18	38	187	65.38	16.89	6.0135e-07	5	5	GSBRNA2T00149472001:promoter
chrA01	8359100	8359600	500	hyper	34	18	38	187	65.38	16.89	6.0135e-07	5	5	GSBRNA2T00149472001:promoter
chrA01	8485200	8485700	500	hyper	79	83	0	39	48.77	0	2.4424e-05	17	6	GSBRNA2T00149452001:promoter
chrA01	8485200	8485700	500	hyper	79	83	0	39	48.77	0	2.4424e-05	17	6	GSBRNA2T00149452001:promoter
chrA01	8489000	8489500	500	hyper	37	28	7	152	56.92	4.4	6.0425e-12	7	13	GSBRNA2T00149452001:exon
chrA01	8938100	8938600	500	hyper	104	114	0	88	47.71	0	6.7824e-10	23	7	GSBRNA2T00149352001:promoter
chrA01	8938100	8938600	500	hyper	104	114	0	88	47.71	0	6.7824e-10	23	7	GSBRNA2T00149352001:promoter,GSBRNA2T00149352001:exon
chrA01	9036200	9036700	500	hyper	77	25	29	74	75.49	28.16	0.00010866	15	10	GSBRNA2T00051715001:promoter
chrA01	9036200	9036700	500	hyper	77	25	29	74	75.49	28.16	0.00010866	15	10	GSBRNA2T00051715001:promoter
chrA01	9230000	9230500	500	hyper	19	49	0	58	27.94	0	0.00013457	8	10	GSBRNA2T00051674001:exon,GSBRNA2T00051674001:exon
chrA01	9263400	9263900	500	hyper	191	16	21	26	92.27	44.68	0.008841	22	7	GSBRNA2T00051669001:intron
chrA01	9275500	9276000	500	hyper	52	26	5	42	66.67	10.64	6.5316e-05	10	7	GSBRNA2T00051667001:exon,GSBRNA2T00051667001:exon,GSBRNA2T00051667001:exon
chrA01	9315900	9317800	1900	hyper	445	50	2	172	89.9	1.15	1.6507e-30	51	24	GSBRNA2T00051653001:promoter
chrA01	9315900	9317800	1900	hyper	445	50	2	172	89.9	1.15	1.6507e-30	51	24	GSBRNA2T00051653001:promoter,GSBRNA2T00051653001:exon,GSBRNA2T00051653001:exon,GSBRNA2T00051653001:exon,GSBRNA2T00051653001:exon
chrA01	9370700	9371200	500	hyper	47	1	30	38	97.92	44.12	0.0074688	5	9	GSBRNA2T00051647001:intron
chrA01	9414200	9414700	500	hyper	53	65	0	65	44.92	0	3.4481e-07	9	9	GSBRNA2T00075760001:exon,GSBRNA2T00075760001:exon,GSBRNA2T00075760001:exon
chrA01	9442800	9444400	1600	hyper	51	106	3	300	32.48	0.99	1.3139e-17	18	22	GSBRNA2T00075749001:promoter
chrA01	9442800	9444400	1600	hyper	51	106	3	300	32.48	0.99	1.3139e-17	18	22	GSBRNA2T00075749001:promoter,GSBRNA2T00075750001:exon,GSBRNA2T00075750001:exon,GSBRNA2T00075750001:exon,GSBRNA2T00075750001:exon,GSBRNA2T00075750001:exon
chrA01	9521500	9522000	500	hyper	30	16	0	97	65.22	0	1.0032e-11	5	13	GSBRNA2T00075730001:promoter
chrA01	9521500	9522000	500	hyper	30	16	0	97	65.22	0	1.0032e-11	5	13	GSBRNA2T00075730001:promoter
chrA01	9709800	9710300	500	hyper	110	15	0	51	88	0	4.7132e-10	13	6	GSBRNA2T00021243001:promoter
chrA01	9709800	9710300	500	hyper	110	15	0	51	88	0	4.7132e-10	13	6	GSBRNA2T00021243001:promoter
chrA01	9817000	9817500	500	hyper	10	23	0	45	30.3	0	0.00059015	5	6	GSBRNA2T00021261001:promoter
chrA01	9817000	9817500	500	hyper	10	23	0	45	30.3	0	0.00059015	5	6	GSBRNA2T00021261001:promoter
chrA01	9961900	9962400	500	hyper	174	181	16	121	49.01	11.68	4.9907e-08	21	13	GSBRNA2T00021274001:promoter
chrA01	9961900	9962400	500	hyper	174	181	16	121	49.01	11.68	4.9907e-08	21	13	GSBRNA2T00021274001:promoter,GSBRNA2T00021274001:exon,GSBRNA2T00021274001:exon
chrA01	10004100	10004600	500	hyper	86	42	6	157	67.19	3.68	7.8523e-17	6	8	GSBRNA2T00021280001:promoter
chrA01	10004100	10004600	500	hyper	86	42	6	157	67.19	3.68	7.8523e-17	6	8	GSBRNA2T00021280001:promoter
chrA01	10111600	10112100	500	hyper	34	1	9	44	97.14	16.98	2.3359e-05	5	6	GSBRNA2T00021300001:promoter
chrA01	10111600	10112100	500	hyper	34	1	9	44	97.14	16.98	2.3359e-05	5	6	GSBRNA2T00021300001:promoter
chrA01	10217600	10218100	500	hyper	52	3	12	26	94.55	31.58	0.0034766	8	6	GSBRNA2T00021318001:exon
chrA01	10222400	10222900	500	hyper	37	105	0	64	26.06	0	7.8042e-05	13	9	GSBRNA2T00021318001:exon
chrA01	10255300	10255800	500	hyper	34	51	1	61	40	1.61	1.111e-05	6	7	GSBRNA2T00021323001:promoter
chrA01	10255300	10255800	500	hyper	34	51	1	61	40	1.61	1.111e-05	6	7	GSBRNA2T00021323001:promoter
chrA01	10670200	10670700	500	hyper	79	7	1	38	91.86	2.56	1.3032e-07	9	6	GSBRNA2T00043595001:promoter
chrA01	10670200	10670700	500	hyper	79	7	1	38	91.86	2.56	1.3032e-07	9	6	GSBRNA2T00043595001:promoter
chrA01	10876100	10876600	500	hyper	58	12	6	26	82.86	18.75	0.0010257	7	6	GSBRNA2T00054037001:intron
chrA01	11042500	11043000	500	hyper	58	79	0	75	42.34	0	9.8119e-08	15	7	GSBRNA2T00054074001:exon
chrA01	11276900	11277400	500	hyper	19	41	0	35	31.67	0	0.0014817	9	7	GSBRNA2T00138404001:exon,GSBRNA2T00138404001:exon,GSBRNA2T00138404001:exon
chrA01	11463800	11464300	500	hyper	49	72	13	77	40.5	14.44	0.001954	9	7	GSBRNA2T00138420001:promoter
chrA01	11463800	11464300	500	hyper	49	72	13	77	40.5	14.44	0.001954	9	7	GSBRNA2T00138420001:promoter
chrA01	11617300	11617800	500	hyper	38	106	2	65	26.39	2.99	0.00051124	6	5	GSBRNA2T00138447001:promoter
chrA01	11617300	11617800	500	hyper	38	106	2	65	26.39	2.99	0.00051124	6	5	GSBRNA2T00138447001:promoter
chrA01	11672000	11672500	500	hyper	30	62	0	65	32.61	0	1.2815e-05	7	6	GSBRNA2T00138455001:promoter
chrA01	11672000	11672500	500	hyper	30	62	0	65	32.61	0	1.2815e-05	7	6	GSBRNA2T00138455001:promoter
chrA01	11734600	11735100	500	hyper	81	57	15	88	58.7	14.56	2.4822e-06	14	12	GSBRNA2T00138465001:promoter
chrA01	11734600	11735100	500	hyper	81	57	15	88	58.7	14.56	2.4822e-06	14	12	GSBRNA2T00138465001:promoter
chrA01	11887500	11888500	1000	hyper	120	80	0	96	60	0	1.1356e-12	12	10	GSBRNA2T00138490001:exon,GSBRNA2T00138490001:exon,GSBRNA2T00138490001:exon,GSBRNA2T00138490001:exon
chrA01	12008000	12008500	500	hyper	24	90	1	96	21.05	1.03	5.6519e-05	10	10	GSBRNA2T00138495001:promoter
chrA01	12008000	12008500	500	hyper	24	90	1	96	21.05	1.03	5.6519e-05	10	10	GSBRNA2T00138495001:promoter
chrA01	12244800	12245300	500	hyper	66	16	88	118	80.49	42.72	0.0022633	9	16	GSBRNA2T00138520001:promoter
chrA01	12244800	12245300	500	hyper	66	16	88	118	80.49	42.72	0.0022633	9	16	GSBRNA2T00138520001:promoter,GSBRNA2T00138520001:exon
chrA01	12507300	12507800	500	hyper	57	2	0	35	96.61	0	1.4711e-07	8	5	GSBRNA2T00138557001:exon
chrA01	12538500	12539000	500	hyper	32	43	0	62	42.67	0	1.7306e-06	5	5	GSBRNA2T00138559001:promoter
chrA01	12538500	12539000	500	hyper	32	43	0	62	42.67	0	1.7306e-06	5	5	GSBRNA2T00138559001:promoter
chrA01	12577900	12578400	500	hyper	53	18	4	39	74.65	9.3	2.2425e-05	5	5	GSBRNA2T00138564001:promoter
chrA01	12577900	12578400	500	hyper	53	18	4	39	74.65	9.3	2.2425e-05	5	5	GSBRNA2T00138564001:promoter
chrA01	12883800	12884300	500	hyper	28	21	0	85	57.14	0	9.7829e-10	8	10	GSBRNA2T00138604001:exon
chrA01	12930200	12930700	500	hyper	35	49	0	46	41.67	0	3.4144e-05	9	7	GSBRNA2T00138610001:promoter
chrA01	12930200	12930700	500	hyper	35	49	0	46	41.67	0	3.4144e-05	9	7	GSBRNA2T00138610001:promoter
chrA01	13129400	13130400	1000	hyper	121	150	0	169	44.65	0	3.4787e-16	18	14	GSBRNA2T00138645001:exon
chrA01	13171500	13172000	500	hyper	72	154	0	142	31.86	0	1.5058e-10	13	13	GSBRNA2T00138654001:exon,GSBRNA2T00138654001:exon,GSBRNA2T00138654001:exon
chrA01	13887500	13888000	500	hyper	22	62	1	64	26.19	1.54	0.00031193	7	7	GSBRNA2T00024213001:promoter,GSBRNA2T00024212001:promoter,GSBRNA2T00024210001:promoter
chrA01	13887500	13888000	500	hyper	22	62	1	64	26.19	1.54	0.00031193	7	7	GSBRNA2T00024213001:promoter,GSBRNA2T00024212001:promoter,GSBRNA2T00024210001:promoter,GSBRNA2T00024212001:exon
chrA01	14109300	14109800	500	hyper	66	32	7	56	67.35	11.11	4.8221e-06	7	5	GSBRNA2T00080367001:promoter,GSBRNA2T00080366001:promoter
chrA01	14109300	14109800	500	hyper	66	32	7	56	67.35	11.11	4.8221e-06	7	5	GSBRNA2T00080367001:promoter,GSBRNA2T00080366001:promoter
chrA01	14144700	14145200	500	hyper	43	25	0	33	63.24	0	1.9614e-05	9	5	GSBRNA2T00080359001:exon,GSBRNA2T00080359001:exon,GSBRNA2T00080359001:exon
chrA01	14247600	14248100	500	hyper	369	143	25	250	72.07	9.09	1.8416e-26	34	31	GSBRNA2T00080348001:intron
chrA01	14322000	14322500	500	hyper	36	87	0	73	29.27	0	9.7279e-06	7	6	GSBRNA2T00026789001:exon,GSBRNA2T00026789001:exon,GSBRNA2T00026789001:exon
chrA01	14387300	14388300	1000	hyper	67	166	0	216	28.76	0	9.6434e-14	16	17	GSBRNA2T00026800001:promoter
chrA01	14387300	14388300	1000	hyper	67	166	0	216	28.76	0	9.6434e-14	16	17	GSBRNA2T00026800001:promoter
chrA01	14482700	14484600	1900	hyper	519	118	9	210	81.48	4.11	2.7918e-31	39	21	GSBRNA2T00026812001:promoter
chrA01	14482700	14484600	1900	hyper	519	118	9	210	81.48	4.11	2.7918e-31	39	21	GSBRNA2T00026812001:promoter,GSBRNA2T00026812001:exon,GSBRNA2T00026812001:exon
chrA01	14552100	14553400	1300	hyper	119	76	13	179	61.03	6.77	7.0298e-16	17	13	GSBRNA2T00026820001:promoter
chrA01	14552100	14553400	1300	hyper	119	76	13	179	61.03	6.77	7.0298e-16	17	13	GSBRNA2T00026820001:promoter
chrA01	14970700	14971200	500	hyper	30	7	0	41	81.08	0	4.6134e-07	5	7	GSBRNA2T00087677001:exon,GSBRNA2T00087677001:exon,GSBRNA2T00087677001:exon
chrA01	15097900	15098900	1000	hyper	43	83	4	136	34.13	2.86	2.2092e-08	18	17	GSBRNA2T00092245001:exon,GSBRNA2T00092245001:exon
chrA01	15231900	15232400	500	hyper	22	26	0	37	45.83	0	0.00013024	6	5	GSBRNA2T00086854001:exon,GSBRNA2T00086854001:exon
chrA01	15554100	15554600	500	hyper	33	89	0	74	27.05	0	1.7836e-05	12	7	GSBRNA2T00083401001:promoter
chrA01	15554100	15554600	500	hyper	33	89	0	74	27.05	0	1.7836e-05	12	7	GSBRNA2T00083401001:promoter,GSBRNA2T00083400001:exon,GSBRNA2T00083400001:exon
chrA01	16158300	16158800	500	hyper	24	43	3	63	35.82	4.55	0.00022953	6	6	GSBRNA2T00002627001:intron
chrA01	16296300	16297300	1000	hyper	196	19	0	61	91.16	0	1.748e-12	36	12	GSBRNA2T00002643001:promoter
chrA01	16296300	16297300	1000	hyper	196	19	0	61	91.16	0	1.748e-12	36	12	GSBRNA2T00002643001:promoter,GSBRNA2T00002643001:exon
chrA01	16461200	16462200	1000	hyper	78	63	0	138	55.32	0	2.1839e-15	11	11	GSBRNA2T00058547001:promoter
chrA01	16461200	16462200	1000	hyper	78	63	0	138	55.32	0	2.1839e-15	11	11	GSBRNA2T00058547001:promoter
chrA01	16597900	16598400	500	hyper	50	36	0	86	58.14	0	1.6787e-10	8	8	GSBRNA2T00058528001:promoter,GSBRNA2T00058527001:promoter
chrA01	16597900	16598400	500	hyper	50	36	0	86	58.14	0	1.6787e-10	8	8	GSBRNA2T00058528001:promoter,GSBRNA2T00058527001:promoter
chrA01	16670700	16672100	1400	hyper	66	191	0	126	25.68	0	3.9318e-08	22	16	GSBRNA2T00058518001:promoter
chrA01	16670700	16672100	1400	hyper	66	191	0	126	25.68	0	3.9318e-08	22	16	GSBRNA2T00058518001:promoter
chrA01	16736300	16736800	500	hyper	19	23	0	37	45.24	0	0.00015617	4	4	GSBRNA2T00056213001:promoter
chrA01	16736300	16736800	500	hyper	19	23	0	37	45.24	0	0.00015617	4	4	GSBRNA2T00056213001:promoter
chrA01	16760900	16762400	1500	hyper	102	65	0	134	61.08	0	1.6114e-16	18	17	GSBRNA2T00056217001:promoter
chrA01	16760900	16762400	1500	hyper	102	65	0	134	61.08	0	1.6114e-16	18	17	GSBRNA2T00056217001:promoter,GSBRNA2T00056218001:exon,GSBRNA2T00056218001:exon,GSBRNA2T00056218001:exon,GSBRNA2T00056218001:exon,GSBRNA2T00056218001:exon,GSBRNA2T00056218001:exon,GSBRNA2T00056218001:exon
chrA01	16766400	16766900	500	hyper	76	52	0	37	59.38	0	7.2222e-06	11	5	GSBRNA2T00056219001:exon,GSBRNA2T00056219001:exon
chrA01	16767500	16769500	2000	hyper	186	62	20	191	75	9.48	1.0752e-19	28	20	GSBRNA2T00056219001:promoter
chrA01	16767500	16769500	2000	hyper	186	62	20	191	75	9.48	1.0752e-19	28	20	GSBRNA2T00056219001:promoter,GSBRNA2T00056220001:exon,GSBRNA2T00056220001:exon
chrA01	16795700	16796700	1000	hyper	252	13	62	199	95.09	23.75	7.2444e-18	23	22	GSBRNA2T00056223001:promoter
chrA01	16795700	16796700	1000	hyper	252	13	62	199	95.09	23.75	7.2444e-18	23	22	GSBRNA2T00056223001:promoter
chrA01	17108200	17108700	500	hyper	43	13	31	82	76.79	27.43	0.00026635	5	11	GSBRNA2T00056278001:intron
chrA01	17222200	17222700	500	hyper	39	18	31	86	68.42	26.5	0.00090008	6	10	GSBRNA2T00068015001:exon
chrA01	17254000	17254500	500	hyper	155	41	68	87	79.08	43.87	0.0010596	17	14	GSBRNA2T00068007001:promoter
chrA01	17254000	17254500	500	hyper	155	41	68	87	79.08	43.87	0.0010596	17	14	GSBRNA2T00068007001:promoter,GSBRNA2T00068007001:exon,GSBRNA2T00068007001:exon
chrA01	17396400	17398300	1900	hyper	201	34	23	215	85.53	9.66	1.9345e-24	18	17	GSBRNA2T00067996001:promoter
chrA01	17396400	17398300	1900	hyper	201	34	23	215	85.53	9.66	1.9345e-24	18	17	GSBRNA2T00067996001:promoter
chrA01	17678200	17678700	500	hyper	73	15	6	28	82.95	17.65	0.0004376	11	5	GSBRNA2T00063827001:exon
chrA01	17679900	17680400	500	hyper	154	14	24	99	91.67	19.51	6.9793e-11	10	9	GSBRNA2T00063828001:promoter
chrA01	17679900	17680400	500	hyper	154	14	24	99	91.67	19.51	6.9793e-11	10	9	GSBRNA2T00063828001:promoter
chrA01	17816200	17816700	500	hyper	43	41	0	67	51.19	0	6.7158e-08	5	8	GSBRNA2T00011075001:promoter
chrA01	17816200	17816700	500	hyper	43	41	0	67	51.19	0	6.7158e-08	5	8	GSBRNA2T00011075001:promoter
chrA01	17819500	17820000	500	hyper	39	36	0	71	52	0	2.8934e-08	7	6	GSBRNA2T00011076001:promoter
chrA01	17819500	17820000	500	hyper	39	36	0	71	52	0	2.8934e-08	7	6	GSBRNA2T00011076001:promoter,GSBRNA2T00011076001:exon
chrA01	17875400	17875900	500	hyper	20	39	0	32	33.9	0	0.0016692	10	5	GSBRNA2T00074450001:promoter
chrA01	17875400	17875900	500	hyper	20	39	0	32	33.9	0	0.0016692	10	5	GSBRNA2T00074450001:promoter,GSBRNA2T00074450001:exon,GSBRNA2T00074450001:exon
chrA01	17888200	17889200	1000	hyper	206	13	31	94	94.06	24.8	5.0868e-10	20	14	GSBRNA2T00074447001:promoter,GSBRNA2T00074446001:promoter
chrA01	17888200	17889200	1000	hyper	206	13	31	94	94.06	24.8	5.0868e-10	20	14	GSBRNA2T00074447001:promoter,GSBRNA2T00074446001:promoter
chrA01	18019300	18019800	500	hyper	21	10	8	41	67.74	16.33	0.0018745	5	8	GSBRNA2T00074428001:exon
chrA01	18071100	18071600	500	hyper	27	21	0	41	56.25	0	1.1541e-05	5	6	GSBRNA2T00074415001:exon,GSBRNA2T00074415001:exon,GSBRNA2T00074415001:exon
chrA01	18336600	18337100	500	hyper	55	42	0	80	56.7	0	7.2868e-10	9	8	GSBRNA2T00005610001:promoter
chrA01	18336600	18337100	500	hyper	55	42	0	80	56.7	0	7.2868e-10	9	8	GSBRNA2T00005610001:promoter,GSBRNA2T00005610001:exon,GSBRNA2T00005610001:exon
chrA01	18669700	18670200	500	hyper	14	43	0	46	24.56	0	0.0013279	7	6	GSBRNA2T00005553001:exon
chrA01	18856800	18857300	500	hyper	61	6	2	30	91.04	6.25	8.9379e-06	9	5	GSBRNA2T00005517001:promoter
chrA01	18856800	18857300	500	hyper	61	6	2	30	91.04	6.25	8.9379e-06	9	5	GSBRNA2T00005517001:promoter
chrA01	18863800	18864300	500	hyper	39	15	0	73	72.22	0	2.5219e-10	9	7	GSBRNA2T00005514001:promoter,GSBRNA2T00005515001:promoter,GSBRNA2T00005516001:promoter
chrA01	18863800	18864300	500	hyper	39	15	0	73	72.22	0	2.5219e-10	9	7	GSBRNA2T00005514001:promoter,GSBRNA2T00005515001:promoter,GSBRNA2T00005516001:promoter,GSBRNA2T00005514001:exon,GSBRNA2T00005514001:exon
chrA01	18904500	18905000	500	hyper	65	6	0	78	91.55	0	2.5309e-13	10	6	GSBRNA2T00005503001:intron
chrA01	19061600	19062100	500	hyper	22	27	4	51	44.9	7.27	0.00059213	7	8	GSBRNA2T00057603001:exon,GSBRNA2T00057603001:exon,GSBRNA2T00057603001:exon
chrA01	19124600	19125100	500	hyper	65	16	0	47	80.25	0	1.9432e-08	6	6	GSBRNA2T00057592001:promoter
chrA01	19124600	19125100	500	hyper	65	16	0	47	80.25	0	1.9432e-08	6	6	GSBRNA2T00057592001:promoter,GSBRNA2T00057592001:exon
chrA01	19152000	19152500	500	hyper	57	1	0	33	98.28	0	2.5001e-07	6	6	GSBRNA2T00057587001:promoter
chrA01	19152000	19152500	500	hyper	57	1	0	33	98.28	0	2.5001e-07	6	6	GSBRNA2T00057587001:promoter,GSBRNA2T00057587001:exon
chrA01	19281900	19282400	500	hyper	66	5	0	72	92.96	0	1.0789e-12	8	9	GSBRNA2T00057561001:promoter
chrA01	19281900	19282400	500	hyper	66	5	0	72	92.96	0	1.0789e-12	8	9	GSBRNA2T00057561001:promoter
chrA01	19301900	19302400	500	hyper	49	13	0	52	79.03	0	1.0102e-08	8	5	GSBRNA2T00057558001:promoter
chrA01	19301900	19302400	500	hyper	49	13	0	52	79.03	0	1.0102e-08	8	5	GSBRNA2T00057558001:promoter
chrA01	19308500	19309000	500	hyper	49	16	2	46	75.38	4.17	6.8762e-07	9	5	GSBRNA2T00057557001:promoter
chrA01	19308500	19309000	500	hyper	49	16	2	46	75.38	4.17	6.8762e-07	9	5	GSBRNA2T00057557001:promoter,GSBRNA2T00057557001:exon
chrA01	19353500	19354000	500	hyper	55	10	6	33	84.62	15.38	0.00011735	6	5	GSBRNA2T00057546001:promoter
chrA01	19353500	19354000	500	hyper	55	10	6	33	84.62	15.38	0.00011735	6	5	GSBRNA2T00057546001:promoter,GSBRNA2T00057546001:exon
chrA01	19373800	19374300	500	hyper	66	4	13	64	94.29	16.88	1.4358e-07	5	5	GSBRNA2T00057542001:promoter
chrA01	19373800	19374300	500	hyper	66	4	13	64	94.29	16.88	1.4358e-07	5	5	GSBRNA2T00057542001:promoter
chrA01	19474700	19475200	500	hyper	52	5	0	49	91.23	0	3.5727e-09	5	5	GSBRNA2T00086358001:promoter
chrA01	19474700	19475200	500	hyper	52	5	0	49	91.23	0	3.5727e-09	5	5	GSBRNA2T00086358001:promoter
chrA01	19525900	19526400	500	hyper	87	6	28	41	93.55	40.58	0.001709	6	6	GSBRNA2T00086367001:promoter
chrA01	19525900	19526400	500	hyper	87	6	28	41	93.55	40.58	0.001709	6	6	GSBRNA2T00086367001:promoter
chrA01	19597600	19598100	500	hyper	21	70	1	109	23.08	0.91	7.8512e-06	9	8	GSBRNA2T00010070001:exon,GSBRNA2T00010070001:exon
chrA01	19720300	19720800	500	hyper	54	7	11	25	88.52	30.56	0.0055112	6	5	GSBRNA2T00010045001:exon,GSBRNA2T00010045001:exon
chrA01	19741400	19741900	500	hyper	37	40	0	37	48.05	0	6.6555e-05	7	5	GSBRNA2T00010038001:exon,GSBRNA2T00010038001:exon
chrA01	19833200	19833700	500	hyper	159	7	0	60	95.78	0	1.5332e-12	15	8	GSBRNA2T00010025001:promoter
chrA01	19833200	19833700	500	hyper	159	7	0	60	95.78	0	1.5332e-12	15	8	GSBRNA2T00010025001:promoter,GSBRNA2T00010025001:exon
chrA01	19886100	19886600	500	hyper	131	125	24	151	51.17	13.71	1.4837e-08	15	13	GSBRNA2T00010006001:promoter
chrA01	19886100	19886600	500	hyper	131	125	24	151	51.17	13.71	1.4837e-08	15	13	GSBRNA2T00010006001:promoter,GSBRNA2T00010007001:exon
chrA01	19913100	19913600	500	hyper	44	22	21	51	66.67	29.17	0.0080382	10	13	GSBRNA2T00010001001:promoter,GSBRNA2T00009999001:promoter
chrA01	19913100	19913600	500	hyper	44	22	21	51	66.67	29.17	0.0080382	10	13	GSBRNA2T00010001001:promoter,GSBRNA2T00009999001:promoter
chrA01	19937800	19938300	500	hyper	88	11	3	87	88.89	3.33	1.6374e-13	12	7	GSBRNA2T00009995001:promoter
chrA01	19937800	19938300	500	hyper	88	11	3	87	88.89	3.33	1.6374e-13	12	7	GSBRNA2T00009995001:promoter
chrA01	19963800	19964300	500	hyper	33	31	0	70	51.56	0	5.0979e-08	6	9	GSBRNA2T00009986001:promoter
chrA01	19963800	19964300	500	hyper	33	31	0	70	51.56	0	5.0979e-08	6	9	GSBRNA2T00009986001:promoter,GSBRNA2T00009985001:exon
chrA01	20021400	20021900	500	hyper	127	53	0	100	70.56	0	8.8729e-15	8	8	GSBRNA2T00009971001:promoter
chrA01	20021400	20021900	500	hyper	127	53	0	100	70.56	0	8.8729e-15	8	8	GSBRNA2T00009971001:promoter
chrA01	20103400	20103900	500	hyper	54	20	0	38	72.97	0	1.0909e-06	8	5	GSBRNA2T00009958001:promoter
chrA01	20103400	20103900	500	hyper	54	20	0	38	72.97	0	1.0909e-06	8	5	GSBRNA2T00009958001:promoter
chrA01	20116400	20116900	500	hyper	51	43	0	32	54.26	0	7e-05	10	5	GSBRNA2T00009954001:promoter
chrA01	20116400	20116900	500	hyper	51	43	0	32	54.26	0	7e-05	10	5	GSBRNA2T00009954001:promoter,GSBRNA2T00009954001:exon
chrA01	20180900	20181400	500	hyper	32	36	0	41	47.06	0	3.794e-05	8	7	GSBRNA2T00009935001:exon,GSBRNA2T00009935001:exon
chrA01	20656400	20656900	500	hyper	57	5	28	47	91.94	37.33	0.0015429	7	12	GSBRNA2T00076429001:promoter
chrA01	20656400	20656900	500	hyper	57	5	28	47	91.94	37.33	0.0015429	7	12	GSBRNA2T00076429001:promoter,GSBRNA2T00076429001:exon
chrA01	20679600	20680100	500	hyper	26	56	2	63	31.71	3.08	0.00021643	10	6	GSBRNA2T00076437001:promoter
chrA01	20679600	20680100	500	hyper	26	56	2	63	31.71	3.08	0.00021643	10	6	GSBRNA2T00076437001:promoter,GSBRNA2T00076437001:exon,GSBRNA2T00076437001:exon,GSBRNA2T00076437001:exon
chrA01	20680200	20680700	500	hyper	60	11	0	30	84.51	0	2.8677e-06	10	6	GSBRNA2T00076438001:promoter
chrA01	20680200	20680700	500	hyper	60	11	0	30	84.51	0	2.8677e-06	10	6	GSBRNA2T00076438001:promoter,GSBRNA2T00076437001:exon
chrA01	20809900	20810400	500	hyper	88	6	15	50	93.62	23.08	6.2476e-06	9	9	GSBRNA2T00076469001:promoter,GSBRNA2T00076468001:promoter
chrA01	20809900	20810400	500	hyper	88	6	15	50	93.62	23.08	6.2476e-06	9	9	GSBRNA2T00076469001:promoter,GSBRNA2T00076468001:promoter
chrA01	20980600	20981600	1000	hyper	192	15	68	80	92.75	45.95	6.6846e-05	11	14	GSBRNA2T00096980001:promoter
chrA01	20980600	20981600	1000	hyper	192	15	68	80	92.75	45.95	6.6846e-05	11	14	GSBRNA2T00096980001:promoter
chrA01	20993800	20994300	500	hyper	69	12	17	35	85.19	32.69	0.0026365	6	5	GSBRNA2T00096986001:promoter
chrA01	20993800	20994300	500	hyper	69	12	17	35	85.19	32.69	0.0026365	6	5	GSBRNA2T00096986001:promoter
chrA01	21106100	21106600	500	hyper	46	3	13	51	93.88	20.31	1.4742e-05	5	5	GSBRNA2T00060295001:promoter
chrA01	21106100	21106600	500	hyper	46	3	13	51	93.88	20.31	1.4742e-05	5	5	GSBRNA2T00060295001:promoter
chrA01	21253800	21254300	500	hyper	40	13	5	37	75.47	11.9	0.00010745	5	5	GSBRNA2T00060264001:exon,GSBRNA2T00060264001:exon,GSBRNA2T00060264001:exon
chrA01	21404600	21405100	500	hyper	39	13	11	64	75	14.67	8.9665e-06	5	7	GSBRNA2T00060235001:exon
chrA01	21418200	21418700	500	hyper	219	76	0	51	74.24	0	2.5725e-09	10	6	GSBRNA2T00060230001:promoter,GSBRNA2T00060231001:promoter
chrA01	21418200	21418700	500	hyper	219	76	0	51	74.24	0	2.5725e-09	10	6	GSBRNA2T00060230001:promoter,GSBRNA2T00060231001:promoter
chrA01	21498500	21499000	500	hyper	89	4	25	37	95.7	40.32	0.001743	6	5	GSBRNA2T00072911001:promoter
chrA01	21498500	21499000	500	hyper	89	4	25	37	95.7	40.32	0.001743	6	5	GSBRNA2T00072911001:promoter
chrA01	21500400	21500900	500	hyper	17	20	1	36	45.95	2.7	0.00059345	6	5	GSBRNA2T00072910001:promoter,GSBRNA2T00072909001:promoter
chrA01	21500400	21500900	500	hyper	17	20	1	36	45.95	2.7	0.00059345	6	5	GSBRNA2T00072910001:promoter,GSBRNA2T00072909001:promoter,GSBRNA2T00072909001:exon,GSBRNA2T00072909001:exon,GSBRNA2T00072910001:exon
chrA01	21559600	21560100	500	hyper	14	42	0	163	25	0	3.878e-09	7	20	GSBRNA2T00072890001:promoter
chrA01	21559600	21560100	500	hyper	14	42	0	163	25	0	3.878e-09	7	20	GSBRNA2T00072890001:promoter,GSBRNA2T00072890001:exon,GSBRNA2T00072890001:exon
chrA01	21572700	21573200	500	hyper	43	13	12	43	76.79	21.82	0.00060853	6	9	GSBRNA2T00072886001:exon
chrA01	21608800	21609300	500	hyper	96	22	2	48	81.36	4	3.8123e-08	12	8	GSBRNA2T00072876001:promoter,GSBRNA2T00072874001:promoter
chrA01	21608800	21609300	500	hyper	96	22	2	48	81.36	4	3.8123e-08	12	8	GSBRNA2T00072876001:promoter,GSBRNA2T00072874001:promoter
chrA01	21652100	21653100	1000	hyper	282	49	219	151	85.2	59.19	0.0019283	32	35	GSBRNA2T00072865001:promoter
chrA01	21652100	21653100	1000	hyper	282	49	219	151	85.2	59.19	0.0019283	32	35	GSBRNA2T00072865001:promoter
chrA01	21653100	21654100	1000	hyper	141	34	5	236	80.57	2.07	3.2482e-30	17	16	GSBRNA2T00072865001:promoter
chrA01	21653100	21654100	1000	hyper	141	34	5	236	80.57	2.07	3.2482e-30	17	16	GSBRNA2T00072865001:promoter,GSBRNA2T00072865001:exon
chrA01	21654100	21654600	500	hyper	42	20	19	67	67.74	22.09	0.00039419	7	6	GSBRNA2T00072865001:exon
chrA01	21774900	21775400	500	hyper	65	0	11	19	100	36.67	0.0092317	10	6	GSBRNA2T00024976001:promoter
chrA01	21774900	21775400	500	hyper	65	0	11	19	100	36.67	0.0092317	10	6	GSBRNA2T00024976001:promoter
chrA01	21864800	21865300	500	hyper	29	10	8	59	74.36	11.94	1.2949e-05	5	9	GSBRNA2T00057488001:exon,GSBRNA2T00057488001:exon
chrA01	22169200	22169700	500	hyper	114	50	2	64	69.51	3.03	2.5196e-09	14	5	GSBRNA2T00057535001:exon
chrA01	22352000	22352500	500	hyper	33	33	11	65	50	14.47	0.00092314	9	9	GSBRNA2T00057250001:exon,GSBRNA2T00057250001:exon,GSBRNA2T00057250001:exon
chrA01	22564000	22564500	500	hyper	90	34	20	56	72.58	26.32	0.00030516	6	6	GSBRNA2T00057215001:promoter
chrA01	22564000	22564500	500	hyper	90	34	20	56	72.58	26.32	0.00030516	6	6	GSBRNA2T00057215001:promoter
chrA01	22583900	22584400	500	hyper	72	9	1	42	88.89	2.33	5.928e-08	12	5	GSBRNA2T00057210001:promoter,GSBRNA2T00057208001:promoter
chrA01	22583900	22584400	500	hyper	72	9	1	42	88.89	2.33	5.928e-08	12	5	GSBRNA2T00057210001:promoter,GSBRNA2T00057208001:promoter,GSBRNA2T00057208001:exon,GSBRNA2T00057208001:exon
chrA01	22628200	22628700	500	hyper	36	18	0	29	66.67	0	4.5395e-05	9	5	GSBRNA2T00015287001:promoter
chrA01	22628200	22628700	500	hyper	36	18	0	29	66.67	0	4.5395e-05	9	5	GSBRNA2T00015287001:promoter
chrA01	22647600	22648100	500	hyper	51	43	0	100	54.26	0	2.6513e-11	8	7	GSBRNA2T00015294001:promoter,GSBRNA2T00015295001:promoter,GSBRNA2T00015293001:promoter
chrA01	22647600	22648100	500	hyper	51	43	0	100	54.26	0	2.6513e-11	8	7	GSBRNA2T00015294001:promoter,GSBRNA2T00015295001:promoter,GSBRNA2T00015293001:promoter,GSBRNA2T00015295001:exon
chrA01	22785400	22785900	500	hyper	18	43	0	133	29.51	0	8.6844e-09	5	6	GSBRNA2T00015323001:promoter,GSBRNA2T00015322001:promoter
chrA01	22785400	22785900	500	hyper	18	43	0	133	29.51	0	8.6844e-09	5	6	GSBRNA2T00015323001:promoter,GSBRNA2T00015322001:promoter
chrA01	22941200	22941700	500	hyper	44	12	12	43	78.57	21.82	0.00046471	6	7	GSBRNA2T00015346001:promoter
chrA01	22941200	22941700	500	hyper	44	12	12	43	78.57	21.82	0.00046471	6	7	GSBRNA2T00015346001:promoter
chrA01_random	280600	281100	500	hyper	92	17	32	53	84.4	37.65	0.0011627	6	6	GSBRNA2T00052184001:promoter
chrA01_random	280600	281100	500	hyper	92	17	32	53	84.4	37.65	0.0011627	6	6	GSBRNA2T00052184001:promoter
chrA01_random	534000	534500	500	hyper	43	27	0	58	61.43	0	5.6345e-08	7	6	GSBRNA2T00086179001:promoter
chrA01_random	534000	534500	500	hyper	43	27	0	58	61.43	0	5.6345e-08	7	6	GSBRNA2T00086179001:promoter
chrA01_random	668100	668600	500	hyper	34	45	11	69	43.04	13.75	0.002055	7	9	GSBRNA2T00083884001:promoter
chrA01_random	668100	668600	500	hyper	34	45	11	69	43.04	13.75	0.002055	7	9	GSBRNA2T00083884001:promoter
chrA01_random	727200	727700	500	hyper	167	18	28	102	90.27	21.54	1.6936e-10	11	11	GSBRNA2T00092959001:promoter
chrA01_random	727200	727700	500	hyper	167	18	28	102	90.27	21.54	1.6936e-10	11	11	GSBRNA2T00092959001:promoter
chrA01_random	846000	846500	500	hyper	58	3	9	27	95.08	25	0.00083521	10	6	GSBRNA2T00092973001:promoter
chrA01_random	846000	846500	500	hyper	58	3	9	27	95.08	25	0.00083521	10	6	GSBRNA2T00092973001:promoter
chrA01_random	850200	851200	1000	hyper	302	57	2	134	84.12	1.47	2.1174e-22	25	14	GSBRNA2T00039533001:promoter
chrA01_random	850200	851200	1000	hyper	302	57	2	134	84.12	1.47	2.1174e-22	25	14	GSBRNA2T00039533001:promoter
chrA01_random	937500	938000	500	hyper	94	29	7	45	76.42	13.46	8.6939e-06	7	7	GSBRNA2T00096505001:promoter
chrA01_random	937500	938000	500	hyper	94	29	7	45	76.42	13.46	8.6939e-06	7	7	GSBRNA2T00096505001:promoter
chrA01_random	1092800	1093300	500	hyper	65	17	15	49	79.27	23.44	0.00015554	7	7	GSBRNA2T00084004001:promoter
chrA01_random	1092800	1093300	500	hyper	65	17	15	49	79.27	23.44	0.00015554	7	7	GSBRNA2T00084004001:promoter
chrA01_random	1346600	1347100	500	hyper	47	91	3	60	34.06	4.76	0.00026978	10	8	GSBRNA2T00060643001:promoter,GSBRNA2T00060644001:promoter
chrA01_random	1346600	1347100	500	hyper	47	91	3	60	34.06	4.76	0.00026978	10	8	GSBRNA2T00060643001:promoter,GSBRNA2T00060644001:promoter
chrA01_random	1348700	1349200	500	hyper	122	84	17	168	59.22	9.19	2.5672e-13	8	8	GSBRNA2T00060644001:intron
chrA01_random	1491100	1491600	500	hyper	71	26	4	34	73.2	10.53	7.4808e-05	9	5	GSBRNA2T00020083001:promoter
chrA01_random	1491100	1491600	500	hyper	71	26	4	34	73.2	10.53	7.4808e-05	9	5	GSBRNA2T00020083001:promoter,GSBRNA2T00020083001:exon
chrA01_random	1499300	1499800	500	hyper	14	17	0	76	45.16	0	2.3298e-07	6	10	GSBRNA2T00020084001:promoter
chrA01_random	1499300	1499800	500	hyper	14	17	0	76	45.16	0	2.3298e-07	6	10	GSBRNA2T00020084001:promoter
chrA01_random	1529800	1530300	500	hyper	85	51	5	71	62.5	6.58	5.4781e-08	12	8	GSBRNA2T00007161001:exon
chrA01_random	2076500	2077000	500	hyper	62	78	0	129	44.29	0	2.9527e-12	9	8	GSBRNA2T00017161001:promoter
chrA01_random	2076500	2077000	500	hyper	62	78	0	129	44.29	0	2.9527e-12	9	8	GSBRNA2T00017161001:promoter,GSBRNA2T00017161001:exon
chrA01_random	2268200	2268700	500	hyper	36	15	0	40	70.59	0	1.5382e-06	6	6	GSBRNA2T00022855001:promoter
chrA01_random	2268200	2268700	500	hyper	36	15	0	40	70.59	0	1.5382e-06	6	6	GSBRNA2T00022855001:promoter
chrA01_random	2404900	2405400	500	hyper	31	53	0	49	36.9	0	5.4424e-05	8	8	GSBRNA2T00037861001:exon,GSBRNA2T00037861001:exon
chrA01_random	2462700	2463200	500	hyper	63	9	4	54	87.5	6.9	3.1446e-08	5	5	GSBRNA2T00029974001:promoter
chrA01_random	2462700	2463200	500	hyper	63	9	4	54	87.5	6.9	3.1446e-08	5	5	GSBRNA2T00029974001:promoter
chrA01_random	2590200	2590700	500	hyper	38	29	0	102	56.72	0	1.7659e-11	8	11	GSBRNA2T00030093001:promoter
chrA01_random	2590200	2590700	500	hyper	38	29	0	102	56.72	0	1.7659e-11	8	11	GSBRNA2T00030093001:promoter,GSBRNA2T00030094001:exon,GSBRNA2T00030094001:exon,GSBRNA2T00030094001:exon
chrA01_random	2600100	2600600	500	hyper	68	20	20	92	77.27	17.86	1.7868e-07	7	7	GSBRNA2T00030096001:intron
chrA02	107300	107800	500	hyper	40	9	0	31	81.63	0	4.8418e-06	7	6	GSBRNA2T00143542001:promoter
chrA02	107300	107800	500	hyper	40	9	0	31	81.63	0	4.8418e-06	7	6	GSBRNA2T00143542001:promoter,GSBRNA2T00143543001:exon,GSBRNA2T00143543001:exon
chrA02	126700	127200	500	hyper	28	27	0	33	50.91	0	0.00012775	7	5	GSBRNA2T00143539001:promoter
chrA02	126700	127200	500	hyper	28	27	0	33	50.91	0	0.00012775	7	5	GSBRNA2T00143539001:promoter,GSBRNA2T00143538001:exon,GSBRNA2T00143538001:exon
chrA02	216700	217200	500	hyper	46	69	0	29	40	0	0.0009449	9	5	GSBRNA2T00143511001:exon,GSBRNA2T00143511001:exon,GSBRNA2T00143511001:exon
chrA02	236000	236500	500	hyper	26	38	0	50	40.62	0	2.5341e-05	7	5	GSBRNA2T00143505001:exon,GSBRNA2T00143505001:exon
chrA02	318800	319800	1000	hyper	145	32	16	67	81.92	19.28	2.3507e-07	19	10	GSBRNA2T00143479001:promoter
chrA02	318800	319800	1000	hyper	145	32	16	67	81.92	19.28	2.3507e-07	19	10	GSBRNA2T00143479001:promoter
chrA02	837700	838200	500	hyper	32	19	0	33	62.75	0	2.7697e-05	6	5	GSBRNA2T00143359001:intron
chrA02	846800	847300	500	hyper	12	28	0	55	30	0	0.00015623	5	6	GSBRNA2T00143356001:promoter
chrA02	846800	847300	500	hyper	12	28	0	55	30	0	0.00015623	5	6	GSBRNA2T00143356001:promoter,GSBRNA2T00143357001:exon,GSBRNA2T00143357001:exon
chrA02	937200	938200	1000	hyper	131	43	0	130	75.29	0	3.9444e-19	18	18	GSBRNA2T00143324001:promoter
chrA02	937200	938200	1000	hyper	131	43	0	130	75.29	0	3.9444e-19	18	18	GSBRNA2T00143324001:promoter,GSBRNA2T00143324001:exon
chrA02	1012800	1013300	500	hyper	27	53	0	92	33.75	0	2.1883e-07	7	7	GSBRNA2T00143304001:exon
chrA02	1066000	1066500	500	hyper	34	47	0	34	41.98	0	0.0003075	8	6	GSBRNA2T00143291001:promoter
chrA02	1066000	1066500	500	hyper	34	47	0	34	41.98	0	0.0003075	8	6	GSBRNA2T00143291001:promoter,GSBRNA2T00143292001:exon
chrA02	1185100	1185600	500	hyper	21	16	0	39	56.76	0	2.1831e-05	7	5	GSBRNA2T00143263001:exon,GSBRNA2T00143263001:exon,GSBRNA2T00143263001:exon
chrA02	1332800	1333300	500	hyper	21	16	0	58	56.76	0	4.1097e-07	5	8	GSBRNA2T00143218001:promoter
chrA02	1332800	1333300	500	hyper	21	16	0	58	56.76	0	4.1097e-07	5	8	GSBRNA2T00143218001:promoter,GSBRNA2T00143219001:exon
chrA02	1356400	1356900	500	hyper	98	11	0	320	89.91	0	2.2515e-42	5	7	GSBRNA2T00143211001:promoter
chrA02	1356400	1356900	500	hyper	98	11	0	320	89.91	0	2.2515e-42	5	7	GSBRNA2T00143211001:promoter
chrA02	1425200	1425700	500	hyper	42	8	2	50	84	3.85	9.6699e-08	6	8	GSBRNA2T00143192001:promoter
chrA02	1425200	1425700	500	hyper	42	8	2	50	84	3.85	9.6699e-08	6	8	GSBRNA2T00143192001:promoter,GSBRNA2T00143193001:exon,GSBRNA2T00143193001:exon
chrA02	1496200	1496700	500	hyper	69	79	0	82	46.62	0	5.8143e-09	11	10	GSBRNA2T00143175001:exon,GSBRNA2T00143175001:exon,GSBRNA2T00143175001:exon
chrA02	1559200	1559700	500	hyper	67	111	0	43	37.64	0	9.055e-05	14	7	GSBRNA2T00143159001:exon,GSBRNA2T00143159001:exon
chrA02	1703600	1704100	500	hyper	22	7	0	35	75.86	0	6.6617e-06	5	6	GSBRNA2T00143134001:promoter
chrA02	1703600	1704100	500	hyper	22	7	0	35	75.86	0	6.6617e-06	5	6	GSBRNA2T00143134001:promoter,GSBRNA2T00143135001:exon
chrA02	1747900	1748400	500	hyper	60	64	0	69	48.39	0	5.6066e-08	7	7	GSBRNA2T00143124001:promoter
chrA02	1747900	1748400	500	hyper	60	64	0	69	48.39	0	5.6066e-08	7	7	GSBRNA2T00143124001:promoter
chrA02	1843800	1844300	500	hyper	130	62	117	268	67.71	30.39	1.8166e-07	7	7	GSBRNA2T00010268001:promoter
chrA02	1843800	1844300	500	hyper	130	62	117	268	67.71	30.39	1.8166e-07	7	7	GSBRNA2T00010268001:promoter
chrA02	1845500	1848300	2800	hyper	298	84	97	481	78.01	16.78	8.4412e-33	35	44	GSBRNA2T00010265001:promoter
chrA02	1845500	1848300	2800	hyper	298	84	97	481	78.01	16.78	8.4412e-33	35	44	GSBRNA2T00010265001:promoter,GSBRNA2T00010266001:exon,GSBRNA2T00010266001:exon,GSBRNA2T00010266001:exon,GSBRNA2T00010266001:exon
chrA02	2280500	2281000	500	hyper	88	21	25	76	80.73	24.75	5.0237e-06	5	5	GSBRNA2T00081338001:promoter
chrA02	2280500	2281000	500	hyper	88	21	25	76	80.73	24.75	5.0237e-06	5	5	GSBRNA2T00081338001:promoter
chrA02	2319000	2320000	1000	hyper	180	14	87	82	92.78	51.48	0.00041794	19	20	GSBRNA2T00001302001:promoter
chrA02	2319000	2320000	1000	hyper	180	14	87	82	92.78	51.48	0.00041794	19	20	GSBRNA2T00001302001:promoter
chrA02	2487600	2488100	500	hyper	52	39	0	31	57.14	0	6.0802e-05	11	5	GSBRNA2T00001338001:exon,GSBRNA2T00001338001:exon,GSBRNA2T00001338001:exon
chrA02	2673300	2673800	500	hyper	57	6	6	51	90.48	10.53	2.7868e-07	6	6	GSBRNA2T00001384001:promoter
chrA02	2673300	2673800	500	hyper	57	6	6	51	90.48	10.53	2.7868e-07	6	6	GSBRNA2T00001384001:promoter
chrA02	2736900	2737400	500	hyper	57	21	0	83	73.08	0	5.6382e-12	5	5	GSBRNA2T00001400001:promoter
chrA02	2736900	2737400	500	hyper	57	21	0	83	73.08	0	5.6382e-12	5	5	GSBRNA2T00001400001:promoter
chrA02	2745800	2746300	500	hyper	71	23	17	55	75.53	23.61	0.00013145	11	8	GSBRNA2T00001402001:promoter
chrA02	2745800	2746300	500	hyper	71	23	17	55	75.53	23.61	0.00013145	11	8	GSBRNA2T00001402001:promoter
chrA02	2768800	2769300	500	hyper	50	49	2	58	50.51	3.33	3.2062e-06	15	7	GSBRNA2T00001406001:promoter
chrA02	2768800	2769300	500	hyper	50	49	2	58	50.51	3.33	3.2062e-06	15	7	GSBRNA2T00001406001:promoter,GSBRNA2T00001406001:exon
chrA02	2791100	2791600	500	hyper	26	20	0	100	56.52	0	6.9186e-11	6	9	GSBRNA2T00001410001:promoter
chrA02	2791100	2791600	500	hyper	26	20	0	100	56.52	0	6.9186e-11	6	9	GSBRNA2T00001410001:promoter
chrA02	3002300	3003300	1000	hyper	144	24	7	299	85.71	2.29	1.1918e-37	13	13	GSBRNA2T00001443001:promoter,GSBRNA2T00001444001:promoter
chrA02	3002300	3003300	1000	hyper	144	24	7	299	85.71	2.29	1.1918e-37	13	13	GSBRNA2T00001443001:promoter,GSBRNA2T00001444001:promoter,GSBRNA2T00001444001:exon,GSBRNA2T00001444001:exon
chrA02	3024900	3025400	500	hyper	68	11	35	58	86.08	37.63	0.0012268	6	7	GSBRNA2T00001451001:promoter
chrA02	3024900	3025400	500	hyper	68	11	35	58	86.08	37.63	0.0012268	6	7	GSBRNA2T00001451001:promoter
chrA02	3033300	3033800	500	hyper	126	26	5	79	82.89	5.95	1.0122e-11	12	5	GSBRNA2T00001454001:promoter,GSBRNA2T00001455001:promoter
chrA02	3033300	3033800	500	hyper	126	26	5	79	82.89	5.95	1.0122e-11	12	5	GSBRNA2T00001454001:promoter,GSBRNA2T00001455001:promoter
chrA02	3039900	3040400	500	hyper	32	51	0	128	38.55	0	1.5075e-10	6	11	GSBRNA2T00001457001:exon
chrA02	3804500	3805000	500	hyper	52	57	0	32	47.71	0	0.00016906	13	5	GSBRNA2T00052800001:promoter,GSBRNA2T00052796001:promoter,GSBRNA2T00052797001:promoter
chrA02	3804500	3805000	500	hyper	52	57	0	32	47.71	0	0.00016906	13	5	GSBRNA2T00052800001:promoter,GSBRNA2T00052796001:promoter,GSBRNA2T00052797001:promoter
chrA02	3840100	3840600	500	hyper	206	65	9	28	76.01	24.32	0.0018736	14	7	GSBRNA2T00088559001:promoter
chrA02	3840100	3840600	500	hyper	206	65	9	28	76.01	24.32	0.0018736	14	7	GSBRNA2T00088559001:promoter
chrA02	3913600	3914100	500	hyper	130	12	48	75	91.55	39.02	3.7502e-05	8	8	GSBRNA2T00088542001:promoter
chrA02	3913600	3914100	500	hyper	130	12	48	75	91.55	39.02	3.7502e-05	8	8	GSBRNA2T00088542001:promoter
chrA02	4064400	4065400	1000	hyper	173	35	13	68	83.17	16.05	1.938e-08	15	10	GSBRNA2T00012898001:promoter
chrA02	4064400	4065400	1000	hyper	173	35	13	68	83.17	16.05	1.938e-08	15	10	GSBRNA2T00012898001:promoter
chrA02	4690200	4691200	1000	hyper	95	91	0	122	51.08	0	2.0384e-13	16	14	GSBRNA2T00041394001:promoter
chrA02	4690200	4691200	1000	hyper	95	91	0	122	51.08	0	2.0384e-13	16	14	GSBRNA2T00041394001:promoter
chrA02	4853100	4853600	500	hyper	62	25	7	40	71.26	14.89	0.00014032	10	7	GSBRNA2T00041423001:promoter
chrA02	4853100	4853600	500	hyper	62	25	7	40	71.26	14.89	0.00014032	10	7	GSBRNA2T00041423001:promoter
chrA02	4921500	4922000	500	hyper	310	14	54	56	95.68	49.09	0.00025246	14	8	GSBRNA2T00041440001:promoter
chrA02	4921500	4922000	500	hyper	310	14	54	56	95.68	49.09	0.00025246	14	8	GSBRNA2T00041440001:promoter
chrA02	5022400	5022900	500	hyper	48	42	0	68	53.33	0	2.8054e-08	7	5	GSBRNA2T00041461001:promoter
chrA02	5022400	5022900	500	hyper	48	42	0	68	53.33	0	2.8054e-08	7	5	GSBRNA2T00041461001:promoter,GSBRNA2T00041460001:exon
chrA02	5057500	5058000	500	hyper	113	21	11	315	84.33	3.37	2.5281e-35	9	8	GSBRNA2T00041469001:promoter
chrA02	5057500	5058000	500	hyper	113	21	11	315	84.33	3.37	2.5281e-35	9	8	GSBRNA2T00041469001:promoter
chrA02	5134500	5135000	500	hyper	101	5	20	64	95.28	23.81	4.5413e-07	7	7	GSBRNA2T00041482001:promoter
chrA02	5134500	5135000	500	hyper	101	5	20	64	95.28	23.81	4.5413e-07	7	7	GSBRNA2T00041482001:promoter
chrA02	5399600	5400100	500	hyper	69	39	2	47	63.89	4.08	1.896e-06	7	5	GSBRNA2T00036843001:promoter
chrA02	5399600	5400100	500	hyper	69	39	2	47	63.89	4.08	1.896e-06	7	5	GSBRNA2T00036843001:promoter
chrA02	5403300	5403800	500	hyper	132	72	1	77	64.71	1.28	7.2303e-11	12	9	GSBRNA2T00036845001:promoter
chrA02	5403300	5403800	500	hyper	132	72	1	77	64.71	1.28	7.2303e-11	12	9	GSBRNA2T00036845001:promoter
chrA02	5407200	5407700	500	hyper	129	11	47	60	92.14	43.93	0.00046416	10	10	GSBRNA2T00036845001:exon
chrA02	5532100	5532600	500	hyper	43	122	0	52	26.06	0	0.00033208	15	6	GSBRNA2T00036865001:exon
chrA02	5540300	5540800	500	hyper	56	42	3	49	57.14	5.77	1.234e-05	8	7	GSBRNA2T00036866001:promoter
chrA02	5540300	5540800	500	hyper	56	42	3	49	57.14	5.77	1.234e-05	8	7	GSBRNA2T00036866001:promoter
chrA02	5544400	5544900	500	hyper	237	25	8	37	90.46	17.78	6.3623e-06	8	6	GSBRNA2T00036867001:exon
chrA02	5685500	5686000	500	hyper	90	3	55	49	96.77	52.88	0.006469	7	10	GSBRNA2T00036893001:promoter
chrA02	5685500	5686000	500	hyper	90	3	55	49	96.77	52.88	0.006469	7	10	GSBRNA2T00036893001:promoter
chrA02	6002100	6002600	500	hyper	32	94	0	64	25.4	0	9.9556e-05	12	8	GSBRNA2T00090868001:promoter
chrA02	6002100	6002600	500	hyper	32	94	0	64	25.4	0	9.9556e-05	12	8	GSBRNA2T00090868001:promoter,GSBRNA2T00090869001:exon
chrA02	6026400	6026900	500	hyper	93	28	0	81	76.86	0	7.5059e-13	6	5	GSBRNA2T00090876001:promoter
chrA02	6026400	6026900	500	hyper	93	28	0	81	76.86	0	7.5059e-13	6	5	GSBRNA2T00090876001:promoter
chrA02	6239600	6240100	500	hyper	82	45	0	52	64.57	0	4.92e-08	10	5	GSBRNA2T00090922001:exon
chrA02	6331400	6332400	1000	hyper	217	75	10	283	74.32	3.41	1.3704e-33	17	19	GSBRNA2T00090945001:promoter
chrA02	6331400	6332400	1000	hyper	217	75	10	283	74.32	3.41	1.3704e-33	17	19	GSBRNA2T00090945001:promoter
chrA02	6473600	6474100	500	hyper	222	26	29	36	89.52	44.62	0.0035266	16	9	GSBRNA2T00090969001:promoter
chrA02	6473600	6474100	500	hyper	222	26	29	36	89.52	44.62	0.0035266	16	9	GSBRNA2T00090969001:promoter,GSBRNA2T00090969001:exon
chrA02	6485800	6486300	500	hyper	54	5	0	41	91.53	0	3.9515e-08	8	5	GSBRNA2T00090972001:promoter,GSBRNA2T00090974001:promoter,GSBRNA2T00090973001:promoter
chrA02	6485800	6486300	500	hyper	54	5	0	41	91.53	0	3.9515e-08	8	5	GSBRNA2T00090972001:promoter,GSBRNA2T00090974001:promoter,GSBRNA2T00090973001:promoter,GSBRNA2T00090973001:exon,GSBRNA2T00090973001:exon
chrA02	6701900	6702400	500	hyper	59	59	0	33	50	0	9.1813e-05	14	6	GSBRNA2T00091008001:exon
chrA02	6763700	6764200	500	hyper	19	31	0	41	38	0	0.00022058	7	5	GSBRNA2T00070084001:promoter,GSBRNA2T00070085001:promoter
chrA02	6763700	6764200	500	hyper	19	31	0	41	38	0	0.00022058	7	5	GSBRNA2T00070084001:promoter,GSBRNA2T00070085001:promoter
chrA02	6861800	6862300	500	hyper	85	71	0	54	54.49	0	2.31e-07	14	6	GSBRNA2T00070108001:promoter
chrA02	6861800	6862300	500	hyper	85	71	0	54	54.49	0	2.31e-07	14	6	GSBRNA2T00070108001:promoter
chrA02	6909000	6909500	500	hyper	12	34	0	55	26.09	0	0.00035959	5	5	GSBRNA2T00070110001:exon,GSBRNA2T00070110001:exon,GSBRNA2T00070110001:exon
chrA02	6937500	6939500	2000	hyper	203	55	0	182	78.68	0	2.7044e-27	20	15	GSBRNA2T00070118001:promoter
chrA02	6937500	6939500	2000	hyper	203	55	0	182	78.68	0	2.7044e-27	20	15	GSBRNA2T00070118001:promoter
chrA02	7010200	7010700	500	hyper	31	7	4	45	81.58	8.16	6.0474e-06	5	6	GSBRNA2T00070125001:intron
chrA02	7048500	7049000	500	hyper	94	10	0	79	90.38	0	4.899e-14	6	6	GSBRNA2T00070135001:promoter
chrA02	7048500	7049000	500	hyper	94	10	0	79	90.38	0	4.899e-14	6	6	GSBRNA2T00070135001:promoter
chrA02	7068100	7068600	500	hyper	48	51	0	46	48.48	0	7.7739e-06	11	5	GSBRNA2T00070139001:promoter
chrA02	7068100	7068600	500	hyper	48	51	0	46	48.48	0	7.7739e-06	11	5	GSBRNA2T00070139001:promoter
chrA02	7164400	7164900	500	hyper	110	16	19	50	87.3	27.54	4.2773e-05	10	7	GSBRNA2T00070153001:promoter
chrA02	7164400	7164900	500	hyper	110	16	19	50	87.3	27.54	4.2773e-05	10	7	GSBRNA2T00070153001:promoter
chrA02	7174000	7174500	500	hyper	49	42	0	55	53.85	0	3.9664e-07	12	5	GSBRNA2T00070155001:promoter
chrA02	7174000	7174500	500	hyper	49	42	0	55	53.85	0	3.9664e-07	12	5	GSBRNA2T00070155001:promoter
chrA02	7218700	7219200	500	hyper	28	14	0	49	66.67	0	4.1339e-07	5	6	GSBRNA2T00070165001:promoter
chrA02	7218700	7219200	500	hyper	28	14	0	49	66.67	0	4.1339e-07	5	6	GSBRNA2T00070165001:promoter
chrA02	7297700	7298700	1000	hyper	364	68	157	100	84.26	61.09	0.0092781	31	26	GSBRNA2T00070180001:promoter
chrA02	7297700	7298700	1000	hyper	364	68	157	100	84.26	61.09	0.0092781	31	26	GSBRNA2T00070180001:promoter
chrA02	7395900	7396400	500	hyper	70	71	0	49	49.65	0	2.3999e-06	14	5	GSBRNA2T00070199001:promoter
chrA02	7395900	7396400	500	hyper	70	71	0	49	49.65	0	2.3999e-06	14	5	GSBRNA2T00070199001:promoter
chrA02	7490500	7491000	500	hyper	182	25	12	28	87.92	30	0.0012165	17	7	GSBRNA2T00070223001:exon
chrA02	7685700	7686200	500	hyper	46	2	22	58	95.83	27.5	5.7873e-05	5	7	GSBRNA2T00081045001:exon
chrA02	7708800	7709300	500	hyper	57	6	10	73	90.48	12.05	1.0138e-08	6	6	GSBRNA2T00081042001:promoter
chrA02	7708800	7709300	500	hyper	57	6	10	73	90.48	12.05	1.0138e-08	6	6	GSBRNA2T00081042001:promoter
chrA02	7806400	7806900	500	hyper	54	16	1	47	77.14	2.08	1.2745e-07	7	5	GSBRNA2T00082805001:promoter
chrA02	7806400	7806900	500	hyper	54	16	1	47	77.14	2.08	1.2745e-07	7	5	GSBRNA2T00082805001:promoter
chrA02	7927100	7927600	500	hyper	94	2	0	57	97.92	0	1.5067e-11	6	7	GSBRNA2T00082786001:promoter
chrA02	7927100	7927600	500	hyper	94	2	0	57	97.92	0	1.5067e-11	6	7	GSBRNA2T00082786001:promoter
chrA02	8102200	8102700	500	hyper	33	6	2	32	84.62	5.88	2.4869e-05	6	6	GSBRNA2T00079496001:promoter
chrA02	8102200	8102700	500	hyper	33	6	2	32	84.62	5.88	2.4869e-05	6	6	GSBRNA2T00079496001:promoter
chrA02	8311600	8312100	500	hyper	85	10	51	59	89.47	46.36	0.0034259	12	9	GSBRNA2T00096393001:promoter
chrA02	8311600	8312100	500	hyper	85	10	51	59	89.47	46.36	0.0034259	12	9	GSBRNA2T00096393001:promoter
chrA02	8411400	8411900	500	hyper	126	9	6	94	93.33	6	1.2585e-14	5	5	GSBRNA2T00116593001:intron
chrA02	8450600	8451100	500	hyper	69	32	0	56	68.32	0	1.065e-08	8	7	GSBRNA2T00116590001:promoter
chrA02	8450600	8451100	500	hyper	69	32	0	56	68.32	0	1.065e-08	8	7	GSBRNA2T00116590001:promoter
chrA02	8579400	8579900	500	hyper	133	37	0	80	78.24	0	2.2232e-13	14	12	GSBRNA2T00116568001:promoter
chrA02	8579400	8579900	500	hyper	133	37	0	80	78.24	0	2.2232e-13	14	12	GSBRNA2T00116568001:promoter
chrA02	8754400	8754900	500	hyper	80	57	11	63	58.39	14.86	4.5999e-05	7	7	GSBRNA2T00116524001:promoter
chrA02	8754400	8754900	500	hyper	80	57	11	63	58.39	14.86	4.5999e-05	7	7	GSBRNA2T00116524001:promoter
chrA02	8797800	8798800	1000	hyper	94	71	1	204	56.97	0.49	1.8486e-21	14	14	GSBRNA2T00116512001:promoter
chrA02	8797800	8798800	1000	hyper	94	71	1	204	56.97	0.49	1.8486e-21	14	14	GSBRNA2T00116512001:promoter
chrA02	8989700	8990200	500	hyper	67	8	2	53	89.33	3.64	4.8437e-09	9	7	GSBRNA2T00116480001:promoter
chrA02	8989700	8990200	500	hyper	67	8	2	53	89.33	3.64	4.8437e-09	9	7	GSBRNA2T00116480001:promoter,GSBRNA2T00116480001:exon
chrA02	9094100	9094600	500	hyper	46	14	16	56	76.67	22.22	0.00017726	6	7	GSBRNA2T00116463001:promoter
chrA02	9094100	9094600	500	hyper	46	14	16	56	76.67	22.22	0.00017726	6	7	GSBRNA2T00116463001:promoter
chrA02	9107900	9108400	500	hyper	40	19	5	46	67.8	9.8	3.3668e-05	9	7	GSBRNA2T00116460001:promoter
chrA02	9107900	9108400	500	hyper	40	19	5	46	67.8	9.8	3.3668e-05	9	7	GSBRNA2T00116460001:promoter,GSBRNA2T00116461001:exon,GSBRNA2T00116461001:exon,GSBRNA2T00116461001:exon
chrA02	9253900	9255200	1300	hyper	119	76	9	156	61.03	5.45	3.4919e-15	19	18	GSBRNA2T00116439001:promoter
chrA02	9253900	9255200	1300	hyper	119	76	9	156	61.03	5.45	3.4919e-15	19	18	GSBRNA2T00116439001:promoter
chrA02	9255300	9255800	500	hyper	79	16	36	62	83.16	36.73	0.00085512	7	9	GSBRNA2T00116439001:promoter
chrA02	9255300	9255800	500	hyper	79	16	36	62	83.16	36.73	0.00085512	7	9	GSBRNA2T00116439001:promoter
chrA02	9424600	9425100	500	hyper	20	18	3	76	52.63	3.8	1.2431e-06	5	8	GSBRNA2T00116417001:promoter
chrA02	9424600	9425100	500	hyper	20	18	3	76	52.63	3.8	1.2431e-06	5	8	GSBRNA2T00116417001:promoter,GSBRNA2T00116416001:exon
chrA02	9560000	9560500	500	hyper	54	149	0	91	26.6	0	1.9613e-06	11	6	GSBRNA2T00093937001:promoter
chrA02	9560000	9560500	500	hyper	54	149	0	91	26.6	0	1.9613e-06	11	6	GSBRNA2T00093937001:promoter
chrA02	9728300	9728800	500	hyper	87	25	5	30	77.68	14.29	0.00021333	9	6	GSBRNA2T00088695001:exon,GSBRNA2T00088695001:exon
chrA02	10245500	10246000	500	hyper	240	35	4	29	87.27	12.12	2.2929e-05	15	5	GSBRNA2T00083140001:promoter,GSBRNA2T00083141001:promoter
chrA02	10245500	10246000	500	hyper	240	35	4	29	87.27	12.12	2.2929e-05	15	5	GSBRNA2T00083140001:promoter,GSBRNA2T00083141001:promoter
chrA02	10314800	10315300	500	hyper	19	16	0	38	54.29	0	4.0446e-05	5	6	GSBRNA2T00067165001:exon,GSBRNA2T00067165001:exon,GSBRNA2T00067165001:exon
chrA02	10592100	10592600	500	hyper	47	21	0	62	69.12	0	4.2621e-09	11	9	GSBRNA2T00067218001:promoter,GSBRNA2T00067216001:promoter,GSBRNA2T00067217001:promoter
chrA02	10592100	10592600	500	hyper	47	21	0	62	69.12	0	4.2621e-09	11	9	GSBRNA2T00067218001:promoter,GSBRNA2T00067216001:promoter,GSBRNA2T00067217001:promoter
chrA02	10789600	10790100	500	hyper	32	7	0	56	82.05	0	6.2955e-09	5	8	GSBRNA2T00082962001:promoter
chrA02	10789600	10790100	500	hyper	32	7	0	56	82.05	0	6.2955e-09	5	8	GSBRNA2T00082962001:promoter
chrA02	10879600	10880100	500	hyper	18	28	2	39	39.13	4.88	0.0022604	5	5	GSBRNA2T00083108001:promoter,GSBRNA2T00083107001:promoter
chrA02	10879600	10880100	500	hyper	18	28	2	39	39.13	4.88	0.0022604	5	5	GSBRNA2T00083108001:promoter,GSBRNA2T00083107001:promoter,GSBRNA2T00083106001:exon,GSBRNA2T00083106001:exon,GSBRNA2T00083106001:exon
chrA02	11840900	11841400	500	hyper	60	4	12	24	93.75	33.33	0.0052916	8	5	GSBRNA2T00036571001:exon
chrA02	11855100	11855600	500	hyper	39	8	0	38	82.98	0	5.3336e-07	6	7	GSBRNA2T00036577001:promoter
chrA02	11855100	11855600	500	hyper	39	8	0	38	82.98	0	5.3336e-07	6	7	GSBRNA2T00036577001:promoter,GSBRNA2T00036577001:exon
chrA02	11856700	11857200	500	hyper	60	15	3	45	80	6.25	7.1475e-07	5	5	GSBRNA2T00036577001:promoter
chrA02	11856700	11857200	500	hyper	60	15	3	45	80	6.25	7.1475e-07	5	5	GSBRNA2T00036577001:promoter
chrA02	11947900	11948900	1000	hyper	83	5	23	53	94.32	30.26	4.0717e-05	12	10	GSBRNA2T00093751001:exon
chrA02	12064400	12064900	500	hyper	246	40	2	39	86.01	4.88	1.179e-07	15	5	GSBRNA2T00010236001:exon,GSBRNA2T00010236001:exon
chrA02	12120200	12120700	500	hyper	44	32	0	31	57.89	0	6.1992e-05	10	5	GSBRNA2T00064251001:promoter
chrA02	12120200	12120700	500	hyper	44	32	0	31	57.89	0	6.1992e-05	10	5	GSBRNA2T00064251001:promoter,GSBRNA2T00064252001:exon,GSBRNA2T00064252001:exon,GSBRNA2T00064252001:exon
chrA02	12161600	12162100	500	hyper	54	19	0	86	73.97	0	2.5781e-12	9	12	GSBRNA2T00064247001:promoter,GSBRNA2T00064246001:promoter
chrA02	12161600	12162100	500	hyper	54	19	0	86	73.97	0	2.5781e-12	9	12	GSBRNA2T00064247001:promoter,GSBRNA2T00064246001:promoter,GSBRNA2T00064247001:exon,GSBRNA2T00064247001:exon
chrA02	12251800	12252800	1000	hyper	197	14	72	163	93.36	30.64	1.1656e-11	15	17	GSBRNA2T00064228001:promoter
chrA02	12251800	12252800	1000	hyper	197	14	72	163	93.36	30.64	1.1656e-11	15	17	GSBRNA2T00064228001:promoter
chrA02	12299600	12300100	500	hyper	34	19	0	37	64.15	0	8.0652e-06	6	5	GSBRNA2T00064215001:promoter,GSBRNA2T00064216001:promoter
chrA02	12299600	12300100	500	hyper	34	19	0	37	64.15	0	8.0652e-06	6	5	GSBRNA2T00064215001:promoter,GSBRNA2T00064216001:promoter,GSBRNA2T00064215001:exon
chrA02	12325800	12326300	500	hyper	374	36	3	193	91.22	1.53	5.1545e-33	5	5	GSBRNA2T00064207001:promoter
chrA02	12325800	12326300	500	hyper	374	36	3	193	91.22	1.53	5.1545e-33	5	5	GSBRNA2T00064207001:promoter
chrA02	12777600	12778100	500	hyper	16	51	0	39	23.88	0	0.0032655	6	5	GSBRNA2T00104274001:promoter
chrA02	12777600	12778100	500	hyper	16	51	0	39	23.88	0	0.0032655	6	5	GSBRNA2T00104274001:promoter
chrA02	12962700	12963200	500	hyper	102	29	0	66	77.86	0	3.541e-11	6	5	GSBRNA2T00104299001:intron
chrA02	13744300	13744800	500	hyper	27	46	1	94	36.99	1.05	2.0842e-07	5	10	GSBRNA2T00104431001:exon
chrA02	13768800	13769300	500	hyper	30	82	0	98	26.79	0	1.1483e-06	9	10	GSBRNA2T00104436001:exon
chrA02	13855400	13855900	500	hyper	77	13	7	55	85.56	11.29	1.5338e-07	6	6	GSBRNA2T00087452001:intron
chrA02	14049400	14050400	1000	hyper	223	32	93	72	87.45	56.36	0.0055428	17	15	GSBRNA2T00029365001:promoter,GSBRNA2T00029364001:promoter
chrA02	14049400	14050400	1000	hyper	223	32	93	72	87.45	56.36	0.0055428	17	15	GSBRNA2T00029365001:promoter,GSBRNA2T00029364001:promoter
chrA02	14163700	14164200	500	hyper	59	25	0	60	70.24	0	3.4743e-09	7	8	GSBRNA2T00029343001:promoter
chrA02	14163700	14164200	500	hyper	59	25	0	60	70.24	0	3.4743e-09	7	8	GSBRNA2T00029343001:promoter
chrA02	14411500	14412000	500	hyper	185	20	10	42	90.24	19.23	3.7766e-06	17	6	GSBRNA2T00029297001:promoter
chrA02	14411500	14412000	500	hyper	185	20	10	42	90.24	19.23	3.7766e-06	17	6	GSBRNA2T00029297001:promoter
chrA02	14554800	14555300	500	hyper	40	104	0	92	27.78	0	1.3228e-06	8	6	GSBRNA2T00029277001:promoter
chrA02	14554800	14555300	500	hyper	40	104	0	92	27.78	0	1.3228e-06	8	6	GSBRNA2T00029277001:promoter
chrA02	15117700	15118200	500	hyper	61	22	0	64	73.49	0	5.8787e-10	5	5	GSBRNA2T00084836001:promoter
chrA02	15117700	15118200	500	hyper	61	22	0	64	73.49	0	5.8787e-10	5	5	GSBRNA2T00084836001:promoter
chrA02	15222800	15223800	1000	hyper	41	73	0	210	35.96	0	2.5614e-15	12	25	GSBRNA2T00084854001:promoter
chrA02	15222800	15223800	1000	hyper	41	73	0	210	35.96	0	2.5614e-15	12	25	GSBRNA2T00084854001:promoter,GSBRNA2T00084854001:exon
chrA02	15853500	15854500	1000	hyper	171	60	13	181	74.03	6.7	2.709e-20	16	15	GSBRNA2T00113945001:promoter
chrA02	15853500	15854500	1000	hyper	171	60	13	181	74.03	6.7	2.709e-20	16	15	GSBRNA2T00113945001:promoter
chrA02	16234100	16235100	1000	hyper	93	21	2	202	81.58	0.98	2.5895e-26	12	12	GSBRNA2T00114002001:promoter
chrA02	16234100	16235100	1000	hyper	93	21	2	202	81.58	0.98	2.5895e-26	12	12	GSBRNA2T00114002001:promoter
chrA02	17064100	17064600	500	hyper	75	13	0	48	85.23	0	4.808e-09	8	7	GSBRNA2T00035161001:promoter
chrA02	17064100	17064600	500	hyper	75	13	0	48	85.23	0	4.808e-09	8	7	GSBRNA2T00035161001:promoter
chrA02	17303100	17303600	500	hyper	37	40	0	72	48.05	0	6.6253e-08	6	8	GSBRNA2T00035126001:exon
chrA02	17582900	17584200	1300	hyper	109	48	0	134	69.43	0	3.6962e-18	18	14	GSBRNA2T00091693001:promoter,GSBRNA2T00091692001:promoter
chrA02	17582900	17584200	1300	hyper	109	48	0	134	69.43	0	3.6962e-18	18	14	GSBRNA2T00091693001:promoter,GSBRNA2T00091692001:promoter
chrA02	17645400	17645900	500	hyper	44	137	7	77	24.31	8.33	0.0094404	11	9	GSBRNA2T00091705001:promoter
chrA02	17645400	17645900	500	hyper	44	137	7	77	24.31	8.33	0.0094404	11	9	GSBRNA2T00091705001:promoter
chrA02	17682500	17683000	500	hyper	29	73	0	110	28.43	0	1.4297e-07	12	12	GSBRNA2T00091710001:exon,GSBRNA2T00091710001:exon
chrA02	17800100	17801300	1200	hyper	163	18	0	159	90.06	0	4.694e-26	14	14	GSBRNA2T00079353001:promoter,GSBRNA2T00079354001:promoter
chrA02	17800100	17801300	1200	hyper	163	18	0	159	90.06	0	4.694e-26	14	14	GSBRNA2T00079353001:promoter,GSBRNA2T00079354001:promoter,GSBRNA2T00079353001:exon,GSBRNA2T00079353001:exon
chrA02	17873600	17874100	500	hyper	98	6	23	33	94.23	41.07	0.0031506	10	8	GSBRNA2T00079362001:promoter
chrA02	17873600	17874100	500	hyper	98	6	23	33	94.23	41.07	0.0031506	10	8	GSBRNA2T00079362001:promoter,GSBRNA2T00079362001:exon
chrA02	17909200	17909700	500	hyper	40	7	1	141	85.11	0.7	3.299e-18	6	16	GSBRNA2T00079367001:promoter
chrA02	17909200	17909700	500	hyper	40	7	1	141	85.11	0.7	3.299e-18	6	16	GSBRNA2T00079367001:promoter
chrA02	18248100	18248600	500	hyper	23	29	0	52	44.23	0	1.0201e-05	7	9	GSBRNA2T00063441001:exon,GSBRNA2T00063441001:exon
chrA02	18347900	18348400	500	hyper	38	47	0	43	44.71	0	3.3144e-05	7	6	GSBRNA2T00041695001:exon
chrA02	18366200	18366700	500	hyper	43	11	0	38	79.63	0	6.6336e-07	5	5	GSBRNA2T00041693001:promoter
chrA02	18366200	18366700	500	hyper	43	11	0	38	79.63	0	6.6336e-07	5	5	GSBRNA2T00041693001:promoter,GSBRNA2T00041693001:exon,GSBRNA2T00041693001:exon
chrA02	18623900	18624400	500	hyper	55	38	0	119	59.14	0	8.4594e-14	5	5	GSBRNA2T00041652001:promoter,GSBRNA2T00041651001:promoter
chrA02	18623900	18624400	500	hyper	55	38	0	119	59.14	0	8.4594e-14	5	5	GSBRNA2T00041652001:promoter,GSBRNA2T00041651001:promoter
chrA02	18648800	18649300	500	hyper	68	39	0	42	63.55	0	1.0867e-06	14	6	GSBRNA2T00041642001:promoter,GSBRNA2T00041641001:promoter,GSBRNA2T00041643001:promoter
chrA02	18648800	18649300	500	hyper	68	39	0	42	63.55	0	1.0867e-06	14	6	GSBRNA2T00041642001:promoter,GSBRNA2T00041641001:promoter,GSBRNA2T00041643001:promoter
chrA02	18789600	18790100	500	hyper	25	28	2	74	47.17	2.63	1.1297e-06	7	8	GSBRNA2T00041611001:promoter,GSBRNA2T00041609001:promoter
chrA02	18789600	18790100	500	hyper	25	28	2	74	47.17	2.63	1.1297e-06	7	8	GSBRNA2T00041611001:promoter,GSBRNA2T00041609001:promoter,GSBRNA2T00041610001:exon
chrA02	19079000	19079500	500	hyper	97	9	0	53	91.51	0	1.708e-10	9	8	GSBRNA2T00030897001:promoter
chrA02	19079000	19079500	500	hyper	97	9	0	53	91.51	0	1.708e-10	9	8	GSBRNA2T00030897001:promoter
chrA02	19121700	19122200	500	hyper	129	11	17	41	92.14	29.31	8.9155e-05	9	7	GSBRNA2T00030887001:intron
chrA02	19160900	19161400	500	hyper	524	60	10	247	89.73	3.89	3.0455e-39	37	10	GSBRNA2T00030883001:intron
chrA02	19223800	19224300	500	hyper	31	8	0	32	79.49	0	6.4192e-06	6	6	GSBRNA2T00030876001:promoter,GSBRNA2T00030875001:promoter
chrA02	19223800	19224300	500	hyper	31	8	0	32	79.49	0	6.4192e-06	6	6	GSBRNA2T00030876001:promoter,GSBRNA2T00030875001:promoter,GSBRNA2T00030876001:exon,GSBRNA2T00030875001:exon
chrA02	19256800	19257300	500	hyper	65	16	71	86	80.25	45.22	0.0086872	6	7	GSBRNA2T00030872001:promoter
chrA02	19256800	19257300	500	hyper	65	16	71	86	80.25	45.22	0.0086872	6	7	GSBRNA2T00030872001:promoter
chrA02	19373900	19374400	500	hyper	117	25	43	57	82.39	43	0.0030589	7	7	GSBRNA2T00030862001:promoter
chrA02	19373900	19374400	500	hyper	117	25	43	57	82.39	43	0.0030589	7	7	GSBRNA2T00030862001:promoter
chrA02	19389500	19390000	500	hyper	25	42	0	57	37.31	0	1.6021e-05	6	8	GSBRNA2T00030858001:promoter
chrA02	19389500	19390000	500	hyper	25	42	0	57	37.31	0	1.6021e-05	6	8	GSBRNA2T00030858001:promoter
chrA02	19427100	19427600	500	hyper	33	47	5	51	41.25	8.93	0.0013733	8	9	GSBRNA2T00030850001:promoter
chrA02	19427100	19427600	500	hyper	33	47	5	51	41.25	8.93	0.0013733	8	9	GSBRNA2T00030850001:promoter,GSBRNA2T00030849001:exon
chrA02	19547100	19547600	500	hyper	52	4	28	107	92.86	20.74	4.4413e-08	5	9	GSBRNA2T00030823001:exon
chrA02	19667100	19667600	500	hyper	37	43	0	78	46.25	0	3.4382e-08	7	7	GSBRNA2T00030804001:promoter,GSBRNA2T00030803001:promoter
chrA02	19667100	19667600	500	hyper	37	43	0	78	46.25	0	3.4382e-08	7	7	GSBRNA2T00030804001:promoter,GSBRNA2T00030803001:promoter
chrA02	19730400	19731400	1000	hyper	230	99	6	244	69.91	2.4	8.7183e-30	13	13	GSBRNA2T00030791001:promoter
chrA02	19730400	19731400	1000	hyper	230	99	6	244	69.91	2.4	8.7183e-30	13	13	GSBRNA2T00030791001:promoter
chrA02	19731600	19732100	500	hyper	63	5	12	43	92.65	21.82	3.436e-05	5	5	GSBRNA2T00030791001:exon
chrA02	19791100	19791600	500	hyper	34	18	0	140	65.38	0	6.9402e-16	5	20	GSBRNA2T00069560001:promoter,GSBRNA2T00069561001:promoter
chrA02	19791100	19791600	500	hyper	34	18	0	140	65.38	0	6.9402e-16	5	20	GSBRNA2T00069560001:promoter,GSBRNA2T00069561001:promoter
chrA02	20013000	20013500	500	hyper	84	9	0	93	90.32	0	1.2021e-15	6	8	GSBRNA2T00069597001:promoter,GSBRNA2T00069598001:promoter
chrA02	20013000	20013500	500	hyper	84	9	0	93	90.32	0	1.2021e-15	6	8	GSBRNA2T00069597001:promoter,GSBRNA2T00069598001:promoter,GSBRNA2T00069597001:exon,GSBRNA2T00069597001:exon,GSBRNA2T00069598001:exon
chrA02	20189900	20190400	500	hyper	36	23	0	40	61.02	0	5.4568e-06	6	5	GSBRNA2T00093598001:promoter
chrA02	20189900	20190400	500	hyper	36	23	0	40	61.02	0	5.4568e-06	6	5	GSBRNA2T00093598001:promoter
chrA02	20196600	20197100	500	hyper	34	35	0	61	49.28	0	4.6538e-07	8	7	GSBRNA2T00093599001:promoter
chrA02	20196600	20197100	500	hyper	34	35	0	61	49.28	0	4.6538e-07	8	7	GSBRNA2T00093599001:promoter,GSBRNA2T00093599001:exon
chrA02	20344200	20344700	500	hyper	67	20	1	44	77.01	2.22	2.071e-07	12	5	GSBRNA2T00084110001:promoter
chrA02	20344200	20344700	500	hyper	67	20	1	44	77.01	2.22	2.071e-07	12	5	GSBRNA2T00084110001:promoter
chrA02	20413100	20413600	500	hyper	138	12	0	93	92	0	6.3357e-17	5	5	GSBRNA2T00072243001:promoter
chrA02	20413100	20413600	500	hyper	138	12	0	93	92	0	6.3357e-17	5	5	GSBRNA2T00072243001:promoter
chrA02	20521700	20522200	500	hyper	38	10	8	26	79.17	23.53	0.005384	8	5	GSBRNA2T00072263001:exon
chrA02	20550200	20551600	1400	hyper	193	75	7	164	72.01	4.09	1.8614e-20	23	17	GSBRNA2T00072271001:promoter
chrA02	20550200	20551600	1400	hyper	193	75	7	164	72.01	4.09	1.8614e-20	23	17	GSBRNA2T00072271001:promoter
chrA02	20798400	20798900	500	hyper	82	8	33	56	91.11	37.08	0.00035616	6	6	GSBRNA2T00092171001:promoter,GSBRNA2T00092169001:promoter
chrA02	20798400	20798900	500	hyper	82	8	33	56	91.11	37.08	0.00035616	6	6	GSBRNA2T00092171001:promoter,GSBRNA2T00092169001:promoter
chrA02	20808600	20809600	1000	hyper	82	125	3	140	39.61	2.1	6.2665e-11	17	15	GSBRNA2T00092168001:promoter
chrA02	20808600	20809600	1000	hyper	82	125	3	140	39.61	2.1	6.2665e-11	17	15	GSBRNA2T00092168001:promoter
chrA02	20818100	20818600	500	hyper	32	15	0	41	68.09	0	1.9469e-06	7	6	GSBRNA2T00056207001:promoter
chrA02	20818100	20818600	500	hyper	32	15	0	41	68.09	0	1.9469e-06	7	6	GSBRNA2T00056207001:promoter
chrA02	20937600	20938100	500	hyper	46	41	0	97	52.87	0	9.4306e-11	8	8	GSBRNA2T00056188001:promoter
chrA02	20937600	20938100	500	hyper	46	41	0	97	52.87	0	9.4306e-11	8	8	GSBRNA2T00056188001:promoter
chrA02	20958700	20959200	500	hyper	29	69	0	79	29.59	0	4.6049e-06	8	8	GSBRNA2T00056184001:promoter,GSBRNA2T00056183001:promoter
chrA02	20958700	20959200	500	hyper	29	69	0	79	29.59	0	4.6049e-06	8	8	GSBRNA2T00056184001:promoter,GSBRNA2T00056183001:promoter
chrA02	20968300	20969300	1000	hyper	97	8	95	88	92.38	51.91	0.0022337	12	21	GSBRNA2T00056180001:promoter
chrA02	20968300	20969300	1000	hyper	97	8	95	88	92.38	51.91	0.0022337	12	21	GSBRNA2T00056180001:promoter
chrA02	21000500	21001000	500	hyper	171	19	37	38	90	49.33	0.0075913	9	5	GSBRNA2T00056173001:promoter
chrA02	21000500	21001000	500	hyper	171	19	37	38	90	49.33	0.0075913	9	5	GSBRNA2T00056173001:promoter
chrA02	21006600	21007100	500	hyper	110	7	26	32	94.02	44.83	0.0057223	9	7	GSBRNA2T00056172001:promoter
chrA02	21006600	21007100	500	hyper	110	7	26	32	94.02	44.83	0.0057223	9	7	GSBRNA2T00056172001:promoter
chrA02	21246100	21246600	500	hyper	140	21	0	81	86.96	0	1.242e-14	6	6	GSBRNA2T00093777001:promoter
chrA02	21246100	21246600	500	hyper	140	21	0	81	86.96	0	1.242e-14	6	6	GSBRNA2T00093777001:promoter
chrA02	21294400	21294900	500	hyper	61	19	5	38	76.25	11.63	3.7393e-05	5	5	GSBRNA2T00093764001:promoter
chrA02	21294400	21294900	500	hyper	61	19	5	38	76.25	11.63	3.7393e-05	5	5	GSBRNA2T00093764001:promoter
chrA02	21348500	21349000	500	hyper	103	151	27	208	40.55	11.49	2.1804e-08	9	9	GSBRNA2T00093754001:promoter
chrA02	21348500	21349000	500	hyper	103	151	27	208	40.55	11.49	2.1804e-08	9	9	GSBRNA2T00093754001:promoter
chrA02	21460300	21460800	500	hyper	70	35	14	71	66.67	16.47	8.2096e-06	8	9	GSBRNA2T00086969001:promoter
chrA02	21460300	21460800	500	hyper	70	35	14	71	66.67	16.47	8.2096e-06	8	9	GSBRNA2T00086969001:promoter
chrA02	21476500	21477000	500	hyper	83	81	12	79	50.61	13.19	2.5673e-05	11	10	GSBRNA2T00086972001:exon,GSBRNA2T00086972001:exon,GSBRNA2T00086972001:exon
chrA02	21588700	21589200	500	hyper	51	18	1	68	73.91	1.45	9.0612e-10	6	5	GSBRNA2T00080100001:exon
chrA02	21651700	21652200	500	hyper	205	92	59	165	69.02	26.34	1.2579e-08	25	19	GSBRNA2T00080081001:promoter
chrA02	21651700	21652200	500	hyper	205	92	59	165	69.02	26.34	1.2579e-08	25	19	GSBRNA2T00080081001:promoter
chrA02	21691900	21692400	500	hyper	45	3	24	45	93.75	34.78	0.0014348	4	4	GSBRNA2T00080064001:promoter
chrA02	21691900	21692400	500	hyper	45	3	24	45	93.75	34.78	0.0014348	4	4	GSBRNA2T00080064001:promoter
chrA02	21692500	21693000	500	hyper	74	31	11	54	70.48	16.92	3.1431e-05	8	5	GSBRNA2T00080064001:promoter
chrA02	21692500	21693000	500	hyper	74	31	11	54	70.48	16.92	3.1431e-05	8	5	GSBRNA2T00080064001:promoter
chrA02	21886800	21887800	1000	hyper	44	67	0	74	39.64	0	3.4096e-07	17	12	GSBRNA2T00091664001:promoter,GSBRNA2T00091663001:promoter
chrA02	21886800	21887800	1000	hyper	44	67	0	74	39.64	0	3.4096e-07	17	12	GSBRNA2T00091664001:promoter,GSBRNA2T00091663001:promoter,GSBRNA2T00091664001:exon
chrA02	21888400	21888900	500	hyper	66	9	0	45	88	0	1.104e-08	5	5	GSBRNA2T00091666001:promoter
chrA02	21888400	21888900	500	hyper	66	9	0	45	88	0	1.104e-08	5	5	GSBRNA2T00091666001:promoter
chrA02	21896300	21896800	500	hyper	22	57	0	45	27.85	0	0.00068077	7	7	GSBRNA2T00091668001:promoter
chrA02	21896300	21896800	500	hyper	22	57	0	45	27.85	0	0.00068077	7	7	GSBRNA2T00091668001:promoter
chrA02	21934500	21935000	500	hyper	26	36	0	58	41.94	0	4.9689e-06	8	7	GSBRNA2T00098106001:promoter
chrA02	21934500	21935000	500	hyper	26	36	0	58	41.94	0	4.9689e-06	8	7	GSBRNA2T00098106001:promoter,GSBRNA2T00098107001:exon
chrA02	22162500	22163000	500	hyper	21	64	0	55	24.71	0	0.00040033	8	7	GSBRNA2T00055425001:exon
chrA02	22278300	22278800	500	hyper	36	21	5	42	63.16	10.64	0.00019071	9	8	GSBRNA2T00055405001:promoter
chrA02	22278300	22278800	500	hyper	36	21	5	42	63.16	10.64	0.00019071	9	8	GSBRNA2T00055405001:promoter
chrA02	22294800	22295300	500	hyper	50	1	11	73	98.04	13.1	9.9643e-09	6	8	GSBRNA2T00055401001:exon,GSBRNA2T00055401001:exon,GSBRNA2T00055401001:exon
chrA02	22359100	22359600	500	hyper	43	60	0	39	41.75	0	0.00010955	7	7	GSBRNA2T00055396001:exon,GSBRNA2T00055396001:exon
chrA02	22503900	22504400	500	hyper	33	39	0	38	45.83	0	8.1391e-05	10	6	GSBRNA2T00120527001:exon,GSBRNA2T00120527001:exon
chrA02	22635700	22636200	500	hyper	100	64	0	109	60.98	0	5.8781e-14	7	7	GSBRNA2T00120498001:promoter
chrA02	22635700	22636200	500	hyper	100	64	0	109	60.98	0	5.8781e-14	7	7	GSBRNA2T00120498001:promoter
chrA02	23143900	23144400	500	hyper	25	73	0	112	25.51	0	4.4833e-07	8	10	GSBRNA2T00120396001:promoter
chrA02	23143900	23144400	500	hyper	25	73	0	112	25.51	0	4.4833e-07	8	10	GSBRNA2T00120396001:promoter,GSBRNA2T00120396001:exon
chrA02	23160600	23161100	500	hyper	18	15	0	32	54.55	0	0.00014611	6	5	GSBRNA2T00120392001:promoter,GSBRNA2T00120390001:promoter
chrA02	23160600	23161100	500	hyper	18	15	0	32	54.55	0	0.00014611	6	5	GSBRNA2T00120392001:promoter,GSBRNA2T00120390001:promoter,GSBRNA2T00120391001:exon
chrA02	23225500	23226000	500	hyper	38	37	3	121	50.67	2.42	1.3278e-10	9	9	GSBRNA2T00120377001:promoter
chrA02	23225500	23226000	500	hyper	38	37	3	121	50.67	2.42	1.3278e-10	9	9	GSBRNA2T00120377001:promoter
chrA02	23307500	23308000	500	hyper	55	32	1	64	63.22	1.54	1.7795e-08	6	5	GSBRNA2T00120357001:promoter
chrA02	23307500	23308000	500	hyper	55	32	1	64	63.22	1.54	1.7795e-08	6	5	GSBRNA2T00120357001:promoter
chrA02	23537500	23538000	500	hyper	108	19	23	38	85.04	37.7	0.0029739	9	8	GSBRNA2T00086452001:promoter
chrA02	23537500	23538000	500	hyper	108	19	23	38	85.04	37.7	0.0029739	9	8	GSBRNA2T00086452001:promoter
chrA02	23706800	23707300	500	hyper	33	37	8	135	47.14	5.59	1.2896e-08	7	9	GSBRNA2T00046020001:exon
chrA02	23802500	23803500	1000	hyper	80	126	20	138	38.83	12.66	2.0135e-05	23	15	GSBRNA2T00046042001:promoter,GSBRNA2T00046043001:promoter,GSBRNA2T00046044001:promoter
chrA02	23802500	23803500	1000	hyper	80	126	20	138	38.83	12.66	2.0135e-05	23	15	GSBRNA2T00046042001:promoter,GSBRNA2T00046043001:promoter,GSBRNA2T00046044001:promoter,GSBRNA2T00046044001:exon,GSBRNA2T00046044001:exon,GSBRNA2T00046044001:exon
chrA02	23868800	23869300	500	hyper	93	11	43	131	89.42	24.71	3.0936e-09	5	8	GSBRNA2T00046046001:promoter
chrA02	23868800	23869300	500	hyper	93	11	43	131	89.42	24.71	3.0936e-09	5	8	GSBRNA2T00046046001:promoter,GSBRNA2T00046046001:exon
chrA02	23923200	23923700	500	hyper	33	66	0	103	33.33	0	4.4181e-08	11	8	GSBRNA2T00046056001:promoter
chrA02	23923200	23923700	500	hyper	33	66	0	103	33.33	0	4.4181e-08	11	8	GSBRNA2T00046056001:promoter,GSBRNA2T00046056001:exon
chrA02	24647000	24648000	1000	hyper	184	56	6	160	76.67	3.61	2.7185e-21	19	19	GSBRNA2T00004976001:exon
chrA02	24649400	24649900	500	hyper	121	49	19	46	71.18	29.23	0.0015505	10	7	GSBRNA2T00004976001:promoter
chrA02	24649400	24649900	500	hyper	121	49	19	46	71.18	29.23	0.0015505	10	7	GSBRNA2T00004976001:promoter
chrA02	24693500	24694000	500	hyper	55	27	2	58	67.07	3.33	9.5348e-08	8	5	GSBRNA2T00004986001:promoter,GSBRNA2T00004987001:promoter
chrA02	24693500	24694000	500	hyper	55	27	2	58	67.07	3.33	9.5348e-08	8	5	GSBRNA2T00004986001:promoter,GSBRNA2T00004987001:promoter
chrA02_random	108400	108900	500	hyper	53	34	0	44	60.92	0	1.3183e-06	8	5	GSBRNA2T00025192001:promoter
chrA02_random	108400	108900	500	hyper	53	34	0	44	60.92	0	1.3183e-06	8	5	GSBRNA2T00025192001:promoter
chrA02_random	377900	378400	500	hyper	27	19	5	45	58.7	10	0.00030854	5	6	GSBRNA2T00046665001:promoter
chrA02_random	377900	378400	500	hyper	27	19	5	45	58.7	10	0.00030854	5	6	GSBRNA2T00046665001:promoter
chrA02_random	485100	485600	500	hyper	15	15	0	73	50	0	1.2928e-07	5	6	GSBRNA2T00017801001:promoter
chrA02_random	485100	485600	500	hyper	15	15	0	73	50	0	1.2928e-07	5	6	GSBRNA2T00017801001:promoter
chrA02_random	707400	707900	500	hyper	50	42	0	60	54.35	0	1.1662e-07	9	6	GSBRNA2T00020087001:promoter
chrA02_random	707400	707900	500	hyper	50	42	0	60	54.35	0	1.1662e-07	9	6	GSBRNA2T00020087001:promoter
chrA02_random	710700	711200	500	hyper	132	23	13	35	85.16	27.08	0.00038395	13	8	GSBRNA2T00020088001:promoter
chrA02_random	710700	711200	500	hyper	132	23	13	35	85.16	27.08	0.00038395	13	8	GSBRNA2T00020088001:promoter,GSBRNA2T00020087001:exon,GSBRNA2T00020087001:exon,GSBRNA2T00020088001:exon
chrA02_random	731100	731600	500	hyper	51	12	22	57	80.95	27.85	0.0003892	5	5	GSBRNA2T00020092001:promoter
chrA02_random	731100	731600	500	hyper	51	12	22	57	80.95	27.85	0.0003892	5	5	GSBRNA2T00020092001:promoter
chrA02_random	738700	739200	500	hyper	141	22	57	65	86.5	46.72	0.0017038	11	10	GSBRNA2T00020094001:promoter,GSBRNA2T00020093001:promoter
chrA02_random	738700	739200	500	hyper	141	22	57	65	86.5	46.72	0.0017038	11	10	GSBRNA2T00020094001:promoter,GSBRNA2T00020093001:promoter
chrA02_random	829400	830400	1000	hyper	124	32	8	95	79.49	7.77	2.7372e-12	13	16	GSBRNA2T00057706001:promoter,GSBRNA2T00057705001:promoter
chrA02_random	829400	830400	1000	hyper	124	32	8	95	79.49	7.77	2.7372e-12	13	16	GSBRNA2T00057706001:promoter,GSBRNA2T00057705001:promoter,GSBRNA2T00057706001:exon,GSBRNA2T00057706001:exon,GSBRNA2T00057706001:exon
chrA02_random	1134400	1134900	500	hyper	52	10	15	44	83.87	25.42	0.00039295	5	9	GSBRNA2T00060493001:promoter
chrA02_random	1134400	1134900	500	hyper	52	10	15	44	83.87	25.42	0.00039295	5	9	GSBRNA2T00060493001:promoter
chrA02_random	1135900	1136400	500	hyper	91	12	1	72	88.35	1.37	2.1828e-12	6	8	GSBRNA2T00063570001:promoter
chrA02_random	1135900	1136400	500	hyper	91	12	1	72	88.35	1.37	2.1828e-12	6	8	GSBRNA2T00063570001:promoter
chrA02_random	1166700	1167200	500	hyper	68	5	25	41	93.15	37.88	0.0016357	7	7	GSBRNA2T00081481001:promoter
chrA02_random	1166700	1167200	500	hyper	68	5	25	41	93.15	37.88	0.0016357	7	7	GSBRNA2T00081481001:promoter
chrA02_random	1173900	1174400	500	hyper	35	87	1	123	28.69	0.81	7.7487e-08	10	9	GSBRNA2T00083453001:exon,GSBRNA2T00083453001:exon,GSBRNA2T00083453001:exon
chrA02_random	1311300	1312300	1000	hyper	286	41	153	214	87.46	41.69	2.971e-09	24	35	GSBRNA2T00084085001:promoter
chrA02_random	1311300	1312300	1000	hyper	286	41	153	214	87.46	41.69	2.971e-09	24	35	GSBRNA2T00084085001:promoter,GSBRNA2T00084085001:exon,GSBRNA2T00084085001:exon
chrA02_random	1351000	1351500	500	hyper	54	5	14	29	91.53	32.56	0.0035198	6	6	GSBRNA2T00084091001:promoter
chrA02_random	1351000	1351500	500	hyper	54	5	14	29	91.53	32.56	0.0035198	6	6	GSBRNA2T00084091001:promoter
chrA02_random	1368000	1368500	500	hyper	78	14	2	45	84.78	4.26	8.6045e-08	8	7	GSBRNA2T00084092001:exon
chrA02_random	1418500	1419000	500	hyper	39	47	0	76	45.35	0	5.826e-08	5	5	GSBRNA2T00055666001:promoter
chrA02_random	1418500	1419000	500	hyper	39	47	0	76	45.35	0	5.826e-08	5	5	GSBRNA2T00055666001:promoter
chrA02_random	1450800	1451300	500	hyper	49	5	50	69	90.74	42.02	0.0027839	7	12	GSBRNA2T00062906001:exon
chrA02_random	1520700	1521200	500	hyper	22	15	0	25	59.46	0	0.00037964	6	5	GSBRNA2T00011742001:promoter
chrA02_random	1520700	1521200	500	hyper	22	15	0	25	59.46	0	0.00037964	6	5	GSBRNA2T00011742001:promoter
chrA03	298200	298700	500	hyper	84	41	0	60	67.2	0	3.19e-09	9	7	GSBRNA2T00049253001:promoter,GSBRNA2T00049254001:promoter
chrA03	298200	298700	500	hyper	84	41	0	60	67.2	0	3.19e-09	9	7	GSBRNA2T00049253001:promoter,GSBRNA2T00049254001:promoter
chrA03	343200	343700	500	hyper	83	53	0	36	61.03	0	6.8747e-06	11	5	GSBRNA2T00049267001:promoter
chrA03	343200	343700	500	hyper	83	53	0	36	61.03	0	6.8747e-06	11	5	GSBRNA2T00049267001:promoter
chrA03	564000	564500	500	hyper	34	64	5	48	34.69	9.43	0.0070743	12	7	GSBRNA2T00049316001:intron
chrA03	709700	710200	500	hyper	24	8	0	33	75	0	1.0798e-05	5	5	GSBRNA2T00049365001:promoter
chrA03	709700	710200	500	hyper	24	8	0	33	75	0	1.0798e-05	5	5	GSBRNA2T00049365001:promoter
chrA03	882500	883000	500	hyper	57	42	0	64	57.58	0	1.9317e-08	8	7	GSBRNA2T00049406001:promoter
chrA03	882500	883000	500	hyper	57	42	0	64	57.58	0	1.9317e-08	8	7	GSBRNA2T00049406001:promoter,GSBRNA2T00049406001:exon,GSBRNA2T00049406001:exon,GSBRNA2T00049406001:exon
chrA03	969400	969900	500	hyper	40	11	9	33	78.43	21.43	0.001557	5	5	GSBRNA2T00129651001:promoter
chrA03	969400	969900	500	hyper	40	11	9	33	78.43	21.43	0.001557	5	5	GSBRNA2T00129651001:promoter
chrA03	976900	977400	500	hyper	38	47	0	87	44.71	0	1.013e-08	5	8	GSBRNA2T00129654001:exon
chrA03	1690300	1690800	500	hyper	131	11	76	76	92.25	50	0.00091088	10	11	GSBRNA2T00129825001:promoter,GSBRNA2T00129826001:promoter
chrA03	1690300	1690800	500	hyper	131	11	76	76	92.25	50	0.00091088	10	11	GSBRNA2T00129825001:promoter,GSBRNA2T00129826001:promoter
chrA03	1725300	1725800	500	hyper	49	114	4	76	30.06	5	0.00020513	15	7	GSBRNA2T00129839001:promoter,GSBRNA2T00129838001:promoter
chrA03	1725300	1725800	500	hyper	49	114	4	76	30.06	5	0.00020513	15	7	GSBRNA2T00129839001:promoter,GSBRNA2T00129838001:promoter
chrA03	1792900	1793400	500	hyper	31	2	0	29	93.94	0	4.4273e-06	5	5	GSBRNA2T00129859001:promoter,GSBRNA2T00129860001:promoter
chrA03	1792900	1793400	500	hyper	31	2	0	29	93.94	0	4.4273e-06	5	5	GSBRNA2T00129859001:promoter,GSBRNA2T00129860001:promoter
chrA03	1825400	1825900	500	hyper	17	29	0	32	36.96	0	0.0011829	8	5	GSBRNA2T00129871001:promoter
chrA03	1825400	1825900	500	hyper	17	29	0	32	36.96	0	0.0011829	8	5	GSBRNA2T00129871001:promoter,GSBRNA2T00129872001:exon,GSBRNA2T00129872001:exon
chrA03	1828800	1829300	500	hyper	74	6	15	27	92.5	35.71	0.0045272	7	7	GSBRNA2T00129872001:promoter
chrA03	1828800	1829300	500	hyper	74	6	15	27	92.5	35.71	0.0045272	7	7	GSBRNA2T00129872001:promoter,GSBRNA2T00129873001:exon
chrA03	1830900	1831400	500	hyper	47	52	1	41	47.47	2.38	7.6696e-05	5	5	GSBRNA2T00129873001:promoter
chrA03	1830900	1831400	500	hyper	47	52	1	41	47.47	2.38	7.6696e-05	5	5	GSBRNA2T00129873001:promoter
chrA03	1998900	1999400	500	hyper	111	15	0	72	88.1	0	4.0351e-13	7	6	GSBRNA2T00129917001:promoter
chrA03	1998900	1999400	500	hyper	111	15	0	72	88.1	0	4.0351e-13	7	6	GSBRNA2T00129917001:promoter
chrA03	2024600	2025600	1000	hyper	298	52	46	241	85.14	16.03	1.5246e-23	20	19	GSBRNA2T00129922001:promoter
chrA03	2024600	2025600	1000	hyper	298	52	46	241	85.14	16.03	1.5246e-23	20	19	GSBRNA2T00129922001:promoter
chrA03	2126700	2127200	500	hyper	35	4	0	26	89.74	0	1.3639e-05	5	5	GSBRNA2T00129946001:promoter
chrA03	2126700	2127200	500	hyper	35	4	0	26	89.74	0	1.3639e-05	5	5	GSBRNA2T00129946001:promoter
chrA03	2380900	2381400	500	hyper	34	22	2	33	60.71	5.71	0.00023495	7	5	GSBRNA2T00130018001:exon,GSBRNA2T00130018001:exon,GSBRNA2T00130018001:exon
chrA03	2411200	2412200	1000	hyper	207	62	19	582	76.95	3.16	2.0679e-60	30	37	GSBRNA2T00130024001:promoter
chrA03	2411200	2412200	1000	hyper	207	62	19	582	76.95	3.16	2.0679e-60	30	37	GSBRNA2T00130024001:promoter,GSBRNA2T00130024001:exon,GSBRNA2T00130024001:exon
chrA03	2708400	2709400	1000	hyper	215	85	9	180	71.67	4.76	9.2892e-22	12	15	GSBRNA2T00130107001:promoter,GSBRNA2T00130106001:promoter
chrA03	2708400	2709400	1000	hyper	215	85	9	180	71.67	4.76	9.2892e-22	12	15	GSBRNA2T00130107001:promoter,GSBRNA2T00130106001:promoter,GSBRNA2T00130108001:exon,GSBRNA2T00130108001:exon
chrA03	2796800	2797300	500	hyper	94	20	1	67	82.46	1.47	3.2902e-11	7	7	GSBRNA2T00130138001:promoter
chrA03	2796800	2797300	500	hyper	94	20	1	67	82.46	1.47	3.2902e-11	7	7	GSBRNA2T00130138001:promoter,GSBRNA2T00130137001:exon,GSBRNA2T00130137001:exon
chrA03	2799600	2800100	500	hyper	94	37	0	44	71.76	0	1.0628e-07	11	8	GSBRNA2T00130139001:promoter
chrA03	2799600	2800100	500	hyper	94	37	0	44	71.76	0	1.0628e-07	11	8	GSBRNA2T00130139001:promoter
chrA03	2802000	2802500	500	hyper	68	4	0	47	94.44	0	2.1056e-09	7	5	GSBRNA2T00130139001:exon
chrA03	2851300	2851800	500	hyper	91	72	0	49	55.83	0	5.47e-07	11	8	GSBRNA2T00130154001:promoter
chrA03	2851300	2851800	500	hyper	91	72	0	49	55.83	0	5.47e-07	11	8	GSBRNA2T00130154001:promoter,GSBRNA2T00130155001:exon,GSBRNA2T00130155001:exon
chrA03	3011700	3012200	500	hyper	37	53	3	227	41.11	1.3	9.489e-16	6	7	GSBRNA2T00130198001:promoter
chrA03	3011700	3012200	500	hyper	37	53	3	227	41.11	1.3	9.489e-16	6	7	GSBRNA2T00130198001:promoter
chrA03	3702900	3703400	500	hyper	31	22	0	81	58.49	0	1.3033e-09	5	10	GSBRNA2T00148910001:promoter
chrA03	3702900	3703400	500	hyper	31	22	0	81	58.49	0	1.3033e-09	5	10	GSBRNA2T00148910001:promoter
chrA03	3898600	3899100	500	hyper	51	27	0	59	65.38	0	1.5347e-08	11	8	GSBRNA2T00148848001:promoter
chrA03	3898600	3899100	500	hyper	51	27	0	59	65.38	0	1.5347e-08	11	8	GSBRNA2T00148848001:promoter,GSBRNA2T00148848001:exon
chrA03	3925200	3925700	500	hyper	132	6	100	70	95.65	58.82	0.0054057	14	18	GSBRNA2T00148844001:promoter,GSBRNA2T00148842001:promoter
chrA03	3925200	3925700	500	hyper	132	6	100	70	95.65	58.82	0.0054057	14	18	GSBRNA2T00148844001:promoter,GSBRNA2T00148842001:promoter
chrA03	3971900	3972400	500	hyper	39	31	6	47	55.71	11.32	0.00034613	10	9	GSBRNA2T00148832001:exon,GSBRNA2T00148832001:exon
chrA03	4456000	4456500	500	hyper	36	62	0	50	36.73	0	4.3774e-05	10	5	GSBRNA2T00148705001:promoter
chrA03	4456000	4456500	500	hyper	36	62	0	50	36.73	0	4.3774e-05	10	5	GSBRNA2T00148705001:promoter,GSBRNA2T00148704001:exon,GSBRNA2T00148704001:exon
chrA03	4457900	4458900	1000	hyper	77	90	0	92	46.11	0	8.4035e-10	14	15	GSBRNA2T00148704001:promoter
chrA03	4457900	4458900	1000	hyper	77	90	0	92	46.11	0	8.4035e-10	14	15	GSBRNA2T00148704001:promoter,GSBRNA2T00148704001:exon,GSBRNA2T00148704001:exon,GSBRNA2T00148704001:exon
chrA03	4460000	4460500	500	hyper	62	26	20	80	70.45	20	1.1885e-05	10	10	GSBRNA2T00148703001:promoter,GSBRNA2T00148704001:promoter
chrA03	4460000	4460500	500	hyper	62	26	20	80	70.45	20	1.1885e-05	10	10	GSBRNA2T00148703001:promoter,GSBRNA2T00148704001:promoter
chrA03	4510300	4510800	500	hyper	55	52	0	31	51.4	0	0.00012476	9	5	GSBRNA2T00148682001:promoter
chrA03	4510300	4510800	500	hyper	55	52	0	31	51.4	0	0.00012476	9	5	GSBRNA2T00148682001:promoter,GSBRNA2T00148682001:exon
chrA03	4745100	4745600	500	hyper	22	27	0	26	44.9	0	0.0012469	7	5	GSBRNA2T00148631001:promoter,GSBRNA2T00148630001:promoter
chrA03	4745100	4745600	500	hyper	22	27	0	26	44.9	0	0.0012469	7	5	GSBRNA2T00148631001:promoter,GSBRNA2T00148630001:promoter
chrA03	4790000	4790500	500	hyper	43	27	0	63	61.43	0	1.7769e-08	7	7	GSBRNA2T00148624001:promoter
chrA03	4790000	4790500	500	hyper	43	27	0	63	61.43	0	1.7769e-08	7	7	GSBRNA2T00148624001:promoter
chrA03	4935900	4936400	500	hyper	52	5	26	38	91.23	40.62	0.0068028	5	5	GSBRNA2T00062622001:promoter
chrA03	4935900	4936400	500	hyper	52	5	26	38	91.23	40.62	0.0068028	5	5	GSBRNA2T00062622001:promoter
chrA03	5006800	5007800	1000	hyper	57	49	0	85	53.77	0	5.2168e-10	14	13	GSBRNA2T00062604001:promoter,GSBRNA2T00062603001:promoter
chrA03	5006800	5007800	1000	hyper	57	49	0	85	53.77	0	5.2168e-10	14	13	GSBRNA2T00062604001:promoter,GSBRNA2T00062603001:promoter
chrA03	5063200	5063700	500	hyper	45	145	0	94	23.68	0	4.9614e-06	18	15	GSBRNA2T00062586001:exon,GSBRNA2T00062586001:exon,GSBRNA2T00062586001:exon
chrA03	5176200	5176700	500	hyper	89	23	0	40	79.46	0	1.1628e-07	16	7	GSBRNA2T00062549001:promoter
chrA03	5176200	5176700	500	hyper	89	23	0	40	79.46	0	1.1628e-07	16	7	GSBRNA2T00062549001:promoter
chrA03	5343000	5343500	500	hyper	80	53	11	111	60.15	9.02	1.7507e-09	6	6	GSBRNA2T00075864001:promoter
chrA03	5343000	5343500	500	hyper	80	53	11	111	60.15	9.02	1.7507e-09	6	6	GSBRNA2T00075864001:promoter
chrA03	5546100	5546600	500	hyper	18	47	0	65	27.69	0	6.1751e-05	9	10	GSBRNA2T00086693001:exon
chrA03	5605800	5606300	500	hyper	101	48	0	29	67.79	0	1.8249e-05	16	5	GSBRNA2T00086680001:promoter
chrA03	5605800	5606300	500	hyper	101	48	0	29	67.79	0	1.8249e-05	16	5	GSBRNA2T00086680001:promoter
chrA03	5657800	5658300	500	hyper	26	31	0	64	45.61	0	8.0074e-07	8	8	GSBRNA2T00041136001:promoter
chrA03	5657800	5658300	500	hyper	26	31	0	64	45.61	0	8.0074e-07	8	8	GSBRNA2T00041136001:promoter
chrA03	5678600	5679100	500	hyper	26	40	0	59	39.39	0	7.1897e-06	5	6	GSBRNA2T00041141001:exon
chrA03	5686500	5687000	500	hyper	19	36	0	35	34.55	0	0.00097018	7	5	GSBRNA2T00041143001:promoter
chrA03	5686500	5687000	500	hyper	19	36	0	35	34.55	0	0.00097018	7	5	GSBRNA2T00041143001:promoter
chrA03	5745900	5746400	500	hyper	14	39	0	82	26.42	0	1.3694e-05	9	10	GSBRNA2T00017881001:promoter
chrA03	5745900	5746400	500	hyper	14	39	0	82	26.42	0	1.3694e-05	9	10	GSBRNA2T00017881001:promoter
chrA03	5965500	5966000	500	hyper	53	13	0	26	80.3	0	1.9364e-05	5	5	GSBRNA2T00066706001:promoter
chrA03	5965500	5966000	500	hyper	53	13	0	26	80.3	0	1.9364e-05	5	5	GSBRNA2T00066706001:promoter
chrA03	6008300	6009300	1000	hyper	103	59	0	160	63.58	0	1.306e-19	11	11	GSBRNA2T00066698001:promoter
chrA03	6008300	6009300	1000	hyper	103	59	0	160	63.58	0	1.306e-19	11	11	GSBRNA2T00066698001:promoter
chrA03	6225200	6225700	500	hyper	44	37	0	48	54.32	0	1.9345e-06	5	6	GSBRNA2T00142191001:promoter
chrA03	6225200	6225700	500	hyper	44	37	0	48	54.32	0	1.9345e-06	5	6	GSBRNA2T00142191001:promoter
chrA03	6226000	6226500	500	hyper	67	23	5	59	74.44	7.81	1.4056e-07	9	7	GSBRNA2T00142189001:promoter
chrA03	6226000	6226500	500	hyper	67	23	5	59	74.44	7.81	1.4056e-07	9	7	GSBRNA2T00142189001:promoter
chrA03	6226600	6227100	500	hyper	30	47	0	50	38.96	0	3.1416e-05	6	6	GSBRNA2T00142189001:promoter,GSBRNA2T00142190001:promoter
chrA03	6226600	6227100	500	hyper	30	47	0	50	38.96	0	3.1416e-05	6	6	GSBRNA2T00142189001:promoter,GSBRNA2T00142190001:promoter,GSBRNA2T00142190001:exon
chrA03	6237500	6238500	1000	hyper	226	162	2	199	58.25	1	5.9327e-23	27	25	GSBRNA2T00142187001:promoter
chrA03	6237500	6238500	1000	hyper	226	162	2	199	58.25	1	5.9327e-23	27	25	GSBRNA2T00142187001:promoter
chrA03	6510000	6510500	500	hyper	66	49	0	43	57.39	0	2.4196e-06	13	6	GSBRNA2T00142113001:promoter
chrA03	6510000	6510500	500	hyper	66	49	0	43	57.39	0	2.4196e-06	13	6	GSBRNA2T00142113001:promoter
chrA03	6556500	6558200	1700	hyper	125	94	0	128	57.08	0	1.8055e-15	19	18	GSBRNA2T00142100001:promoter
chrA03	6556500	6558200	1700	hyper	125	94	0	128	57.08	0	1.8055e-15	19	18	GSBRNA2T00142100001:promoter
chrA03	6585600	6586100	500	hyper	32	117	0	100	21.48	0	7.9426e-06	12	12	GSBRNA2T00142092001:exon
chrA03	6715300	6716300	1000	hyper	236	26	1	203	90.08	0.49	6.0296e-33	17	15	GSBRNA2T00142057001:promoter
chrA03	6715300	6716300	1000	hyper	236	26	1	203	90.08	0.49	6.0296e-33	17	15	GSBRNA2T00142057001:promoter,GSBRNA2T00142058001:exon
chrA03	6842500	6844000	1500	hyper	364	35	0	212	91.23	0	5.6234e-37	21	19	GSBRNA2T00142036001:promoter
chrA03	6842500	6844000	1500	hyper	364	35	0	212	91.23	0	5.6234e-37	21	19	GSBRNA2T00142036001:promoter
chrA03	7075600	7076600	1000	hyper	78	49	4	113	61.42	3.42	2.8559e-12	14	11	GSBRNA2T00141987001:promoter
chrA03	7075600	7076600	1000	hyper	78	49	4	113	61.42	3.42	2.8559e-12	14	11	GSBRNA2T00141987001:promoter,GSBRNA2T00141987001:exon
chrA03	7199600	7200100	500	hyper	42	35	2	70	54.55	2.78	1.5418e-07	5	5	GSBRNA2T00141951001:promoter
chrA03	7199600	7200100	500	hyper	42	35	2	70	54.55	2.78	1.5418e-07	5	5	GSBRNA2T00141951001:promoter
chrA03	7253200	7253700	500	hyper	66	8	80	78	89.19	50.63	0.0090835	7	16	GSBRNA2T00141939001:promoter,GSBRNA2T00141938001:promoter,GSBRNA2T00141937001:promoter
chrA03	7253200	7253700	500	hyper	66	8	80	78	89.19	50.63	0.0090835	7	16	GSBRNA2T00141939001:promoter,GSBRNA2T00141938001:promoter,GSBRNA2T00141937001:promoter
chrA03	7310200	7310700	500	hyper	106	34	37	57	75.71	39.36	0.0046741	10	8	GSBRNA2T00141923001:promoter,GSBRNA2T00141924001:promoter
chrA03	7310200	7310700	500	hyper	106	34	37	57	75.71	39.36	0.0046741	10	8	GSBRNA2T00141923001:promoter,GSBRNA2T00141924001:promoter
chrA03	7354900	7355400	500	hyper	112	138	2	132	44.8	1.49	3.0811e-12	5	5	GSBRNA2T00141913001:exon
chrA03	7705700	7706200	500	hyper	114	57	0	95	66.67	0	1.7336e-13	13	8	GSBRNA2T00141839001:promoter
chrA03	7705700	7706200	500	hyper	114	57	0	95	66.67	0	1.7336e-13	13	8	GSBRNA2T00141839001:promoter
chrA03	7722800	7723300	500	hyper	94	28	14	44	77.05	24.14	0.000258	10	8	GSBRNA2T00141833001:promoter
chrA03	7722800	7723300	500	hyper	94	28	14	44	77.05	24.14	0.000258	10	8	GSBRNA2T00141833001:promoter
chrA03	7772900	7773400	500	hyper	123	23	0	83	84.25	0	2.2094e-14	5	5	GSBRNA2T00141815001:promoter
chrA03	7772900	7773400	500	hyper	123	23	0	83	84.25	0	2.2094e-14	5	5	GSBRNA2T00141815001:promoter
chrA03	7966700	7967200	500	hyper	38	59	0	70	39.18	0	8.7412e-07	13	6	GSBRNA2T00086079001:promoter
chrA03	7966700	7967200	500	hyper	38	59	0	70	39.18	0	8.7412e-07	13	6	GSBRNA2T00086079001:promoter
chrA03	8118300	8118800	500	hyper	47	2	1	70	95.92	1.41	1.4363e-11	7	8	GSBRNA2T00124913001:intron
chrA03	8264700	8265200	500	hyper	47	34	0	51	58.02	0	4.6728e-07	7	5	GSBRNA2T00124880001:promoter
chrA03	8264700	8265200	500	hyper	47	34	0	51	58.02	0	4.6728e-07	7	5	GSBRNA2T00124880001:promoter
chrA03	8277900	8278400	500	hyper	283	6	0	74	97.92	0	6.9231e-16	18	6	GSBRNA2T00124878001:intron
chrA03	8405400	8405900	500	hyper	75	108	0	42	40.98	0	5.4664e-05	14	6	GSBRNA2T00124856001:promoter,GSBRNA2T00124855001:promoter
chrA03	8405400	8405900	500	hyper	75	108	0	42	40.98	0	5.4664e-05	14	6	GSBRNA2T00124856001:promoter,GSBRNA2T00124855001:promoter,GSBRNA2T00124854001:exon
chrA03	8411400	8411900	500	hyper	22	56	0	58	28.21	0	0.00011802	7	6	GSBRNA2T00124851001:promoter
chrA03	8411400	8411900	500	hyper	22	56	0	58	28.21	0	0.00011802	7	6	GSBRNA2T00124851001:promoter,GSBRNA2T00124852001:exon
chrA03	8440700	8441200	500	hyper	38	20	8	66	65.52	10.81	5.8689e-06	9	12	GSBRNA2T00124841001:promoter,GSBRNA2T00124842001:promoter
chrA03	8440700	8441200	500	hyper	38	20	8	66	65.52	10.81	5.8689e-06	9	12	GSBRNA2T00124841001:promoter,GSBRNA2T00124842001:promoter
chrA03	8715300	8715800	500	hyper	30	19	1	26	61.22	3.7	0.00056427	6	5	GSBRNA2T00124772001:promoter
chrA03	8715300	8715800	500	hyper	30	19	1	26	61.22	3.7	0.00056427	6	5	GSBRNA2T00124772001:promoter
chrA03	8926000	8926500	500	hyper	48	34	0	68	58.54	0	8.5661e-09	5	8	GSBRNA2T00124718001:promoter
chrA03	8926000	8926500	500	hyper	48	34	0	68	58.54	0	8.5661e-09	5	8	GSBRNA2T00124718001:promoter,GSBRNA2T00124719001:exon
chrA03	9026600	9027100	500	hyper	61	79	1	118	43.57	0.84	9.1161e-11	9	8	GSBRNA2T00124701001:promoter
chrA03	9026600	9027100	500	hyper	61	79	1	118	43.57	0.84	9.1161e-11	9	8	GSBRNA2T00124701001:promoter
chrA03	9168800	9169300	500	hyper	61	10	11	48	85.92	18.64	1.6572e-05	5	5	GSBRNA2T00058417001:promoter
chrA03	9168800	9169300	500	hyper	61	10	11	48	85.92	18.64	1.6572e-05	5	5	GSBRNA2T00058417001:promoter
chrA03	9198700	9199200	500	hyper	72	8	15	66	90	18.52	3.3558e-07	5	5	GSBRNA2T00058408001:promoter
chrA03	9198700	9199200	500	hyper	72	8	15	66	90	18.52	3.3558e-07	5	5	GSBRNA2T00058408001:promoter
chrA03	9399400	9399900	500	hyper	95	43	0	33	68.84	0	4.764e-06	21	5	GSBRNA2T00058359001:promoter
chrA03	9399400	9399900	500	hyper	95	43	0	33	68.84	0	4.764e-06	21	5	GSBRNA2T00058359001:promoter
chrA03	9546300	9546800	500	hyper	32	57	0	49	35.96	0	6.4573e-05	9	9	GSBRNA2T00139091001:promoter
chrA03	9546300	9546800	500	hyper	32	57	0	49	35.96	0	6.4573e-05	9	9	GSBRNA2T00139091001:promoter
chrA03	9547300	9547800	500	hyper	22	5	1	69	81.48	1.43	2.6959e-09	5	8	GSBRNA2T00139091001:promoter
chrA03	9547300	9547800	500	hyper	22	5	1	69	81.48	1.43	2.6959e-09	5	8	GSBRNA2T00139091001:promoter
chrA03	9680500	9681000	500	hyper	115	23	14	27	83.33	34.15	0.0064352	16	6	GSBRNA2T00139052001:promoter
chrA03	9680500	9681000	500	hyper	115	23	14	27	83.33	34.15	0.0064352	16	6	GSBRNA2T00139052001:promoter
chrA03	10144400	10144900	500	hyper	41	15	0	56	73.21	0	1.2975e-08	6	7	GSBRNA2T00138934001:intron
chrA03	10171200	10171700	500	hyper	118	64	0	60	64.84	0	3.1201e-09	16	6	GSBRNA2T00138925001:promoter
chrA03	10171200	10171700	500	hyper	118	64	0	60	64.84	0	3.1201e-09	16	6	GSBRNA2T00138925001:promoter,GSBRNA2T00138925001:exon
chrA03	10172000	10173000	1000	hyper	145	8	0	96	94.77	0	8.1644e-18	15	10	GSBRNA2T00138924001:exon,GSBRNA2T00138924001:exon
chrA03	10173800	10174300	500	hyper	43	4	7	19	91.49	26.92	0.0078677	5	5	GSBRNA2T00138924001:promoter
chrA03	10173800	10174300	500	hyper	43	4	7	19	91.49	26.92	0.0078677	5	5	GSBRNA2T00138924001:promoter,GSBRNA2T00138923001:exon
chrA03	10175000	10175500	500	hyper	36	2	0	47	94.74	0	1.1624e-08	5	5	GSBRNA2T00138923001:promoter,GSBRNA2T00138924001:promoter
chrA03	10175000	10175500	500	hyper	36	2	0	47	94.74	0	1.1624e-08	5	5	GSBRNA2T00138923001:promoter,GSBRNA2T00138924001:promoter,GSBRNA2T00138923001:exon
chrA03	10240900	10241400	500	hyper	41	81	0	82	33.61	0	6.4557e-07	13	11	GSBRNA2T00138906001:promoter,GSBRNA2T00138908001:promoter
chrA03	10240900	10241400	500	hyper	41	81	0	82	33.61	0	6.4557e-07	13	11	GSBRNA2T00138906001:promoter,GSBRNA2T00138908001:promoter
chrA03	10277500	10278000	500	hyper	45	3	22	57	93.75	27.85	9.8861e-05	6	7	GSBRNA2T00138895001:promoter
chrA03	10277500	10278000	500	hyper	45	3	22	57	93.75	27.85	9.8861e-05	6	7	GSBRNA2T00138895001:promoter
chrA03	10441700	10442700	1000	hyper	131	166	0	185	44.11	0	2.1375e-17	20	16	GSBRNA2T00138857001:promoter
chrA03	10441700	10442700	1000	hyper	131	166	0	185	44.11	0	2.1375e-17	20	16	GSBRNA2T00138857001:promoter
chrA03	10464900	10466300	1400	hyper	162	28	8	86	85.26	8.51	2.2944e-12	22	14	GSBRNA2T00138852001:promoter
chrA03	10464900	10466300	1400	hyper	162	28	8	86	85.26	8.51	2.2944e-12	22	14	GSBRNA2T00138852001:promoter
chrA03	10553700	10554200	500	hyper	41	19	0	71	68.33	0	7.6699e-10	6	5	GSBRNA2T00138836001:exon,GSBRNA2T00138836001:exon,GSBRNA2T00138836001:exon
chrA03	10578500	10579000	500	hyper	39	74	11	82	34.51	11.83	0.0027962	10	13	GSBRNA2T00138831001:promoter
chrA03	10578500	10579000	500	hyper	39	74	11	82	34.51	11.83	0.0027962	10	13	GSBRNA2T00138831001:promoter,GSBRNA2T00138831001:exon
chrA03	10656300	10657900	1600	hyper	403	30	6	168	93.07	3.45	8.4273e-29	35	19	GSBRNA2T00138813001:promoter,GSBRNA2T00138812001:promoter
chrA03	10656300	10657900	1600	hyper	403	30	6	168	93.07	3.45	8.4273e-29	35	19	GSBRNA2T00138813001:promoter,GSBRNA2T00138812001:promoter
chrA03	10816400	10816900	500	hyper	41	0	4	38	100	9.52	2.6512e-06	5	6	GSBRNA2T00138780001:promoter
chrA03	10816400	10816900	500	hyper	41	0	4	38	100	9.52	2.6512e-06	5	6	GSBRNA2T00138780001:promoter
chrA03	10839600	10840100	500	hyper	100	44	0	39	69.44	0	6.6368e-07	8	6	GSBRNA2T00138773001:promoter,GSBRNA2T00138772001:promoter
chrA03	10839600	10840100	500	hyper	100	44	0	39	69.44	0	6.6368e-07	8	6	GSBRNA2T00138773001:promoter,GSBRNA2T00138772001:promoter
chrA03	10957000	10957500	500	hyper	42	68	0	50	38.18	0	2.9614e-05	10	6	GSBRNA2T00138749001:intron
chrA03	11009700	11010200	500	hyper	77	93	2	80	45.29	2.44	8.9017e-08	10	9	GSBRNA2T00138735001:promoter,GSBRNA2T00138736001:promoter
chrA03	11009700	11010200	500	hyper	77	93	2	80	45.29	2.44	8.9017e-08	10	9	GSBRNA2T00138735001:promoter,GSBRNA2T00138736001:promoter
chrA03	11195600	11196100	500	hyper	34	51	0	124	40	0	1.3798e-10	6	12	GSBRNA2T00138693001:promoter
chrA03	11195600	11196100	500	hyper	34	51	0	124	40	0	1.3798e-10	6	12	GSBRNA2T00138693001:promoter,GSBRNA2T00138694001:exon,GSBRNA2T00138694001:exon
chrA03	11367800	11368300	500	hyper	48	159	2	99	23.19	1.98	3.0265e-05	14	10	GSBRNA2T00138657001:exon
chrA03	11375300	11375800	500	hyper	40	83	8	140	32.52	5.41	1.2509e-06	16	13	GSBRNA2T00151361001:promoter
chrA03	11375300	11375800	500	hyper	40	83	8	140	32.52	5.41	1.2509e-06	16	13	GSBRNA2T00151361001:promoter
chrA03	11700700	11701200	500	hyper	106	8	35	60	92.98	36.84	8.9262e-05	5	5	GSBRNA2T00151448001:promoter
chrA03	11700700	11701200	500	hyper	106	8	35	60	92.98	36.84	8.9262e-05	5	5	GSBRNA2T00151448001:promoter
chrA03	11827600	11828100	500	hyper	84	29	0	47	74.34	0	3.2338e-08	15	6	GSBRNA2T00151472001:exon,GSBRNA2T00151472001:exon
chrA03	11840800	11841800	1000	hyper	79	89	0	140	47.02	0	6.3416e-14	23	20	GSBRNA2T00151476001:promoter
chrA03	11840800	11841800	1000	hyper	79	89	0	140	47.02	0	6.3416e-14	23	20	GSBRNA2T00151476001:promoter
chrA03	12067900	12069500	1600	hyper	119	133	26	175	47.22	12.94	1.1292e-08	30	27	GSBRNA2T00151529001:exon
chrA03	12082300	12083900	1600	hyper	109	37	28	117	74.66	19.31	7.4638e-09	15	11	GSBRNA2T00151533001:promoter
chrA03	12082300	12083900	1600	hyper	109	37	28	117	74.66	19.31	7.4638e-09	15	11	GSBRNA2T00151533001:promoter,GSBRNA2T00151535001:exon
chrA03	12113200	12113700	500	hyper	44	57	0	63	43.56	0	8.4772e-07	7	5	GSBRNA2T00151540001:promoter
chrA03	12113200	12113700	500	hyper	44	57	0	63	43.56	0	8.4772e-07	7	5	GSBRNA2T00151540001:promoter
chrA03	12147000	12147500	500	hyper	160	25	19	50	86.49	27.54	2.5022e-05	12	7	GSBRNA2T00151544001:promoter
chrA03	12147000	12147500	500	hyper	160	25	19	50	86.49	27.54	2.5022e-05	12	7	GSBRNA2T00151544001:promoter
chrA03	12263700	12264700	1000	hyper	119	18	34	96	86.86	26.15	8.7753e-08	11	12	GSBRNA2T00151575001:promoter
chrA03	12263700	12264700	1000	hyper	119	18	34	96	86.86	26.15	8.7753e-08	11	12	GSBRNA2T00151575001:promoter
chrA03	12859900	12860400	500	hyper	52	132	0	120	28.26	0	2.6294e-08	12	12	GSBRNA2T00151695001:promoter
chrA03	12859900	12860400	500	hyper	52	132	0	120	28.26	0	2.6294e-08	12	12	GSBRNA2T00151695001:promoter
chrA03	13022600	13023100	500	hyper	69	33	3	69	67.65	4.17	7.9934e-09	8	6	GSBRNA2T00112209001:promoter
chrA03	13022600	13023100	500	hyper	69	33	3	69	67.65	4.17	7.9934e-09	8	6	GSBRNA2T00112209001:promoter
chrA03	13095300	13095800	500	hyper	58	14	9	32	80.56	21.95	0.00093751	6	6	GSBRNA2T00112198001:promoter
chrA03	13095300	13095800	500	hyper	58	14	9	32	80.56	21.95	0.00093751	6	6	GSBRNA2T00112198001:promoter
chrA03	13249500	13250000	500	hyper	32	37	0	67	46.38	0	3.0426e-07	7	10	GSBRNA2T00112173001:promoter
chrA03	13249500	13250000	500	hyper	32	37	0	67	46.38	0	3.0426e-07	7	10	GSBRNA2T00112173001:promoter,GSBRNA2T00112173001:exon
chrA03	13566300	13566800	500	hyper	27	12	0	37	69.23	0	5.9204e-06	6	6	GSBRNA2T00112082001:promoter
chrA03	13566300	13566800	500	hyper	27	12	0	37	69.23	0	5.9204e-06	6	6	GSBRNA2T00112082001:promoter,GSBRNA2T00112082001:exon
chrA03	13769200	13770200	1000	hyper	559	103	0	269	84.44	0	8.9714e-45	15	15	GSBRNA2T00112009001:promoter
chrA03	13769200	13770200	1000	hyper	559	103	0	269	84.44	0	8.9714e-45	15	15	GSBRNA2T00112009001:promoter
chrA03	13953900	13954900	1000	hyper	905	60	0	371	93.78	0	1.8289e-67	14	14	GSBRNA2T00111952001:promoter
chrA03	13953900	13954900	1000	hyper	905	60	0	371	93.78	0	1.8289e-67	14	14	GSBRNA2T00111952001:promoter
chrA03	14874500	14875500	1000	hyper	130	68	0	125	65.66	0	7.7097e-17	13	13	GSBRNA2T00111710001:promoter
chrA03	14874500	14875500	1000	hyper	130	68	0	125	65.66	0	7.7097e-17	13	13	GSBRNA2T00111710001:promoter
chrA03	14878800	14879300	500	hyper	45	41	0	46	52.33	0	4.1627e-06	6	6	GSBRNA2T00111709001:exon
chrA03	14997800	14998300	500	hyper	44	79	0	50	35.77	0	4.8034e-05	10	8	GSBRNA2T00111674001:promoter
chrA03	14997800	14998300	500	hyper	44	79	0	50	35.77	0	4.8034e-05	10	8	GSBRNA2T00111674001:promoter,GSBRNA2T00111673001:exon
chrA03	15418500	15419000	500	hyper	91	60	11	40	60.26	21.57	0.0031256	6	6	GSBRNA2T00111559001:promoter
chrA03	15418500	15419000	500	hyper	91	60	11	40	60.26	21.57	0.0031256	6	6	GSBRNA2T00111559001:promoter
chrA03	15530400	15530900	500	hyper	34	63	1	143	35.05	0.69	3.0037e-10	7	7	GSBRNA2T00111531001:promoter
chrA03	15530400	15530900	500	hyper	34	63	1	143	35.05	0.69	3.0037e-10	7	7	GSBRNA2T00111531001:promoter
chrA03	15542100	15542600	500	hyper	129	35	19	73	78.66	20.65	5.4059e-07	6	6	GSBRNA2T00111529001:promoter
chrA03	15542100	15542600	500	hyper	129	35	19	73	78.66	20.65	5.4059e-07	6	6	GSBRNA2T00111529001:promoter
chrA03	15643100	15643600	500	hyper	17	11	6	65	60.71	8.45	4.3952e-05	5	11	GSBRNA2T00111496001:intron
chrA03	16295200	16296700	1500	hyper	107	308	0	255	25.78	0	6.9307e-15	36	23	GSBRNA2T00137595001:promoter
chrA03	16295200	16296700	1500	hyper	107	308	0	255	25.78	0	6.9307e-15	36	23	GSBRNA2T00137595001:promoter,GSBRNA2T00137595001:exon
chrA03	16323400	16325200	1800	hyper	376	45	97	141	89.31	40.76	1.3949e-08	28	22	GSBRNA2T00137590001:promoter
chrA03	16323400	16325200	1800	hyper	376	45	97	141	89.31	40.76	1.3949e-08	28	22	GSBRNA2T00137590001:promoter
chrA03	16325400	16325900	500	hyper	97	43	0	49	69.29	0	3.6116e-08	9	7	GSBRNA2T00137589001:promoter
chrA03	16325400	16325900	500	hyper	97	43	0	49	69.29	0	3.6116e-08	9	7	GSBRNA2T00137589001:promoter
chrA03	16391400	16391900	500	hyper	12	24	0	86	33.33	0	1.1768e-06	6	11	GSBRNA2T00137571001:exon,GSBRNA2T00137571001:exon
chrA03	16498900	16499400	500	hyper	36	26	40	104	58.06	27.78	0.0068816	5	5	GSBRNA2T00137556001:promoter
chrA03	16498900	16499400	500	hyper	36	26	40	104	58.06	27.78	0.0068816	5	5	GSBRNA2T00137556001:promoter
chrA03	16646100	16647100	1000	hyper	78	28	50	80	73.58	38.46	0.0035073	10	20	GSBRNA2T00137525001:promoter
chrA03	16646100	16647100	1000	hyper	78	28	50	80	73.58	38.46	0.0035073	10	20	GSBRNA2T00137525001:promoter
chrA03	16780700	16781200	500	hyper	14	36	0	48	28	0	0.00053201	6	5	GSBRNA2T00137496001:promoter
chrA03	16780700	16781200	500	hyper	14	36	0	48	28	0	0.00053201	6	5	GSBRNA2T00137496001:promoter
chrA03	16843300	16844400	1100	hyper	127	223	0	72	36.29	0	5.9175e-07	26	13	GSBRNA2T00137478001:promoter,GSBRNA2T00137477001:promoter,GSBRNA2T00137479001:promoter
chrA03	16843300	16844400	1100	hyper	127	223	0	72	36.29	0	5.9175e-07	26	13	GSBRNA2T00137478001:promoter,GSBRNA2T00137477001:promoter,GSBRNA2T00137479001:promoter,GSBRNA2T00137479001:exon
chrA03	17199000	17200000	1000	hyper	148	55	17	161	72.91	9.55	3.4919e-16	15	15	GSBRNA2T00137411001:promoter
chrA03	17199000	17200000	1000	hyper	148	55	17	161	72.91	9.55	3.4919e-16	15	15	GSBRNA2T00137411001:promoter
chrA03	17233500	17234000	500	hyper	30	71	0	47	29.7	0	0.00032076	14	6	GSBRNA2T00137399001:exon,GSBRNA2T00137399001:exon
chrA03	17240400	17240900	500	hyper	28	23	0	31	54.9	0	0.00012346	7	5	GSBRNA2T00137397001:exon
chrA03	17248600	17249100	500	hyper	26	16	0	76	61.9	0	2.6013e-09	6	9	GSBRNA2T00137395001:exon
chrA03	17250900	17251400	500	hyper	63	2	40	76	96.92	34.48	3.9197e-05	7	6	GSBRNA2T00137395001:promoter
chrA03	17250900	17251400	500	hyper	63	2	40	76	96.92	34.48	3.9197e-05	7	6	GSBRNA2T00137395001:promoter
chrA03	17251800	17252300	500	hyper	50	29	0	82	63.29	0	1.0897e-10	7	9	GSBRNA2T00137394001:exon
chrA03	17392400	17392900	500	hyper	71	9	26	110	88.75	19.12	3.211e-09	8	16	GSBRNA2T00137362001:promoter
chrA03	17392400	17392900	500	hyper	71	9	26	110	88.75	19.12	3.211e-09	8	16	GSBRNA2T00137362001:promoter,GSBRNA2T00137363001:exon
chrA03	17430900	17431400	500	hyper	69	25	13	89	73.4	12.75	2.3119e-08	13	7	GSBRNA2T00137353001:promoter
chrA03	17430900	17431400	500	hyper	69	25	13	89	73.4	12.75	2.3119e-08	13	7	GSBRNA2T00137353001:promoter
chrA03	17519000	17519500	500	hyper	34	2	0	45	94.44	0	2.5384e-08	6	6	GSBRNA2T00137334001:promoter,GSBRNA2T00137336001:promoter
chrA03	17519000	17519500	500	hyper	34	2	0	45	94.44	0	2.5384e-08	6	6	GSBRNA2T00137334001:promoter,GSBRNA2T00137336001:promoter
chrA03	17810300	17810800	500	hyper	58	18	0	46	76.32	0	5.9609e-08	5	5	GSBRNA2T00154769001:exon
chrA03	17989300	17989800	500	hyper	56	3	0	41	94.92	0	2.3936e-08	8	6	GSBRNA2T00154805001:intron
chrA03	18077300	18077800	500	hyper	39	8	10	46	82.98	17.86	7.8754e-05	7	7	GSBRNA2T00154829001:promoter
chrA03	18077300	18077800	500	hyper	39	8	10	46	82.98	17.86	7.8754e-05	7	7	GSBRNA2T00154829001:promoter
chrA03	18091400	18091900	500	hyper	47	2	0	26	95.92	0	5.3545e-06	5	5	GSBRNA2T00154833001:promoter
chrA03	18091400	18091900	500	hyper	47	2	0	26	95.92	0	5.3545e-06	5	5	GSBRNA2T00154833001:promoter
chrA03	18219900	18220400	500	hyper	78	66	0	49	54.17	0	8.8009e-07	13	6	GSBRNA2T00154855001:exon
chrA03	18279300	18279800	500	hyper	44	58	0	54	43.14	0	4.9306e-06	7	5	GSBRNA2T00154869001:promoter,GSBRNA2T00154868001:promoter
chrA03	18279300	18279800	500	hyper	44	58	0	54	43.14	0	4.9306e-06	7	5	GSBRNA2T00154869001:promoter,GSBRNA2T00154868001:promoter
chrA03	18519800	18520300	500	hyper	39	41	0	95	48.75	0	6.8147e-10	7	9	GSBRNA2T00154904001:promoter
chrA03	18519800	18520300	500	hyper	39	41	0	95	48.75	0	6.8147e-10	7	9	GSBRNA2T00154904001:promoter
chrA03	18558200	18558700	500	hyper	57	76	0	81	42.86	0	2.9013e-08	17	7	GSBRNA2T00154912001:exon,GSBRNA2T00154912001:exon,GSBRNA2T00154912001:exon
chrA03	18584500	18585000	500	hyper	43	2	0	33	95.56	0	5.6903e-07	7	5	GSBRNA2T00154918001:exon
chrA03	18597800	18598300	500	hyper	41	23	2	30	64.06	6.25	0.00027662	7	5	GSBRNA2T00154920001:promoter
chrA03	18597800	18598300	500	hyper	41	23	2	30	64.06	6.25	0.00027662	7	5	GSBRNA2T00154920001:promoter
chrA03	18881600	18882100	500	hyper	118	14	17	31	89.39	35.42	0.0022538	9	7	GSBRNA2T00154987001:promoter
chrA03	18881600	18882100	500	hyper	118	14	17	31	89.39	35.42	0.0022538	9	7	GSBRNA2T00154987001:promoter
chrA03	18883200	18884200	1000	hyper	313	11	88	118	96.6	42.72	3.7841e-08	21	21	GSBRNA2T00154988001:promoter
chrA03	18883200	18884200	1000	hyper	313	11	88	118	96.6	42.72	3.7841e-08	21	21	GSBRNA2T00154988001:promoter
chrA03	18944300	18944800	500	hyper	30	17	0	36	63.83	0	1.2433e-05	5	5	GSBRNA2T00155002001:promoter
chrA03	18944300	18944800	500	hyper	30	17	0	36	63.83	0	1.2433e-05	5	5	GSBRNA2T00155002001:promoter
chrA03	18987700	18988200	500	hyper	59	18	21	50	76.62	29.58	0.0014188	8	10	GSBRNA2T00155009001:exon,GSBRNA2T00155009001:exon
chrA03	19014700	19015200	500	hyper	65	53	6	61	55.08	8.96	1.0575e-05	11	5	GSBRNA2T00155016001:promoter
chrA03	19014700	19015200	500	hyper	65	53	6	61	55.08	8.96	1.0575e-05	11	5	GSBRNA2T00155016001:promoter
chrA03	19043500	19044000	500	hyper	30	49	0	56	37.97	0	1.4231e-05	7	6	GSBRNA2T00155024001:promoter
chrA03	19043500	19044000	500	hyper	30	49	0	56	37.97	0	1.4231e-05	7	6	GSBRNA2T00155024001:promoter
chrA03	19089600	19090100	500	hyper	62	21	0	58	74.7	0	2.2958e-09	5	5	GSBRNA2T00155034001:promoter
chrA03	19089600	19090100	500	hyper	62	21	0	58	74.7	0	2.2958e-09	5	5	GSBRNA2T00155034001:promoter
chrA03	19090500	19091000	500	hyper	50	73	0	71	40.65	0	3.7694e-07	7	7	GSBRNA2T00155034001:promoter
chrA03	19090500	19091000	500	hyper	50	73	0	71	40.65	0	3.7694e-07	7	7	GSBRNA2T00155034001:promoter
chrA03	19221300	19222300	1000	hyper	70	196	0	217	26.32	0	6.2708e-13	20	19	GSBRNA2T00155066001:promoter
chrA03	19221300	19222300	1000	hyper	70	196	0	217	26.32	0	6.2708e-13	20	19	GSBRNA2T00155066001:promoter
chrA03	19272600	19273100	500	hyper	53	35	1	56	60.23	1.75	2.3344e-07	8	6	GSBRNA2T00155081001:promoter
chrA03	19272600	19273100	500	hyper	53	35	1	56	60.23	1.75	2.3344e-07	8	6	GSBRNA2T00155081001:promoter
chrA03	19273500	19274000	500	hyper	59	103	0	130	36.42	0	1.0541e-10	5	7	GSBRNA2T00155081001:promoter,GSBRNA2T00155082001:promoter
chrA03	19273500	19274000	500	hyper	59	103	0	130	36.42	0	1.0541e-10	5	7	GSBRNA2T00155081001:promoter,GSBRNA2T00155082001:promoter
chrA03	19437100	19437600	500	hyper	82	57	0	100	58.99	0	1.6729e-12	7	7	GSBRNA2T00113688001:intron
chrA03	19536100	19536600	500	hyper	94	14	38	62	87.04	38	0.00041583	6	6	GSBRNA2T00113669001:promoter
chrA03	19536100	19536600	500	hyper	94	14	38	62	87.04	38	0.00041583	6	6	GSBRNA2T00113669001:promoter
chrA03	19537800	19538300	500	hyper	38	22	0	72	63.33	0	2.0188e-09	6	6	GSBRNA2T00113669001:promoter
chrA03	19537800	19538300	500	hyper	38	22	0	72	63.33	0	2.0188e-09	6	6	GSBRNA2T00113669001:promoter
chrA03	19540700	19541200	500	hyper	23	20	0	43	53.49	0	1.3124e-05	5	5	GSBRNA2T00113668001:promoter,GSBRNA2T00113667001:promoter
chrA03	19540700	19541200	500	hyper	23	20	0	43	53.49	0	1.3124e-05	5	5	GSBRNA2T00113668001:promoter,GSBRNA2T00113667001:promoter
chrA03	19589700	19590200	500	hyper	50	52	0	83	49.02	0	3.8826e-09	5	5	GSBRNA2T00113656001:promoter
chrA03	19589700	19590200	500	hyper	50	52	0	83	49.02	0	3.8826e-09	5	5	GSBRNA2T00113656001:promoter
chrA03	19620100	19620600	500	hyper	32	16	0	71	66.67	0	1.9361e-09	6	6	GSBRNA2T00113647001:exon
chrA03	19627400	19628400	1000	hyper	122	209	0	195	36.86	0	8.7339e-16	19	18	GSBRNA2T00113645001:promoter
chrA03	19627400	19628400	1000	hyper	122	209	0	195	36.86	0	8.7339e-16	19	18	GSBRNA2T00113645001:promoter
chrA03	19700000	19700500	500	hyper	30	62	0	78	32.61	0	2.0314e-06	8	8	GSBRNA2T00113634001:promoter
chrA03	19700000	19700500	500	hyper	30	62	0	78	32.61	0	2.0314e-06	8	8	GSBRNA2T00113634001:promoter
chrA03	19875800	19876900	1100	hyper	166	96	1	99	63.36	1	1.971e-13	31	15	GSBRNA2T00113595001:exon
chrA03	20233800	20234300	500	hyper	199	129	33	140	60.67	19.08	1.2797e-08	14	7	GSBRNA2T00113509001:promoter
chrA03	20233800	20234300	500	hyper	199	129	33	140	60.67	19.08	1.2797e-08	14	7	GSBRNA2T00113509001:promoter,GSBRNA2T00113510001:exon
chrA03	20344700	20345200	500	hyper	42	106	0	43	28.38	0	0.00066114	17	6	GSBRNA2T00113482001:exon
chrA03	20502200	20502700	500	hyper	84	7	0	44	92.31	0	4.8186e-09	10	5	GSBRNA2T00151351001:promoter,GSBRNA2T00151353001:promoter
chrA03	20502200	20502700	500	hyper	84	7	0	44	92.31	0	4.8186e-09	10	5	GSBRNA2T00151351001:promoter,GSBRNA2T00151353001:promoter,GSBRNA2T00151351001:exon
chrA03	20512400	20512900	500	hyper	110	95	14	97	53.66	12.61	6.1072e-07	17	11	GSBRNA2T00151346001:promoter
chrA03	20512400	20512900	500	hyper	110	95	14	97	53.66	12.61	6.1072e-07	17	11	GSBRNA2T00151346001:promoter,GSBRNA2T00151346001:exon
chrA03	20693100	20694100	1000	hyper	141	84	0	81	62.67	0	1.4626e-11	18	13	GSBRNA2T00151301001:promoter
chrA03	20693100	20694100	1000	hyper	141	84	0	81	62.67	0	1.4626e-11	18	13	GSBRNA2T00151301001:promoter,GSBRNA2T00151299001:exon
chrA03	20844600	20845600	1000	hyper	95	96	0	103	49.74	0	1.7178e-11	20	13	GSBRNA2T00151273001:promoter
chrA03	20844600	20845600	1000	hyper	95	96	0	103	49.74	0	1.7178e-11	20	13	GSBRNA2T00151273001:promoter,GSBRNA2T00151272001:exon,GSBRNA2T00151272001:exon,GSBRNA2T00151272001:exon
chrA03	20929900	20930400	500	hyper	20	43	0	39	31.75	0	0.00080042	8	7	GSBRNA2T00151254001:exon,GSBRNA2T00151254001:exon
chrA03	21128100	21128600	500	hyper	49	26	0	42	65.33	0	1.2186e-06	10	5	GSBRNA2T00151209001:promoter
chrA03	21128100	21128600	500	hyper	49	26	0	42	65.33	0	1.2186e-06	10	5	GSBRNA2T00151209001:promoter
chrA03	21185700	21186200	500	hyper	26	11	0	40	70.27	0	2.6124e-06	6	6	GSBRNA2T00151192001:exon,GSBRNA2T00151192001:exon
chrA03	21223600	21224100	500	hyper	26	22	0	41	54.17	0	1.6006e-05	7	7	GSBRNA2T00151186001:promoter
chrA03	21223600	21224100	500	hyper	26	22	0	41	54.17	0	1.6006e-05	7	7	GSBRNA2T00151186001:promoter,GSBRNA2T00151186001:exon
chrA03	21275600	21276100	500	hyper	24	47	0	33	33.8	0	0.0013589	10	5	GSBRNA2T00151174001:promoter
chrA03	21275600	21276100	500	hyper	24	47	0	33	33.8	0	0.0013589	10	5	GSBRNA2T00151174001:promoter,GSBRNA2T00151173001:exon
chrA03	21307000	21307500	500	hyper	50	72	0	88	40.98	0	1.8252e-08	7	7	GSBRNA2T00151162001:promoter
chrA03	21307000	21307500	500	hyper	50	72	0	88	40.98	0	1.8252e-08	7	7	GSBRNA2T00151162001:promoter
chrA03	21662900	21663400	500	hyper	44	28	0	47	61.11	0	7.7489e-07	7	5	GSBRNA2T00151074001:promoter
chrA03	21662900	21663400	500	hyper	44	28	0	47	61.11	0	7.7489e-07	7	5	GSBRNA2T00151074001:promoter,GSBRNA2T00151075001:exon,GSBRNA2T00151075001:exon,GSBRNA2T00151075001:exon
chrA03	21899300	21899800	500	hyper	118	11	14	43	91.47	24.56	2.3555e-05	8	8	GSBRNA2T00151035001:exon
chrA03	21942600	21943100	500	hyper	86	46	0	49	65.15	0	9.2984e-08	11	6	GSBRNA2T00151032001:promoter
chrA03	21942600	21943100	500	hyper	86	46	0	49	65.15	0	9.2984e-08	11	6	GSBRNA2T00151032001:promoter
chrA03	21986200	21986700	500	hyper	33	57	0	77	36.67	0	6.5582e-07	9	9	GSBRNA2T00151021001:promoter
chrA03	21986200	21986700	500	hyper	33	57	0	77	36.67	0	6.5582e-07	9	9	GSBRNA2T00151021001:promoter
chrA03	22047200	22047700	500	hyper	87	4	67	56	95.6	54.47	0.0081574	6	6	GSBRNA2T00106621001:promoter
chrA03	22047200	22047700	500	hyper	87	4	67	56	95.6	54.47	0.0081574	6	6	GSBRNA2T00106621001:promoter
chrA03	22254000	22254500	500	hyper	33	24	0	52	57.89	0	6.2319e-07	5	7	GSBRNA2T00106664001:exon
chrA03	22310800	22311300	500	hyper	104	38	0	39	73.24	0	3.483e-07	10	6	GSBRNA2T00106678001:promoter,GSBRNA2T00106679001:promoter
chrA03	22310800	22311300	500	hyper	104	38	0	39	73.24	0	3.483e-07	10	6	GSBRNA2T00106678001:promoter,GSBRNA2T00106679001:promoter
chrA03	22537200	22537700	500	hyper	23	21	0	43	52.27	0	1.5593e-05	5	5	GSBRNA2T00106713001:exon
chrA03	22636100	22636600	500	hyper	93	22	11	24	80.87	31.43	0.0094329	8	5	GSBRNA2T00106733001:promoter
chrA03	22636100	22636600	500	hyper	93	22	11	24	80.87	31.43	0.0094329	8	5	GSBRNA2T00106733001:promoter
chrA03	22749600	22750100	500	hyper	46	19	0	37	70.77	0	2.3956e-06	9	5	GSBRNA2T00106753001:promoter,GSBRNA2T00106754001:promoter
chrA03	22749600	22750100	500	hyper	46	19	0	37	70.77	0	2.3956e-06	9	5	GSBRNA2T00106753001:promoter,GSBRNA2T00106754001:promoter,GSBRNA2T00106754001:exon
chrA03	23269700	23270200	500	hyper	45	87	0	53	34.09	0	4.2593e-05	12	6	GSBRNA2T00106867001:promoter
chrA03	23269700	23270200	500	hyper	45	87	0	53	34.09	0	4.2593e-05	12	6	GSBRNA2T00106867001:promoter
chrA03	23350800	23351300	500	hyper	71	45	6	47	61.21	11.32	5.9538e-05	8	6	GSBRNA2T00048829001:exon
chrA03	23364600	23365100	500	hyper	32	28	2	52	53.33	3.7	1.1999e-05	5	9	GSBRNA2T00048831001:exon,GSBRNA2T00048831001:exon
chrA03	23529900	23531500	1600	hyper	496	148	17	228	77.02	6.94	3.3358e-29	30	29	GSBRNA2T00048871001:promoter
chrA03	23529900	23531500	1600	hyper	496	148	17	228	77.02	6.94	3.3358e-29	30	29	GSBRNA2T00048871001:promoter
chrA03	23571400	23571900	500	hyper	130	41	0	90	76.02	0	2.3306e-14	12	9	GSBRNA2T00048877001:promoter
chrA03	23571400	23571900	500	hyper	130	41	0	90	76.02	0	2.3306e-14	12	9	GSBRNA2T00048877001:promoter
chrA03	23597500	23598000	500	hyper	63	112	13	104	36	11.11	0.00019092	18	11	GSBRNA2T00048882001:exon
chrA03	23870500	23871500	1000	hyper	460	31	5	67	93.69	6.94	1.238e-12	35	12	GSBRNA2T00048934001:promoter
chrA03	23870500	23871500	1000	hyper	460	31	5	67	93.69	6.94	1.238e-12	35	12	GSBRNA2T00048934001:promoter
chrA03	23922700	23923200	500	hyper	80	31	0	56	72.07	0	3.8628e-09	10	6	GSBRNA2T00048947001:promoter
chrA03	23922700	23923200	500	hyper	80	31	0	56	72.07	0	3.8628e-09	10	6	GSBRNA2T00048947001:promoter,GSBRNA2T00048948001:exon,GSBRNA2T00048948001:exon
chrA03	23924700	23925200	500	hyper	21	29	0	38	42	0	0.0001906	5	5	GSBRNA2T00048948001:promoter
chrA03	23924700	23925200	500	hyper	21	29	0	38	42	0	0.0001906	5	5	GSBRNA2T00048948001:promoter
chrA03	24029500	24030000	500	hyper	44	41	0	32	51.76	0	0.00010641	11	6	GSBRNA2T00048978001:exon,GSBRNA2T00048978001:exon
chrA03	24155600	24156100	500	hyper	114	13	1	89	89.76	1.11	2.9686e-15	6	5	GSBRNA2T00049009001:promoter
chrA03	24155600	24156100	500	hyper	114	13	1	89	89.76	1.11	2.9686e-15	6	5	GSBRNA2T00049009001:promoter
chrA03	24377000	24377500	500	hyper	48	117	0	187	29.09	0	4.5143e-12	8	8	GSBRNA2T00096130001:promoter
chrA03	24377000	24377500	500	hyper	48	117	0	187	29.09	0	4.5143e-12	8	8	GSBRNA2T00096130001:promoter
chrA03	24428300	24428800	500	hyper	97	128	0	42	43.11	0	3.2793e-05	20	7	GSBRNA2T00096120001:promoter
chrA03	24428300	24428800	500	hyper	97	128	0	42	43.11	0	3.2793e-05	20	7	GSBRNA2T00096120001:promoter,GSBRNA2T00096119001:exon
chrA03	24490500	24491000	500	hyper	67	12	42	62	84.81	40.38	0.0024882	7	6	GSBRNA2T00075323001:promoter
chrA03	24490500	24491000	500	hyper	67	12	42	62	84.81	40.38	0.0024882	7	6	GSBRNA2T00075323001:promoter,GSBRNA2T00075323001:exon,GSBRNA2T00075323001:exon
chrA03	24526700	24527700	1000	hyper	606	55	120	149	91.68	44.61	3.5464e-09	30	24	GSBRNA2T00075315001:exon
chrA03	24549700	24550700	1000	hyper	314	75	54	148	80.72	26.73	3.1313e-11	29	26	GSBRNA2T00075307001:intron
chrA03	24577500	24578500	1000	hyper	118	60	46	172	66.29	21.1	5.7061e-09	14	19	GSBRNA2T00075302001:promoter,GSBRNA2T00075301001:promoter
chrA03	24577500	24578500	1000	hyper	118	60	46	172	66.29	21.1	5.7061e-09	14	19	GSBRNA2T00075302001:promoter,GSBRNA2T00075301001:promoter,GSBRNA2T00075301001:exon,GSBRNA2T00075301001:exon
chrA03	24698500	24699000	500	hyper	46	7	0	50	86.79	0	6.7418e-09	5	6	GSBRNA2T00075274001:exon
chrA03	24769700	24770200	500	hyper	15	59	0	68	20.27	0	0.00037131	5	8	GSBRNA2T00085984001:promoter,GSBRNA2T00085985001:promoter
chrA03	24769700	24770200	500	hyper	15	59	0	68	20.27	0	0.00037131	5	8	GSBRNA2T00085984001:promoter,GSBRNA2T00085985001:promoter
chrA03	24919600	24920100	500	hyper	21	54	0	102	28	0	5.854e-07	8	8	GSBRNA2T00044273001:promoter,GSBRNA2T00044272001:promoter
chrA03	24919600	24920100	500	hyper	21	54	0	102	28	0	5.854e-07	8	8	GSBRNA2T00044273001:promoter,GSBRNA2T00044272001:promoter
chrA03	24972300	24972800	500	hyper	57	19	0	54	75	0	7.9385e-09	7	5	GSBRNA2T00044285001:promoter,GSBRNA2T00044286001:promoter
chrA03	24972300	24972800	500	hyper	57	19	0	54	75	0	7.9385e-09	7	5	GSBRNA2T00044285001:promoter,GSBRNA2T00044286001:promoter
chrA03	25186400	25186900	500	hyper	72	49	0	61	59.5	0	1.7454e-08	7	5	GSBRNA2T00044326001:promoter
chrA03	25186400	25186900	500	hyper	72	49	0	61	59.5	0	1.7454e-08	7	5	GSBRNA2T00044326001:promoter,GSBRNA2T00044326001:exon
chrA03	25195700	25196200	500	hyper	92	11	7	57	89.32	10.94	2.5471e-08	7	7	GSBRNA2T00044328001:intron
chrA03	25322700	25324300	1600	hyper	511	47	0	266	91.58	0	1.0218e-46	34	21	GSBRNA2T00044357001:promoter
chrA03	25322700	25324300	1600	hyper	511	47	0	266	91.58	0	1.0218e-46	34	21	GSBRNA2T00044357001:promoter,GSBRNA2T00044357001:exon
chrA03	25459400	25459900	500	hyper	109	29	2	75	78.99	2.6	1.1102e-11	6	6	GSBRNA2T00044862001:promoter
chrA03	25459400	25459900	500	hyper	109	29	2	75	78.99	2.6	1.1102e-11	6	6	GSBRNA2T00044862001:promoter
chrA03	25561700	25562700	1000	hyper	154	44	74	104	77.78	41.57	0.00032298	19	17	GSBRNA2T00044831001:promoter
chrA03	25561700	25562700	1000	hyper	154	44	74	104	77.78	41.57	0.00032298	19	17	GSBRNA2T00044831001:promoter,GSBRNA2T00044832001:exon
chrA03	25562700	25563200	500	hyper	63	13	0	46	82.89	0	1.8796e-08	7	7	GSBRNA2T00044831001:promoter
chrA03	25562700	25563200	500	hyper	63	13	0	46	82.89	0	1.8796e-08	7	7	GSBRNA2T00044831001:promoter,GSBRNA2T00044831001:exon
chrA03	25563400	25563900	500	hyper	23	68	0	37	25.27	0	0.003002	7	5	GSBRNA2T00044831001:exon
chrA03	25710400	25710900	500	hyper	63	9	2	84	87.5	2.33	1.0025e-12	5	7	GSBRNA2T00044792001:promoter
chrA03	25710400	25710900	500	hyper	63	9	2	84	87.5	2.33	1.0025e-12	5	7	GSBRNA2T00044792001:promoter
chrA03	25756100	25756600	500	hyper	111	74	0	59	60	0	1.398e-08	9	8	GSBRNA2T00044784001:exon
chrA03	25868700	25869200	500	hyper	61	9	16	32	87.14	33.33	0.0038194	6	6	GSBRNA2T00044762001:promoter
chrA03	25868700	25869200	500	hyper	61	9	16	32	87.14	33.33	0.0038194	6	6	GSBRNA2T00044762001:promoter,GSBRNA2T00044762001:exon
chrA03	26210000	26210500	500	hyper	44	30	1	70	59.46	1.41	1.6375e-08	5	8	GSBRNA2T00067465001:promoter,GSBRNA2T00067464001:promoter
chrA03	26210000	26210500	500	hyper	44	30	1	70	59.46	1.41	1.6375e-08	5	8	GSBRNA2T00067465001:promoter,GSBRNA2T00067464001:promoter
chrA03	26211600	26212100	500	hyper	32	34	0	66	48.48	0	2.2852e-07	12	11	GSBRNA2T00067465001:promoter,GSBRNA2T00067464001:promoter
chrA03	26211600	26212100	500	hyper	32	34	0	66	48.48	0	2.2852e-07	12	11	GSBRNA2T00067465001:promoter,GSBRNA2T00067464001:promoter
chrA03	26397200	26397700	500	hyper	55	144	1	218	27.64	0.46	9.9641e-13	14	14	GSBRNA2T00092686001:promoter
chrA03	26397200	26397700	500	hyper	55	144	1	218	27.64	0.46	9.9641e-13	14	14	GSBRNA2T00092686001:promoter
chrA03	26408300	26408800	500	hyper	32	79	0	50	28.83	0	0.00024993	11	9	GSBRNA2T00092688001:promoter
chrA03	26408300	26408800	500	hyper	32	79	0	50	28.83	0	0.00024993	11	9	GSBRNA2T00092688001:promoter,GSBRNA2T00092689001:exon,GSBRNA2T00092689001:exon
chrA03	26441300	26441800	500	hyper	39	51	0	97	43.33	0	2.6281e-09	7	11	GSBRNA2T00092697001:promoter,GSBRNA2T00092696001:promoter
chrA03	26441300	26441800	500	hyper	39	51	0	97	43.33	0	2.6281e-09	7	11	GSBRNA2T00092697001:promoter,GSBRNA2T00092696001:promoter
chrA03	26443700	26444700	1000	hyper	30	39	0	122	43.48	0	6.1366e-11	12	10	GSBRNA2T00092699001:promoter
chrA03	26443700	26444700	1000	hyper	30	39	0	122	43.48	0	6.1366e-11	12	10	GSBRNA2T00092699001:promoter
chrA03	26631200	26632200	1000	hyper	203	165	40	229	55.16	14.87	8.0779e-13	18	18	GSBRNA2T00077690001:promoter
chrA03	26631200	26632200	1000	hyper	203	165	40	229	55.16	14.87	8.0779e-13	18	18	GSBRNA2T00077690001:promoter
chrA03	26879800	26880300	500	hyper	67	22	14	44	75.28	24.14	0.00056684	6	6	GSBRNA2T00077747001:exon,GSBRNA2T00077747001:exon
chrA03	26951500	26952000	500	hyper	44	21	13	39	67.69	25	0.0056209	9	9	GSBRNA2T00077759001:promoter
chrA03	26951500	26952000	500	hyper	44	21	13	39	67.69	25	0.0056209	9	9	GSBRNA2T00077759001:promoter
chrA03	27031000	27032000	1000	hyper	79	9	6	186	89.77	3.12	2.0561e-23	12	10	GSBRNA2T00077776001:promoter
chrA03	27031000	27032000	1000	hyper	79	9	6	186	89.77	3.12	2.0561e-23	12	10	GSBRNA2T00077776001:promoter
chrA03	27104000	27105000	1000	hyper	254	114	14	155	69.02	8.28	5.5853e-17	33	23	GSBRNA2T00077789001:promoter
chrA03	27104000	27105000	1000	hyper	254	114	14	155	69.02	8.28	5.5853e-17	33	23	GSBRNA2T00077789001:promoter,GSBRNA2T00077789001:exon,GSBRNA2T00077789001:exon,GSBRNA2T00077789001:exon
chrA03	27153200	27155100	1900	hyper	340	32	0	119	91.4	0	1.0513e-22	24	16	GSBRNA2T00077803001:promoter
chrA03	27153200	27155100	1900	hyper	340	32	0	119	91.4	0	1.0513e-22	24	16	GSBRNA2T00077803001:promoter
chrA03	27170400	27171700	1300	hyper	123	15	33	68	89.13	32.67	1.4846e-05	15	13	GSBRNA2T00077806001:promoter
chrA03	27170400	27171700	1300	hyper	123	15	33	68	89.13	32.67	1.4846e-05	15	13	GSBRNA2T00077806001:promoter
chrA03	27410400	27410900	500	hyper	64	8	0	59	88.89	0	1.2864e-10	8	6	GSBRNA2T00083276001:promoter
chrA03	27410400	27410900	500	hyper	64	8	0	59	88.89	0	1.2864e-10	8	6	GSBRNA2T00083276001:promoter
chrA03	27564900	27565400	500	hyper	214	37	76	93	85.26	44.97	0.00011073	13	13	GSBRNA2T00081758001:promoter
chrA03	27564900	27565400	500	hyper	214	37	76	93	85.26	44.97	0.00011073	13	13	GSBRNA2T00081758001:promoter,GSBRNA2T00081758001:exon
chrA03	27567000	27568000	1000	hyper	300	91	1	113	76.73	0.88	2.4715e-18	23	15	GSBRNA2T00081758001:exon,GSBRNA2T00081758001:exon,GSBRNA2T00081758001:exon
chrA03	27571400	27572400	1000	hyper	437	35	79	170	92.58	31.73	4.2467e-14	25	26	GSBRNA2T00081759001:promoter
chrA03	27571400	27572400	1000	hyper	437	35	79	170	92.58	31.73	4.2467e-14	25	26	GSBRNA2T00081759001:promoter
chrA03	27935300	27935800	500	hyper	64	15	0	64	81.01	0	1.2014e-10	7	6	GSBRNA2T00071494001:promoter,GSBRNA2T00071496001:promoter,GSBRNA2T00071495001:promoter
chrA03	27935300	27935800	500	hyper	64	15	0	64	81.01	0	1.2014e-10	7	6	GSBRNA2T00071494001:promoter,GSBRNA2T00071496001:promoter,GSBRNA2T00071495001:promoter
chrA03	28006300	28006800	500	hyper	89	28	0	37	76.07	0	5.1049e-07	11	5	GSBRNA2T00071478001:exon,GSBRNA2T00071478001:exon
chrA03	28041700	28042200	500	hyper	45	52	0	50	46.39	0	5.384e-06	11	6	GSBRNA2T00071468001:promoter
chrA03	28041700	28042200	500	hyper	45	52	0	50	46.39	0	5.384e-06	11	6	GSBRNA2T00071468001:promoter,GSBRNA2T00071469001:exon
chrA03	28127700	28128200	500	hyper	87	7	8	38	92.55	17.39	1.244e-05	6	6	GSBRNA2T00075231001:promoter
chrA03	28127700	28128200	500	hyper	87	7	8	38	92.55	17.39	1.244e-05	6	6	GSBRNA2T00075231001:promoter
chrA03	28131000	28131500	500	hyper	53	8	0	44	86.89	0	2.8876e-08	5	5	GSBRNA2T00075231001:intron
chrA03	28149100	28150400	1300	hyper	756	53	113	113	93.45	50	5.2214e-07	45	16	GSBRNA2T00075235001:promoter
chrA03	28149100	28150400	1300	hyper	756	53	113	113	93.45	50	5.2214e-07	45	16	GSBRNA2T00075235001:promoter,GSBRNA2T00075235001:exon,GSBRNA2T00075235001:exon
chrA03	28151300	28152700	1400	hyper	152	7	0	88	95.6	0	7.7306e-17	15	13	GSBRNA2T00075236001:promoter,GSBRNA2T00075235001:promoter
chrA03	28151300	28152700	1400	hyper	152	7	0	88	95.6	0	7.7306e-17	15	13	GSBRNA2T00075236001:promoter,GSBRNA2T00075235001:promoter,GSBRNA2T00075236001:exon
chrA03	28426700	28427200	500	hyper	78	54	0	41	59.09	0	2.5953e-06	18	8	GSBRNA2T00043249001:intron
chrA03	28531600	28532100	500	hyper	306	38	86	59	88.95	59.31	0.0096846	13	13	GSBRNA2T00043276001:promoter
chrA03	28531600	28532100	500	hyper	306	38	86	59	88.95	59.31	0.0096846	13	13	GSBRNA2T00043276001:promoter
chrA03	28618900	28619400	500	hyper	62	5	33	78	92.54	29.73	1.3334e-05	6	8	GSBRNA2T00043290001:promoter,GSBRNA2T00043289001:promoter
chrA03	28618900	28619400	500	hyper	62	5	33	78	92.54	29.73	1.3334e-05	6	8	GSBRNA2T00043290001:promoter,GSBRNA2T00043289001:promoter
chrA03	28696500	28697500	1000	hyper	216	10	67	169	95.58	28.39	1.4529e-13	17	18	GSBRNA2T00043301001:promoter
chrA03	28696500	28697500	1000	hyper	216	10	67	169	95.58	28.39	1.4529e-13	17	18	GSBRNA2T00043301001:promoter
chrA03	28997000	28997500	500	hyper	65	1	31	118	98.48	20.81	1.0186e-09	9	9	GSBRNA2T00050138001:exon
chrA03	29558300	29558800	500	hyper	201	35	16	108	85.17	12.9	2.0114e-13	8	8	GSBRNA2T00051610001:promoter,GSBRNA2T00051609001:promoter,GSBRNA2T00051611001:promoter
chrA03	29558300	29558800	500	hyper	201	35	16	108	85.17	12.9	2.0114e-13	8	8	GSBRNA2T00051610001:promoter,GSBRNA2T00051609001:promoter,GSBRNA2T00051611001:promoter
chrA03_random	72300	72800	500	hyper	38	102	0	44	27.14	0	0.00076135	15	6	GSBRNA2T00016411001:promoter
chrA03_random	72300	72800	500	hyper	38	102	0	44	27.14	0	0.00076135	15	6	GSBRNA2T00016411001:promoter
chrA03_random	121300	121800	500	hyper	47	24	0	52	66.2	0	8.7788e-08	8	6	GSBRNA2T00016425001:promoter
chrA03_random	121300	121800	500	hyper	47	24	0	52	66.2	0	8.7788e-08	8	6	GSBRNA2T00016425001:promoter
chrA03_random	133700	134200	500	hyper	89	48	0	69	64.96	0	4.4331e-10	7	5	GSBRNA2T00056732001:promoter
chrA03_random	133700	134200	500	hyper	89	48	0	69	64.96	0	4.4331e-10	7	5	GSBRNA2T00056732001:promoter
chrA03_random	140900	142100	1200	hyper	189	25	8	101	88.32	7.34	3.7274e-15	13	12	GSBRNA2T00056734001:promoter
chrA03_random	140900	142100	1200	hyper	189	25	8	101	88.32	7.34	3.7274e-15	13	12	GSBRNA2T00056734001:promoter
chrA03_random	226100	227100	1000	hyper	146	45	93	201	76.44	31.63	3.6653e-08	15	26	GSBRNA2T00004973001:promoter
chrA03_random	226100	227100	1000	hyper	146	45	93	201	76.44	31.63	3.6653e-08	15	26	GSBRNA2T00004973001:promoter
chrA03_random	238200	239800	1600	hyper	484	44	15	179	91.67	7.73	1.3876e-27	28	21	GSBRNA2T00063633001:promoter,GSBRNA2T00063634001:promoter
chrA03_random	238200	239800	1600	hyper	484	44	15	179	91.67	7.73	1.3876e-27	28	21	GSBRNA2T00063633001:promoter,GSBRNA2T00063634001:promoter,GSBRNA2T00063634001:exon,GSBRNA2T00063634001:exon,GSBRNA2T00063634001:exon
chrA03_random	365700	366200	500	hyper	21	13	0	55	61.76	0	3.4946e-07	6	7	GSBRNA2T00051025001:promoter
chrA03_random	365700	366200	500	hyper	21	13	0	55	61.76	0	3.4946e-07	6	7	GSBRNA2T00051025001:promoter
chrA03_random	389000	389500	500	hyper	30	25	0	27	54.55	0	0.00030888	6	5	GSBRNA2T00028358001:exon,GSBRNA2T00028358001:exon,GSBRNA2T00028358001:exon
chrA03_random	492200	493200	1000	hyper	165	26	1	97	86.39	1.02	1.1407e-16	23	17	GSBRNA2T00019733001:promoter
chrA03_random	492200	493200	1000	hyper	165	26	1	97	86.39	1.02	1.1407e-16	23	17	GSBRNA2T00019733001:promoter,GSBRNA2T00019733001:exon
chrA03_random	519200	519700	500	hyper	94	32	0	118	74.6	0	6.4264e-17	6	6	GSBRNA2T00004317001:exon
chrA03_random	523700	524900	1200	hyper	131	56	8	151	70.05	5.03	3.6177e-17	12	13	GSBRNA2T00004317001:promoter,GSBRNA2T00004318001:promoter
chrA03_random	523700	524900	1200	hyper	131	56	8	151	70.05	5.03	3.6177e-17	12	13	GSBRNA2T00004317001:promoter,GSBRNA2T00004318001:promoter,GSBRNA2T00004317001:exon
chrA03_random	585200	585700	500	hyper	35	22	0	59	61.4	0	6.4674e-08	5	5	GSBRNA2T00004334001:promoter
chrA03_random	585200	585700	500	hyper	35	22	0	59	61.4	0	6.4674e-08	5	5	GSBRNA2T00004334001:promoter
chrA03_random	652700	653800	1100	hyper	135	183	10	195	42.45	4.88	1.7514e-13	14	13	GSBRNA2T00040843001:promoter
chrA03_random	652700	653800	1100	hyper	135	183	10	195	42.45	4.88	1.7514e-13	14	13	GSBRNA2T00040843001:promoter
chrA03_random	782900	783400	500	hyper	174	12	10	31	93.55	24.39	0.00011291	7	6	GSBRNA2T00030384001:exon
chrA03_random	1009900	1010400	500	hyper	159	11	7	130	93.53	5.11	7.8806e-20	5	5	GSBRNA2T00003408001:promoter
chrA03_random	1009900	1010400	500	hyper	159	11	7	130	93.53	5.11	7.8806e-20	5	5	GSBRNA2T00003408001:promoter
chrA03_random	1196300	1196800	500	hyper	82	49	0	133	62.6	0	2.5736e-16	9	8	GSBRNA2T00023634001:promoter
chrA03_random	1196300	1196800	500	hyper	82	49	0	133	62.6	0	2.5736e-16	9	8	GSBRNA2T00023634001:promoter
chrA03_random	1313000	1313500	500	hyper	21	11	0	69	65.62	0	9.1024e-09	5	7	GSBRNA2T00006694001:exon
chrA03_random	1400300	1400800	500	hyper	79	59	6	80	57.25	6.98	7.4882e-08	8	8	GSBRNA2T00065286001:promoter
chrA03_random	1400300	1400800	500	hyper	79	59	6	80	57.25	6.98	7.4882e-08	8	8	GSBRNA2T00065286001:promoter
chrA03_random	1432200	1432700	500	hyper	31	3	0	29	91.18	0	5.5531e-06	5	5	GSBRNA2T00023300001:promoter
chrA03_random	1432200	1432700	500	hyper	31	3	0	29	91.18	0	5.5531e-06	5	5	GSBRNA2T00023300001:promoter
chrA03_random	1823200	1823700	500	hyper	35	9	26	69	79.55	27.37	0.00061246	5	5	GSBRNA2T00038078001:promoter
chrA03_random	1823200	1823700	500	hyper	35	9	26	69	79.55	27.37	0.00061246	5	5	GSBRNA2T00038078001:promoter
chrA03_random	1824700	1826700	2000	hyper	263	83	2	158	76.01	1.25	1.658e-23	32	18	GSBRNA2T00038078001:exon
chrA03_random	1993300	1994800	1500	hyper	632	72	0	307	89.77	0	2.9117e-53	45	28	GSBRNA2T00004046001:promoter
chrA03_random	1993300	1994800	1500	hyper	632	72	0	307	89.77	0	2.9117e-53	45	28	GSBRNA2T00004046001:promoter,GSBRNA2T00004046001:exon
chrA03_random	2244500	2245000	500	hyper	70	33	1	33	67.96	2.94	1.8769e-05	8	5	GSBRNA2T00027628001:promoter
chrA03_random	2244500	2245000	500	hyper	70	33	1	33	67.96	2.94	1.8769e-05	8	5	GSBRNA2T00027628001:promoter
chrA03_random	2562000	2563400	1400	hyper	194	37	2	142	83.98	1.39	2.4458e-22	19	13	GSBRNA2T00118515001:exon,GSBRNA2T00118515001:exon,GSBRNA2T00118515001:exon,GSBRNA2T00118515001:exon
chrA03_random	2564800	2565300	500	hyper	154	18	14	36	89.53	28	0.00017934	15	6	GSBRNA2T00118515001:exon,GSBRNA2T00118515001:exon
chrA03_random	2849800	2850300	500	hyper	85	17	62	72	83.33	46.27	0.0054299	13	16	GSBRNA2T00118551001:promoter
chrA03_random	2849800	2850300	500	hyper	85	17	62	72	83.33	46.27	0.0054299	13	16	GSBRNA2T00118551001:promoter
chrA03_random	3139200	3139700	500	hyper	39	85	0	82	31.45	0	1.3617e-06	8	7	GSBRNA2T00118587001:intron
chrA03_random	3165800	3166300	500	hyper	173	15	26	73	92.02	26.26	1.0677e-07	11	10	GSBRNA2T00118592001:exon
chrA03_random	3166500	3167000	500	hyper	73	13	0	34	84.88	0	5.4259e-07	8	5	GSBRNA2T00118592001:intron
chrA03_random	3170000	3171000	1000	hyper	210	23	0	207	90.13	0	2.1919e-33	18	17	GSBRNA2T00118592001:intron
chrA03_random	3173600	3174100	500	hyper	115	19	1	72	85.82	1.37	1.6847e-12	7	6	GSBRNA2T00118594001:promoter
chrA03_random	3173600	3174100	500	hyper	115	19	1	72	85.82	1.37	1.6847e-12	7	6	GSBRNA2T00118594001:promoter
chrA03_random	3177100	3177600	500	hyper	144	26	5	48	84.71	9.43	1.0522e-07	13	9	GSBRNA2T00118595001:promoter
chrA03_random	3177100	3177600	500	hyper	144	26	5	48	84.71	9.43	1.0522e-07	13	9	GSBRNA2T00118595001:promoter
chrA03_random	3178500	3179000	500	hyper	112	75	12	68	59.89	15	1.08e-05	19	11	GSBRNA2T00118595001:promoter
chrA03_random	3178500	3179000	500	hyper	112	75	12	68	59.89	15	1.08e-05	19	11	GSBRNA2T00118595001:promoter
chrA03_random	3247200	3248200	1000	hyper	385	37	22	156	91.23	12.36	2.7989e-21	26	17	GSBRNA2T00118601001:promoter
chrA03_random	3247200	3248200	1000	hyper	385	37	22	156	91.23	12.36	2.7989e-21	26	17	GSBRNA2T00118601001:promoter
chrA03_random	3361400	3362400	1000	hyper	129	14	15	49	90.21	23.44	6.0745e-06	13	11	GSBRNA2T00007012001:exon,GSBRNA2T00007012001:exon,GSBRNA2T00007012001:exon
chrA03_random	3459800	3460300	500	hyper	68	27	3	33	71.58	8.33	6.3884e-05	9	5	GSBRNA2T00014001001:promoter
chrA03_random	3459800	3460300	500	hyper	68	27	3	33	71.58	8.33	6.3884e-05	9	5	GSBRNA2T00014001001:promoter
chrA03_random	3465200	3466700	1500	hyper	484	61	10	299	88.81	3.24	7.1079e-46	39	29	GSBRNA2T00014002001:promoter,GSBRNA2T00014003001:promoter
chrA03_random	3465200	3466700	1500	hyper	484	61	10	299	88.81	3.24	7.1079e-46	39	29	GSBRNA2T00014002001:promoter,GSBRNA2T00014003001:promoter,GSBRNA2T00014002001:exon,GSBRNA2T00014002001:exon
chrA03_random	3583800	3584300	500	hyper	55	114	0	124	32.54	0	1.8161e-09	14	19	GSBRNA2T00027544001:promoter
chrA03_random	3583800	3584300	500	hyper	55	114	0	124	32.54	0	1.8161e-09	14	19	GSBRNA2T00027544001:promoter,GSBRNA2T00027544001:exon,GSBRNA2T00027544001:exon
chrA03_random	3712700	3713700	1000	hyper	103	15	0	107	87.29	0	1.5112e-17	12	15	GSBRNA2T00028596001:promoter
chrA03_random	3712700	3713700	1000	hyper	103	15	0	107	87.29	0	1.5112e-17	12	15	GSBRNA2T00028596001:promoter,GSBRNA2T00028596001:exon,GSBRNA2T00028596001:exon,GSBRNA2T00028596001:exon
chrA03_random	3925900	3926400	500	hyper	165	14	49	59	92.18	45.37	0.00043685	13	10	GSBRNA2T00028626001:promoter
chrA03_random	3925900	3926400	500	hyper	165	14	49	59	92.18	45.37	0.00043685	13	10	GSBRNA2T00028626001:promoter
chrA03_random	4084900	4085400	500	hyper	411	84	0	46	83.03	0	1.3632e-09	9	5	GSBRNA2T00028653001:promoter
chrA03_random	4084900	4085400	500	hyper	411	84	0	46	83.03	0	1.3632e-09	9	5	GSBRNA2T00028653001:promoter
chrA03_random	4281900	4282400	500	hyper	47	21	4	24	69.12	14.29	0.0028633	7	5	GSBRNA2T00035030001:exon,GSBRNA2T00035030001:exon,GSBRNA2T00035030001:exon
chrA03_random	4409200	4409700	500	hyper	121	5	1	24	96.03	4	1.0638e-05	22	5	GSBRNA2T00035044001:promoter
chrA03_random	4409200	4409700	500	hyper	121	5	1	24	96.03	4	1.0638e-05	22	5	GSBRNA2T00035044001:promoter
chrA03_random	4515600	4516100	500	hyper	152	26	33	82	85.39	28.7	8.1553e-07	13	12	GSBRNA2T00035058001:promoter,GSBRNA2T00035057001:promoter
chrA03_random	4515600	4516100	500	hyper	152	26	33	82	85.39	28.7	8.1553e-07	13	12	GSBRNA2T00035058001:promoter,GSBRNA2T00035057001:promoter
chrA03_random	4602300	4602800	500	hyper	49	2	6	29	96.08	17.14	0.00014513	7	5	GSBRNA2T00035074001:exon,GSBRNA2T00035074001:exon
chrA03_random	4692200	4693900	1700	hyper	148	14	0	74	91.36	0	3.4065e-14	15	11	GSBRNA2T00035089001:exon,GSBRNA2T00035090001:exon,GSBRNA2T00035090001:exon,GSBRNA2T00035090001:exon,GSBRNA2T00035090001:exon,GSBRNA2T00035090001:exon
chrA03_random	4877400	4877900	500	hyper	86	9	3	25	90.53	10.71	8.0093e-05	7	5	GSBRNA2T00051296001:promoter
chrA03_random	4877400	4877900	500	hyper	86	9	3	25	90.53	10.71	8.0093e-05	7	5	GSBRNA2T00051296001:promoter
chrA03_random	4898000	4899400	1400	hyper	78	8	0	80	90.7	0	7.5208e-14	13	12	GSBRNA2T00051299001:exon,GSBRNA2T00051299001:exon,GSBRNA2T00051299001:exon
chrA03_random	4937700	4938800	1100	hyper	154	43	2	122	78.17	1.61	3.9759e-18	17	16	GSBRNA2T00051303001:promoter
chrA03_random	4937700	4938800	1100	hyper	154	43	2	122	78.17	1.61	3.9759e-18	17	16	GSBRNA2T00051303001:promoter
chrA03_random	5060900	5061400	500	hyper	37	11	3	133	77.08	2.21	4.3255e-15	5	8	GSBRNA2T00051319001:promoter,GSBRNA2T00051318001:promoter,GSBRNA2T00051320001:promoter
chrA03_random	5060900	5061400	500	hyper	37	11	3	133	77.08	2.21	4.3255e-15	5	8	GSBRNA2T00051319001:promoter,GSBRNA2T00051318001:promoter,GSBRNA2T00051320001:promoter
chrA03_random	5066000	5066500	500	hyper	42	37	0	139	53.16	0	3.306e-14	8	15	GSBRNA2T00051321001:promoter,GSBRNA2T00051322001:promoter,GSBRNA2T00051323001:promoter
chrA03_random	5066000	5066500	500	hyper	42	37	0	139	53.16	0	3.306e-14	8	15	GSBRNA2T00051321001:promoter,GSBRNA2T00051322001:promoter,GSBRNA2T00051323001:promoter,GSBRNA2T00051321001:exon
chrA03_random	5113300	5114600	1300	hyper	231	33	0	136	87.5	0	1.4353e-23	25	14	GSBRNA2T00051331001:promoter
chrA03_random	5113300	5114600	1300	hyper	231	33	0	136	87.5	0	1.4353e-23	25	14	GSBRNA2T00051331001:promoter,GSBRNA2T00051331001:exon,GSBRNA2T00051331001:exon,GSBRNA2T00051331001:exon
chrA03_random	5181500	5182500	1000	hyper	150	53	23	85	73.89	21.3	3.6599e-07	17	17	GSBRNA2T00051341001:exon
chrA03_random	5351700	5352200	500	hyper	103	14	0	52	88.03	0	3.8584e-10	11	9	GSBRNA2T00051909001:promoter
chrA03_random	5351700	5352200	500	hyper	103	14	0	52	88.03	0	3.8584e-10	11	9	GSBRNA2T00051909001:promoter,GSBRNA2T00051908001:exon,GSBRNA2T00051909001:exon,GSBRNA2T00051909001:exon
chrA03_random	5388100	5388600	500	hyper	75	8	0	88	90.36	0	9.0467e-15	9	6	GSBRNA2T00051917001:exon
chrA03_random	5666200	5666700	500	hyper	34	6	3	52	85	5.45	2.2614e-07	6	7	GSBRNA2T00051946001:exon
chrA03_random	5729200	5729700	500	hyper	83	16	13	63	83.84	17.11	5.4261e-07	8	8	GSBRNA2T00051952001:promoter
chrA03_random	5729200	5729700	500	hyper	83	16	13	63	83.84	17.11	5.4261e-07	8	8	GSBRNA2T00051952001:promoter
chrA03_random	5786700	5787200	500	hyper	125	6	11	49	95.42	18.33	4.5967e-07	11	7	GSBRNA2T00074257001:promoter
chrA03_random	5786700	5787200	500	hyper	125	6	11	49	95.42	18.33	4.5967e-07	11	7	GSBRNA2T00074257001:promoter,GSBRNA2T00051959001:exon,GSBRNA2T00051959001:exon
chrA03_random	5924100	5925100	1000	hyper	393	147	0	239	72.78	0	8.3133e-35	21	13	GSBRNA2T00088365001:exon,GSBRNA2T00088366001:exon
chrA03_random	5925600	5926100	500	hyper	146	14	16	25	91.25	39.02	0.0061632	17	8	GSBRNA2T00088366001:intron
chrA03_random	5926600	5927600	1000	hyper	227	49	0	74	82.25	0	1.172e-13	21	10	GSBRNA2T00088366001:promoter
chrA03_random	5926600	5927600	1000	hyper	227	49	0	74	82.25	0	1.172e-13	21	10	GSBRNA2T00088366001:promoter,GSBRNA2T00088366001:exon
chrA03_random	5981600	5982100	500	hyper	82	11	5	42	88.17	10.64	1.2347e-06	6	6	GSBRNA2T00014851001:intron
chrA04	20100	20600	500	hyper	99	10	4	67	90.83	5.63	6.9527e-11	6	6	GSBRNA2T00149344001:promoter
chrA04	20100	20600	500	hyper	99	10	4	67	90.83	5.63	6.9527e-11	6	6	GSBRNA2T00149344001:promoter
chrA04	165200	165700	500	hyper	121	13	0	50	90.3	0	3.5834e-10	5	5	GSBRNA2T00149316001:promoter
chrA04	165200	165700	500	hyper	121	13	0	50	90.3	0	3.5834e-10	5	5	GSBRNA2T00149316001:promoter
chrA04	528100	528600	500	hyper	90	11	9	28	89.11	24.32	0.00066929	7	5	GSBRNA2T00149252001:exon,GSBRNA2T00149252001:exon,GSBRNA2T00149252001:exon,GSBRNA2T00149252001:exon
chrA04	539300	539800	500	hyper	12	32	0	30	27.27	0	0.0062699	7	6	GSBRNA2T00149248001:exon
chrA04	546200	546700	500	hyper	46	5	0	66	90.2	0	4.019e-11	6	6	GSBRNA2T00149245001:exon,GSBRNA2T00149245001:exon
chrA04	697100	697600	500	hyper	49	33	0	35	59.76	0	1.634e-05	11	5	GSBRNA2T00149207001:exon,GSBRNA2T00149207001:exon
chrA04	698100	698600	500	hyper	33	8	2	50	80.49	3.85	2.9614e-07	5	5	GSBRNA2T00149207001:exon
chrA04	720400	720900	500	hyper	65	94	1	91	40.88	1.09	2.4197e-08	13	9	GSBRNA2T00149205001:promoter
chrA04	720400	720900	500	hyper	65	94	1	91	40.88	1.09	2.4197e-08	13	9	GSBRNA2T00149205001:promoter
chrA04	760700	762200	1500	hyper	388	60	0	246	86.61	0	1.3224e-40	28	20	GSBRNA2T00149195001:promoter
chrA04	760700	762200	1500	hyper	388	60	0	246	86.61	0	1.3224e-40	28	20	GSBRNA2T00149195001:promoter
chrA04	913400	913900	500	hyper	23	26	0	34	46.94	0	0.00019582	5	5	GSBRNA2T00149163001:exon,GSBRNA2T00149163001:exon,GSBRNA2T00149163001:exon
chrA04	1076500	1077000	500	hyper	27	30	0	51	47.37	0	5.991e-06	7	5	GSBRNA2T00149135001:promoter
chrA04	1076500	1077000	500	hyper	27	30	0	51	47.37	0	5.991e-06	7	5	GSBRNA2T00149135001:promoter,GSBRNA2T00149134001:exon,GSBRNA2T00149134001:exon,GSBRNA2T00149134001:exon,GSBRNA2T00149134001:exon
chrA04	1150300	1150800	500	hyper	236	20	0	30	92.19	0	2.9768e-07	21	5	GSBRNA2T00149121001:promoter
chrA04	1150300	1150800	500	hyper	236	20	0	30	92.19	0	2.9768e-07	21	5	GSBRNA2T00149121001:promoter
chrA04	1186400	1186900	500	hyper	47	15	14	48	75.81	22.58	0.00043881	7	8	GSBRNA2T00149116001:promoter,GSBRNA2T00149115001:promoter
chrA04	1186400	1186900	500	hyper	47	15	14	48	75.81	22.58	0.00043881	7	8	GSBRNA2T00149116001:promoter,GSBRNA2T00149115001:promoter
chrA04	1202900	1203400	500	hyper	24	1	27	82	96	24.77	9.1509e-05	5	16	GSBRNA2T00149111001:promoter
chrA04	1202900	1203400	500	hyper	24	1	27	82	96	24.77	9.1509e-05	5	16	GSBRNA2T00149111001:promoter,GSBRNA2T00149111001:exon
chrA04	1275700	1276200	500	hyper	14	45	0	53	23.73	0	0.00072076	7	7	GSBRNA2T00149091001:exon,GSBRNA2T00149091001:exon
chrA04	1341300	1341800	500	hyper	54	30	6	45	64.29	11.76	8.2772e-05	12	8	GSBRNA2T00149079001:promoter
chrA04	1341300	1341800	500	hyper	54	30	6	45	64.29	11.76	8.2772e-05	12	8	GSBRNA2T00149079001:promoter,GSBRNA2T00149080001:exon
chrA04	1576200	1576700	500	hyper	35	13	0	28	72.92	0	3.286e-05	6	5	GSBRNA2T00149043001:promoter
chrA04	1576200	1576700	500	hyper	35	13	0	28	72.92	0	3.286e-05	6	5	GSBRNA2T00149043001:promoter,GSBRNA2T00149044001:exon
chrA04	2036000	2036500	500	hyper	97	10	2	54	90.65	3.57	9.8122e-10	7	6	GSBRNA2T00126279001:promoter
chrA04	2036000	2036500	500	hyper	97	10	2	54	90.65	3.57	9.8122e-10	7	6	GSBRNA2T00126279001:promoter
chrA04	2050900	2051400	500	hyper	174	26	54	99	87	35.29	1.3557e-06	13	13	GSBRNA2T00126281001:promoter
chrA04	2050900	2051400	500	hyper	174	26	54	99	87	35.29	1.3557e-06	13	13	GSBRNA2T00126281001:promoter
chrA04	2090800	2091300	500	hyper	81	17	6	52	82.65	10.34	2.7746e-07	6	5	GSBRNA2T00126292001:promoter
chrA04	2090800	2091300	500	hyper	81	17	6	52	82.65	10.34	2.7746e-07	6	5	GSBRNA2T00126292001:promoter
chrA04	2146400	2146900	500	hyper	115	7	14	35	94.26	28.57	0.00017834	15	8	GSBRNA2T00126306001:promoter
chrA04	2146400	2146900	500	hyper	115	7	14	35	94.26	28.57	0.00017834	15	8	GSBRNA2T00126306001:promoter
chrA04	2325200	2326700	1500	hyper	413	32	18	178	92.81	9.18	2.8825e-26	28	22	GSBRNA2T00126336001:promoter
chrA04	2325200	2326700	1500	hyper	413	32	18	178	92.81	9.18	2.8825e-26	28	22	GSBRNA2T00126336001:promoter
chrA04	2765500	2766500	1000	hyper	232	52	19	109	81.69	14.84	1.6096e-12	19	16	GSBRNA2T00126411001:promoter
chrA04	2765500	2766500	1000	hyper	232	52	19	109	81.69	14.84	1.6096e-12	19	16	GSBRNA2T00126411001:promoter,GSBRNA2T00126411001:exon,GSBRNA2T00126411001:exon
chrA04	3261200	3261700	500	hyper	111	34	0	154	76.55	0	1.0814e-21	9	7	GSBRNA2T00126480001:promoter
chrA04	3261200	3261700	500	hyper	111	34	0	154	76.55	0	1.0814e-21	9	7	GSBRNA2T00126480001:promoter
chrA04	3270500	3271000	500	hyper	84	17	0	28	83.17	0	4.6119e-06	15	5	GSBRNA2T00126483001:promoter
chrA04	3270500	3271000	500	hyper	84	17	0	28	83.17	0	4.6119e-06	15	5	GSBRNA2T00126483001:promoter
chrA04	3305700	3306200	500	hyper	130	6	0	56	95.59	0	1.245e-11	7	5	GSBRNA2T00126490001:promoter
chrA04	3305700	3306200	500	hyper	130	6	0	56	95.59	0	1.245e-11	7	5	GSBRNA2T00126490001:promoter
chrA04	3386200	3387200	1000	hyper	217	19	0	120	91.95	0	6.6563e-22	29	18	GSBRNA2T00126500001:promoter
chrA04	3386200	3387200	1000	hyper	217	19	0	120	91.95	0	6.6563e-22	29	18	GSBRNA2T00126500001:promoter,GSBRNA2T00126500001:exon
chrA04	3515800	3516300	500	hyper	38	24	0	65	61.29	0	1.4715e-08	10	7	GSBRNA2T00126532001:promoter
chrA04	3515800	3516300	500	hyper	38	24	0	65	61.29	0	1.4715e-08	10	7	GSBRNA2T00126532001:promoter,GSBRNA2T00126532001:exon
chrA04	4108600	4109100	500	hyper	40	84	0	62	32.26	0	1.8152e-05	14	10	GSBRNA2T00021776001:exon,GSBRNA2T00021776001:exon
chrA04	4112500	4113000	500	hyper	200	12	10	28	94.34	26.32	0.00026467	18	6	GSBRNA2T00021775001:promoter,GSBRNA2T00021774001:promoter
chrA04	4112500	4113000	500	hyper	200	12	10	28	94.34	26.32	0.00026467	18	6	GSBRNA2T00021775001:promoter,GSBRNA2T00021774001:promoter
chrA04	4351000	4352000	1000	hyper	385	19	132	177	95.3	42.72	1.2958e-10	19	24	GSBRNA2T00021736001:promoter,GSBRNA2T00021737001:promoter
chrA04	4351000	4352000	1000	hyper	385	19	132	177	95.3	42.72	1.2958e-10	19	24	GSBRNA2T00021736001:promoter,GSBRNA2T00021737001:promoter
chrA04	4352500	4353000	500	hyper	121	10	5	31	92.37	13.89	1.735e-05	9	5	GSBRNA2T00021736001:exon
chrA04	4362400	4362900	500	hyper	127	13	21	34	90.71	38.18	0.0019637	10	9	GSBRNA2T00021735001:promoter,GSBRNA2T00021734001:promoter
chrA04	4362400	4362900	500	hyper	127	13	21	34	90.71	38.18	0.0019637	10	9	GSBRNA2T00021735001:promoter,GSBRNA2T00021734001:promoter
chrA04	4383000	4383500	500	hyper	36	11	1	78	76.6	1.27	1.3786e-10	8	10	GSBRNA2T00021731001:exon
chrA04	4442800	4443300	500	hyper	45	11	14	74	80.36	15.91	1.3193e-06	6	10	GSBRNA2T00021718001:promoter
chrA04	4442800	4443300	500	hyper	45	11	14	74	80.36	15.91	1.3193e-06	6	10	GSBRNA2T00021718001:promoter
chrA04	4660700	4661200	500	hyper	64	6	0	64	91.43	0	1.8098e-11	7	6	GSBRNA2T00111322001:promoter
chrA04	4660700	4661200	500	hyper	64	6	0	64	91.43	0	1.8098e-11	7	6	GSBRNA2T00111322001:promoter
chrA04	4665800	4667800	2000	hyper	93	154	13	94	37.65	12.15	0.00022033	29	14	GSBRNA2T00111321001:promoter
chrA04	4665800	4667800	2000	hyper	93	154	13	94	37.65	12.15	0.00022033	29	14	GSBRNA2T00111321001:promoter
chrA04	4672300	4672800	500	hyper	72	50	0	93	59.02	0	1.1386e-11	8	8	GSBRNA2T00111320001:intron
chrA04	4763800	4764300	500	hyper	50	7	0	153	87.72	0	5.0374e-21	6	10	GSBRNA2T00111306001:exon,GSBRNA2T00111306001:exon
chrA04	5043300	5043800	500	hyper	25	1	0	39	96.15	0	2.6758e-07	5	5	GSBRNA2T00111268001:promoter
chrA04	5043300	5043800	500	hyper	25	1	0	39	96.15	0	2.6758e-07	5	5	GSBRNA2T00111268001:promoter
chrA04	5078300	5079300	1000	hyper	149	123	0	125	54.78	0	6.1788e-15	18	13	GSBRNA2T00111260001:promoter
chrA04	5078300	5079300	1000	hyper	149	123	0	125	54.78	0	6.1788e-15	18	13	GSBRNA2T00111260001:promoter
chrA04	5419300	5420400	1100	hyper	170	32	0	67	84.16	0	1.5626e-12	20	10	GSBRNA2T00111211001:promoter
chrA04	5419300	5420400	1100	hyper	170	32	0	67	84.16	0	1.5626e-12	20	10	GSBRNA2T00111211001:promoter
chrA04	5763700	5764200	500	hyper	65	68	0	57	48.87	0	5.4049e-07	9	6	GSBRNA2T00111171001:exon,GSBRNA2T00111170001:exon
chrA04	5976000	5977700	1700	hyper	337	71	76	168	82.6	31.15	4.1888e-11	40	25	GSBRNA2T00068476001:promoter
chrA04	5976000	5977700	1700	hyper	337	71	76	168	82.6	31.15	4.1888e-11	40	25	GSBRNA2T00068476001:promoter
chrA04	7287500	7288000	500	hyper	55	15	20	66	78.57	23.26	4.8054e-05	6	7	GSBRNA2T00114505001:exon
chrA04	7355800	7356300	500	hyper	121	25	0	114	82.88	0	3.292e-18	7	6	GSBRNA2T00114492001:promoter
chrA04	7355800	7356300	500	hyper	121	25	0	114	82.88	0	3.292e-18	7	6	GSBRNA2T00114492001:promoter
chrA04	7539200	7539700	500	hyper	73	6	0	37	92.41	0	7.4178e-08	6	5	GSBRNA2T00114460001:promoter
chrA04	7539200	7539700	500	hyper	73	6	0	37	92.41	0	7.4178e-08	6	5	GSBRNA2T00114460001:promoter,GSBRNA2T00114461001:exon
chrA04	8090600	8091600	1000	hyper	238	146	35	95	61.98	26.92	4.2959e-05	40	20	GSBRNA2T00114373001:exon
chrA04	8363100	8363600	500	hyper	47	4	12	24	92.16	33.33	0.0079141	8	5	GSBRNA2T00114333001:promoter
chrA04	8363100	8363600	500	hyper	47	4	12	24	92.16	33.33	0.0079141	8	5	GSBRNA2T00114333001:promoter
chrA04	8746200	8748000	1800	hyper	405	64	21	241	86.35	8.02	4.0018e-32	24	19	GSBRNA2T00114262001:intron
chrA04	9309000	9309500	500	hyper	53	73	0	51	42.06	0	9.4367e-06	10	6	GSBRNA2T00007627001:intron
chrA04	9515500	9516000	500	hyper	152	72	0	230	67.86	0	7.9774e-29	5	5	GSBRNA2T00068550001:promoter
chrA04	9515500	9516000	500	hyper	152	72	0	230	67.86	0	7.9774e-29	5	5	GSBRNA2T00068550001:promoter,GSBRNA2T00068549001:exon,GSBRNA2T00068549001:exon
chrA04	9778300	9778800	500	hyper	17	26	0	44	39.53	0	0.0001132	6	8	GSBRNA2T00068507001:intron
chrA04	9979800	9980300	500	hyper	41	43	0	43	48.81	0	1.5645e-05	13	8	GSBRNA2T00090338001:promoter
chrA04	9979800	9980300	500	hyper	41	43	0	43	48.81	0	1.5645e-05	13	8	GSBRNA2T00090338001:promoter,GSBRNA2T00090338001:exon
chrA04	10090600	10091100	500	hyper	60	45	1	55	57.14	1.79	4.5053e-07	6	6	GSBRNA2T00090313001:promoter
chrA04	10090600	10091100	500	hyper	60	45	1	55	57.14	1.79	4.5053e-07	6	6	GSBRNA2T00090313001:promoter
chrA04	10176800	10177300	500	hyper	33	18	0	50	64.71	0	3.3083e-07	6	6	GSBRNA2T00090293001:promoter
chrA04	10176800	10177300	500	hyper	33	18	0	50	64.71	0	3.3083e-07	6	6	GSBRNA2T00090293001:promoter
chrA04	10181100	10181600	500	hyper	20	17	0	61	54.05	0	3.8431e-07	5	6	GSBRNA2T00090293001:exon,GSBRNA2T00090293001:exon,GSBRNA2T00090293001:exon
chrA04	10262400	10262900	500	hyper	127	34	0	45	78.88	0	1.4814e-08	7	6	GSBRNA2T00090272001:promoter
chrA04	10262400	10262900	500	hyper	127	34	0	45	78.88	0	1.4814e-08	7	6	GSBRNA2T00090272001:promoter,GSBRNA2T00090271001:exon
chrA04	10320400	10321900	1500	hyper	999	61	20	378	94.25	5.03	1.2155e-61	32	34	GSBRNA2T00090269001:promoter
chrA04	10320400	10321900	1500	hyper	999	61	20	378	94.25	5.03	1.2155e-61	32	34	GSBRNA2T00090269001:promoter,GSBRNA2T00090269001:exon,GSBRNA2T00090269001:exon,GSBRNA2T00090269001:exon,GSBRNA2T00090269001:exon,GSBRNA2T00090268001:exon,GSBRNA2T00090268001:exon
chrA04	10597100	10598100	1000	hyper	91	116	0	95	43.96	0	8.0354e-10	18	12	GSBRNA2T00090203001:promoter
chrA04	10597100	10598100	1000	hyper	91	116	0	95	43.96	0	8.0354e-10	18	12	GSBRNA2T00090203001:promoter
chrA04	10640300	10640800	500	hyper	23	28	0	64	45.1	0	1.0305e-06	6	8	GSBRNA2T00090196001:promoter
chrA04	10640300	10640800	500	hyper	23	28	0	64	45.1	0	1.0305e-06	6	8	GSBRNA2T00090196001:promoter,GSBRNA2T00090195001:exon,GSBRNA2T00090195001:exon
chrA04	10821400	10821900	500	hyper	81	8	17	81	91.01	17.35	1.0017e-08	9	7	GSBRNA2T00032857001:exon
chrA04	11078800	11079300	500	hyper	34	36	0	87	48.57	0	4.0453e-09	9	8	GSBRNA2T00032910001:promoter
chrA04	11078800	11079300	500	hyper	34	36	0	87	48.57	0	4.0453e-09	9	8	GSBRNA2T00032910001:promoter
chrA04	11177000	11178500	1500	hyper	220	57	61	138	79.42	30.65	1.8437e-08	25	23	GSBRNA2T00032919001:promoter
chrA04	11177000	11178500	1500	hyper	220	57	61	138	79.42	30.65	1.8437e-08	25	23	GSBRNA2T00032919001:promoter
chrA04	11292200	11292700	500	hyper	59	59	0	135	50	0	9.3741e-14	13	17	GSBRNA2T00032940001:promoter
chrA04	11292200	11292700	500	hyper	59	59	0	135	50	0	9.3741e-14	13	17	GSBRNA2T00032940001:promoter
chrA04	11302600	11304600	2000	hyper	302	48	96	162	86.29	37.21	2.7212e-09	33	30	GSBRNA2T00032942001:promoter
chrA04	11302600	11304600	2000	hyper	302	48	96	162	86.29	37.21	2.7212e-09	33	30	GSBRNA2T00032942001:promoter
chrA04	11334000	11334500	500	hyper	46	12	0	47	79.31	0	4.559e-08	6	5	GSBRNA2T00066957001:promoter
chrA04	11334000	11334500	500	hyper	46	12	0	47	79.31	0	4.559e-08	6	5	GSBRNA2T00066957001:promoter
chrA04	11402800	11403300	500	hyper	60	3	0	73	95.24	0	7.8474e-13	5	5	GSBRNA2T00066969001:promoter
chrA04	11402800	11403300	500	hyper	60	3	0	73	95.24	0	7.8474e-13	5	5	GSBRNA2T00066969001:promoter
chrA04	11482500	11483000	500	hyper	54	23	2	65	70.13	2.99	9.5824e-09	5	5	GSBRNA2T00066985001:promoter
chrA04	11482500	11483000	500	hyper	54	23	2	65	70.13	2.99	9.5824e-09	5	5	GSBRNA2T00066985001:promoter
chrA04	11515600	11516100	500	hyper	39	6	0	44	86.67	0	5.9476e-08	5	6	GSBRNA2T00066990001:promoter
chrA04	11515600	11516100	500	hyper	39	6	0	44	86.67	0	5.9476e-08	5	6	GSBRNA2T00066990001:promoter
chrA04	11619500	11620000	500	hyper	59	16	0	73	78.67	0	2.0161e-11	7	6	GSBRNA2T00067007001:promoter
chrA04	11619500	11620000	500	hyper	59	16	0	73	78.67	0	2.0161e-11	7	6	GSBRNA2T00067007001:promoter
chrA04	11690000	11690500	500	hyper	64	76	2	35	45.71	5.41	0.00073496	13	6	GSBRNA2T00068245001:exon
chrA04	11693900	11694400	500	hyper	73	9	22	45	89.02	32.84	0.00055899	8	6	GSBRNA2T00068245001:promoter
chrA04	11693900	11694400	500	hyper	73	9	22	45	89.02	32.84	0.00055899	8	6	GSBRNA2T00068245001:promoter
chrA04	11732000	11732500	500	hyper	100	8	34	69	92.59	33.01	1.4433e-05	7	7	GSBRNA2T00068249001:promoter
chrA04	11732000	11732500	500	hyper	100	8	34	69	92.59	33.01	1.4433e-05	7	7	GSBRNA2T00068249001:promoter
chrA04	11763000	11764000	1000	hyper	257	32	0	64	88.93	0	5.3924e-13	23	10	GSBRNA2T00068254001:exon,GSBRNA2T00068254001:exon
chrA04	11801900	11802400	500	hyper	59	5	0	42	92.19	0	2.1437e-08	7	5	GSBRNA2T00068262001:promoter
chrA04	11801900	11802400	500	hyper	59	5	0	42	92.19	0	2.1437e-08	7	5	GSBRNA2T00068262001:promoter,GSBRNA2T00068261001:exon
chrA04	11859800	11860800	1000	hyper	63	27	0	116	70	0	2.8429e-15	11	12	GSBRNA2T00068275001:promoter
chrA04	11859800	11860800	1000	hyper	63	27	0	116	70	0	2.8429e-15	11	12	GSBRNA2T00068275001:promoter
chrA04	11907100	11907600	500	hyper	127	34	13	86	78.88	13.13	9.538e-10	8	8	GSBRNA2T00068286001:promoter
chrA04	11907100	11907600	500	hyper	127	34	13	86	78.88	13.13	9.538e-10	8	8	GSBRNA2T00068286001:promoter
chrA04	12472400	12472900	500	hyper	15	35	0	59	30	0	8.2984e-05	5	5	GSBRNA2T00058334001:exon,GSBRNA2T00058334001:exon
chrA04	12572300	12572800	500	hyper	106	53	4	168	66.67	2.33	3.049e-19	9	10	GSBRNA2T00058312001:promoter
chrA04	12572300	12572800	500	hyper	106	53	4	168	66.67	2.33	3.049e-19	9	10	GSBRNA2T00058312001:promoter
chrA04	12619400	12619900	500	hyper	50	99	0	93	33.56	0	1.097e-07	10	7	GSBRNA2T00058304001:promoter
chrA04	12619400	12619900	500	hyper	50	99	0	93	33.56	0	1.097e-07	10	7	GSBRNA2T00058304001:promoter
chrA04	12695100	12695600	500	hyper	31	52	0	118	37.35	0	1.1593e-09	8	9	GSBRNA2T00058288001:exon,GSBRNA2T00058288001:exon
chrA04	12780600	12781100	500	hyper	36	37	2	40	49.32	4.76	0.00022358	8	5	GSBRNA2T00088988001:promoter
chrA04	12780600	12781100	500	hyper	36	37	2	40	49.32	4.76	0.00022358	8	5	GSBRNA2T00088988001:promoter
chrA04	12808100	12808600	500	hyper	12	26	0	59	31.58	0	6.6365e-05	6	8	GSBRNA2T00088993001:exon,GSBRNA2T00088993001:exon
chrA04	12825600	12826100	500	hyper	56	15	0	80	78.87	0	3.5511e-12	7	7	GSBRNA2T00088997001:promoter,GSBRNA2T00088996001:promoter
chrA04	12825600	12826100	500	hyper	56	15	0	80	78.87	0	3.5511e-12	7	7	GSBRNA2T00088997001:promoter,GSBRNA2T00088996001:promoter
chrA04	13074300	13074800	500	hyper	83	21	31	83	79.81	27.19	1.1948e-05	6	8	GSBRNA2T00045271001:promoter
chrA04	13074300	13074800	500	hyper	83	21	31	83	79.81	27.19	1.1948e-05	6	8	GSBRNA2T00045271001:promoter
chrA04	13087600	13088100	500	hyper	37	10	0	26	78.72	0	3.2649e-05	5	5	GSBRNA2T00045268001:exon
chrA04	13212200	13212700	500	hyper	95	27	7	54	77.87	11.48	5.0067e-07	7	5	GSBRNA2T00045237001:promoter
chrA04	13212200	13212700	500	hyper	95	27	7	54	77.87	11.48	5.0067e-07	7	5	GSBRNA2T00045237001:promoter
chrA04	13254500	13257500	3000	hyper	875	113	10	834	88.56	1.18	0	62	57	GSBRNA2T00045229001:promoter
chrA04	13254500	13257500	3000	hyper	875	113	10	834	88.56	1.18	0	62	57	GSBRNA2T00045229001:promoter,GSBRNA2T00045229001:exon,GSBRNA2T00045229001:exon
chrA04	13317700	13318200	500	hyper	44	12	0	60	78.57	0	1.5957e-09	7	6	GSBRNA2T00045215001:promoter
chrA04	13317700	13318200	500	hyper	44	12	0	60	78.57	0	1.5957e-09	7	6	GSBRNA2T00045215001:promoter
chrA04	13373300	13373800	500	hyper	65	89	0	79	42.21	0	4.3459e-08	14	7	GSBRNA2T00045210001:promoter,GSBRNA2T00045211001:promoter
chrA04	13373300	13373800	500	hyper	65	89	0	79	42.21	0	4.3459e-08	14	7	GSBRNA2T00045210001:promoter,GSBRNA2T00045211001:promoter
chrA04	13501300	13501800	500	hyper	101	17	18	58	85.59	23.68	6.6158e-06	8	8	GSBRNA2T00050346001:promoter
chrA04	13501300	13501800	500	hyper	101	17	18	58	85.59	23.68	6.6158e-06	8	8	GSBRNA2T00050346001:promoter
chrA04	13674900	13675900	1000	hyper	246	14	45	66	94.62	40.54	1.3638e-05	21	16	GSBRNA2T00050378001:promoter
chrA04	13674900	13675900	1000	hyper	246	14	45	66	94.62	40.54	1.3638e-05	21	16	GSBRNA2T00050378001:promoter
chrA04	13703000	13703500	500	hyper	40	9	0	45	81.63	0	7.8978e-08	7	9	GSBRNA2T00050381001:promoter
chrA04	13703000	13703500	500	hyper	40	9	0	45	81.63	0	7.8978e-08	7	9	GSBRNA2T00050381001:promoter
chrA04	13821600	13823800	2200	hyper	1309	133	1	214	90.78	0.47	4.1006e-41	78	23	GSBRNA2T00050410001:promoter,GSBRNA2T00050411001:promoter
chrA04	13821600	13823800	2200	hyper	1309	133	1	214	90.78	0.47	4.1006e-41	78	23	GSBRNA2T00050410001:promoter,GSBRNA2T00050411001:promoter,GSBRNA2T00050411001:exon,GSBRNA2T00050411001:exon,GSBRNA2T00050410001:exon,GSBRNA2T00050410001:exon
chrA04	13831300	13832300	1000	hyper	440	46	0	68	90.53	0	2.6571e-14	27	11	GSBRNA2T00050413001:exon,GSBRNA2T00050413001:exon
chrA04	13832900	13833900	1000	hyper	579	66	53	58	89.77	47.75	0.00029565	32	14	GSBRNA2T00050413001:promoter,GSBRNA2T00050414001:promoter
chrA04	13832900	13833900	1000	hyper	579	66	53	58	89.77	47.75	0.00029565	32	14	GSBRNA2T00050413001:promoter,GSBRNA2T00050414001:promoter,GSBRNA2T00050414001:exon,GSBRNA2T00050414001:exon,GSBRNA2T00050413001:exon
chrA04	13991800	13992300	500	hyper	36	16	0	39	69.23	0	2.3734e-06	7	5	GSBRNA2T00043492001:exon,GSBRNA2T00043492001:exon
chrA04	14004400	14004900	500	hyper	78	6	0	62	92.86	0	1.3096e-11	8	5	GSBRNA2T00043489001:promoter
chrA04	14004400	14004900	500	hyper	78	6	0	62	92.86	0	1.3096e-11	8	5	GSBRNA2T00043489001:promoter
chrA04	14041500	14042000	500	hyper	46	5	12	58	90.2	17.14	3.0092e-06	6	7	GSBRNA2T00043482001:promoter
chrA04	14041500	14042000	500	hyper	46	5	12	58	90.2	17.14	3.0092e-06	6	7	GSBRNA2T00043482001:promoter
chrA04	14115500	14116000	500	hyper	27	37	0	37	42.19	0	0.0001915	12	5	GSBRNA2T00043469001:promoter,GSBRNA2T00043468001:promoter
chrA04	14115500	14116000	500	hyper	27	37	0	37	42.19	0	0.0001915	12	5	GSBRNA2T00043469001:promoter,GSBRNA2T00043468001:promoter,GSBRNA2T00043468001:exon
chrA04	14135000	14135500	500	hyper	40	3	33	114	93.02	22.45	5.016e-07	7	11	GSBRNA2T00043461001:exon
chrA04	14251500	14252000	500	hyper	42	11	0	129	79.25	0	5.3785e-17	6	9	GSBRNA2T00043437001:promoter
chrA04	14251500	14252000	500	hyper	42	11	0	129	79.25	0	5.3785e-17	6	9	GSBRNA2T00043437001:promoter
chrA04	14277500	14278000	500	hyper	25	21	0	32	54.35	0	0.00011463	6	6	GSBRNA2T00043428001:promoter
chrA04	14277500	14278000	500	hyper	25	21	0	32	54.35	0	0.00011463	6	6	GSBRNA2T00043428001:promoter,GSBRNA2T00043428001:exon
chrA04	14374600	14375100	500	hyper	43	4	8	90	91.49	8.16	1.5826e-10	5	10	GSBRNA2T00043403001:promoter,GSBRNA2T00043401001:promoter
chrA04	14374600	14375100	500	hyper	43	4	8	90	91.49	8.16	1.5826e-10	5	10	GSBRNA2T00043403001:promoter,GSBRNA2T00043401001:promoter
chrA04	14392500	14393500	1000	hyper	249	118	0	108	67.85	0	3.4274e-16	29	15	GSBRNA2T00043398001:promoter
chrA04	14392500	14393500	1000	hyper	249	118	0	108	67.85	0	3.4274e-16	29	15	GSBRNA2T00043398001:promoter
chrA04	14393500	14394000	500	hyper	176	10	0	36	94.62	0	2.1228e-08	10	5	GSBRNA2T00043398001:promoter
chrA04	14393500	14394000	500	hyper	176	10	0	36	94.62	0	2.1228e-08	10	5	GSBRNA2T00043398001:promoter
chrA04	14604400	14604900	500	hyper	124	9	76	58	93.23	56.72	0.0087995	14	13	GSBRNA2T00006343001:promoter
chrA04	14604400	14604900	500	hyper	124	9	76	58	93.23	56.72	0.0087995	14	13	GSBRNA2T00006343001:promoter,GSBRNA2T00006343001:exon
chrA04	14632700	14633200	500	hyper	45	41	10	108	52.33	8.47	1.7774e-07	10	12	GSBRNA2T00006351001:promoter
chrA04	14632700	14633200	500	hyper	45	41	10	108	52.33	8.47	1.7774e-07	10	12	GSBRNA2T00006351001:promoter,GSBRNA2T00006351001:exon
chrA04	14738000	14738500	500	hyper	37	41	0	94	47.44	0	1.3434e-09	5	6	GSBRNA2T00006382001:promoter
chrA04	14738000	14738500	500	hyper	37	41	0	94	47.44	0	1.3434e-09	5	6	GSBRNA2T00006382001:promoter
chrA04	14756500	14757000	500	hyper	27	47	0	36	36.49	0	0.00053603	8	5	GSBRNA2T00006388001:promoter
chrA04	14756500	14757000	500	hyper	27	47	0	36	36.49	0	0.00053603	8	5	GSBRNA2T00006388001:promoter
chrA04	14757800	14758300	500	hyper	152	70	6	58	68.47	9.38	2.6952e-07	15	7	GSBRNA2T00006388001:promoter,GSBRNA2T00006389001:promoter
chrA04	14757800	14758300	500	hyper	152	70	6	58	68.47	9.38	2.6952e-07	15	7	GSBRNA2T00006388001:promoter,GSBRNA2T00006389001:promoter,GSBRNA2T00006388001:exon
chrA04	14763400	14763900	500	hyper	32	1	6	26	96.97	18.75	0.000689	5	5	GSBRNA2T00006391001:promoter,GSBRNA2T00006390001:promoter
chrA04	14763400	14763900	500	hyper	32	1	6	26	96.97	18.75	0.000689	5	5	GSBRNA2T00006391001:promoter,GSBRNA2T00006390001:promoter,GSBRNA2T00006390001:exon,GSBRNA2T00006390001:exon
chrA04	15000500	15001500	1000	hyper	137	69	0	126	66.5	0	3.4064e-17	15	12	GSBRNA2T00006432001:promoter
chrA04	15000500	15001500	1000	hyper	137	69	0	126	66.5	0	3.4064e-17	15	12	GSBRNA2T00006432001:promoter,GSBRNA2T00006432001:exon,GSBRNA2T00006432001:exon,GSBRNA2T00006432001:exon
chrA04	15003300	15003800	500	hyper	93	8	0	70	92.08	0	6.1238e-13	14	5	GSBRNA2T00006432001:exon
chrA04	15117300	15117800	500	hyper	51	2	5	20	96.23	20	0.0015399	9	5	GSBRNA2T00006451001:exon
chrA04	15147900	15148400	500	hyper	58	13	1	78	81.69	1.27	8.8584e-12	7	8	GSBRNA2T00006460001:promoter
chrA04	15147900	15148400	500	hyper	58	13	1	78	81.69	1.27	8.8584e-12	7	8	GSBRNA2T00006460001:promoter
chrA04	15313800	15314300	500	hyper	57	34	0	44	62.64	0	9.1418e-07	6	5	GSBRNA2T00064626001:promoter,GSBRNA2T00064625001:promoter
chrA04	15313800	15314300	500	hyper	57	34	0	44	62.64	0	9.1418e-07	6	5	GSBRNA2T00064626001:promoter,GSBRNA2T00064625001:promoter
chrA04	15338500	15339500	1000	hyper	106	24	39	90	81.54	30.23	7.4037e-06	14	15	GSBRNA2T00064615001:promoter
chrA04	15338500	15339500	1000	hyper	106	24	39	90	81.54	30.23	7.4037e-06	14	15	GSBRNA2T00064615001:promoter
chrA04	15344200	15344700	500	hyper	126	6	0	45	95.45	0	8.5905e-10	8	7	GSBRNA2T00064614001:promoter
chrA04	15344200	15344700	500	hyper	126	6	0	45	95.45	0	8.5905e-10	8	7	GSBRNA2T00064614001:promoter
chrA04	15592300	15592800	500	hyper	106	4	21	39	96.36	35	0.00032918	5	6	GSBRNA2T00077024001:exon,GSBRNA2T00077024001:exon
chrA04	15598900	15599900	1000	hyper	57	76	0	89	42.86	0	6.9263e-09	13	12	GSBRNA2T00077022001:promoter
chrA04	15598900	15599900	1000	hyper	57	76	0	89	42.86	0	6.9263e-09	13	12	GSBRNA2T00077022001:promoter
chrA04	16142600	16143100	500	hyper	67	22	15	106	75.28	12.4	1.4108e-09	5	5	GSBRNA2T00005475001:promoter
chrA04	16142600	16143100	500	hyper	67	22	15	106	75.28	12.4	1.4108e-09	5	5	GSBRNA2T00005475001:promoter
chrA04	16718600	16719100	500	hyper	23	60	0	32	27.71	0	0.0038951	7	5	GSBRNA2T00005365001:promoter
chrA04	16718600	16719100	500	hyper	23	60	0	32	27.71	0	0.0038951	7	5	GSBRNA2T00005365001:promoter,GSBRNA2T00005364001:exon,GSBRNA2T00005365001:exon
chrA04	16720000	16720500	500	hyper	48	20	0	31	70.59	0	1.2754e-05	6	5	GSBRNA2T00005365001:promoter,GSBRNA2T00005364001:promoter
chrA04	16720000	16720500	500	hyper	48	20	0	31	70.59	0	1.2754e-05	6	5	GSBRNA2T00005365001:promoter,GSBRNA2T00005364001:promoter
chrA04	16730500	16731000	500	hyper	52	23	13	53	69.33	19.7	0.0002355	9	9	GSBRNA2T00005361001:intron
chrA04	16855200	16857200	2000	hyper	541	168	19	271	76.3	6.55	3.8764e-34	46	33	GSBRNA2T00123408001:promoter
chrA04	16855200	16857200	2000	hyper	541	168	19	271	76.3	6.55	3.8764e-34	46	33	GSBRNA2T00123408001:promoter
chrA04	16865700	16866200	500	hyper	83	43	0	41	65.87	0	7.9304e-07	20	6	GSBRNA2T00123405001:exon
chrA04	16984600	16985100	500	hyper	41	19	0	37	68.33	0	3.7897e-06	6	5	GSBRNA2T00123375001:exon,GSBRNA2T00123375001:exon
chrA04	17105400	17105900	500	hyper	89	12	0	76	88.12	0	2.5852e-13	7	6	GSBRNA2T00123346001:promoter
chrA04	17105400	17105900	500	hyper	89	12	0	76	88.12	0	2.5852e-13	7	6	GSBRNA2T00123346001:promoter
chrA04	17330300	17331300	1000	hyper	109	11	71	105	90.83	40.34	2.2538e-05	13	12	GSBRNA2T00123299001:exon
chrA04	17366900	17367900	1000	hyper	118	215	0	355	35.44	0	1.7835e-25	21	18	GSBRNA2T00123291001:promoter
chrA04	17366900	17367900	1000	hyper	118	215	0	355	35.44	0	1.7835e-25	21	18	GSBRNA2T00123291001:promoter
chrA04	17572700	17573200	500	hyper	111	67	0	71	62.36	0	3.4067e-10	9	8	GSBRNA2T00123233001:promoter
chrA04	17572700	17573200	500	hyper	111	67	0	71	62.36	0	3.4067e-10	9	8	GSBRNA2T00123233001:promoter
chrA04	17860500	17861000	500	hyper	52	50	0	30	50.98	0	0.00017147	16	6	GSBRNA2T00088584001:promoter
chrA04	17860500	17861000	500	hyper	52	50	0	30	50.98	0	0.00017147	16	6	GSBRNA2T00088584001:promoter
chrA04	17876800	17877300	500	hyper	117	108	8	114	52	6.56	6.7758e-10	15	15	GSBRNA2T00088590001:promoter,GSBRNA2T00088591001:promoter
chrA04	17876800	17877300	500	hyper	117	108	8	114	52	6.56	6.7758e-10	15	15	GSBRNA2T00088590001:promoter,GSBRNA2T00088591001:promoter,GSBRNA2T00088590001:exon
chrA04	17990800	17991800	1000	hyper	818	101	14	127	89.01	9.93	5.846e-20	29	13	GSBRNA2T00088621001:promoter
chrA04	17990800	17991800	1000	hyper	818	101	14	127	89.01	9.93	5.846e-20	29	13	GSBRNA2T00088621001:promoter
chrA04	18102300	18102800	500	hyper	37	27	0	57	57.81	0	1.7727e-07	5	5	GSBRNA2T00045081001:exon,GSBRNA2T00045081001:exon,GSBRNA2T00045081001:exon
chrA04	18122200	18122700	500	hyper	93	8	7	54	92.08	11.48	3.8303e-08	5	5	GSBRNA2T00045088001:exon
chrA04	18125400	18125900	500	hyper	85	6	25	88	93.41	22.12	2.6416e-08	9	9	GSBRNA2T00045089001:exon
chrA04	18129800	18130300	500	hyper	81	19	0	96	81	0	6.594e-15	6	6	GSBRNA2T00045090001:exon
chrA04	18140900	18141400	500	hyper	44	10	5	86	81.48	5.49	2.0008e-10	5	9	GSBRNA2T00045093001:promoter
chrA04	18140900	18141400	500	hyper	44	10	5	86	81.48	5.49	2.0008e-10	5	9	GSBRNA2T00045093001:promoter,GSBRNA2T00045093001:exon
chrA04	18191400	18191900	500	hyper	41	74	0	76	35.65	0	8.4079e-07	14	8	GSBRNA2T00045106001:exon,GSBRNA2T00045106001:exon
chrA04	18196600	18197100	500	hyper	38	32	0	75	54.29	0	7.8796e-09	5	5	GSBRNA2T00045107001:promoter
chrA04	18196600	18197100	500	hyper	38	32	0	75	54.29	0	7.8796e-09	5	5	GSBRNA2T00045107001:promoter,GSBRNA2T00045107001:exon,GSBRNA2T00045107001:exon
chrA04	18319200	18319700	500	hyper	50	33	0	28	60.24	0	9.3288e-05	8	5	GSBRNA2T00045154001:promoter,GSBRNA2T00045155001:promoter
chrA04	18319200	18319700	500	hyper	50	33	0	28	60.24	0	9.3288e-05	8	5	GSBRNA2T00045154001:promoter,GSBRNA2T00045155001:promoter
chrA04	18762200	18762700	500	hyper	30	64	0	94	31.91	0	2.8174e-07	8	9	GSBRNA2T00063272001:promoter
chrA04	18762200	18762700	500	hyper	30	64	0	94	31.91	0	2.8174e-07	8	9	GSBRNA2T00063272001:promoter,GSBRNA2T00063272001:exon
chrA04	19002000	19002500	500	hyper	39	2	0	35	95.12	0	3.7512e-07	7	6	GSBRNA2T00088647001:exon,GSBRNA2T00088647001:exon
chrA04_random	24300	24800	500	hyper	17	20	0	44	45.95	0	4.244e-05	5	7	GSBRNA2T00053339001:intron
chrA04_random	134000	134500	500	hyper	162	9	48	46	94.74	51.06	0.0028588	15	11	GSBRNA2T00074797001:promoter,GSBRNA2T00074798001:promoter
chrA04_random	134000	134500	500	hyper	162	9	48	46	94.74	51.06	0.0028588	15	11	GSBRNA2T00074797001:promoter,GSBRNA2T00074798001:promoter
chrA04_random	186000	186500	500	hyper	96	16	38	65	85.71	36.89	0.00029504	7	7	GSBRNA2T00005328001:promoter
chrA04_random	186000	186500	500	hyper	96	16	38	65	85.71	36.89	0.00029504	7	7	GSBRNA2T00005328001:promoter
chrA04_random	231600	232100	500	hyper	36	53	0	66	40.45	0	1.3003e-06	8	8	GSBRNA2T00042567001:promoter
chrA04_random	231600	232100	500	hyper	36	53	0	66	40.45	0	1.3003e-06	8	8	GSBRNA2T00042567001:promoter
chrA04_random	582900	583900	1000	hyper	131	88	0	122	59.82	0	1.8629e-15	21	16	GSBRNA2T00074831001:exon
chrA04_random	710100	711600	1500	hyper	253	17	0	169	93.7	0	7.246e-30	20	15	GSBRNA2T00013616001:promoter,GSBRNA2T00013615001:promoter
chrA04_random	710100	711600	1500	hyper	253	17	0	169	93.7	0	7.246e-30	20	15	GSBRNA2T00013616001:promoter,GSBRNA2T00013615001:promoter,GSBRNA2T00013615001:exon
chrA04_random	820000	821000	1000	hyper	138	8	96	95	94.52	50.26	0.00023453	16	17	GSBRNA2T00065254001:promoter
chrA04_random	820000	821000	1000	hyper	138	8	96	95	94.52	50.26	0.00023453	16	17	GSBRNA2T00065254001:promoter
chrA04_random	871500	872000	500	hyper	17	42	0	29	28.81	0	0.0054011	9	5	GSBRNA2T00003271001:promoter
chrA04_random	871500	872000	500	hyper	17	42	0	29	28.81	0	0.0054011	9	5	GSBRNA2T00003271001:promoter,GSBRNA2T00003271001:exon
chrA04_random	977600	978100	500	hyper	160	10	1	40	94.12	2.44	1.3482e-08	6	5	GSBRNA2T00004849001:promoter
chrA04_random	977600	978100	500	hyper	160	10	1	40	94.12	2.44	1.3482e-08	6	5	GSBRNA2T00004849001:promoter
chrA04_random	1007800	1008300	500	hyper	68	49	0	56	58.12	0	8.5623e-08	14	9	GSBRNA2T00020543001:exon
chrA04_random	1091300	1091800	500	hyper	92	12	24	41	88.46	36.92	0.0014698	7	7	GSBRNA2T00072810001:promoter
chrA04_random	1091300	1091800	500	hyper	92	12	24	41	88.46	36.92	0.0014698	7	7	GSBRNA2T00072810001:promoter
chrA04_random	1114100	1114600	500	hyper	21	29	0	30	42	0	0.00081689	6	5	GSBRNA2T00068348001:promoter
chrA04_random	1114100	1114600	500	hyper	21	29	0	30	42	0	0.00081689	6	5	GSBRNA2T00068348001:promoter
chrA04_random	1165300	1166300	1000	hyper	113	57	3	109	66.47	2.68	1.1158e-13	14	15	GSBRNA2T00017487001:promoter,GSBRNA2T00017486001:promoter
chrA04_random	1165300	1166300	1000	hyper	113	57	3	109	66.47	2.68	1.1158e-13	14	15	GSBRNA2T00017487001:promoter,GSBRNA2T00017486001:promoter,GSBRNA2T00017487001:exon,GSBRNA2T00017487001:exon
chrA04_random	1228300	1228800	500	hyper	53	16	0	55	76.81	0	5.2191e-09	7	6	GSBRNA2T00016830001:promoter
chrA04_random	1228300	1228800	500	hyper	53	16	0	55	76.81	0	5.2191e-09	7	6	GSBRNA2T00016830001:promoter,GSBRNA2T00016829001:exon
chrA04_random	1287300	1287800	500	hyper	76	17	12	31	81.72	27.91	0.0022601	6	5	GSBRNA2T00008101001:promoter
chrA04_random	1287300	1287800	500	hyper	76	17	12	31	81.72	27.91	0.0022601	6	5	GSBRNA2T00008101001:promoter,GSBRNA2T00008099001:exon,GSBRNA2T00008099001:exon
chrA05	5900	6400	500	hyper	34	44	0	72	43.59	0	2.2431e-07	6	6	GSBRNA2T00133070001:promoter
chrA05	5900	6400	500	hyper	34	44	0	72	43.59	0	2.2431e-07	6	6	GSBRNA2T00133070001:promoter
chrA05	8000	8500	500	hyper	30	46	20	243	39.47	7.6	2.5235e-08	8	12	GSBRNA2T00133068001:exon,GSBRNA2T00133068001:exon,GSBRNA2T00133068001:exon,GSBRNA2T00133068001:exon
chrA05	508800	509300	500	hyper	344	43	109	83	88.89	56.77	0.0014162	10	10	GSBRNA2T00132958001:promoter,GSBRNA2T00132957001:promoter
chrA05	508800	509300	500	hyper	344	43	109	83	88.89	56.77	0.0014162	10	10	GSBRNA2T00132958001:promoter,GSBRNA2T00132957001:promoter
chrA05	531300	531800	500	hyper	139	12	0	54	92.05	0	4.3883e-11	10	10	GSBRNA2T00132950001:exon
chrA05	603000	603500	500	hyper	57	18	8	63	76	11.27	4.8222e-07	8	7	GSBRNA2T00132932001:promoter
chrA05	603000	603500	500	hyper	57	18	8	63	76	11.27	4.8222e-07	8	7	GSBRNA2T00132932001:promoter
chrA05	615100	615600	500	hyper	61	83	0	122	42.36	0	2.3833e-11	16	12	GSBRNA2T00132929001:exon,GSBRNA2T00132929001:exon
chrA05	818000	818500	500	hyper	34	13	0	28	72.34	0	3.5816e-05	6	5	GSBRNA2T00132895001:promoter
chrA05	818000	818500	500	hyper	34	13	0	28	72.34	0	3.5816e-05	6	5	GSBRNA2T00132895001:promoter
chrA05	1168700	1169200	500	hyper	114	16	26	76	87.69	25.49	5.8917e-07	7	7	GSBRNA2T00132809001:promoter
chrA05	1168700	1169200	500	hyper	114	16	26	76	87.69	25.49	5.8917e-07	7	7	GSBRNA2T00132809001:promoter
chrA05	1205900	1206400	500	hyper	63	7	10	24	90	29.41	0.0039995	11	6	GSBRNA2T00132800001:promoter
chrA05	1205900	1206400	500	hyper	63	7	10	24	90	29.41	0.0039995	11	6	GSBRNA2T00132800001:promoter,GSBRNA2T00132800001:exon
chrA05	1273300	1273800	500	hyper	22	55	3	58	28.57	4.92	0.0024147	6	6	GSBRNA2T00132783001:promoter
chrA05	1273300	1273800	500	hyper	22	55	3	58	28.57	4.92	0.0024147	6	6	GSBRNA2T00132783001:promoter
chrA05	1378200	1378700	500	hyper	46	130	2	75	26.14	2.6	0.00014926	12	10	GSBRNA2T00132760001:exon,GSBRNA2T00132760001:exon
chrA05	1406500	1407000	500	hyper	31	6	15	48	83.78	23.81	0.00062663	5	9	GSBRNA2T00132751001:exon,GSBRNA2T00132751001:exon
chrA05	1483400	1483900	500	hyper	20	28	2	35	41.67	5.41	0.0027773	7	7	GSBRNA2T00132725001:promoter
chrA05	1483400	1483900	500	hyper	20	28	2	35	41.67	5.41	0.0027773	7	7	GSBRNA2T00132725001:promoter,GSBRNA2T00132726001:exon
chrA05	1874100	1874600	500	hyper	114	20	0	41	85.07	0	2.4205e-08	17	7	GSBRNA2T00132657001:exon
chrA05	1885700	1886200	500	hyper	26	38	0	43	40.62	0	8.5135e-05	9	6	GSBRNA2T00132652001:promoter
chrA05	1885700	1886200	500	hyper	26	38	0	43	40.62	0	8.5135e-05	9	6	GSBRNA2T00132652001:promoter
chrA05	1909600	1910100	500	hyper	118	32	0	30	78.67	0	2.9204e-06	13	5	GSBRNA2T00132643001:exon
chrA05	1912100	1912600	500	hyper	88	33	0	35	72.73	0	1.5785e-06	15	6	GSBRNA2T00132642001:exon,GSBRNA2T00132642001:exon,GSBRNA2T00132642001:exon,GSBRNA2T00132642001:exon
chrA05	1912700	1913200	500	hyper	35	35	1	52	50	1.89	7.0552e-06	5	5	GSBRNA2T00132642001:intron
chrA05	2067400	2067900	500	hyper	62	14	1	27	81.58	3.57	2.7982e-05	9	5	GSBRNA2T00132592001:exon
chrA05	2176900	2177900	1000	hyper	86	48	0	76	64.18	0	9.7265e-11	17	11	GSBRNA2T00116608001:promoter
chrA05	2176900	2177900	1000	hyper	86	48	0	76	64.18	0	9.7265e-11	17	11	GSBRNA2T00116608001:promoter,GSBRNA2T00116607001:exon,GSBRNA2T00116607001:exon,GSBRNA2T00116607001:exon,GSBRNA2T00116607001:exon
chrA05	2183800	2184300	500	hyper	30	2	4	59	93.75	6.35	4.6699e-08	5	6	GSBRNA2T00116608001:intron
chrA05	2259100	2259600	500	hyper	77	8	0	84	90.59	0	2.4698e-14	9	10	GSBRNA2T00116621001:promoter,GSBRNA2T00116620001:promoter
chrA05	2259100	2259600	500	hyper	77	8	0	84	90.59	0	2.4698e-14	9	10	GSBRNA2T00116621001:promoter,GSBRNA2T00116620001:promoter
chrA05	2465300	2465800	500	hyper	44	89	0	39	33.08	0	0.00048434	9	5	GSBRNA2T00116679001:promoter,GSBRNA2T00116678001:promoter
chrA05	2465300	2465800	500	hyper	44	89	0	39	33.08	0	0.00048434	9	5	GSBRNA2T00116679001:promoter,GSBRNA2T00116678001:promoter
chrA05	2477600	2478100	500	hyper	39	34	0	77	53.42	0	6.1591e-09	6	6	GSBRNA2T00116684001:promoter
chrA05	2477600	2478100	500	hyper	39	34	0	77	53.42	0	6.1591e-09	6	6	GSBRNA2T00116684001:promoter,GSBRNA2T00116683001:exon,GSBRNA2T00116683001:exon
chrA05	2511800	2512300	500	hyper	93	37	18	41	71.54	30.51	0.0040803	7	5	GSBRNA2T00116695001:promoter
chrA05	2511800	2512300	500	hyper	93	37	18	41	71.54	30.51	0.0040803	7	5	GSBRNA2T00116695001:promoter
chrA05	2574000	2574500	500	hyper	25	30	0	39	45.45	0	8.567e-05	8	6	GSBRNA2T00116710001:exon,GSBRNA2T00116710001:exon
chrA05	2706100	2706600	500	hyper	19	19	0	30	50	0	0.00034771	5	5	GSBRNA2T00116743001:exon
chrA05	2754500	2755000	500	hyper	34	1	51	81	97.14	38.64	0.0013506	6	8	GSBRNA2T00116758001:promoter,GSBRNA2T00116759001:promoter
chrA05	2754500	2755000	500	hyper	34	1	51	81	97.14	38.64	0.0013506	6	8	GSBRNA2T00116758001:promoter,GSBRNA2T00116759001:promoter
chrA05	2789800	2790300	500	hyper	29	48	0	43	37.66	0	0.00013241	7	6	GSBRNA2T00116768001:promoter
chrA05	2789800	2790300	500	hyper	29	48	0	43	37.66	0	0.00013241	7	6	GSBRNA2T00116768001:promoter
chrA05	2818600	2819100	500	hyper	24	22	0	47	52.17	0	6.7148e-06	5	6	GSBRNA2T00116774001:promoter,GSBRNA2T00116773001:promoter
chrA05	2818600	2819100	500	hyper	24	22	0	47	52.17	0	6.7148e-06	5	6	GSBRNA2T00116774001:promoter,GSBRNA2T00116773001:promoter
chrA05	2896700	2897200	500	hyper	50	29	0	80	63.29	0	1.7224e-10	7	5	GSBRNA2T00116780001:exon,GSBRNA2T00116780001:exon,GSBRNA2T00116780001:exon
chrA05	2906200	2906700	500	hyper	79	49	9	82	61.72	9.89	1.1842e-07	7	7	GSBRNA2T00116783001:intron
chrA05	3281700	3283000	1300	hyper	183	25	7	147	87.98	4.55	1.3917e-21	17	15	GSBRNA2T00116861001:promoter
chrA05	3281700	3283000	1300	hyper	183	25	7	147	87.98	4.55	1.3917e-21	17	15	GSBRNA2T00116861001:promoter,GSBRNA2T00116861001:exon,GSBRNA2T00116861001:exon,GSBRNA2T00116861001:exon,GSBRNA2T00116862001:exon
chrA05	3306300	3306800	500	hyper	50	26	0	38	65.79	0	3.1994e-06	6	5	GSBRNA2T00116865001:intron
chrA05	3625400	3625900	500	hyper	257	68	0	49	79.08	0	1.522e-09	23	6	GSBRNA2T00116920001:promoter
chrA05	3625400	3625900	500	hyper	257	68	0	49	79.08	0	1.522e-09	23	6	GSBRNA2T00116920001:promoter
chrA05	3675200	3675700	500	hyper	62	35	0	39	63.92	0	2.5342e-06	8	5	GSBRNA2T00116936001:promoter
chrA05	3675200	3675700	500	hyper	62	35	0	39	63.92	0	2.5342e-06	8	5	GSBRNA2T00116936001:promoter
chrA05	3790600	3791100	500	hyper	67	35	0	58	65.69	0	1.1189e-08	14	9	GSBRNA2T00116962001:promoter
chrA05	3790600	3791100	500	hyper	67	35	0	58	65.69	0	1.1189e-08	14	9	GSBRNA2T00116962001:promoter,GSBRNA2T00116961001:exon,GSBRNA2T00116961001:exon,GSBRNA2T00116961001:exon
chrA05	3935500	3936500	1000	hyper	258	18	58	79	93.48	42.34	7.5038e-06	16	12	GSBRNA2T00117001001:exon
chrA05	3942400	3943400	1000	hyper	435	35	0	265	92.55	0	5.2152e-46	30	18	GSBRNA2T00117003001:promoter,GSBRNA2T00117004001:promoter
chrA05	3942400	3943400	1000	hyper	435	35	0	265	92.55	0	5.2152e-46	30	18	GSBRNA2T00117003001:promoter,GSBRNA2T00117004001:promoter
chrA05	3992500	3993000	500	hyper	22	60	1	113	26.83	0.88	1.0115e-06	9	12	GSBRNA2T00117014001:promoter
chrA05	3992500	3993000	500	hyper	22	60	1	113	26.83	0.88	1.0115e-06	9	12	GSBRNA2T00117014001:promoter
chrA05	4093500	4094000	500	hyper	17	35	0	65	32.69	0	1.8465e-05	8	10	GSBRNA2T00117033001:promoter
chrA05	4093500	4094000	500	hyper	17	35	0	65	32.69	0	1.8465e-05	8	10	GSBRNA2T00117033001:promoter
chrA05	4593500	4594500	1000	hyper	167	20	9	131	89.3	6.43	1.0283e-18	15	15	GSBRNA2T00117126001:promoter
chrA05	4593500	4594500	1000	hyper	167	20	9	131	89.3	6.43	1.0283e-18	15	15	GSBRNA2T00117126001:promoter
chrA05	4803400	4803900	500	hyper	50	14	0	40	78.12	0	3.4526e-07	9	6	GSBRNA2T00050294001:promoter
chrA05	4803400	4803900	500	hyper	50	14	0	40	78.12	0	3.4526e-07	9	6	GSBRNA2T00050294001:promoter,GSBRNA2T00050295001:exon
chrA05	4870600	4871100	500	hyper	49	45	1	50	52.13	1.96	4.7856e-06	11	7	GSBRNA2T00050274001:exon,GSBRNA2T00050274001:exon
chrA05	4948300	4948800	500	hyper	72	50	0	97	59.02	0	4.635e-12	5	6	GSBRNA2T00050254001:promoter
chrA05	4948300	4948800	500	hyper	72	50	0	97	59.02	0	4.635e-12	5	6	GSBRNA2T00050254001:promoter
chrA05	5334800	5335300	500	hyper	29	45	0	39	39.19	0	0.00020349	7	5	GSBRNA2T00095290001:promoter
chrA05	5334800	5335300	500	hyper	29	45	0	39	39.19	0	0.00020349	7	5	GSBRNA2T00095290001:promoter
chrA05	5393400	5393900	500	hyper	35	38	0	112	47.95	0	5.036e-11	8	14	GSBRNA2T00095277001:promoter
chrA05	5393400	5393900	500	hyper	35	38	0	112	47.95	0	5.036e-11	8	14	GSBRNA2T00095277001:promoter,GSBRNA2T00095277001:exon
chrA05	5417500	5418000	500	hyper	83	86	18	103	49.11	14.88	1.5465e-05	13	9	GSBRNA2T00095272001:promoter
chrA05	5417500	5418000	500	hyper	83	86	18	103	49.11	14.88	1.5465e-05	13	9	GSBRNA2T00095272001:promoter
chrA05	5542700	5543200	500	hyper	26	4	18	47	86.67	27.69	0.0020981	5	8	GSBRNA2T00095236001:promoter
chrA05	5542700	5543200	500	hyper	26	4	18	47	86.67	27.69	0.0020981	5	8	GSBRNA2T00095236001:promoter,GSBRNA2T00095236001:exon
chrA05	5689400	5689900	500	hyper	53	34	0	47	60.92	0	6.2605e-07	9	5	GSBRNA2T00095207001:promoter
chrA05	5689400	5689900	500	hyper	53	34	0	47	60.92	0	6.2605e-07	9	5	GSBRNA2T00095207001:promoter,GSBRNA2T00095207001:exon
chrA05	5725800	5726300	500	hyper	33	27	5	51	55	8.93	0.00012227	8	7	GSBRNA2T00095201001:promoter
chrA05	5725800	5726300	500	hyper	33	27	5	51	55	8.93	0.00012227	8	7	GSBRNA2T00095201001:promoter
chrA05	6128100	6128600	500	hyper	36	38	0	29	48.65	0	0.00034512	11	5	GSBRNA2T00074129001:exon
chrA05	6248100	6250100	2000	hyper	250	302	0	237	45.29	0	5.9988e-23	53	31	GSBRNA2T00074107001:promoter,GSBRNA2T00074106001:promoter
chrA05	6248100	6250100	2000	hyper	250	302	0	237	45.29	0	5.9988e-23	53	31	GSBRNA2T00074107001:promoter,GSBRNA2T00074106001:promoter,GSBRNA2T00074107001:exon,GSBRNA2T00074107001:exon,GSBRNA2T00074107001:exon
chrA05	6255500	6256000	500	hyper	101	21	67	142	82.79	32.06	7.8515e-07	9	19	GSBRNA2T00074105001:promoter
chrA05	6255500	6256000	500	hyper	101	21	67	142	82.79	32.06	7.8515e-07	9	19	GSBRNA2T00074105001:promoter
chrA05	6340700	6341200	500	hyper	85	95	0	35	47.22	0	7.562e-05	11	5	GSBRNA2T00048649001:promoter
chrA05	6340700	6341200	500	hyper	85	95	0	35	47.22	0	7.562e-05	11	5	GSBRNA2T00048649001:promoter
chrA05	6464600	6465600	1000	hyper	219	98	6	166	69.09	3.49	1.0804e-20	12	12	GSBRNA2T00048620001:promoter
chrA05	6464600	6465600	1000	hyper	219	98	6	166	69.09	3.49	1.0804e-20	12	12	GSBRNA2T00048620001:promoter
chrA05	6654600	6655100	500	hyper	41	37	15	88	52.56	14.56	8.1614e-05	8	14	GSBRNA2T00048579001:promoter
chrA05	6654600	6655100	500	hyper	41	37	15	88	52.56	14.56	8.1614e-05	8	14	GSBRNA2T00048579001:promoter,GSBRNA2T00048579001:exon
chrA05	6958200	6959500	1300	hyper	632	62	4	167	91.07	2.34	3.4154e-30	25	15	GSBRNA2T00048523001:promoter,GSBRNA2T00048524001:promoter
chrA05	6958200	6959500	1300	hyper	632	62	4	167	91.07	2.34	3.4154e-30	25	15	GSBRNA2T00048523001:promoter,GSBRNA2T00048524001:promoter,GSBRNA2T00048524001:exon,GSBRNA2T00048524001:exon,GSBRNA2T00048524001:exon,GSBRNA2T00048524001:exon,GSBRNA2T00048525001:exon
chrA05	7056800	7057300	500	hyper	42	42	0	68	50	0	7.5048e-08	5	5	GSBRNA2T00048507001:promoter
chrA05	7056800	7057300	500	hyper	42	42	0	68	50	0	7.5048e-08	5	5	GSBRNA2T00048507001:promoter
chrA05	7077800	7078800	1000	hyper	115	32	8	59	78.23	11.94	1.3633e-07	15	11	GSBRNA2T00048502001:promoter
chrA05	7077800	7078800	1000	hyper	115	32	8	59	78.23	11.94	1.3633e-07	15	11	GSBRNA2T00048502001:promoter
chrA05	7093600	7094600	1000	hyper	101	78	0	67	56.42	0	5.2609e-09	18	11	GSBRNA2T00048497001:exon,GSBRNA2T00048496001:exon
chrA05	7115700	7117000	1300	hyper	228	22	59	87	91.2	40.41	4.4143e-06	16	16	GSBRNA2T00048494001:promoter
chrA05	7115700	7117000	1300	hyper	228	22	59	87	91.2	40.41	4.4143e-06	16	16	GSBRNA2T00048494001:promoter
chrA05	7206500	7207000	500	hyper	26	42	1	80	38.24	1.23	1.2021e-06	6	6	GSBRNA2T00082082001:promoter,GSBRNA2T00082081001:promoter
chrA05	7206500	7207000	500	hyper	26	42	1	80	38.24	1.23	1.2021e-06	6	6	GSBRNA2T00082082001:promoter,GSBRNA2T00082081001:promoter
chrA05	7214800	7215300	500	hyper	29	54	0	32	34.94	0	0.0012772	10	6	GSBRNA2T00082078001:promoter,GSBRNA2T00082079001:promoter
chrA05	7214800	7215300	500	hyper	29	54	0	32	34.94	0	0.0012772	10	6	GSBRNA2T00082078001:promoter,GSBRNA2T00082079001:promoter,GSBRNA2T00082077001:exon,GSBRNA2T00082077001:exon,GSBRNA2T00082078001:exon
chrA05	7446600	7449800	3200	hyper	123	131	0	267	48.43	0	3.1634e-25	28	28	GSBRNA2T00066216001:promoter
chrA05	7446600	7449800	3200	hyper	123	131	0	267	48.43	0	3.1634e-25	28	28	GSBRNA2T00066216001:promoter,GSBRNA2T00066216001:exon,GSBRNA2T00066216001:exon
chrA05	7478900	7482500	3600	hyper	244	219	1	328	52.7	0.3	1.3546e-33	40	26	GSBRNA2T00066221001:promoter
chrA05	7478900	7482500	3600	hyper	244	219	1	328	52.7	0.3	1.3546e-33	40	26	GSBRNA2T00066221001:promoter,GSBRNA2T00066221001:exon,GSBRNA2T00066221001:exon
chrA05	7519800	7520300	500	hyper	32	101	0	42	24.06	0	0.0019091	15	7	GSBRNA2T00066226001:intron
chrA05	7610600	7611100	500	hyper	18	15	0	34	54.55	0	9.5488e-05	5	6	GSBRNA2T00066235001:exon,GSBRNA2T00066235001:exon
chrA05	7662400	7662900	500	hyper	27	18	2	54	60	3.57	3.5544e-06	5	7	GSBRNA2T00066243001:promoter
chrA05	7662400	7662900	500	hyper	27	18	2	54	60	3.57	3.5544e-06	5	7	GSBRNA2T00066243001:promoter,GSBRNA2T00066242001:exon,GSBRNA2T00066242001:exon
chrA05	7681500	7682600	1100	hyper	54	71	0	126	43.2	0	1.0738e-11	13	15	GSBRNA2T00066247001:exon
chrA05	7870500	7871600	1100	hyper	65	113	0	124	36.52	0	2.1695e-10	15	11	GSBRNA2T00125649001:exon
chrA05	7908100	7908600	500	hyper	59	2	48	51	96.72	48.48	0.0061623	6	6	GSBRNA2T00125643001:promoter
chrA05	7908100	7908600	500	hyper	59	2	48	51	96.72	48.48	0.0061623	6	6	GSBRNA2T00125643001:promoter
chrA05	8135700	8136200	500	hyper	96	5	21	31	95.05	40.38	0.0032796	5	5	GSBRNA2T00125610001:promoter
chrA05	8135700	8136200	500	hyper	96	5	21	31	95.05	40.38	0.0032796	5	5	GSBRNA2T00125610001:promoter
chrA05	8237800	8238300	500	hyper	73	40	0	66	64.6	0	1.5526e-09	8	7	GSBRNA2T00125592001:promoter
chrA05	8237800	8238300	500	hyper	73	40	0	66	64.6	0	1.5526e-09	8	7	GSBRNA2T00125592001:promoter
chrA05	8238900	8239400	500	hyper	16	27	0	32	37.21	0	0.001175	5	5	GSBRNA2T00125592001:promoter
chrA05	8238900	8239400	500	hyper	16	27	0	32	37.21	0	0.001175	5	5	GSBRNA2T00125592001:promoter
chrA05	8269600	8270100	500	hyper	211	6	43	49	97.24	46.74	0.00038231	14	10	GSBRNA2T00125585001:promoter
chrA05	8269600	8270100	500	hyper	211	6	43	49	97.24	46.74	0.00038231	14	10	GSBRNA2T00125585001:promoter,GSBRNA2T00125585001:exon
chrA05	8491400	8491900	500	hyper	175	89	0	30	66.29	0	1.2552e-05	18	5	GSBRNA2T00125546001:promoter
chrA05	8491400	8491900	500	hyper	175	89	0	30	66.29	0	1.2552e-05	18	5	GSBRNA2T00125546001:promoter,GSBRNA2T00125544001:exon
chrA05	8675500	8676000	500	hyper	71	54	4	108	56.8	3.57	5.8433e-11	11	8	GSBRNA2T00125511001:promoter
chrA05	8675500	8676000	500	hyper	71	54	4	108	56.8	3.57	5.8433e-11	11	8	GSBRNA2T00125511001:promoter
chrA05	8845600	8846600	1000	hyper	139	18	48	58	88.54	45.28	0.0012603	17	15	GSBRNA2T00033277001:promoter
chrA05	8845600	8846600	1000	hyper	139	18	48	58	88.54	45.28	0.0012603	17	15	GSBRNA2T00033277001:promoter,GSBRNA2T00033278001:exon,GSBRNA2T00033278001:exon,GSBRNA2T00033278001:exon,GSBRNA2T00033278001:exon,GSBRNA2T00033278001:exon,GSBRNA2T00033278001:exon,GSBRNA2T00033278001:exon,GSBRNA2T00033278001:exon
chrA05	8846600	8847600	1000	hyper	146	11	30	97	92.99	23.62	1.1734e-09	16	15	GSBRNA2T00033277001:promoter
chrA05	8846600	8847600	1000	hyper	146	11	30	97	92.99	23.62	1.1734e-09	16	15	GSBRNA2T00033277001:promoter,GSBRNA2T00033278001:exon,GSBRNA2T00033278001:exon,GSBRNA2T00033278001:exon,GSBRNA2T00033278001:exon,GSBRNA2T00033278001:exon
chrA05	8852500	8853000	500	hyper	35	38	4	39	47.95	9.3	0.0016249	7	6	GSBRNA2T00033280001:exon
chrA05	9164700	9165200	500	hyper	40	32	0	27	55.56	0	0.00023366	10	5	GSBRNA2T00033329001:exon
chrA05	9314000	9315500	1500	hyper	288	101	0	166	74.04	0	3.9001e-25	32	21	GSBRNA2T00094067001:promoter
chrA05	9314000	9315500	1500	hyper	288	101	0	166	74.04	0	3.9001e-25	32	21	GSBRNA2T00094067001:promoter
chrA05	9317700	9318200	500	hyper	51	53	9	91	49.04	9	2.5409e-06	9	10	GSBRNA2T00094066001:exon,GSBRNA2T00094067001:exon,GSBRNA2T00094067001:exon
chrA05	9371500	9372000	500	hyper	27	39	0	43	40.91	0	7.9246e-05	8	5	GSBRNA2T00094056001:promoter
chrA05	9371500	9372000	500	hyper	27	39	0	43	40.91	0	7.9246e-05	8	5	GSBRNA2T00094056001:promoter,GSBRNA2T00094056001:exon
chrA05	9372400	9372900	500	hyper	81	10	28	40	89.01	41.18	0.0041768	9	7	GSBRNA2T00094056001:exon
chrA05	9374100	9375100	1000	hyper	425	40	221	113	91.4	66.17	0.0031777	34	28	GSBRNA2T00094056001:exon,GSBRNA2T00094056001:exon,GSBRNA2T00094056001:exon
chrA05	9375100	9375600	500	hyper	72	9	0	85	88.89	0	3.6488e-14	6	6	GSBRNA2T00094056001:exon
chrA05	10173800	10174300	500	hyper	149	27	12	51	84.66	19.05	2.0248e-06	19	6	GSBRNA2T00043344001:promoter
chrA05	10173800	10174300	500	hyper	149	27	12	51	84.66	19.05	2.0248e-06	19	6	GSBRNA2T00043344001:promoter
chrA05	10456600	10457100	500	hyper	48	32	0	70	60	0	3.9464e-09	5	6	GSBRNA2T00042881001:promoter
chrA05	10456600	10457100	500	hyper	48	32	0	70	60	0	3.9464e-09	5	6	GSBRNA2T00042881001:promoter,GSBRNA2T00042881001:exon
chrA05	10560700	10561200	500	hyper	25	82	0	66	23.36	0	0.00015534	9	7	GSBRNA2T00042895001:exon,GSBRNA2T00042895001:exon
chrA05	10569900	10570400	500	hyper	44	21	0	34	67.69	0	8.488e-06	8	6	GSBRNA2T00042895001:exon,GSBRNA2T00042895001:exon,GSBRNA2T00042895001:exon
chrA05	10583800	10584300	500	hyper	41	2	0	213	95.35	0	4.6402e-28	6	17	GSBRNA2T00042896001:promoter
chrA05	10583800	10584300	500	hyper	41	2	0	213	95.35	0	4.6402e-28	6	17	GSBRNA2T00042896001:promoter
chrA05	10799700	10800200	500	hyper	62	65	0	66	48.82	0	8.8708e-08	12	5	GSBRNA2T00042923001:intron
chrA05	10802800	10803300	500	hyper	100	23	0	52	81.3	0	1.4185e-09	9	7	GSBRNA2T00042923001:promoter
chrA05	10802800	10803300	500	hyper	100	23	0	52	81.3	0	1.4185e-09	9	7	GSBRNA2T00042923001:promoter,GSBRNA2T00042924001:exon,GSBRNA2T00042924001:exon,GSBRNA2T00042924001:exon,GSBRNA2T00042924001:exon,GSBRNA2T00042924001:exon
chrA05	10865400	10865900	500	hyper	79	9	1	60	89.77	1.64	1.161e-10	5	5	GSBRNA2T00042935001:promoter
chrA05	10865400	10865900	500	hyper	79	9	1	60	89.77	1.64	1.161e-10	5	5	GSBRNA2T00042935001:promoter
chrA05	10911800	10912300	500	hyper	22	48	7	77	31.43	8.33	0.0026614	7	9	GSBRNA2T00058624001:intron
chrA05	11035800	11036800	1000	hyper	194	101	12	279	65.76	4.12	8.5116e-29	21	21	GSBRNA2T00058612001:promoter
chrA05	11035800	11036800	1000	hyper	194	101	12	279	65.76	4.12	8.5116e-29	21	21	GSBRNA2T00058612001:promoter
chrA05	11041600	11042100	500	hyper	37	64	0	171	36.63	0	5.3163e-13	11	8	GSBRNA2T00058612001:exon
chrA05	11065800	11066300	500	hyper	46	29	0	31	61.33	0	3.9414e-05	6	5	GSBRNA2T00058611001:promoter
chrA05	11065800	11066300	500	hyper	46	29	0	31	61.33	0	3.9414e-05	6	5	GSBRNA2T00058611001:promoter
chrA05	11079900	11080400	500	hyper	67	104	1	84	39.18	1.18	1.3821e-07	18	8	GSBRNA2T00058608001:promoter
chrA05	11079900	11080400	500	hyper	67	104	1	84	39.18	1.18	1.3821e-07	18	8	GSBRNA2T00058608001:promoter,GSBRNA2T00058608001:exon
chrA05	11087300	11087800	500	hyper	36	4	0	25	90	0	1.7898e-05	5	5	GSBRNA2T00058606001:promoter
chrA05	11087300	11087800	500	hyper	36	4	0	25	90	0	1.7898e-05	5	5	GSBRNA2T00058606001:promoter,GSBRNA2T00058606001:exon
chrA05	11480600	11481100	500	hyper	24	61	0	34	28.24	0	0.0027056	9	6	GSBRNA2T00048459001:exon
chrA05	11736200	11736700	500	hyper	56	9	2	66	86.15	2.94	3.2055e-10	5	6	GSBRNA2T00048429001:promoter
chrA05	11736200	11736700	500	hyper	56	9	2	66	86.15	2.94	3.2055e-10	5	6	GSBRNA2T00048429001:promoter
chrA05	11928900	11929400	500	hyper	67	7	0	38	90.54	0	7.7862e-08	8	5	GSBRNA2T00048385001:promoter
chrA05	11928900	11929400	500	hyper	67	7	0	38	90.54	0	7.7862e-08	8	5	GSBRNA2T00048385001:promoter
chrA05	12141400	12141900	500	hyper	48	74	0	46	39.34	0	4.38e-05	12	7	GSBRNA2T00048356001:promoter
chrA05	12141400	12141900	500	hyper	48	74	0	46	39.34	0	4.38e-05	12	7	GSBRNA2T00048356001:promoter,GSBRNA2T00048357001:exon,GSBRNA2T00048357001:exon
chrA05	12380100	12380600	500	hyper	50	15	0	33	76.92	0	3.2413e-06	6	5	GSBRNA2T00023940001:exon,GSBRNA2T00023940001:exon,GSBRNA2T00023940001:exon
chrA05	12714800	12715300	500	hyper	63	25	0	34	71.59	0	3.5186e-06	9	5	GSBRNA2T00023891001:promoter
chrA05	12714800	12715300	500	hyper	63	25	0	34	71.59	0	3.5186e-06	9	5	GSBRNA2T00023891001:promoter
chrA05	13012200	13012700	500	hyper	23	23	0	57	50	0	1.4279e-06	5	5	GSBRNA2T00036640001:promoter
chrA05	13012200	13012700	500	hyper	23	23	0	57	50	0	1.4279e-06	5	5	GSBRNA2T00036640001:promoter,GSBRNA2T00036640001:exon
chrA05	13032600	13033100	500	hyper	127	21	49	120	85.81	28.99	4.8721e-08	9	18	GSBRNA2T00036636001:exon
chrA05	13157100	13157600	500	hyper	70	4	0	30	94.59	0	7.8308e-07	7	5	GSBRNA2T00036629001:promoter
chrA05	13157100	13157600	500	hyper	70	4	0	30	94.59	0	7.8308e-07	7	5	GSBRNA2T00036629001:promoter,GSBRNA2T00036629001:exon
chrA05	13377000	13377500	500	hyper	59	25	4	31	70.24	11.43	0.00030936	7	5	GSBRNA2T00036600001:exon,GSBRNA2T00036600001:exon
chrA05	13725100	13725600	500	hyper	43	10	0	30	81.13	0	6.2859e-06	7	5	GSBRNA2T00040233001:promoter
chrA05	13725100	13725600	500	hyper	43	10	0	30	81.13	0	6.2859e-06	7	5	GSBRNA2T00040233001:promoter,GSBRNA2T00040233001:exon
chrA05	13937800	13938300	500	hyper	59	33	0	30	64.13	0	3.0432e-05	7	5	GSBRNA2T00077370001:exon,GSBRNA2T00077370001:exon,GSBRNA2T00077370001:exon
chrA05	14231200	14231700	500	hyper	38	52	0	59	42.22	0	2.7512e-06	6	6	GSBRNA2T00029534001:promoter
chrA05	14231200	14231700	500	hyper	38	52	0	59	42.22	0	2.7512e-06	6	6	GSBRNA2T00029534001:promoter,GSBRNA2T00029534001:exon,GSBRNA2T00029534001:exon
chrA05	14306000	14306500	500	hyper	41	114	0	33	26.45	0	0.0037347	11	5	GSBRNA2T00029521001:promoter
chrA05	14306000	14306500	500	hyper	41	114	0	33	26.45	0	0.0037347	11	5	GSBRNA2T00029521001:promoter,GSBRNA2T00029521001:exon
chrA05	14312800	14313300	500	hyper	36	23	7	40	61.02	14.89	0.0012439	6	5	GSBRNA2T00029520001:intron
chrA05	14371800	14372300	500	hyper	40	91	1	53	30.53	1.85	0.00030451	13	6	GSBRNA2T00029512001:exon
chrA05	14372700	14373200	500	hyper	28	6	1	40	82.35	2.44	1.8091e-06	5	5	GSBRNA2T00029512001:promoter
chrA05	14372700	14373200	500	hyper	28	6	1	40	82.35	2.44	1.8091e-06	5	5	GSBRNA2T00029512001:promoter,GSBRNA2T00029512001:exon
chrA05	14389000	14389500	500	hyper	34	8	0	74	80.95	0	6.0368e-11	5	9	GSBRNA2T00029511001:exon
chrA05	14432000	14432500	500	hyper	46	2	0	68	95.83	0	9.2914e-12	5	7	GSBRNA2T00029499001:promoter
chrA05	14432000	14432500	500	hyper	46	2	0	68	95.83	0	9.2914e-12	5	7	GSBRNA2T00029499001:promoter
chrA05	14486400	14486900	500	hyper	57	41	0	176	58.16	0	9.3744e-19	6	8	GSBRNA2T00029488001:promoter
chrA05	14486400	14486900	500	hyper	57	41	0	176	58.16	0	9.3744e-19	6	8	GSBRNA2T00029488001:promoter
chrA05	14495400	14496400	1000	hyper	87	5	10	298	94.57	3.25	1.2348e-34	15	22	GSBRNA2T00029486001:promoter
chrA05	14495400	14496400	1000	hyper	87	5	10	298	94.57	3.25	1.2348e-34	15	22	GSBRNA2T00029486001:promoter
chrA05	14832900	14833400	500	hyper	25	10	0	29	71.43	0	4.1459e-05	5	5	GSBRNA2T00066347001:exon
chrA05	14866700	14867200	500	hyper	60	51	1	76	54.05	1.3	8.7699e-09	14	11	GSBRNA2T00066342001:exon
chrA05	14869200	14869700	500	hyper	19	52	0	77	26.76	0	1.8455e-05	10	7	GSBRNA2T00066341001:promoter,GSBRNA2T00066340001:promoter,GSBRNA2T00066342001:promoter
chrA05	14869200	14869700	500	hyper	19	52	0	77	26.76	0	1.8455e-05	10	7	GSBRNA2T00066341001:promoter,GSBRNA2T00066340001:promoter,GSBRNA2T00066342001:promoter
chrA05	14876500	14877500	1000	hyper	412	45	4	114	90.15	3.39	2.2633e-20	23	19	GSBRNA2T00066338001:promoter
chrA05	14876500	14877500	1000	hyper	412	45	4	114	90.15	3.39	2.2633e-20	23	19	GSBRNA2T00066338001:promoter,GSBRNA2T00066338001:exon
chrA05	14961000	14961500	500	hyper	119	24	24	67	83.22	26.37	6.0897e-06	9	8	GSBRNA2T00066327001:exon,GSBRNA2T00066327001:exon,GSBRNA2T00066327001:exon
chrA05	15026300	15026800	500	hyper	29	37	0	89	43.94	0	1.3545e-08	6	10	GSBRNA2T00066320001:promoter
chrA05	15026300	15026800	500	hyper	29	37	0	89	43.94	0	1.3545e-08	6	10	GSBRNA2T00066320001:promoter
chrA05	15086000	15086500	500	hyper	46	64	0	47	41.82	0	2.3044e-05	11	5	GSBRNA2T00066305001:promoter,GSBRNA2T00066306001:promoter
chrA05	15086000	15086500	500	hyper	46	64	0	47	41.82	0	2.3044e-05	11	5	GSBRNA2T00066305001:promoter,GSBRNA2T00066306001:promoter
chrA05	15522700	15523700	1000	hyper	285	42	0	114	87.16	0	8.8787e-21	22	15	GSBRNA2T00009264001:promoter
chrA05	15522700	15523700	1000	hyper	285	42	0	114	87.16	0	8.8787e-21	22	15	GSBRNA2T00009264001:promoter
chrA05	15588200	15588700	500	hyper	35	12	0	38	74.47	0	1.7082e-06	8	5	GSBRNA2T00009273001:promoter
chrA05	15588200	15588700	500	hyper	35	12	0	38	74.47	0	1.7082e-06	8	5	GSBRNA2T00009273001:promoter
chrA05	15604600	15605100	500	hyper	121	8	0	97	93.8	0	2.0624e-17	7	5	GSBRNA2T00009275001:promoter
chrA05	15604600	15605100	500	hyper	121	8	0	97	93.8	0	2.0624e-17	7	5	GSBRNA2T00009275001:promoter
chrA05	15700700	15701200	500	hyper	21	12	1	35	63.64	2.78	7.4863e-05	6	6	GSBRNA2T00009290001:promoter
chrA05	15700700	15701200	500	hyper	21	12	1	35	63.64	2.78	7.4863e-05	6	6	GSBRNA2T00009290001:promoter
chrA05	15733600	15734600	1000	hyper	253	75	5	118	77.13	4.07	3.2254e-17	17	13	GSBRNA2T00009294001:exon,GSBRNA2T00009294001:exon
chrA05	16028100	16028600	500	hyper	27	11	5	57	71.05	8.06	4.9424e-06	6	7	GSBRNA2T00091728001:promoter
chrA05	16028100	16028600	500	hyper	27	11	5	57	71.05	8.06	4.9424e-06	6	7	GSBRNA2T00091728001:promoter
chrA05	16244800	16245800	1000	hyper	109	11	43	80	90.83	34.96	1.2188e-05	11	11	GSBRNA2T00154041001:exon
chrA05	16255400	16255900	500	hyper	40	14	1	54	74.07	1.82	5.9962e-08	5	6	GSBRNA2T00154040001:promoter
chrA05	16255400	16255900	500	hyper	40	14	1	54	74.07	1.82	5.9962e-08	5	6	GSBRNA2T00154040001:promoter
chrA05	16296300	16296800	500	hyper	122	19	0	116	86.52	0	5.1924e-19	5	5	GSBRNA2T00154033001:promoter
chrA05	16296300	16296800	500	hyper	122	19	0	116	86.52	0	5.1924e-19	5	5	GSBRNA2T00154033001:promoter
chrA05	16334400	16334900	500	hyper	112	87	0	47	56.28	0	6.9382e-07	17	9	GSBRNA2T00154024001:promoter
chrA05	16334400	16334900	500	hyper	112	87	0	47	56.28	0	6.9382e-07	17	9	GSBRNA2T00154024001:promoter,GSBRNA2T00154024001:exon
chrA05	16573400	16573900	500	hyper	100	21	5	58	82.64	7.94	1.3326e-08	8	9	GSBRNA2T00153974001:promoter
chrA05	16573400	16573900	500	hyper	100	21	5	58	82.64	7.94	1.3326e-08	8	9	GSBRNA2T00153974001:promoter,GSBRNA2T00153975001:exon
chrA05	16778800	16779300	500	hyper	112	379	35	592	22.81	5.58	1.7713e-13	11	11	GSBRNA2T00153937001:promoter
chrA05	16778800	16779300	500	hyper	112	379	35	592	22.81	5.58	1.7713e-13	11	11	GSBRNA2T00153937001:promoter
chrA05	17420900	17421400	500	hyper	179	38	0	49	82.49	0	1.1492e-09	16	5	GSBRNA2T00153804001:promoter
chrA05	17420900	17421400	500	hyper	179	38	0	49	82.49	0	1.1492e-09	16	5	GSBRNA2T00153804001:promoter
chrA05	17447100	17447600	500	hyper	63	17	86	152	78.75	36.13	0.0001823	8	23	GSBRNA2T00153799001:promoter
chrA05	17447100	17447600	500	hyper	63	17	86	152	78.75	36.13	0.0001823	8	23	GSBRNA2T00153799001:promoter,GSBRNA2T00153799001:exon
chrA05	17465700	17466200	500	hyper	30	13	0	33	69.77	0	1.3668e-05	8	6	GSBRNA2T00153795001:exon
chrA05	17530200	17530700	500	hyper	48	23	0	50	67.61	0	1.1119e-07	11	8	GSBRNA2T00153783001:exon,GSBRNA2T00153783001:exon
chrA05	18046200	18047200	1000	hyper	399	71	34	310	84.89	9.88	2.5135e-36	18	19	GSBRNA2T00104919001:promoter
chrA05	18046200	18047200	1000	hyper	399	71	34	310	84.89	9.88	2.5135e-36	18	19	GSBRNA2T00104919001:promoter
chrA05	18089300	18089800	500	hyper	50	65	0	55	43.48	0	3.4139e-06	8	8	GSBRNA2T00104912001:promoter
chrA05	18089300	18089800	500	hyper	50	65	0	55	43.48	0	3.4139e-06	8	8	GSBRNA2T00104912001:promoter
chrA05	18157800	18158300	500	hyper	27	26	0	64	50.94	0	2.5224e-07	5	8	GSBRNA2T00104901001:promoter
chrA05	18157800	18158300	500	hyper	27	26	0	64	50.94	0	2.5224e-07	5	8	GSBRNA2T00104901001:promoter,GSBRNA2T00104900001:exon,GSBRNA2T00104900001:exon
chrA05	18465500	18466000	500	hyper	55	32	1	57	63.22	1.72	9.6212e-08	7	5	GSBRNA2T00104823001:promoter
chrA05	18465500	18466000	500	hyper	55	32	1	57	63.22	1.72	9.6212e-08	7	5	GSBRNA2T00104823001:promoter,GSBRNA2T00104822001:exon
chrA05	18533300	18533800	500	hyper	55	78	0	95	41.35	0	4.2693e-09	7	7	GSBRNA2T00104805001:promoter,GSBRNA2T00104804001:promoter
chrA05	18533300	18533800	500	hyper	55	78	0	95	41.35	0	4.2693e-09	7	7	GSBRNA2T00104805001:promoter,GSBRNA2T00104804001:promoter
chrA05	18625500	18626000	500	hyper	92	2	10	21	97.87	32.26	0.0034841	14	6	GSBRNA2T00104789001:promoter
chrA05	18625500	18626000	500	hyper	92	2	10	21	97.87	32.26	0.0034841	14	6	GSBRNA2T00104789001:promoter,GSBRNA2T00104788001:exon,GSBRNA2T00104788001:exon,GSBRNA2T00104788001:exon
chrA05	18729900	18730400	500	hyper	46	37	5	75	55.42	6.25	5.6525e-07	9	10	GSBRNA2T00104765001:promoter
chrA05	18729900	18730400	500	hyper	46	37	5	75	55.42	6.25	5.6525e-07	9	10	GSBRNA2T00104765001:promoter
chrA05	18753700	18754200	500	hyper	68	56	1	106	54.84	0.93	9.4994e-12	8	10	GSBRNA2T00104760001:promoter,GSBRNA2T00104761001:promoter
chrA05	18753700	18754200	500	hyper	68	56	1	106	54.84	0.93	9.4994e-12	8	10	GSBRNA2T00104760001:promoter,GSBRNA2T00104761001:promoter
chrA05	18986900	18987400	500	hyper	40	16	0	40	71.43	0	1.179e-06	9	5	GSBRNA2T00104708001:exon
chrA05	19091700	19092200	500	hyper	88	15	3	25	85.44	10.71	0.00013247	12	5	GSBRNA2T00079394001:intron
chrA05	19150800	19151300	500	hyper	117	74	30	93	61.26	24.39	6.6842e-05	6	5	GSBRNA2T00079405001:exon
chrA05	19267100	19267600	500	hyper	22	51	0	38	30.14	0	0.0011656	7	6	GSBRNA2T00028214001:promoter
chrA05	19267100	19267600	500	hyper	22	51	0	38	30.14	0	0.0011656	7	6	GSBRNA2T00028214001:promoter,GSBRNA2T00028215001:exon,GSBRNA2T00028215001:exon,GSBRNA2T00028215001:exon,GSBRNA2T00028215001:exon
chrA05	19456800	19457300	500	hyper	45	14	19	44	76.27	30.16	0.0041745	6	6	GSBRNA2T00000192001:promoter
chrA05	19456800	19457300	500	hyper	45	14	19	44	76.27	30.16	0.0041745	6	6	GSBRNA2T00000192001:promoter
chrA05	19457400	19457900	500	hyper	184	13	79	61	93.4	56.43	0.0036785	8	8	GSBRNA2T00000192001:promoter
chrA05	19457400	19457900	500	hyper	184	13	79	61	93.4	56.43	0.0036785	8	8	GSBRNA2T00000192001:promoter
chrA05	19458200	19458700	500	hyper	188	25	23	54	88.26	29.87	1.5082e-05	8	7	GSBRNA2T00000193001:intron
chrA05	19459000	19459500	500	hyper	53	28	0	59	65.43	0	1.4125e-08	6	6	GSBRNA2T00000193001:intron
chrA05	19479400	19479900	500	hyper	35	31	0	27	53.03	0	0.00033253	10	5	GSBRNA2T00000201001:exon,GSBRNA2T00000201001:exon
chrA05	19642200	19642700	500	hyper	21	61	0	68	25.61	0	7.0215e-05	9	9	GSBRNA2T00000251001:promoter
chrA05	19642200	19642700	500	hyper	21	61	0	68	25.61	0	7.0215e-05	9	9	GSBRNA2T00000251001:promoter,GSBRNA2T00000250001:exon
chrA05	20429100	20430100	1000	hyper	105	7	40	88	93.75	31.25	7.9792e-07	11	11	GSBRNA2T00080675001:promoter,GSBRNA2T00080676001:promoter
chrA05	20429100	20430100	1000	hyper	105	7	40	88	93.75	31.25	7.9792e-07	11	11	GSBRNA2T00080675001:promoter,GSBRNA2T00080676001:promoter
chrA05	20436300	20436800	500	hyper	47	10	24	42	82.46	36.36	0.0075548	6	5	GSBRNA2T00080673001:promoter
chrA05	20436300	20436800	500	hyper	47	10	24	42	82.46	36.36	0.0075548	6	5	GSBRNA2T00080673001:promoter
chrA05	20486400	20487900	1500	hyper	167	308	5	548	35.16	0.9	3.178e-35	21	23	GSBRNA2T00080662001:promoter
chrA05	20486400	20487900	1500	hyper	167	308	5	548	35.16	0.9	3.178e-35	21	23	GSBRNA2T00080662001:promoter,GSBRNA2T00080661001:exon,GSBRNA2T00080661001:exon
chrA05	20598600	20599100	500	hyper	120	6	12	37	95.24	24.49	3.945e-05	13	6	GSBRNA2T00059557001:promoter,GSBRNA2T00059555001:promoter
chrA05	20598600	20599100	500	hyper	120	6	12	37	95.24	24.49	3.945e-05	13	6	GSBRNA2T00059557001:promoter,GSBRNA2T00059555001:promoter,GSBRNA2T00059556001:exon
chrA05	20748000	20748500	500	hyper	17	24	0	61	41.46	0	4.9431e-06	6	8	GSBRNA2T00059525001:promoter
chrA05	20748000	20748500	500	hyper	17	24	0	61	41.46	0	4.9431e-06	6	8	GSBRNA2T00059525001:promoter
chrA05	21078700	21079200	500	hyper	11	35	0	64	23.91	0	0.00022788	7	8	GSBRNA2T00027030001:exon,GSBRNA2T00027030001:exon
chrA05	21344300	21344800	500	hyper	64	71	11	99	47.41	10	2.3105e-06	10	10	GSBRNA2T00027071001:intron
chrA05	21457700	21458200	500	hyper	13	29	0	89	30.95	0	1.5189e-06	5	5	GSBRNA2T00027085001:promoter
chrA05	21457700	21458200	500	hyper	13	29	0	89	30.95	0	1.5189e-06	5	5	GSBRNA2T00027085001:promoter
chrA05	21474300	21475300	1000	hyper	174	95	0	66	64.68	0	3.4745e-10	34	11	GSBRNA2T00027089001:promoter
chrA05	21474300	21475300	1000	hyper	174	95	0	66	64.68	0	3.4745e-10	34	11	GSBRNA2T00027089001:promoter,GSBRNA2T00027089001:exon,GSBRNA2T00027089001:exon,GSBRNA2T00027089001:exon
chrA05	21651400	21651900	500	hyper	50	26	0	51	65.79	0	1.0907e-07	6	6	GSBRNA2T00038534001:promoter
chrA05	21651400	21651900	500	hyper	50	26	0	51	65.79	0	1.0907e-07	6	6	GSBRNA2T00038534001:promoter
chrA05	22164300	22164800	500	hyper	33	29	0	163	53.23	0	7.7785e-16	5	6	GSBRNA2T00076117001:promoter
chrA05	22164300	22164800	500	hyper	33	29	0	163	53.23	0	7.7785e-16	5	6	GSBRNA2T00076117001:promoter
chrA05	22356800	22357800	1000	hyper	61	35	0	105	63.54	0	3.0479e-13	12	14	GSBRNA2T00076092001:promoter
chrA05	22356800	22357800	1000	hyper	61	35	0	105	63.54	0	3.0479e-13	12	14	GSBRNA2T00076092001:promoter,GSBRNA2T00076092001:exon
chrA05	22501100	22501600	500	hyper	63	10	82	109	86.3	42.93	0.0011791	11	13	GSBRNA2T00092875001:promoter
chrA05	22501100	22501600	500	hyper	63	10	82	109	86.3	42.93	0.0011791	11	13	GSBRNA2T00092875001:promoter
chrA05	22866000	22866500	500	hyper	436	45	33	184	90.64	15.21	9.3489e-23	7	7	GSBRNA2T00064143001:promoter,GSBRNA2T00064142001:promoter
chrA05	22866000	22866500	500	hyper	436	45	33	184	90.64	15.21	9.3489e-23	7	7	GSBRNA2T00064143001:promoter,GSBRNA2T00064142001:promoter
chrA05_random	50400	50900	500	hyper	178	67	0	61	72.65	0	1.8674e-10	24	6	GSBRNA2T00016793001:promoter
chrA05_random	50400	50900	500	hyper	178	67	0	61	72.65	0	1.8674e-10	24	6	GSBRNA2T00016793001:promoter,GSBRNA2T00016794001:exon
chrA05_random	70100	70600	500	hyper	24	4	0	59	85.71	0	3.7629e-09	5	8	GSBRNA2T00016797001:promoter
chrA05_random	70100	70600	500	hyper	24	4	0	59	85.71	0	3.7629e-09	5	8	GSBRNA2T00016797001:promoter,GSBRNA2T00016797001:exon
chrA05_random	111300	111800	500	hyper	35	7	1	79	83.33	1.25	3.502e-11	5	7	GSBRNA2T00016978001:exon
chrA05_random	131600	134000	2400	hyper	873	81	0	207	91.51	0	1.4171e-39	53	22	GSBRNA2T00016983001:promoter,GSBRNA2T00016985001:promoter
chrA05_random	131600	134000	2400	hyper	873	81	0	207	91.51	0	1.4171e-39	53	22	GSBRNA2T00016983001:promoter,GSBRNA2T00016985001:promoter,GSBRNA2T00016983001:exon,GSBRNA2T00016983001:exon
chrA05_random	293300	293800	500	hyper	87	32	0	173	73.11	0	2.0726e-22	8	12	GSBRNA2T00011052001:exon
chrA05_random	725300	725800	500	hyper	78	117	2	69	40	2.82	3.3202e-06	10	7	GSBRNA2T00017312001:exon,GSBRNA2T00017312001:exon
chrA05_random	765500	766000	500	hyper	85	47	0	32	64.39	0	1.286e-05	12	6	GSBRNA2T00027744001:promoter
chrA05_random	765500	766000	500	hyper	85	47	0	32	64.39	0	1.286e-05	12	6	GSBRNA2T00027744001:promoter
chrA05_random	1010200	1010700	500	hyper	42	39	0	53	51.85	0	1.0857e-06	6	5	GSBRNA2T00007472001:promoter
chrA05_random	1010200	1010700	500	hyper	42	39	0	53	51.85	0	1.0857e-06	6	5	GSBRNA2T00007472001:promoter
chrA05_random	1780200	1780700	500	hyper	39	29	0	44	57.35	0	3.3205e-06	10	7	GSBRNA2T00020949001:exon
chrA05_random	2219700	2220200	500	hyper	153	50	0	79	75.37	0	4.5896e-13	10	8	GSBRNA2T00088642001:exon
chrA05_random	2395500	2396000	500	hyper	69	46	1	122	60	0.81	4.8419e-14	8	8	GSBRNA2T00027588001:promoter,GSBRNA2T00027587001:promoter
chrA05_random	2395500	2396000	500	hyper	69	46	1	122	60	0.81	4.8419e-14	8	8	GSBRNA2T00027588001:promoter,GSBRNA2T00027587001:promoter,GSBRNA2T00027587001:exon
chrA05_random	2421000	2421500	500	hyper	45	23	0	31	66.18	0	2.26e-05	7	5	GSBRNA2T00027593001:exon,GSBRNA2T00027593001:exon
chrA05_random	2562100	2564200	2100	hyper	396	64	10	305	86.09	3.17	2.9459e-44	24	23	GSBRNA2T00003483001:promoter
chrA05_random	2562100	2564200	2100	hyper	396	64	10	305	86.09	3.17	2.9459e-44	24	23	GSBRNA2T00003483001:promoter
chrA05_random	2631100	2631600	500	hyper	29	55	0	30	34.52	0	0.0018856	9	6	GSBRNA2T00003496001:exon
chrA05_random	2661800	2663200	1400	hyper	179	55	4	83	76.5	4.6	2.6814e-12	18	10	GSBRNA2T00004026001:promoter,GSBRNA2T00004027001:promoter
chrA05_random	2661800	2663200	1400	hyper	179	55	4	83	76.5	4.6	2.6814e-12	18	10	GSBRNA2T00004026001:promoter,GSBRNA2T00004027001:promoter,GSBRNA2T00004027001:exon,GSBRNA2T00004027001:exon
chrA05_random	2734900	2736000	1100	hyper	1165	461	0	83	71.65	0	2.2938e-14	40	15	GSBRNA2T00004039001:promoter
chrA05_random	2734900	2736000	1100	hyper	1165	461	0	83	71.65	0	2.2938e-14	40	15	GSBRNA2T00004039001:promoter,GSBRNA2T00004039001:exon,GSBRNA2T00004039001:exon
chrA06	32200	32700	500	hyper	58	1	0	36	98.31	0	8.2704e-08	5	6	GSBRNA2T00008087001:promoter
chrA06	32200	32700	500	hyper	58	1	0	36	98.31	0	8.2704e-08	5	6	GSBRNA2T00008087001:promoter,GSBRNA2T00008087001:exon
chrA06	36200	36700	500	hyper	121	37	23	86	76.58	21.1	2.6349e-07	6	5	GSBRNA2T00008082001:promoter
chrA06	36200	36700	500	hyper	121	37	23	86	76.58	21.1	2.6349e-07	6	5	GSBRNA2T00008082001:promoter
chrA06	439700	440200	500	hyper	39	35	14	73	52.7	16.09	0.00047594	8	5	GSBRNA2T00024605001:promoter
chrA06	439700	440200	500	hyper	39	35	14	73	52.7	16.09	0.00047594	8	5	GSBRNA2T00024605001:promoter
chrA06	691900	692400	500	hyper	112	6	8	49	94.92	14.04	1.3402e-07	5	6	GSBRNA2T00024659001:promoter
chrA06	691900	692400	500	hyper	112	6	8	49	94.92	14.04	1.3402e-07	5	6	GSBRNA2T00024659001:promoter
chrA06	740400	740900	500	hyper	56	18	0	57	75.68	0	3.2132e-09	7	8	GSBRNA2T00024665001:promoter
chrA06	740400	740900	500	hyper	56	18	0	57	75.68	0	3.2132e-09	7	8	GSBRNA2T00024665001:promoter
chrA06	757300	757800	500	hyper	63	12	7	131	84	5.07	1.7756e-15	6	8	GSBRNA2T00024671001:promoter
chrA06	757300	757800	500	hyper	63	12	7	131	84	5.07	1.7756e-15	6	8	GSBRNA2T00024671001:promoter
chrA06	762500	763000	500	hyper	69	23	0	61	75	0	7.3225e-10	7	6	GSBRNA2T00024674001:promoter,GSBRNA2T00024673001:promoter
chrA06	762500	763000	500	hyper	69	23	0	61	75	0	7.3225e-10	7	6	GSBRNA2T00024674001:promoter,GSBRNA2T00024673001:promoter,GSBRNA2T00024674001:exon
chrA06	786200	786700	500	hyper	33	29	0	80	53.23	0	4.8528e-09	7	9	GSBRNA2T00024680001:promoter
chrA06	786200	786700	500	hyper	33	29	0	80	53.23	0	4.8528e-09	7	9	GSBRNA2T00024680001:promoter
chrA06	857300	857800	500	hyper	58	13	0	80	81.69	0	1.7156e-12	5	6	GSBRNA2T00003340001:promoter
chrA06	857300	857800	500	hyper	58	13	0	80	81.69	0	1.7156e-12	5	6	GSBRNA2T00003340001:promoter
chrA06	889400	889900	500	hyper	77	6	5	61	92.77	7.58	1.7355e-09	7	5	GSBRNA2T00003346001:promoter,GSBRNA2T00003345001:promoter
chrA06	889400	889900	500	hyper	77	6	5	61	92.77	7.58	1.7355e-09	7	5	GSBRNA2T00003346001:promoter,GSBRNA2T00003345001:promoter
chrA06	892100	893100	1000	hyper	224	131	25	131	63.1	16.03	4.8584e-10	35	23	GSBRNA2T00003346001:exon,GSBRNA2T00003346001:exon
chrA06	1003300	1003800	500	hyper	28	29	0	42	49.12	0	2.5214e-05	7	5	GSBRNA2T00008258001:exon,GSBRNA2T00008258001:exon,GSBRNA2T00008259001:exon
chrA06	1088200	1088700	500	hyper	22	23	0	29	48.89	0	0.00044019	7	5	GSBRNA2T00011471001:promoter,GSBRNA2T00050984001:promoter
chrA06	1088200	1088700	500	hyper	22	23	0	29	48.89	0	0.00044019	7	5	GSBRNA2T00011471001:promoter,GSBRNA2T00050984001:promoter,GSBRNA2T00050983001:exon
chrA06	1153300	1153800	500	hyper	85	36	1	90	70.25	1.1	1.539e-12	8	8	GSBRNA2T00021239001:intron
chrA06	1227300	1227800	500	hyper	66	88	11	104	42.86	9.57	4.7177e-06	15	18	GSBRNA2T00021225001:promoter,GSBRNA2T00021226001:promoter
chrA06	1227300	1227800	500	hyper	66	88	11	104	42.86	9.57	4.7177e-06	15	18	GSBRNA2T00021225001:promoter,GSBRNA2T00021226001:promoter
chrA06	1254100	1254600	500	hyper	78	6	35	50	92.86	41.18	0.0012998	5	6	GSBRNA2T00021220001:promoter
chrA06	1254100	1254600	500	hyper	78	6	35	50	92.86	41.18	0.0012998	5	6	GSBRNA2T00021220001:promoter
chrA06	1470000	1470500	500	hyper	52	33	0	35	61.18	0	1.2792e-05	7	5	GSBRNA2T00021164001:promoter
chrA06	1470000	1470500	500	hyper	52	33	0	35	61.18	0	1.2792e-05	7	5	GSBRNA2T00021164001:promoter,GSBRNA2T00021164001:exon
chrA06	1869200	1869700	500	hyper	158	6	14	87	96.34	13.86	3.6091e-12	9	8	GSBRNA2T00098086001:exon
chrA06	1974400	1976300	1900	hyper	268	43	1	204	86.17	0.49	1.2484e-32	22	18	GSBRNA2T00091905001:promoter
chrA06	1974400	1976300	1900	hyper	268	43	1	204	86.17	0.49	1.2484e-32	22	18	GSBRNA2T00091905001:promoter
chrA06	1976700	1977200	500	hyper	32	30	0	36	51.61	0	5.5303e-05	6	6	GSBRNA2T00091905001:promoter
chrA06	1976700	1977200	500	hyper	32	30	0	36	51.61	0	5.5303e-05	6	6	GSBRNA2T00091905001:promoter
chrA06	2021200	2021700	500	hyper	73	8	7	70	90.12	9.09	1.0776e-09	7	6	GSBRNA2T00091897001:promoter,GSBRNA2T00091896001:promoter
chrA06	2021200	2021700	500	hyper	73	8	7	70	90.12	9.09	1.0776e-09	7	6	GSBRNA2T00091897001:promoter,GSBRNA2T00091896001:promoter
chrA06	2037400	2037900	500	hyper	125	10	1	80	92.59	1.23	1.7253e-14	8	9	GSBRNA2T00037678001:promoter
chrA06	2037400	2037900	500	hyper	125	10	1	80	92.59	1.23	1.7253e-14	8	9	GSBRNA2T00037678001:promoter
chrA06	2082200	2082700	500	hyper	40	32	1	84	55.56	1.18	2.7269e-09	7	7	GSBRNA2T00156404001:exon
chrA06	2176500	2177000	500	hyper	25	20	0	36	55.56	0	4.0981e-05	5	5	GSBRNA2T00156381001:promoter
chrA06	2176500	2177000	500	hyper	25	20	0	36	55.56	0	4.0981e-05	5	5	GSBRNA2T00156381001:promoter,GSBRNA2T00156380001:exon,GSBRNA2T00156380001:exon
chrA06	2189500	2190000	500	hyper	89	15	0	84	85.58	0	4.1984e-14	8	8	GSBRNA2T00156379001:exon
chrA06	2638000	2639000	1000	hyper	271	33	0	210	89.14	0	9.6861e-35	17	18	GSBRNA2T00156284001:promoter,GSBRNA2T00156286001:promoter,GSBRNA2T00156285001:promoter
chrA06	2638000	2639000	1000	hyper	271	33	0	210	89.14	0	9.6861e-35	17	18	GSBRNA2T00156284001:promoter,GSBRNA2T00156286001:promoter,GSBRNA2T00156285001:promoter
chrA06	2671700	2672200	500	hyper	56	82	0	61	40.58	0	2.0333e-06	9	8	GSBRNA2T00156276001:exon
chrA06	2783500	2784000	500	hyper	129	78	0	31	62.32	0	1.8355e-05	17	5	GSBRNA2T00156250001:promoter
chrA06	2783500	2784000	500	hyper	129	78	0	31	62.32	0	1.8355e-05	17	5	GSBRNA2T00156250001:promoter
chrA06	3070000	3072000	2000	hyper	588	95	0	332	86.09	0	1.0822e-54	42	39	GSBRNA2T00156178001:promoter
chrA06	3070000	3072000	2000	hyper	588	95	0	332	86.09	0	1.0822e-54	42	39	GSBRNA2T00156178001:promoter,GSBRNA2T00156178001:exon,GSBRNA2T00156178001:exon,GSBRNA2T00156178001:exon,GSBRNA2T00156178001:exon
chrA06	3105900	3106900	1000	hyper	272	42	0	134	86.62	0	1.5543e-23	19	15	GSBRNA2T00156170001:promoter,GSBRNA2T00156169001:promoter
chrA06	3105900	3106900	1000	hyper	272	42	0	134	86.62	0	1.5543e-23	19	15	GSBRNA2T00156170001:promoter,GSBRNA2T00156169001:promoter,GSBRNA2T00156169001:exon
chrA06	3325100	3325600	500	hyper	72	89	2	91	44.72	2.15	1.5183e-08	18	9	GSBRNA2T00156110001:promoter
chrA06	3325100	3325600	500	hyper	72	89	2	91	44.72	2.15	1.5183e-08	18	9	GSBRNA2T00156110001:promoter
chrA06	3390400	3390900	500	hyper	39	62	0	48	38.61	0	4.0001e-05	10	7	GSBRNA2T00156093001:promoter
chrA06	3390400	3390900	500	hyper	39	62	0	48	38.61	0	4.0001e-05	10	7	GSBRNA2T00156093001:promoter
chrA06	3463400	3463900	500	hyper	58	44	0	68	56.86	0	8.9358e-09	12	11	GSBRNA2T00156072001:promoter
chrA06	3463400	3463900	500	hyper	58	44	0	68	56.86	0	8.9358e-09	12	11	GSBRNA2T00156072001:promoter
chrA06	3738800	3739300	500	hyper	47	26	0	87	64.38	0	3.145e-11	6	6	GSBRNA2T00105295001:promoter
chrA06	3738800	3739300	500	hyper	47	26	0	87	64.38	0	3.145e-11	6	6	GSBRNA2T00105295001:promoter
chrA06	3906700	3907700	1000	hyper	169	51	0	108	76.82	0	3.4031e-17	17	12	GSBRNA2T00105339001:promoter
chrA06	3906700	3907700	1000	hyper	169	51	0	108	76.82	0	3.4031e-17	17	12	GSBRNA2T00105339001:promoter
chrA06	4110600	4111700	1100	hyper	251	16	0	167	94.01	0	1.292e-29	17	16	GSBRNA2T00105383001:promoter,GSBRNA2T00105384001:promoter
chrA06	4110600	4111700	1100	hyper	251	16	0	167	94.01	0	1.292e-29	17	16	GSBRNA2T00105383001:promoter,GSBRNA2T00105384001:promoter,GSBRNA2T00105383001:exon
chrA06	4338300	4338800	500	hyper	95	48	0	44	66.43	0	2.6554e-07	11	6	GSBRNA2T00105436001:promoter
chrA06	4338300	4338800	500	hyper	95	48	0	44	66.43	0	2.6554e-07	11	6	GSBRNA2T00105436001:promoter
chrA06	4444100	4444600	500	hyper	46	8	0	38	85.19	0	3.0465e-07	5	5	GSBRNA2T00105460001:promoter
chrA06	4444100	4444600	500	hyper	46	8	0	38	85.19	0	3.0465e-07	5	5	GSBRNA2T00105460001:promoter
chrA06	4663100	4663600	500	hyper	81	26	11	101	75.7	9.82	1.1157e-10	6	6	GSBRNA2T00105496001:promoter
chrA06	4663100	4663600	500	hyper	81	26	11	101	75.7	9.82	1.1157e-10	6	6	GSBRNA2T00105496001:promoter
chrA06	5007000	5007500	500	hyper	37	10	19	54	78.72	26.03	0.00087344	5	7	GSBRNA2T00081700001:exon,GSBRNA2T00081700001:exon
chrA06	5130100	5130600	500	hyper	67	82	1	98	44.97	1.01	1.5488e-09	10	10	GSBRNA2T00081734001:promoter,GSBRNA2T00081733001:promoter
chrA06	5130100	5130600	500	hyper	67	82	1	98	44.97	1.01	1.5488e-09	10	10	GSBRNA2T00081734001:promoter,GSBRNA2T00081733001:promoter
chrA06	5381200	5381700	500	hyper	312	26	9	70	92.31	11.39	1.975e-11	18	10	GSBRNA2T00062252001:promoter,GSBRNA2T00062253001:promoter
chrA06	5381200	5381700	500	hyper	312	26	9	70	92.31	11.39	1.975e-11	18	10	GSBRNA2T00062252001:promoter,GSBRNA2T00062253001:promoter,GSBRNA2T00062252001:exon
chrA06	5465300	5465800	500	hyper	72	24	0	119	75	0	1.5707e-16	8	11	GSBRNA2T00062270001:promoter
chrA06	5465300	5465800	500	hyper	72	24	0	119	75	0	1.5707e-16	8	11	GSBRNA2T00062270001:promoter
chrA06	5504200	5505200	1000	hyper	97	26	80	196	78.86	28.99	4.6554e-08	11	17	GSBRNA2T00062277001:promoter
chrA06	5504200	5505200	1000	hyper	97	26	80	196	78.86	28.99	4.6554e-08	11	17	GSBRNA2T00062277001:promoter
chrA06	5718000	5718500	500	hyper	66	5	4	30	92.96	11.76	2.77e-05	9	5	GSBRNA2T00057959001:promoter
chrA06	5718000	5718500	500	hyper	66	5	4	30	92.96	11.76	2.77e-05	9	5	GSBRNA2T00057959001:promoter
chrA06	5718600	5719100	500	hyper	96	37	0	39	72.18	0	4.4825e-07	7	5	GSBRNA2T00057959001:promoter
chrA06	5718600	5719100	500	hyper	96	37	0	39	72.18	0	4.4825e-07	7	5	GSBRNA2T00057959001:promoter
chrA06	5766300	5766800	500	hyper	87	2	16	39	97.75	29.09	0.00010446	13	6	GSBRNA2T00057969001:promoter
chrA06	5766300	5766800	500	hyper	87	2	16	39	97.75	29.09	0.00010446	13	6	GSBRNA2T00057969001:promoter
chrA06	5872700	5873200	500	hyper	24	68	0	44	26.09	0	0.0010656	12	7	GSBRNA2T00057991001:exon,GSBRNA2T00057991001:exon
chrA06	5933800	5935300	1500	hyper	171	11	116	114	93.96	50.43	6.1243e-05	23	29	GSBRNA2T00058014001:promoter
chrA06	5933800	5935300	1500	hyper	171	11	116	114	93.96	50.43	6.1243e-05	23	29	GSBRNA2T00058014001:promoter,GSBRNA2T00058014001:exon,GSBRNA2T00058014001:exon,GSBRNA2T00058014001:exon,GSBRNA2T00058014001:exon,GSBRNA2T00058014001:exon
chrA06	6010700	6013100	2400	hyper	307	141	14	233	68.53	5.67	3.9236e-26	49	29	GSBRNA2T00034933001:promoter
chrA06	6010700	6013100	2400	hyper	307	141	14	233	68.53	5.67	3.9236e-26	49	29	GSBRNA2T00034933001:promoter,GSBRNA2T00034933001:exon,GSBRNA2T00034933001:exon
chrA06	6058900	6059400	500	hyper	48	1	14	24	97.96	36.84	0.0077417	8	5	GSBRNA2T00034920001:exon,GSBRNA2T00034920001:exon
chrA06	6206100	6207300	1200	hyper	191	19	39	153	90.95	20.31	1.0177e-14	15	13	GSBRNA2T00034887001:promoter
chrA06	6206100	6207300	1200	hyper	191	19	39	153	90.95	20.31	1.0177e-14	15	13	GSBRNA2T00034887001:promoter,GSBRNA2T00034887001:exon
chrA06	6633800	6635500	1700	hyper	331	53	0	184	86.2	0	3.6168e-31	24	18	GSBRNA2T00035656001:promoter
chrA06	6633800	6635500	1700	hyper	331	53	0	184	86.2	0	3.6168e-31	24	18	GSBRNA2T00035656001:promoter
chrA06	6760900	6761400	500	hyper	28	56	7	71	33.33	8.97	0.0022961	9	8	GSBRNA2T00035637001:promoter
chrA06	6760900	6761400	500	hyper	28	56	7	71	33.33	8.97	0.0022961	9	8	GSBRNA2T00035637001:promoter,GSBRNA2T00035637001:exon
chrA06	6778000	6778500	500	hyper	66	9	10	42	88	19.23	3.1826e-05	5	5	GSBRNA2T00035634001:promoter,GSBRNA2T00035633001:promoter
chrA06	6778000	6778500	500	hyper	66	9	10	42	88	19.23	3.1826e-05	5	5	GSBRNA2T00035634001:promoter,GSBRNA2T00035633001:promoter,GSBRNA2T00035633001:exon,GSBRNA2T00035633001:exon,GSBRNA2T00035633001:exon
chrA06	6786900	6787400	500	hyper	166	21	0	57	88.77	0	1.9301e-11	16	7	GSBRNA2T00035630001:exon,GSBRNA2T00035630001:exon
chrA06	6864700	6865700	1000	hyper	433	40	6	114	91.54	5	5.4906e-20	29	17	GSBRNA2T00035612001:promoter
chrA06	6864700	6865700	1000	hyper	433	40	6	114	91.54	5	5.4906e-20	29	17	GSBRNA2T00035612001:promoter,GSBRNA2T00035613001:exon,GSBRNA2T00035613001:exon
chrA06	6900800	6901300	500	hyper	24	4	0	91	85.71	0	1.2096e-12	5	11	GSBRNA2T00035603001:promoter,GSBRNA2T00035604001:promoter
chrA06	6900800	6901300	500	hyper	24	4	0	91	85.71	0	1.2096e-12	5	11	GSBRNA2T00035603001:promoter,GSBRNA2T00035604001:promoter
chrA06	7427600	7428100	500	hyper	27	11	6	25	71.05	19.35	0.0085808	6	5	GSBRNA2T00042989001:promoter
chrA06	7427600	7428100	500	hyper	27	11	6	25	71.05	19.35	0.0085808	6	5	GSBRNA2T00042989001:promoter
chrA06	7457500	7458000	500	hyper	77	4	26	36	95.06	41.94	0.0034542	7	9	GSBRNA2T00042984001:promoter
chrA06	7457500	7458000	500	hyper	77	4	26	36	95.06	41.94	0.0034542	7	9	GSBRNA2T00042984001:promoter
chrA06	7458500	7459900	1400	hyper	305	25	0	181	92.42	0	4.8054e-32	26	18	GSBRNA2T00042984001:promoter
chrA06	7458500	7459900	1400	hyper	305	25	0	181	92.42	0	4.8054e-32	26	18	GSBRNA2T00042984001:promoter,GSBRNA2T00042984001:exon,GSBRNA2T00042984001:exon
chrA06	7723100	7723600	500	hyper	19	20	0	43	48.72	0	3.1088e-05	5	7	GSBRNA2T00042944001:exon,GSBRNA2T00042944001:exon,GSBRNA2T00042944001:exon
chrA06	7790500	7791900	1400	hyper	163	22	4	69	88.11	5.48	1.2839e-11	17	11	GSBRNA2T00043228001:promoter
chrA06	7790500	7791900	1400	hyper	163	22	4	69	88.11	5.48	1.2839e-11	17	11	GSBRNA2T00043228001:promoter
chrA06	7864300	7865500	1200	hyper	92	33	0	67	73.6	0	9.0506e-11	16	11	GSBRNA2T00043209001:promoter
chrA06	7864300	7865500	1200	hyper	92	33	0	67	73.6	0	9.0506e-11	16	11	GSBRNA2T00043209001:promoter
chrA06	8098200	8099200	1000	hyper	275	48	0	87	85.14	0	2.9398e-16	20	12	GSBRNA2T00043163001:promoter,GSBRNA2T00043162001:promoter
chrA06	8098200	8099200	1000	hyper	275	48	0	87	85.14	0	2.9398e-16	20	12	GSBRNA2T00043163001:promoter,GSBRNA2T00043162001:promoter
chrA06	8171200	8171700	500	hyper	15	20	0	40	42.86	0	0.0001478	7	5	GSBRNA2T00043145001:exon
chrA06	8175100	8175600	500	hyper	64	5	8	37	92.75	17.78	2.9924e-05	7	6	GSBRNA2T00043145001:promoter
[truncated: 2,689 more rows]
